# Supplementary material for: High clonal diversity and spatial genetic admixture in early prostate cancer and surrounding normal tissue
Source: Research Square preprint supplement (doi:10.21203/rs.3.rs-1093341/v1), 2021-11-19
Supplement: Supplementary file 1 [file 1c2b13ab1e6aaa362718c354.xlsx]

## Sheet: Suppl Table 3
Supplementary Table 3. Pathological characteristics of the prostate samples used in this study.
				Pre-operative			Post-operative
Sample ID	Initial PSA	Prostate volume (cm3)	Tumor length (mm)	Stage	Gleason grading	Gleason score	Stage	Gleason grading	Gleason score	Surgical margins
P1	6.9	33	44	cT1cN0M0	4+3	7b	pT2c	3+4	7	positive 0.5 mm
P2	5.7	25	15	cT1cN0M0	3+4	7	pT2c	3+4	7	positive 1 mm
P3	5.8	51	24	cT1cN0M0	3+4	7	pT2c	3+4	7	negative
P4	9	67	38	cT2N0M0	3+4	7	pT2c	3+4	7	negative
P5	11	53	35	cT1cN0M0	3+4	7	pT2c	3+4	7	negative
P6	5.5	35	40	cT2N0M0	4+3	7b	pT3a	4+3	7b	negative
