# Supplementary material for: High clonal diversity and spatial genetic admixture in early prostate cancer and surrounding normal tissue
Source: Research Square preprint supplement (doi:10.21203/rs.3.rs-1093341/v1), 2021-11-19
Supplement: Supplementary file 3 [file 6716fd46aa1e2c0e5acaca45.xlsx]

## Sheet: Metrics description
Supplementary Table 2. List of metrics describing manually annotated CNA profiles used to train a random forest classifier.
Features	Description
total_reads	Total number of reads
mean_reads	Mean number of reads per bin
median_reads	Median number of reads per bin
spikiness	Sum of absolute difference of read counts of neighbouring bins divided by total counts
non_integerness	Median absolute difference of non-rounded copy numbers segments to integer copy numbers
bin_to_medians	Median absolute difference of non-rounded bin copy numbers to non-rounded copy number segments
bin_to_integer	Median absolute difference of non-rounded bin copy numbers to rounded copy number segments
coef_variation	Standard deviation of log2 ratio of read counts divided by mean log2 ratio
autocorrelation	Autocorrelation of log2 ratio
mean_absolute_deviation	Mean absolute deviation of log2 ratio
mean_variance	Mean variance of integer copy numbers
total_halfiness	Score that penalizes non-integer copy number predictions (PMID: 31730858)
scaled_halfiness	Scaled halfiness
breakpoints	Number of breakpoints, not taking into account breakpoints between chromosomes
mean_cn	Mean integer copy number
mode_cn	Mode of the integer copy number

## Sheet: Metrics
Supplementary Table 2. List of metrics describing manually annotated CNA profiles used to train a random forest classifier
*See Supplementary Table 1 for a description of each library
sample	library ID*	total_reads	mean_reads	median_reads	spikiness	non_integerness	bin_to_medians	bin_to_integer	coef_variation	autocorrelation	mean_absolute_deviation	mean_variance	total_halfiness	scaled_halfiness	breakpoints	mean_cn	mode_cn	user_quality
AACAGAGTGCA	MS157	1009595	191.756	167	0.339302	0.0556187	1.94106	1.95225	-7.81464	0.398026	0.288731	0.067668	132.848	51.1067	2	1.9472	2	good
AACAGAGTGCA	MS81	2624126	498.409	413	0.339193	0.0724369	1.96626	1.97526	-13.9095	0.398295	0.289929	0.0570387	229.85	87.7395	7	1.9548	2	good
AACAGAGTGCA	NZ169	59875	11.3723	9	0.628476	0.124285	2.05481	2.09439	-6.08745	0.0825995	0.531226	0.160022	857.783	300.407	3	2.07749	2	bad
AACAGAGTGCA	NZ170	1390966	264.191	13	0.662975	0.107056	1.04338	1.04917	4.21958	0.533973	0.654151	1.03755	1819.73	1906.12	25	1.49478	0	bad
AACAGAGTGCA	NZ186	2284385	433.881	345	0.359986	0.0554673	1.95882	1.9534	-8.03947	0.386693	0.275258	0.0646098	144.386	57.3097	19	1.94131	2	good
AACAGAGTGCA	NZ250	3197690	607.349	499	0.335489	0.0685845	1.97738	2.00992	-15.3941	0.6862	0.384799	0.196008	182.254	65.8706	26	2.00627	2	good
AACAGCCGCGA	MS157	1324049	251.481	206	0.412004	0.130604	1.81316	1.80627	-9.8274	0.435196	0.39412	0.0644287	476.232	190.05	1	1.78632	2	good
AACAGCCGCGA	MS81	120790	22.9421	16	0.70077	0.108154	2.00348	1.97504	-23.2087	0.0792451	0.458408	0.0660205	585.562	211.269	23	1.98025	2	good
AACAGCCGCGA	NZ169	84354	16.0217	8	1.02538	0.181754	2.12773	2.17055	-6.01966	0.0999617	0.613704	0.169666	777.522	273.812	1	2.08281	2	bad
AACAGCCGCGA	NZ170	2170464	412.244	318	0.409094	0.186316	4.92124	4.91694	-3.58086	0.832903	0.617021	0.917354	113.856	20.477	16	4.38708	3	good
AACAGCCGCGA	NZ186	2683349	509.658	412	0.33799	0.0898574	1.79487	1.7877	-10.3289	0.567207	0.343416	0.080326	126.233	50.4039	2	1.78765	2	good
AACAGCCGCGA	NZ250	53768	10.2123	5	0.933008	0.172194	6.47274	6.47024	-4.02943	0.134958	0.945177	0.132512	324.104	58.7728	60	5.06553	4	bad
AACGACAGTGG	MS157	1456921	276.718	230	0.514803	0.178043	1.93163	1.9437	-3.49221	0.450075	0.612766	0.0680663	866.476	333.112	10	1.87749	2	bad
AACGACAGTGG	MS81	161196	30.6165	16	1.05361	0.123578	3.07081	3.07903	-227.368	0.0910329	0.480988	0.0815875	485.571	124.421	4	3.05071	3	bad
AACGACAGTGG	NZ169	60449	11.4813	9	0.708018	0.117839	2.07484	2.11071	-6.51362	0.0773138	0.572478	0.0940192	892.504	314.046	46	2.06876	2	bad
AACGACAGTGG	NZ170	1564186	297.091	225	0.448687	0.195113	1.9134	1.91201	-6.68273	0.633921	0.634662	0.500608	896.529	338.138	71	1.883	2	good
AACGACAGTGG	NZ186	2154872	409.282	360	0.302722	0.235217	2.6309	2.6291	-7.48057	0.67978	0.367086	0.11254	81.214	23.5847	9	2.54321	3	good
AACGACAGTGG	NZ250	50924	9.67217	6	1.09932	0.136085	3.63169	3.6556	-3.6156	0.128915	0.712366	0.137446	567.953	137.819	9	3.37227	3	bad
AACTGCTGAAG	MS157	1123556	213.401	182	0.353144	0.103228	1.80246	1.80826	-8.63157	0.467198	0.372552	0.0780129	342.924	146.1	3	1.79563	2	good
AACTGCTGAAG	MS81	2722694	517.131	417	0.324784	0.212488	2.25511	2.2716	-12.5381	0.67725	0.4384	0.0446391	188.025	60.3491	0	2.24691	3	good
AACTGCTGAAG	NZ169	3159066	600.013	166	1.02227	0.152705	5.41871	5.41613	-48.8253	0.384635	2.13047	1.08685	427.567	137.128	2	2.89193	1	bad
AACTGCTGAAG	NZ170	251462	47.7611	8	1.66274	0.13881	2.08908	2.13953	-15.9122	0.0492384	0.635987	0.235775	813.082	288.863	51	2.02013	2	bad
AACTGCTGAAG	NZ186	93349	17.7301	15	0.554864	0.12334	1.95311	1.98401	-9.90346	0.0830243	0.495972	0.0655482	696.771	256.989	5	1.96505	2	bad
AACTGCTGAAG	NZ250	2190216	415.995	366	0.327119	0.0368373	1.97819	1.97732	-11.4251	0.200315	0.254569	-0.000736493	116.77	45.3901	0	2.00171	2	good
AAGAATTCCTC	MS157	2720336	516.683	18	0.728113	0.0564611	2.74316	2.70894	14.5121	0.598813	1.32476	0.256989	521.698	343.936	15	1.56467	0	bad
AAGAATTCCTC	MS81	254650	48.3666	27	0.947438	0.137508	3.1313	3.13766	20.9161	0.124101	0.422753	0.089772	261.866	66.8227	0	3.14359	3	bad
AAGAATTCCTC	NZ169	4907122	932.027	724	0.350292	0.10774	2.16959	2.185	-12.6828	0.761265	0.419149	0.363417	214.417	76.9752	2	2.19639	2	good
AAGAATTCCTC	NZ170	2779328	527.888	375	0.454771	0.162889	5.05923	5.03449	-5.7184	0.706609	0.642553	1.40116	237.056	45.9388	22	4.83153	5	bad
AAGAATTCCTC	NZ186	4046229	768.515	599	0.346933	0.0928078	1.5397	1.5079	-5.89179	0.786064	0.484689	0.0559585	435.217	203.57	20	1.47977	2	good
AAGAATTCCTC	NZ250	4927013	935.805	792	0.345464	0.124409	1.7189	1.70873	-3.85709	0.697004	0.416753	-0.0487854	176.583	97.0656	9	1.56961	2	good
AAGACATACGA	MS157	226943	43.1041	35	0.445755	0.0402347	1.93787	1.9316	-8.62019	0.243437	0.415286	0.067668	591.621	223.15	1	1.9472	2	good
AAGACATACGA	MS81	660650	125.48	101	0.351755	0.0964698	2.01513	2.01293	-14.0024	0.403641	0.332415	0.055347	321.906	119.057	3	1.99145	2	good
AAGACATACGA	NZ169	549199	104.311	7	0.43485	0.100387	4.44431	4.417	-12.3314	0.670498	2.69011	1.06321	279.178	198.971	7	2.38082	0	bad
AAGACATACGA	NZ170	316052	60.0289	16	0.551102	0.185963	3.02707	2.99066	-6.33952	0.610393	2.36019	0.801971	732.077	269.402	0	2.01899	0	bad
AAGACATACGA	NZ186	29936	5.68585	3	1.27679	0.168541	1.90081	1.91311	-7.76332	0.0128052	0.975879	0.0706372	1175.54	404.973	3	1.91624	2	bad
AAGACATACGA	NZ250	578687	109.912	80	0.461552	0.115548	2.8126	2.80944	-11.7428	0.571101	0.515572	0.332444	414.627	120.445	0	2.79392	3	bad
AAGCAGCCGTT	MS157	967978	183.851	159	0.328796	0.0723646	1.95621	1.95384	-8.98734	0.400574	0.283452	0.0754459	162.063	61.8721	17	1.94131	2	good
AAGCAGCCGTT	MS81	166057	31.5398	10	1.46373	0.0862998	2.04239	2.07158	-32.6149	0.0454938	0.58384	0.0650641	703.861	257.985	4	1.96467	2	bad
AAGCAGCCGTT	NZ169	58258	11.0651	5	1.30621	0.113654	4.55466	4.54645	-3.38021	0.101353	0.665655	0.380844	451.22	89.4671	1	4.20057	4	bad
AAGCAGCCGTT	NZ170	1159665	220.259	93	0.67335	0.14895	6.15042	6.11914	-13.1743	0.507898	1.49778	2.18879	387.838	108.139	12	5.00646	2	bad
AAGCAGCCGTT	NZ186	1584041	300.862	247	0.412429	0.172221	2.42861	2.42697	-5.33763	0.525187	0.489349	0.0928645	452.355	152.241	10	2.3396	2	bad
AAGCAGCCGTT	NZ250	38393	7.29212	2	1.37145	0.17665	2.7949	2.88877	-8.48997	0.105604	1.14922	0.164173	851.745	258.002	11	2.76733	3	bad
AAGCGGATTCG	MS157	897572	170.479	144	0.360327	0.0906542	1.91478	1.94	-10.0162	0.402732	0.318084	0.0830087	258.302	99.9229	4	1.91814	2	good
AAGCGGATTCG	MS81	1373408	260.856	185	0.396161	0.116263	1.97162	1.97916	-16.4663	0.320514	0.314065	0.0532251	318.181	120.702	8	1.95157	2	good
AAGCGGATTCG	NZ169	2483442	471.689	381	0.315312	0.177899	2.15025	2.1482	-14.4628	0.741712	0.451901	0.61695	171.672	56.0001	1	2.18955	2	good
AAGCGGATTCG	NZ170	427747	81.2435	10	1.56607	0.246308	7.86223	7.83705	13.4436	0.174935	0.887474	0.740053	197.323	31.0792	0	5.80836	7	bad
AAGCGGATTCG	NZ186	2078943	394.861	354	0.284126	0.0916906	1.96165	1.95306	-7.45719	0.456445	0.237401	0.0646098	29.1554	11.5032	30	1.94131	2	good
AAGCGGATTCG	NZ250	11878	2.25603	2	1.18623	0.198023	6.49625	6.48179	-22260.2	0.0219627	1.41711	0.122248	362.447	64.2717	1	4.7867	5	bad
AAGCTCGCCAA	MS157	1245693	236.599	207	0.306434	0.0549125	1.95737	1.96559	-7.86559	0.409344	0.252809	0.0714035	63.305	24.861	5	1.94891	2	good
AAGCTCGCCAA	MS81	267665	50.8386	16	1.44678	0.218372	3.59314	3.56247	19.9772	0.0907532	0.533976	0.0266805	388.713	88.6943	2	3.50047	4	bad
AAGCTCGCCAA	NZ169	50379	9.56866	8	0.627404	0.187031	3.47	3.44542	-5.09246	0.140335	0.632187	0.275942	524.68	117.243	5	3.42868	3	bad
AAGCTCGCCAA	NZ170	2248168	427.002	21	0.554219	0.068828	3.00198	2.93703	26.5203	0.775529	1.48827	0.317406	399.218	276.739	11	1.67768	0	bad
AAGCTCGCCAA	NZ186	2400316	455.9	371	0.363235	0.0914776	1.94746	1.95117	-11.3715	0.384495	0.302581	0.0612998	186.245	71.9012	12	1.9453	2	good
AAGCTCGCCAA	NZ250	20220	3.84046	2	0.90094	0.0851984	3.7456	3.77786	-6.02978	0.0675114	0.923375	0.0801881	473.427	98.4747	0	4.00551	4	bad
AAGGCAGTCAT	MS157	59096	11.2243	6	1.15402	0.0727562	2.17308	2.14405	-3.61285	0.125523	0.740427	0.0665096	915.621	333.45	0	1.88376	2	bad
AAGGCAGTCAT	MS81	177363	33.6872	12	1.37273	0.227546	3.52073	3.49161	-33.1369	0.0840165	0.637498	0.0793911	450.959	107.174	8	3.30674	3	bad
AAGGCAGTCAT	NZ169	2268488	430.862	352	0.322383	0.119014	2.23688	2.24505	-19.8689	0.702139	0.429373	0.683592	212.576	71.3343	2	2.2963	2	good
AAGGCAGTCAT	NZ170	1471766	279.538	16	1.34555	0.132049	6.15339	6.12786	243.462	0.224509	1.69046	0.0682305	215.939	80.7394	0	2.64501	1	bad
AAGGCAGTCAT	NZ186	1989714	377.913	30	1.14613	0.221647	3.03853	2.90235	15.3623	0.488189	1.46896	0.148203	415.205	244.86	4	1.41956	0	bad
AAGGCAGTCAT	NZ250	1623871	308.428	217	0.408075	0.0637338	1.94684	1.95394	-16.9053	0.624676	0.399385	0.236422	312.494	122.034	11	1.98101	2	good
AAGGTACCTGG	MS157	1361309	258.558	222	0.310428	0.0688778	1.96076	1.95403	-8.81634	0.404124	0.252	0.067668	38.4147	15.1901	0	1.9472	2	good
AAGGTACCTGG	MS81	4032651	765.936	564	0.705602	0.119874	1.99683	1.9942	-11.7257	0.100993	0.669867	0.0530709	897.988	319.02	24	1.9472	2	bad
AAGGTACCTGG	NZ169	3827337	726.94	537	0.376052	0.208146	2.6851	2.67271	-10.328	0.715923	0.483993	0.885942	275.505	81.476	0	2.68927	2	good
AAGGTACCTGG	NZ170	2230303	423.609	120	0.888207	0.184685	4.00862	3.96456	-40.8203	0.354151	1.80417	1.15679	468.507	197.197	45	2.41709	1	bad
AAGGTACCTGG	NZ186	2044761	388.369	29	1.39549	0.15081	6.79791	6.86413	2.78584	0.323966	0.804457	1.57562	274.504	90.3867	0	5.97265	2	bad
AAGGTACCTGG	NZ250	50767	9.64236	2	1.31422	0.162018	2.54945	2.5612	-32.8558	0.196701	1.86448	0.18075	736.866	331.392	4	1.60266	1	bad
AAGTCTAGGTG	MS157	919427	174.63	8	0.669568	0.11659	3.90193	3.84796	-8.15217	0.502845	2.66768	-0.435069	496.512	216.644	2	1.79658	0	bad
AAGTCTAGGTG	MS81	158902	30.1808	11	1.38162	0.0622612	2.00072	2.02689	-21.5472	0.0611646	0.588803	0.0652039	858.39	308.379	7	1.96733	2	bad
AAGTCTAGGTG	NZ169	1111839	211.175	11	1.59533	0.178854	8.11929	8.16185	12.2462	0.133668	1.20133	0.435037	146.801	46.7457	32	4.82412	2	bad
AAGTCTAGGTG	NZ170	1487418	282.511	225	0.353771	0.0924989	2.40839	2.40077	-16.1085	0.673363	0.420122	0.727889	223.175	67.5333	23	2.42982	2	good
AAGTCTAGGTG	NZ186	2004309	380.685	315	0.333152	0.0830031	1.90012	1.93112	-9.59209	0.521007	0.299616	0.0584109	113.022	42.5423	2	1.917	2	good
AAGTCTAGGTG	NZ250	57316	10.8862	3	1.24981	0.153569	2.2962	2.29379	-18.6892	0.252209	1.55184	-0.0713868	1043.97	500.326	2	1.69079	1	bad
AAGTCTGATAC	MS157	2432702	462.052	9	1.32005	0.100587	9.26181	9.29454	20.6246	0.377604	1.40992	3.03154	192.897	88.5896	14	5.14701	1	bad
AAGTCTGATAC	MS81	2583820	490.754	418	0.292624	0.0891164	2.03133	2.04288	-13.1654	0.47691	0.262028	0.0667455	154.776	57.3985	0	2.00608	2	good
AAGTCTGATAC	NZ169	3892313	739.281	22	0.422689	0.0461474	1.06583	1.06012	2.04931	0.899926	0.69981	0.399991	1902.64	2129.75	2	1.62317	0	bad
AAGTCTGATAC	NZ170	407037	77.31	17	1.5564	0.137614	2.51596	2.517	7.78561	0.100604	0.560482	0.366838	496.475	157.086	9	2.37835	2	bad
AAGTCTGATAC	NZ186	2689908	510.904	421	0.345376	0.057154	1.95302	1.95342	-13.2296	0.407262	0.265817	0.0647013	143.603	53.4992	28	1.9491	2	good
AAGTCTGATAC	NZ250	4049536	769.143	674	0.321672	0.062703	1.99155	1.99234	-9.84359	0.262902	0.234596	-0.000761492	59.8698	22.9078	5	1.99905	2	good
AATACCGACCG	MS157	82250	15.622	5	1.45384	0.183265	3.2628	3.25576	-3.51172	0.110997	0.990874	0.0460339	606.821	184.23	3	2.43628	2	bad
AATACCGACCG	MS81	2098045	398.489	15	1.16517	0.0734261	2.70054	2.72264	15.2324	0.23335	0.513504	16.6891	788.514	410.49	0	5.15499	1	bad
AATACCGACCG	NZ169	3444781	654.279	512	0.378744	0.163033	1.63767	1.61081	-16.5315	0.686816	0.525764	0.125497	552.907	226.281	0	1.63685	1	good
AATACCGACCG	NZ170	1646003	312.631	241	0.384679	0.0769052	2.24959	2.22731	-20.673	0.627909	0.43181	0.676103	264.955	85.4836	74	2.27028	2	good
AATACCGACCG	NZ186	1208119	229.462	19	1.78819	0.10244	2.18747	2.18801	5.12899	0.0914054	0.605751	0.060293	690.045	247.715	5	1.9472	2	bad
AATACCGACCG	NZ250	27054	5.13846	2	1.06964	0.133442	5.3979	5.40652	-112.785	0.191559	1.44204	0.336876	465.136	115.546	2	4.17968	3	bad
AATCGCTCCGC	MS157	1716888	326.095	274	0.333687	0.0778452	1.96656	1.97618	-7.60176	0.435166	0.276115	0.0732526	81.429	31.4204	0	1.95442	2	good
AATCGCTCCGC	MS81	6312703	1198.99	1040	0.368766	0.156159	2.31335	2.30865	-17.8997	0.457784	0.39388	0.0784784	348.246	114.777	0	2.30902	2	good
AATCGCTCCGC	NZ169	79939	15.1831	13	0.511915	0.117429	1.96459	2.00217	-8.45352	0.127097	0.467642	0.141371	727.133	266.113	9	2.02659	2	good
AATCGCTCCGC	NZ170	1853069	351.96	262	0.38004	0.119991	2.1564	2.12592	-20.7556	0.632057	0.426383	0.650992	257.453	91.6122	10	2.18291	2	good
AATCGCTCCGC	NZ186	2920657	554.731	475	0.364943	0.184727	3.60475	3.61608	-4.51055	0.653508	0.49874	0.0974049	176.643	47.9764	4	3.42697	3	bad
AATCGCTCCGC	NZ250	39514	7.50503	4	1.18239	0.167486	4.2623	4.27439	-7.97342	0.154394	1.26132	0.0129892	518.992	118.624	1	3.69364	3	bad
AATGAGGTGGC	MS157	1458677	277.052	146	0.826106	0.137305	6.64433	6.65504	-9.56579	0.424302	1.51435	0.559318	341.704	61.4905	16	5.17531	6	bad
AATGAGGTGGC	MS81	5083750	965.575	834	0.312156	0.0929173	1.97682	1.99044	-10.9639	0.507861	0.294509	0.064978	146.653	56.0401	29	1.94587	2	good
AATGAGGTGGC	NZ169	4977073	945.313	21	0.591983	0.0446356	0.878205	0.876937	3.33574	0.760809	0.538098	0.0948497	2169.89	2381.92	19	1.61235	0	bad
AATGAGGTGGC	NZ170	2341101	444.654	28	0.508975	0.0875441	1.71257	1.67384	3.36455	0.818211	0.977279	0.496379	1074.98	1089.67	1	1.7339	0	bad
AATGAGGTGGC	NZ186	2345587	445.506	379	0.305599	0.0494935	1.97832	1.96666	-7.09137	0.451565	0.228859	0.0602922	19.3132	7.54946	2	1.94663	2	good
AATGAGGTGGC	NZ250	42092	7.99468	2	1.39604	0.205755	2.55199	2.59732	65.1468	0.184817	1.83792	0.221401	923.305	423.364	4	1.39563	1	bad
AATGCGCGCAC	MS157	2377292	451.527	389	0.311463	0.0483529	1.9803	1.96949	-6.79866	0.457264	0.24723	0.0717287	41.081	16.0658	5	1.93903	2	good
AATGCGCGCAC	MS81	405919	77.0976	25	1.39291	0.0731704	2.01238	2.0168	9.17027	0.041586	0.416077	0.0530709	446.702	167.544	0	1.9472	2	good
AATGCGCGCAC	NZ169	99902	18.9747	11	0.655252	0.119458	2.09478	2.13477	-18.6454	0.23875	0.510105	1.29334	920.793	316.667	1	2.56524	2	bad
AATGCGCGCAC	NZ170	2204012	418.616	318	0.375547	0.105048	2.18831	2.22545	-16.3385	0.65631	0.419072	0.641066	240.867	82.6875	19	2.22868	2	good
AATGCGCGCAC	NZ186	3222822	612.122	471	0.38832	0.180305	2.44973	2.4334	-5.62971	0.69494	0.453401	0.0448092	198.016	66.1784	12	2.32953	3	good
AATGCGCGCAC	NZ250	49814	9.46135	6	0.881379	0.154331	5.77602	5.79429	-3.99891	0.133982	0.707681	0.325552	404.406	66.175	10	5.19145	5	bad
AATGTAAGGCG	MS157	1502015	285.283	252	0.310784	0.0351297	1.96495	1.95954	-7.52564	0.434481	0.256873	0.0754459	58.3169	22.6718	13	1.94131	2	good
AATGTAAGGCG	MS81	6069488	1152.8	936	0.3483	0.167842	1.80226	1.83266	-7.34458	0.691917	0.395816	0.0539768	327.981	137.11	20	1.76543	2	good
AATGTAAGGCG	NZ169	65407	12.423	10	0.689941	0.120609	1.96135	1.98218	-6.15538	0.0849162	0.559069	0.0514064	873.316	314.913	19	1.96733	2	bad
AATGTAAGGCG	NZ170	680585	129.266	11	1.63277	0.210141	3.53462	3.53672	6.77571	0.115304	0.872446	0.227078	455.928	135.777	12	2.59943	2	bad
AATGTAAGGCG	NZ186	780395	148.223	21	1.65296	0.0816892	4.49915	4.48954	4.31314	0.0934697	0.574562	0.175738	297.87	60.8999	25	3.99202	4	bad
AATGTAAGGCG	NZ250	50588	9.60836	4	1.30015	0.170893	2.51182	2.48316	-4.29783	0.0606143	0.964158	0.0591401	865.301	304.968	0	1.9867	2	bad
AATGTCTCACA	MS157	58601	11.1303	4	1.55025	0.123583	2.28205	2.33476	-5.34047	0.0435652	0.987512	0.0677424	925.643	335.722	9	1.93466	2	bad
AATGTCTCACA	MS81	2087755	396.535	301	0.363393	0.157073	3.16018	3.13647	-10.1873	0.674402	0.412499	0.11034	136.416	33.9483	0	3.07236	3	good
AATGTCTCACA	NZ169	2828325	537.194	13	0.838278	0.0684633	1.04265	1.01755	4.59085	0.382981	0.702272	3.70358	1990.01	2092.83	6	1.42868	0	bad
AATGTCTCACA	NZ170	1077088	204.575	160	0.364163	0.144672	5.16586	5.18628	-18.1931	0.668971	0.466733	1.3494	95.0668	15.7669	11	5.268	5	bad
AATGTCTCACA	NZ186	1884437	357.918	17	1.50874	0.0568918	2.10261	2.11019	5.0956	0.323463	0.471529	5.00941	978.935	533.563	10	4.26838	1	bad
AATGTCTCACA	NZ250	2046859	388.767	302	0.364567	0.0942964	1.98325	2.01015	-13.9597	0.666114	0.392545	0.195123	174.548	62.0875	1	2.00741	2	good
AATTAAGCCTG	MS157	1862034	353.663	281	0.436605	0.208333	1.87785	1.87363	-5.76555	0.380009	0.489081	0.0757089	692.757	271.511	12	1.88737	2	good
AATTAAGCCTG	MS81	279367	53.0612	22	1.23888	0.167934	4.48674	4.47334	10.0998	0.136934	0.51534	0.0872556	232.708	43.4652	9	4.32498	4	bad
AATTAAGCCTG	NZ169	4935479	937.413	799	0.382434	0.126555	1.36643	1.40093	-12.3358	0.926833	1.09324	-0.0114062	1499.65	442.659	4	1.78557	2	bad
AATTAAGCCTG	NZ170	993751	188.747	21	1.47105	0.124543	2.79758	2.7778	10.551	0.216375	1.25366	0.0842582	542.336	255.679	2	1.42526	1	bad
AATTAAGCCTG	NZ186	2618448	497.331	413	0.334701	0.179512	5.14452	5.16216	-5.31776	0.867567	0.504214	0.415173	53.0466	8.97647	11	4.89782	5	bad
AATTAAGCCTG	NZ250	20966	3.98215	2	1.24077	0.180474	4.75902	4.7771	-39.5882	0.0456383	1.30157	0.211431	473.976	89.6986	29	4.30104	4	bad
ACAATCTGCGC	MS157	127898	24.2921	11	1.21464	0.114426	1.99374	2.04314	-10.2118	0.0809959	0.534817	0.0732545	882.811	326.333	4	1.96733	2	bad
ACAATCTGCGC	MS81	4748551	901.909	342	1.24241	0.135993	5.61652	5.61429	-29.23	0.0754222	1.60678	0.160503	414.277	94.9842	0	3.50446	4	bad
ACAATCTGCGC	NZ169	65042	12.3537	10	0.571262	0.169292	1.97873	1.97017	-6.43041	0.0921898	0.529902	0.184069	843.589	306.74	9	1.98841	2	good
ACAATCTGCGC	NZ170	2135161	405.539	279	0.3948	0.142151	3.29969	3.31091	-5.36087	0.836536	0.628952	0.713914	200.141	51.582	9	3.16239	2	bad
ACAATCTGCGC	NZ186	733902	139.393	31	1.44396	0.121075	2.22234	2.2385	4.52674	0.16054	0.550257	0.204636	726.466	263.565	42	2.36581	2	bad
ACAATCTGCGC	NZ250	55399	10.5221	6	0.999549	0.181981	3.10645	3.0685	-4.50927	0.100154	0.654211	0.092126	554.876	149.831	4	2.95802	3	bad
ACACATAGGTT	MS157	1768731	335.941	299	0.311841	0.0447999	1.99138	2.01862	-8.24333	0.472723	0.281584	0.0719482	83.4055	32.0377	2	2.01216	2	good
ACACATAGGTT	MS81	5525077	1049.4	931	0.317122	0.0725	1.89617	1.93648	-7.3263	0.576781	0.30861	0.0521937	170.194	68.9619	0	1.86496	2	good
ACACATAGGTT	NZ169	70291	13.3506	10	0.736111	0.0908439	1.96764	1.96459	-6.52486	0.0669981	0.509182	0.0701378	778.655	282.367	0	2.01462	2	bad
ACACATAGGTT	NZ170	1086434	206.35	18	1.4038	0.11608	8.83679	8.87008	10.1658	0.25165	1.2413	1.84913	167.017	39.0566	28	5.19753	2	bad
ACACATAGGTT	NZ186	2771284	526.36	429	0.341022	0.0482722	1.96455	1.96147	-7.68546	0.416723	0.258907	0.060293	69.0043	27.0748	3	1.9472	2	good
ACACATAGGTT	NZ250	67349	12.7918	8	0.912812	0.0908151	2.07344	2.10138	-5.42397	0.128625	0.669373	0.0388956	898.131	326.835	12	1.96125	2	bad
ACACCAAGAGC	MS157	2047582	388.904	318	0.392789	0.0900671	1.66662	1.65639	-7.18754	0.67321	0.472592	0.0592703	464.487	192.452	7	1.63685	2	good
ACACCAAGAGC	MS81	139002	26.4011	21	0.589351	0.146559	2.1265	2.13416	-57.7467	0.149254	0.476457	0.0156763	642.069	216.76	0	2.14511	2	bad
ACACCAAGAGC	NZ169	651221	123.689	11	1.71169	0.204966	4.50333	4.5268	9.00315	0.0898234	0.806226	0.644339	329.077	76.5917	65	3.50294	3	bad
ACACCAAGAGC	NZ170	581615	110.468	10	1.77204	0.211847	2.37397	2.32907	26.0427	0.0768291	0.693032	0.317007	757.75	256.77	4	2.13561	2	bad
ACACCAAGAGC	NZ186	3701148	702.972	30	1.3056	0.199947	1.54561	1.43031	2.55295	0.413777	0.825983	-0.382925	1239.86	1200.53	66	1.45812	0	bad
ACACCAAGAGC	NZ250	46736	8.87673	4	1.0781	0.210275	4.8777	4.82441	-5.48559	0.245582	1.16329	0.194137	421.219	117.522	2	3.97607	3	bad
ACACGATCAAG	MS157	1347169	255.873	218	0.323474	0.0511291	1.98021	1.97819	-7.36793	0.447634	0.270857	0.067668	64.2639	24.7881	0	1.9472	2	good
ACACGATCAAG	MS81	2004017	380.63	312	0.33589	0.133907	1.9614	1.96083	-18.7493	0.381047	0.300712	0.0530709	247.286	93.6556	2	1.9472	2	good
ACACGATCAAG	NZ169	2401209	456.07	365	0.343173	0.0569591	2.20287	2.20359	-24.5229	0.679491	0.407513	0.590594	229.964	81.8426	0	2.24084	2	good
ACACGATCAAG	NZ170	373402	70.9216	12	1.63635	0.205868	7.01556	7.14654	9.14351	0.0623985	0.72939	0.594692	214.668	32.3589	13	6.02564	5	bad
ACACGATCAAG	NZ186	1963638	372.961	44	1.40705	0.133904	4.68951	4.69586	9.3296	0.262013	1.27621	0.187473	230.911	101.239	11	2.45603	1	bad
ACACGATCAAG	NZ250	2617932	497.233	329	0.532861	0.165805	3.28547	3.28193	-2.69198	0.658715	0.682536	0.384651	419.877	132.904	38	2.67635	3	bad
ACATGTCTTAC	MS157	24379	4.63039	4	0.80557	0.106574	2.05889	2.0175	-4.0234	0.0621636	0.818271	0.067668	1056.41	369.183	1	1.9472	2	bad
ACATGTCTTAC	MS81	23252	4.41633	3	0.908094	0.1809	5.28588	5.26537	-5.54186	0.0290335	0.863424	0.138136	408.99	67.377	11	5.26572	6	bad
ACATGTCTTAC	NZ169	17903	3.40038	2	1.02564	0.122501	6.13794	6.1503	31.9633	0.187299	1.5419	4.68908	365.743	116.883	1	4.01766	3	bad
ACATGTCTTAC	NZ170	124385	23.6249	18	0.487712	0.0955578	2.3751	2.35805	-7.94608	0.312216	0.545653	0.744434	617.433	195.75	14	2.39126	2	good
ACATGTCTTAC	NZ186	128612	24.4277	20	0.495576	0.0776165	1.94092	1.94861	-11.0253	0.187342	0.45066	0.0866676	678.72	252.403	2	1.96714	2	bad
ACATGTCTTAC	NZ250	19700	3.74169	2	1.08102	0.136276	2.62427	2.60409	-26.1722	0.036481	1.43889	0.153287	793.299	264.34	3	2.07977	2	bad
ACCAAGATCAA	MS157	1877991	356.693	297	0.359574	0.104643	1.96221	1.95394	-8.37689	0.498802	0.338217	0.079829	279.891	105.813	4	1.94188	2	good
ACCAAGATCAA	MS81	213131	40.4807	20	1.15086	0.0832481	1.97467	2.00214	55.1577	0.0893078	0.460341	0.0652039	600.296	222.015	7	1.96733	2	good
ACCAAGATCAA	NZ169	62273	11.8277	9	0.686815	0.0911251	2.13832	2.14881	-7.85364	0.0933397	0.580324	0.254641	894.517	314.276	4	2.11016	2	bad
ACCAAGATCAA	NZ170	433118	82.2636	8	1.79544	0.16297	4.26839	4.28026	-34.3777	0.0290077	0.674335	0.356544	392.737	80.4977	0	4.0169	4	bad
ACCAAGATCAA	NZ186	2980292	566.057	424	0.377359	0.0872785	1.91853	1.94865	-5.17449	0.616054	0.290887	0.0646555	104.574	42.4426	29	1.87787	2	good
ACCAAGATCAA	NZ250	4338788	824.081	644	0.375628	0.0712247	2.01629	2.00884	-14.223	0.63803	0.428245	0.205026	185.091	67.0392	0	2.02773	2	good
ACCACGACTTG	MS157	1976998	375.498	314	0.337146	0.212222	4.7003	4.67296	-10.0192	0.620462	0.39315	0.176842	73.8514	14.0879	5	4.67711	4	bad
ACCACGACTTG	MS81	157403	29.8961	19	0.831274	0.164623	1.98815	1.99789	3194.66	0.146736	0.472497	0.0660548	618.51	221.508	3	2.00608	2	good
ACCACGACTTG	NZ169	61266	11.6365	9	0.66066	0.133056	2.19838	2.19384	-7.34019	0.134676	0.603918	0.187146	842.998	289.541	2	2.13941	2	bad
ACCACGACTTG	NZ170	2458278	466.909	359	0.392753	0.167038	2.6747	2.65523	-10.7049	0.448011	0.371598	-0.00298586	188.983	59.3806	73	2.67142	3	good
ACCACGACTTG	NZ186	3640756	691.502	591	0.424628	0.130749	2.23504	2.28572	-3.7967	0.518793	0.522323	0.0654913	605.851	225.302	54	2.19107	2	bad
ACCACGACTTG	NZ250	5341276	1014.49	580	0.608988	0.184788	5.48824	5.49388	-6.40251	0.457149	0.690803	0.689627	351.399	63.0498	28	5.45489	5	bad
ACCATACTGAC	MS157	1905288	361.878	317	0.328336	0.0636578	1.85663	1.85422	-6.00908	0.740042	0.345662	0.0771667	124.025	50.5608	0	1.79316	2	good
ACCATACTGAC	MS81	206031	39.1322	14	1.35376	0.110542	2.00159	2.02577	309.491	0.0324739	0.522758	0.0652039	762.939	283.163	0	1.96733	2	bad
ACCATACTGAC	NZ169	51205	9.72555	8	0.631559	0.055667	1.98069	1.99741	-5.43194	0.0750076	0.601987	0.15958	956.746	344.003	4	2.02051	2	bad
ACCATACTGAC	NZ170	435611	82.7371	10	1.70219	0.111074	3.18469	3.16286	12.0552	0.0855562	0.849104	0.187364	473.87	150.303	16	2.35651	2	bad
ACCATACTGAC	NZ186	102899	19.544	16	0.548499	0.0755758	1.98432	1.97904	-11.1744	0.0996537	0.444118	0.0652093	636.457	231.245	2	1.98424	2	good
ACCATACTGAC	NZ250	4501187	854.926	714	0.324732	0.0783721	1.99768	2.01733	-14.361	0.693599	0.376676	0.200753	136.937	50.5085	0	2.00304	2	good
ACCGAGCGTCT	MS157	2292415	435.406	384	0.302116	0.0820158	1.95656	1.96013	-7.29509	0.459509	0.254848	0.0741013	60.2239	24.1752	1	1.94606	2	good
ACCGAGCGTCT	MS81	204940	38.925	25	0.778047	0.144336	1.93687	2.0028	27.5137	0.201391	0.401461	-0.0601381	532.232	198.714	0	2.07825	2	bad
ACCGAGCGTCT	NZ169	4634857	880.315	20	0.750314	0.0499045	0.770736	0.774036	4.44064	0.585444	0.482779	0.582157	2411.14	2598.29	1	1.55442	0	bad
ACCGAGCGTCT	NZ170	3075825	584.202	468	0.355903	0.203569	4.93276	4.93084	-6.34846	0.788071	0.48	1.39201	86.2116	15.5909	15	4.80342	5	bad
ACCGAGCGTCT	NZ186	3684752	699.858	632	0.268402	0.0524321	1.96892	1.9655	-6.73308	0.435391	0.209064	0.0603697	5.53306	2.12768	1	1.94606	2	good
ACCGAGCGTCT	NZ250	6126230	1163.58	502	1.14536	0.148051	6.17145	6.14883	-15.6045	0.251298	1.96042	0.147453	317.358	83.7965	5	3.51852	3	bad
ACCGGAACCTC	MS157	1702925	323.443	143	0.889088	0.11241	8.98384	9.06759	-5.07504	0.341968	2.17817	0.438432	200.046	58.9324	40	4.77797	1	bad
ACCGGAACCTC	MS81	207010	39.3181	18	1.16951	0.147565	2.01664	2.02393	-274.262	0.13243	0.446909	0.0672334	741.549	277.933	0	1.99943	2	bad
ACCGGAACCTC	NZ169	62383	11.8486	9	0.647805	0.187091	2.04726	2.08247	-6.60782	0.094648	0.555014	0.173893	865.713	312.431	35	2.07464	2	bad
ACCGGAACCTC	NZ170	401869	76.3284	11	1.62293	0.186372	4.89013	4.82079	10.1866	0.0976707	0.741532	0.489303	350.189	76.134	18	3.89307	4	bad
ACCGGAACCTC	NZ186	2208066	419.386	365	0.286671	0.189611	3.95152	3.97089	-17.2855	0.564689	0.300684	0.0846172	16.8804	3.44555	1	4.02469	4	bad
ACCGGAACCTC	NZ250	47421	9.00684	4	1.05805	0.159184	5.60431	5.60519	-3.77315	0.187383	0.965625	0.0184815	274.101	52.905	42	4.48794	4	bad
ACCGTGCACTG	MS157	1690148	321.016	281	0.32472	0.0484139	1.88674	1.90706	-7.38868	0.447409	0.301047	0.0640067	118.65	48.7979	2	1.91339	2	good
ACCGTGCACTG	MS81	3057253	580.675	508	0.299301	0.105008	1.91327	1.95232	-13.5614	0.463086	0.276685	0.0542667	110.949	44.4259	1	1.92612	2	good
ACCGTGCACTG	NZ169	64310	12.2146	9	0.655823	0.216887	4.08302	4.07949	-6.85968	0.148781	0.587603	0.465914	470.005	95.3087	2	4.05945	4	bad
ACCGTGCACTG	NZ170	1846268	350.668	289	0.603518	0.119698	1.99621	1.99708	-11.7023	0.0764215	0.581824	0.0674961	870.847	315.686	91	2.01709	2	good
ACCGTGCACTG	NZ186	1477352	280.599	20	1.71802	0.155579	3.20101	3.21705	3.7971	0.125593	0.537996	0.0793415	382.954	103.805	7	2.90864	3	bad
ACCGTGCACTG	NZ250	46748	8.87901	4	1.2146	0.133668	2.31317	2.33013	-3.33714	0.0771941	0.788824	0.0564589	903.517	323.56	0	1.96733	2	bad
ACCTTCGGATA	MS157	83420	15.8443	3	1.69193	0.136839	2.5294	2.57157	-4.87564	0.0489149	1.0461	0.0803575	793.526	278.29	2	1.99582	2	bad
ACCTTCGGATA	MS81	188904	35.8792	19	1.00672	0.125215	2.02116	2.04301	169.39	0.184465	0.480223	0.0583934	738.177	265.108	10	2.05755	2	bad
ACCTTCGGATA	NZ169	98522	18.7126	10	0.973204	0.173604	2.32488	2.36219	-9.75339	0.13069	0.719315	0.0904291	746.413	258.22	1	2.0925	2	bad
ACCTTCGGATA	NZ170	2336385	443.758	13	0.603532	0.0455473	0.968274	0.955685	3.56679	0.658216	0.665039	-0.111339	2076.16	2301.3	13	1.46325	0	bad
ACCTTCGGATA	NZ186	2787215	529.386	68	1.22418	0.171874	4.05103	4.07236	14.515	0.302702	1.79261	0.0940598	437.08	208.127	1	1.96144	1	bad
ACCTTCGGATA	NZ250	31568	5.99582	2	0.943614	0.168004	3.99025	4.03036	-38.3589	0.299185	1.6731	0.112303	719.471	298.267	3	2.67692	2	bad
ACGAGGTACAG	MS157	1392339	264.452	220	0.324889	0.125248	3.37178	3.38098	-12.676	0.479829	0.315498	0.0900381	36.2278	8.75915	1	3.4095	3	good
ACGAGGTACAG	MS81	4590904	871.967	742	0.342082	0.115028	2.03526	2.03578	-11.7789	0.494564	0.322724	0.0579937	272.314	99.4525	0	1.99886	2	good
ACGAGGTACAG	NZ169	2955877	561.42	16	0.771757	0.0539412	1.037	1.04645	3.4975	0.47401	0.64879	-0.121777	1833.52	2048.4	0	1.54663	0	bad
ACGAGGTACAG	NZ170	1691134	321.203	250	0.372154	0.105462	2.18023	2.20485	-17.6576	0.617947	0.403523	0.562164	186.944	63.9796	16	2.20969	2	good
ACGAGGTACAG	NZ186	2371220	450.374	404	0.271045	0.049117	1.89058	1.8986	-6.58301	0.599426	0.258426	0.0693008	27.8601	11.0089	28	1.85242	2	good
ACGAGGTACAG	NZ250	41453	7.87331	4	1.04661	0.164426	4.85495	4.79225	-3.40062	0.112122	0.835921	0.193681	420.918	85.6375	24	4.02336	4	bad
ACGAGTCTGGA	MS157	1375556	261.264	76	0.92157	0.111269	7.87506	7.87242	-7.58614	0.401304	2.49971	0.333694	293.872	84.3403	15	3.55594	2	bad
ACGAGTCTGGA	MS81	83298	15.8211	13	0.509916	0.212413	2.03791	2.05094	-7.26656	0.104747	0.491863	0.0820341	730.376	259.384	0	2.05793	2	bad
ACGAGTCTGGA	NZ169	53690	10.1975	7	0.86884	0.17334	2.10796	2.1147	-4.68109	0.101182	0.620003	0.108443	895.715	306.037	2	2.11947	2	bad
ACGAGTCTGGA	NZ170	1109862	210.8	14	1.51686	0.135661	3.89733	3.90602	11.2125	0.194229	1.17985	0.431298	349.249	170.865	11	2.25223	1	bad
ACGAGTCTGGA	NZ186	3047480	578.819	456	0.435668	0.238606	4.59914	4.56537	-5.43259	0.477504	0.48441	0.102083	220.843	42.7338	0	4.50294	4	bad
ACGAGTCTGGA	NZ250	4092644	777.33	600	0.545805	0.202391	5.97966	6.05605	-5.54559	0.418686	0.664704	0.151803	350.224	53.412	2	6.06078	6	bad
ACGATTGCACC	MS157	5631	1.06952	0	1.36992	0.0504688	3.13103	3.13448	15.2885	0.024886	0.716991	0.00749938	540.928	169.206	4	2.14948	2	bad
ACGATTGCACC	MS81	30258	5.74701	3	1.10364	0.117449	2.28068	2.30928	-9.40511	0.0426269	1.2829	0.0531468	995.376	352.394	1	1.93542	2	bad
ACGATTGCACC	NZ169	16176	3.07236	0	1.20227	0.158602	7.07694	7.01934	34.949	0.379343	1.71507	0.369575	221.524	37.4806	24	4.73333	1	bad
ACGATTGCACC	NZ170	26602	5.05261	4	0.742876	0.181763	4.38229	4.35207	-5.25655	0.214466	0.926742	1.14274	512.383	102.856	2	4.33371	4	bad
ACGATTGCACC	NZ186	25746	4.89003	4	0.848559	0.13991	3.41418	3.42267	-3.56047	0.0864398	0.812895	0.0990974	590.019	149.545	4	3.13314	3	bad
ACGATTGCACC	NZ250	8296	1.57569	0	1.60415	0.0198187	2.76413	2.76346	2.96755	0.103827	0.186916	0	37.1641	11.2767	4	2	2	bad
ACGCAGAATTA	MS157	1250044	237.425	207	0.328952	0.0427476	1.94119	1.94661	-8.31632	0.413483	0.284067	0.0732504	125.006	47.7802	0	1.95252	2	good
ACGCAGAATTA	MS81	3940180	748.372	596	0.348072	0.137557	1.93562	1.98708	-23.8203	0.393456	0.307279	0.0373999	291.555	109.66	0	1.98139	2	good
ACGCAGAATTA	NZ169	51151	9.71529	7	0.744326	0.185773	3.74803	3.74746	-5.33285	0.119238	0.670985	0.335494	528.746	118.824	3	3.6057	4	bad
ACGCAGAATTA	NZ170	1805486	342.922	234	0.408755	0.107849	2.21983	2.21285	-24.6012	0.639256	0.457411	0.650947	324.332	106.161	48	2.23039	2	good
ACGCAGAATTA	NZ186	2453590	466.019	389	0.327799	0.120994	5.02481	5.03765	-3.86567	0.882088	0.639377	0.317741	77.39	13.956	2	4.60057	3	bad
ACGCAGAATTA	NZ250	47914	9.10047	6	1.02173	0.228643	2.28596	2.3034	-3.93879	0.13883	0.825157	0.0794759	807.588	284.848	1	2.01937	2	bad
ACGCTGCGATC	MS157	1506370	286.11	209	0.599256	0.124974	4.19127	4.15042	-6.10566	0.541438	0.96621	0.181725	573.234	124.877	2	4.27654	5	bad
ACGCTGCGATC	MS81	804547	152.81	112	0.381267	0.0691989	1.94921	1.94965	-16.5569	0.295017	0.303036	0.0530709	276.367	104.704	3	1.9472	2	good
ACGCTGCGATC	NZ169	129067	24.5142	9	0.833234	0.0584569	1.10535	1.10226	-21.811	0.308081	0.584254	0.333855	1712.3	920.565	47	1.48205	1	bad
ACGCTGCGATC	NZ170	286011	54.3231	15	1.4861	0.0881113	1.99822	2.03096	36.3959	0.0500955	0.476177	0.0670926	606.159	220.327	1	2.01614	2	bad
ACGCTGCGATC	NZ186	2517113	478.084	415	0.288132	0.0290657	1.97169	1.96127	-6.79451	0.453187	0.223224	0.0645438	13.1854	5.12455	16	1.9396	2	good
ACGCTGCGATC	NZ250	45144	8.57436	2	1.42313	0.181297	5.69249	5.69246	-42.2785	0.161587	1.59604	0.278417	414.416	99.0479	0	3.94131	4	bad
ACGCTTCACAT	MS157	1594874	302.92	274	0.310184	0.139942	1.91244	1.95254	-9.31921	0.511201	0.31316	0.0653239	160.189	62.52	16	1.93181	2	good
ACGCTTCACAT	MS81	157668	29.9464	19	0.829141	0.138335	1.9633	1.99756	-38.4887	0.17138	0.431567	0.01823	631.787	240.092	9	1.97417	2	bad
ACGCTTCACAT	NZ169	3319405	630.466	15	1.03406	0.0955361	0.793023	0.81569	7.22295	0.544707	0.477548	0.85818	2341.26	2463.3	0	1.55252	0	bad
ACGCTTCACAT	NZ170	1839328	349.35	275	0.36991	0.0721776	1.97398	1.96936	-12.9786	0.217558	0.264484	0.00497184	119.617	45.9623	13	1.99411	2	good
ACGCTTCACAT	NZ186	2501032	475.03	361	0.369975	0.047726	1.7985	1.80898	-9.73797	0.514036	0.341407	0.0779463	197.21	78.7483	4	1.81766	2	good
ACGCTTCACAT	NZ250	31107	5.90826	4	1.14289	0.157165	5.60046	5.62003	-4.59316	0.103399	0.918124	0.268483	370.655	60.1516	7	5.32821	5	bad
ACGTGTTAATC	MS157	1407549	267.341	180	0.719615	0.20963	2.28892	2.27616	-6.87923	0.427207	1.2814	0.139584	947.169	309.26	18	2.22222	2	bad
ACGTGTTAATC	MS81	4032284	765.866	630	0.420183	0.172949	5.24552	5.23524	-14.5197	0.390485	0.436274	0.155242	196.944	32.71	2	5.19696	5	bad
ACGTGTTAATC	NZ169	3141222	596.623	352	0.551258	0.161576	1.73748	1.72269	-12.0078	0.497089	0.642007	0.440413	1064.32	436.467	7	1.7491	2	good
ACGTGTTAATC	NZ170	1639277	311.354	249	0.370582	0.120094	2.2961	2.33318	-11.7838	0.684109	0.435643	0.605602	223.832	73.3855	12	2.32498	2	good
ACGTGTTAATC	NZ186	2104638	399.741	360	0.275512	0.0625726	1.97471	1.98221	-7.20002	0.462571	0.228452	0.060293	38.1684	14.93	17	1.9472	2	good
ACGTGTTAATC	NZ250	114457	21.7392	14	0.775261	0.133517	3.67396	3.65444	-8.88236	0.259562	0.64549	0.261246	438.057	104.718	0	3.44539	3	bad
ACTAATCGACG	MS157	987784	187.613	161	0.333316	0.02978	1.96106	1.96571	-8.74211	0.400809	0.279	0.067668	131.179	50.5652	4	1.9472	2	good
ACTAATCGACG	MS81	225199	42.7728	17	1.30048	0.142876	1.97263	1.96216	471.14	0.108436	0.480495	0.052815	737.252	272.156	4	1.94416	2	bad
ACTAATCGACG	NZ169	4321722	820.84	638	0.350505	0.11346	1.67353	1.61357	-3.33222	0.892505	0.600975	0.267851	314.65	138.772	3	1.4416	1	good
ACTAATCGACG	NZ170	534741	101.565	10	1.48529	0.120484	1.86984	1.922	12.0459	0.152987	0.722313	1.56258	1183.61	632.396	15	2.43134	1	bad
ACTAATCGACG	NZ186	2909510	552.613	28	1.35717	0.136803	4.78556	4.82801	3.33843	0.34084	0.952987	0.645282	267.242	138.176	58	3.67787	1	bad
ACTAATCGACG	NZ250	3764500	715.005	605	0.342891	0.0691167	1.98911	1.99148	-9.95174	0.282672	0.261881	0.00335721	89.8582	33.8149	0	1.99411	2	good
ACTCGGTTGTA	MS157	536606	101.919	89	0.342937	0.065321	1.94916	1.93809	-7.33998	0.400207	0.306212	0.0792801	154.622	59.8295	0	1.93143	2	good
ACTCGGTTGTA	MS81	1644433	312.333	272	0.324828	0.120997	1.98139	1.96963	-9.3128	0.453282	0.284587	0.05349	154.743	59.048	4	1.9472	2	good
ACTCGGTTGTA	NZ169	1263988	240.074	187	0.362966	0.125297	2.39486	2.39533	-10.838	0.711727	0.413932	0.652776	172.661	52.5302	31	2.39088	2	good
ACTCGGTTGTA	NZ170	162178	30.803	4	1.77934	0.0829223	4.09743	4.10924	-3.67745	0.110194	0.815572	0.303665	532.772	126.077	12	3.35309	3	bad
ACTCGGTTGTA	NZ186	876578	166.492	149	0.305312	0.107079	1.95719	1.9688	-8.71363	0.424202	0.281872	0.0607513	97.958	39.2997	27	1.95328	2	good
ACTCGGTTGTA	NZ250	11152	2.11814	2	1.19925	0.155333	3.80573	3.77355	-1094.48	0.0350629	1.42728	0.211172	585.894	144.942	30	3.05299	4	bad
ACTGCACAACT	MS157	1464567	278.17	245	0.319099	0.150256	1.86932	1.85804	-8.58836	0.562113	0.336861	0.0784067	196.069	79.2651	12	1.85565	2	good
ACTGCACAACT	MS81	6228671	1183.03	971	0.317152	0.0986829	1.97784	1.96151	-10.5191	0.474359	0.262739	0.0547792	91.6267	34.9997	5	1.93922	2	good
ACTGCACAACT	NZ169	95026	18.0486	13	0.719319	0.159935	2.03937	2.02748	-8.19769	0.096189	0.490432	0.0853259	754.962	268.485	3	2.05527	2	bad
ACTGCACAACT	NZ170	522560	99.2517	13	1.13063	0.0644147	1.25194	1.26767	114.803	0.11253	0.508292	1.47846	1594.66	837.495	0	2.16049	1	bad
ACTGCACAACT	NZ186	3016091	572.857	511	0.275365	0.0320624	1.986	1.99569	-6.6365	0.47148	0.217672	0.0603589	16.3919	6.11229	6	1.94891	2	good
ACTGCACAACT	NZ250	46565	8.84425	4	1.23127	0.116287	3.76653	3.74209	-6.20145	0.149394	1.14807	0.0606419	552.814	152.151	0	2.79069	3	bad
ACTGCTGCTGC	MS157	109335	20.7664	14	0.697233	0.160835	2.16588	2.19682	-10.3515	0.220265	0.610529	0.103193	856.606	287.137	0	2.1113	2	bad
ACTGCTGCTGC	MS81	6166875	1171.3	1041	0.324657	0.19155	1.87219	1.89001	-13.5472	0.551115	0.355228	0.04892	400.843	156.395	4	1.86192	2	good
ACTGCTGCTGC	NZ169	154450	29.3352	20	0.634283	0.176672	5.11363	5.12959	-26.2068	0.243362	0.652535	0.863855	320.249	56.085	20	4.90294	4	bad
ACTGCTGCTGC	NZ170	1708252	324.454	252	0.353356	0.136272	4.1961	4.19653	-7.8084	0.710123	0.405515	1.06311	72.7255	15.1317	14	4.1018	4	bad
ACTGCTGCTGC	NZ186	2616296	496.922	428	0.305249	0.0543767	1.97205	1.97036	-7.18416	0.445599	0.239849	0.0645438	47.6303	18.6022	5	1.9396	2	good
ACTGCTGCTGC	NZ250	79412	15.083	11	0.648794	0.101718	2.14147	2.15947	-8.68269	0.158947	0.593645	0.0523683	860.623	298.888	0	2.25603	2	bad
ACTGGCATCCG	MS157	1852818	351.912	314	0.309213	0.0287728	1.95247	1.94119	-7.76932	0.443801	0.27727	0.0792402	118.944	45.9735	2	1.92915	2	good
ACTGGCATCCG	MS81	4756469	903.413	748	0.347097	0.147197	2.00882	2.03077	-34.1539	0.42055	0.31407	0.0433073	331.33	120.164	5	2.01614	2	good
ACTGGCATCCG	NZ169	92901	17.645	15	0.539747	0.175969	5.61415	5.62785	-11.3155	0.155083	0.50967	0.935492	257.839	40.4039	40	5.67502	6	bad
ACTGGCATCCG	NZ170	2926567	555.853	453	0.346385	0.0833019	2.20925	2.20829	-19.3823	0.644823	0.409753	0.654333	194.261	66.2829	9	2.24577	2	good
ACTGGCATCCG	NZ186	2935551	557.56	437	0.361722	0.0453319	1.79955	1.8081	-10.2379	0.52499	0.352739	0.0818492	204.423	82.4103	0	1.80874	2	good
ACTGGCATCCG	NZ250	49489	9.39962	6	0.727697	0.0994953	6.07893	6.04495	-3.5648	0.271497	0.882014	0.4226	321.954	57.108	12	5.12991	5	bad
ACTGTGAATCC	MS157	1533309	291.227	239	0.330136	0.0428078	1.98005	1.97433	-7.18627	0.43417	0.256425	0.0676022	46.3758	17.8827	2	1.94397	2	good
ACTGTGAATCC	MS81	319822	60.7449	39	0.784052	0.0705404	1.95921	1.97148	605.509	0.204403	0.370838	0.053784	451.752	168.097	5	1.9548	2	bad
ACTGTGAATCC	NZ169	523204	99.374	25	1.43849	0.0761517	5.67808	5.70028	6.01381	0.147608	0.601011	1.06368	182.257	31.9321	3	5.15005	6	bad
ACTGTGAATCC	NZ170	353463	67.1345	17	1.49996	0.12723	4.58812	4.57908	15.5785	0.119126	0.530347	0.616934	290.943	53.9315	47	4.58841	4	bad
ACTGTGAATCC	NZ186	2639060	501.246	423	0.306466	0.0425952	1.9741	1.97817	-6.90672	0.447558	0.235318	0.0603589	42.079	16.4527	3	1.94891	2	good
ACTGTGAATCC	NZ250	3416802	648.965	498	0.408186	0.128304	3.75681	3.76577	-7.72107	0.653132	0.499135	0.408867	162.717	37.5089	18	3.73086	4	bad
AGACTAGTCTA	MS157	148861	28.2737	5	1.5367	0.214946	5.77079	5.76224	-3.26382	0.121325	0.841062	0.130599	307.686	53.5663	0	4.78367	5	bad
AGACTAGTCTA	MS81	3555540	675.316	558	0.336352	0.0936956	1.98831	2.00314	-9.95231	0.46569	0.296074	0.05307	206.412	78.1436	7	1.9529	2	good
AGACTAGTCTA	NZ169	79282	15.0583	10	0.848263	0.0992129	1.95521	2.00269	-6.85261	0.08191	0.533954	0.147422	830.303	294.807	42	2.03172	2	bad
AGACTAGTCTA	NZ170	1761513	334.57	257	0.363964	0.104222	2.2371	2.24385	-22.321	0.656272	0.442293	0.68079	283.049	93.9254	47	2.29554	2	good
AGACTAGTCTA	NZ186	2455574	466.396	361	0.358977	0.0443351	1.95583	1.94965	-8.34844	0.38739	0.274817	0.0646098	122.855	47.5141	0	1.94131	2	good
AGACTAGTCTA	NZ250	3386503	643.21	515	0.340037	0.0827524	1.95873	2.00082	-15.4242	0.667135	0.376079	0.22454	201.833	76.4191	25	2.03096	2	good
AGAGACGACAC	MS157	976586	185.486	155	0.363136	0.0694372	1.75653	1.75328	-7.84102	0.477751	0.38627	0.0677762	339.454	144.991	9	1.74587	2	good
AGAGACGACAC	MS81	828280	157.318	135	0.337033	0.0607158	1.96165	1.96657	-11.0277	0.362793	0.300345	0.0530897	179.42	69.4769	16	1.94891	2	good
AGAGACGACAC	NZ169	1569425	298.086	166	0.958053	0.147859	7.26066	7.21279	-15.8875	0.187476	1.07669	1.69748	308.968	51.5649	92	5.82013	5	bad
AGAGACGACAC	NZ170	1307237	248.288	173	0.351921	0.0971851	1.89927	1.90586	-4.09227	0.795945	0.788763	0.853005	536.868	210.913	0	1.79601	1	good
AGAGACGACAC	NZ186	93861	17.8274	14	0.638583	0.0559196	1.9313	1.9554	-8.79729	0.0859607	0.467396	0.0653403	696.38	263.118	14	1.96733	2	bad
AGAGACGACAC	NZ250	3497566	664.305	153	1.26987	0.163715	6.02842	6.05915	-18.3891	0.263154	2.72645	0.315749	325.408	120.26	17	2.47635	1	bad
AGAGCATTACC	MS157	1113539	211.498	185	0.336168	0.0532324	1.93396	1.93684	-7.91016	0.405472	0.290262	0.067668	117.494	45.1915	35	1.9472	2	good
AGAGCATTACC	MS81	147056	27.9309	15	1.09209	0.0943616	1.98286	1.99638	-19.6732	0.10513	0.498007	0.0651795	779.998	282.255	2	1.96543	2	bad
AGAGCATTACC	NZ169	49393	9.38139	8	0.653028	0.148634	2.03197	2.03478	-5.44195	0.0829949	0.61742	0.182967	965.393	345.116	1	1.9924	2	bad
AGAGCATTACC	NZ170	1575019	299.149	214	0.465135	0.204981	1.8997	1.88488	-7.22708	0.651284	0.671381	0.515934	781.326	302.517	10	1.88547	1	good
AGAGCATTACC	NZ186	2788755	529.678	33	1.45285	0.142009	4.16878	4.17243	10.3409	0.1822	1.43475	0.00747828	227.639	100.495	42	1.8452	1	bad
AGAGCATTACC	NZ250	44955	8.53846	4	1.23288	0.208237	4.01684	4.0325	-3.39361	0.0418197	0.750749	0.140553	443.955	102.631	0	3.50427	4	bad
AGAGCTGGCGA	MS157	246053	46.7337	4	1.57755	0.12449	4.42806	4.39587	-3.05542	0.219025	1.17549	1.7468	438.423	185.533	0	3.18917	1	bad
AGAGCTGGCGA	MS81	4560576	866.206	757	0.30922	0.119928	1.95576	2.01138	-8.35958	0.52893	0.276087	0.0530709	130.476	51.0835	2	1.9472	2	good
AGAGCTGGCGA	NZ169	67457	12.8123	10	0.580651	0.162336	2.03043	2.07914	-6.1725	0.0703324	0.508165	0.160022	805.319	291.279	8	2.07749	2	bad
AGAGCTGGCGA	NZ170	1713023	325.36	260	0.381834	0.0455047	1.97195	1.97835	-16.0694	0.167547	0.289893	0	245.197	94.5484	26	2	2	good
AGAGCTGGCGA	NZ186	2498410	474.532	399	0.324173	0.0874998	1.7117	1.72201	-9.22384	0.56695	0.398103	0.0688506	231.225	100.257	29	1.7736	2	good
AGAGCTGGCGA	NZ250	48264	9.16695	4	1.1688	0.116392	3.24063	3.25984	-3.77004	0.107142	0.995552	0.0613116	436.214	145.581	13	2.20399	2	bad
AGCACTAAGAT	MS157	374916	71.2091	60	0.357256	0.0683523	1.9577	1.95864	-9.07962	0.343143	0.315635	0.0676897	161.699	62.5018	17	1.94568	2	good
AGCACTAAGAT	MS81	1252620	237.915	210	0.335726	0.147854	1.9149	1.96804	-15.2684	0.419122	0.325164	0.0530709	304.484	117.696	2	1.9472	2	good
AGCACTAAGAT	NZ169	16815	3.19373	2	1.05424	0.144298	5.54746	5.57528	-33.6382	0.0694986	1.23399	0.338285	460.705	78.3848	8	5.1472	5	bad
AGCACTAAGAT	NZ170	114670	21.7797	2	1.82288	0.16604	7.13049	7.16772	-21.6708	0.0531658	1.50169	0.466161	317.238	51.4594	0	5.42374	5	bad
AGCACTAAGAT	NZ186	591269	112.302	97	0.315038	0.162233	2.51487	2.5087	-14.8892	0.585375	0.361671	0.110369	111.628	33.7645	33	2.5377	3	good
AGCACTAAGAT	NZ250	16536	3.14074	0	1.51089	0.112066	8.72368	8.69637	17.4233	0.0570174	1.38618	0.241875	178.161	30.579	4	4.86705	4	bad
AGCAGCTAACC	MS157	1587634	301.545	263	0.320923	0.0563636	1.96037	1.96574	-7.22456	0.434472	0.268767	0.067668	54.4016	20.646	4	1.9472	2	good
AGCAGCTAACC	MS81	170680	32.4179	15	1.12564	0.131133	1.95664	1.982	-126.348	0.106054	0.478177	0.0530709	752.228	278.754	14	1.9472	2	bad
AGCAGCTAACC	NZ169	73709	13.9998	10	0.606656	0.204284	2.15788	2.14378	-8.95041	0.236919	0.57301	0.394543	796.12	273.228	1	2.29421	2	bad
AGCAGCTAACC	NZ170	1050658	199.555	25	1.47213	0.147016	8.87788	8.94758	-250.357	0.187313	1.69202	2.03736	202.678	53.2136	10	4.23324	2	bad
AGCAGCTAACC	NZ186	2472712	469.651	391	0.321888	0.18047	3.0577	3.02097	-18.6387	0.443035	0.306915	0.0723042	75.177	19.4194	2	3.07066	3	good
AGCAGCTAACC	NZ250	80261	15.2443	6	1.29814	0.15217	6.20323	6.24524	-3.47607	0.176264	1.06151	0.106135	362.627	70.4265	2	4.7377	5	bad
AGCATGATAGG	MS157	118979	22.5981	18	0.51299	0.175861	5.91017	5.96959	-7.21032	0.269157	0.559581	0.214024	256.664	38.0588	24	6.05394	6	bad
AGCATGATAGG	MS81	21438	4.07179	3	0.980595	0.158849	3.21718	3.22027	-7.79147	0.0188499	0.992921	0.05024	647.187	154.54	74	3.28946	3	bad
AGCATGATAGG	NZ169	702836	133.492	106	0.367706	0.0852689	2.2772	2.28155	-10.7671	0.660366	0.430462	0.523651	226.271	73.8754	2	2.29858	2	good
AGCATGATAGG	NZ170	179519	34.0967	11	0.932024	0.214075	4.87666	4.87688	-4.63426	0.315651	1.65354	0.990826	468.54	146.142	2	3.05204	2	bad
AGCATGATAGG	NZ186	17054	3.23913	2	0.948516	0.162054	1.74128	1.75333	-13.7798	0.0492145	1.04563	0.0252162	1081.65	377.669	2	1.93732	2	bad
AGCATGATAGG	NZ250	170573	32.3975	26	0.445281	0.0762578	1.96338	1.9715	-11.0805	0.332558	0.4623	0.195741	532.838	202.538	11	2.01178	2	good
AGCCAACGGCA	MS157	705910	134.076	108	0.400669	0.136643	1.85116	1.86604	-3.47199	0.732029	0.489384	0.0476557	365.998	167.068	2	1.66553	2	good
AGCCAACGGCA	MS81	94711	17.9888	12	0.889337	0.0791671	1.96477	1.98903	-7.82681	0.0995038	0.524405	0.0652039	745.978	272.654	28	1.96733	2	bad
AGCCAACGGCA	NZ169	57536	10.928	8	0.854456	0.147163	3.24576	3.23625	-5.45266	0.131711	0.650014	0.439717	560.447	141.562	4	3.15214	3	bad
AGCCAACGGCA	NZ170	690930	131.231	14	1.38941	0.164018	9.63989	9.63959	71.4316	0.213491	1.30822	5.01627	141.418	45.2681	51	5.98025	2	bad
AGCCAACGGCA	NZ186	1731972	328.96	265	0.34822	0.0574159	1.96977	1.96763	-8.60381	0.381826	0.267442	0.060293	93.2574	35.7749	1	1.9472	2	good
AGCCAACGGCA	NZ250	1615540	306.845	252	0.331581	0.0522344	2.01512	2.02124	-17.2845	0.602442	0.325842	0.199708	97.7723	38.5707	0	2.05394	2	good
AGCCGAGGAGT	MS157	279366	53.061	46	0.380977	0.0490679	1.93861	1.9309	-9.14761	0.292293	0.357236	0.067668	382.172	145.395	0	1.9472	2	good
AGCCGAGGAGT	MS81	370515	70.3732	51	0.492369	0.0699551	1.96195	1.961	-14.0765	0.184907	0.390048	0.0530709	568.7	209.98	12	1.9472	2	good
AGCCGAGGAGT	NZ169	14727	2.79715	2	1.06519	0.126534	2.60265	2.60309	-33.2437	0.0354848	1.23767	0.18544	786.845	231.171	6	2.58196	3	bad
AGCCGAGGAGT	NZ170	180229	34.2315	2	1.79198	0.156094	6.97967	7.02468	-63.8327	0.0641453	1.95907	0.542721	286.232	67.1719	24	3.81121	3	bad
AGCCGAGGAGT	NZ186	471373	89.5295	73	0.409135	0.181292	3.78772	3.79055	-4.53606	0.615518	0.605103	0.261259	339.152	83.3396	21	3.54549	3	bad
AGCCGAGGAGT	NZ250	5484	1.0416	0	1.36142	0.0595434	3.18391	3.18152	20.6314	0.0168438	0.663897	0.0845612	745.12	226.845	2	2.03761	2	bad
AGCGATGAACG	MS157	1022833	194.27	162	0.363767	0.0636132	1.96953	1.97645	-8.03485	0.378212	0.307048	0.0693417	184.849	70.2899	4	1.95138	2	good
AGCGATGAACG	MS81	3278721	622.739	506	0.377545	0.165383	1.98507	1.99254	-14.0232	0.402426	0.336966	0.0537296	328.67	123.414	4	1.96163	2	good
AGCGATGAACG	NZ169	1065850	202.441	9	1.3324	0.142086	2.68396	2.66708	9.01668	0.2334	0.747191	0.418191	819.122	395.321	3	3.22127	1	bad
AGCGATGAACG	NZ170	1277187	242.581	206	0.340695	0.0575185	1.98202	1.98034	-17.3904	0.230472	0.281416	-0.000552395	185.934	70.6834	1	2.00171	2	good
AGCGATGAACG	NZ186	833179	158.249	13	1.52076	0.069096	1.25378	1.26965	6.49942	0.170594	0.548416	0.899047	1568.46	849.994	5	1.77075	1	bad
AGCGATGAACG	NZ250	3020248	573.646	416	0.463932	0.15984	3.37414	3.34793	-13.2834	0.544522	0.518797	0.394179	325.025	79.8393	2	3.39601	3	bad
AGCTATCCGGC	MS157	1228495	233.332	202	0.319858	0.0460016	1.97319	1.96744	-7.30477	0.442035	0.262681	0.067668	66.1009	26.2806	28	1.9472	2	good
AGCTATCCGGC	MS81	2204369	418.684	346	0.33748	0.1548	2.83911	2.79799	-28.0956	0.685444	0.427654	0.0883151	181.054	46.4229	21	2.82507	2	good
AGCTATCCGGC	NZ169	913779	173.557	20	1.55791	0.142925	2.87434	2.89052	8.01895	0.12204	1.14592	0.993292	433.864	191.477	14	1.64501	1	bad
AGCTATCCGGC	NZ170	533532	101.336	18	1.54696	0.134134	3.70964	3.68596	9.64806	0.0693715	0.986184	0.116691	365.892	113.455	11	2.36809	2	bad
AGCTATCCGGC	NZ186	2038800	387.236	348	0.314188	0.0605892	1.92457	1.92447	-8.26629	0.515415	0.291593	0.0734869	160.176	62.3664	12	1.89953	2	good
AGCTATCCGGC	NZ250	34014	6.4604	2	1.16399	0.183632	1.60521	1.63006	-13.0403	0.142153	1.17195	0.121134	1560.41	798.562	0	1.43856	1	bad
AGCTTGCTCAT	MS157	1453745	276.115	242	0.331849	0.0789646	1.92483	1.96039	-8.48301	0.402632	0.290208	0.0718092	131.4	50.7029	8	1.92802	2	good
AGCTTGCTCAT	MS81	4797501	911.206	742	0.349872	0.0838389	1.95949	1.96688	-14.216	0.362203	0.302708	0.0531423	219.946	85.2803	3	1.94568	2	good
AGCTTGCTCAT	NZ169	145236	27.5852	15	1.02456	0.222256	1.92932	1.95832	-10.7034	0.126303	0.469649	0.195577	690.062	257.772	44	1.95708	2	good
AGCTTGCTCAT	NZ170	1773957	336.934	259	0.376475	0.10266	2.36661	2.39329	-20.2016	0.662586	0.438396	0.714695	223.506	68.0623	8	2.40228	2	good
AGCTTGCTCAT	NZ186	2396430	455.162	358	0.350065	0.0618809	1.80103	1.80936	-10.3358	0.537414	0.339691	0.0813805	159.281	63.7623	25	1.80855	2	good
AGCTTGCTCAT	NZ250	51929	9.86306	8	0.687843	0.146654	2.07426	2.11751	-4.26541	0.105316	0.643534	0.108294	1014.61	362.344	4	2.02697	2	bad
AGGAACAATGT	MS157	2315431	439.778	8	1.31302	0.170615	4.05356	3.94933	-11.884	0.307775	1.56932	0.0876893	201.663	183.907	2	1.46249	0	bad
AGGAACAATGT	MS81	90956	17.2756	8	1.16095	0.177257	3.3026	3.31773	-8.04503	0.111762	0.600101	0.0886668	462.16	115.803	0	3.18746	3	bad
AGGAACAATGT	NZ169	2678503	508.738	410	0.337911	0.0859329	2.38005	2.3876	-14.1861	0.716872	0.404281	0.610572	154.406	48.1845	39	2.39886	2	good
AGGAACAATGT	NZ170	548916	104.258	8	1.63987	0.133263	7.21163	7.23383	-15.3802	0.114883	1.25346	0.874565	190.42	41.6211	16	3.96125	3	bad
AGGAACAATGT	NZ186	70526	13.3953	11	0.565635	0.141943	3.17508	3.18891	-8.93713	0.132657	0.533371	0.114348	462.473	115.963	12	3.20988	3	bad
AGGAACAATGT	NZ250	3329439	632.372	500	0.442473	0.170171	2.01673	2.03772	-18.1136	0.471336	0.497762	0.19955	660.91	236.093	4	2.05337	2	good
AGGACCGCATT	MS157	781575	148.447	4	1.67694	0.170379	11.9251	11.9487	-10.0095	0.142204	1.90363	0.167329	158.934	27.6886	15	5.6264	4	bad
AGGACCGCATT	MS81	2715866	515.834	446	0.308424	0.0675773	1.98957	1.98256	-9.37055	0.479632	0.282	0.0530709	157.367	61.7228	13	1.9472	2	good
AGGACCGCATT	NZ169	39147	7.43533	6	0.646614	0.110348	2.06328	2.06328	-4.0103	0.0516715	0.616932	0.141311	924.431	329.121	23	2.02963	2	bad
AGGACCGCATT	NZ170	551089	104.67	8	1.54835	0.158774	7.24942	7.31767	-375.389	0.210123	1.11692	1.11006	209.667	46.6553	20	4.29953	3	bad
AGGACCGCATT	NZ186	1203947	228.67	16	1.29098	0.187889	2.74702	2.81301	2.95587	0.371702	0.820093	0.297788	720.32	399.862	21	2.73048	1	bad
AGGACCGCATT	NZ250	25972	4.93295	2	1.15836	0.105766	5.096	5.07259	-18.227	0.0618074	1.2076	0.16519	394.891	70.562	0	4.80057	5	bad
AGGCAATGATG	MS157	205717	39.0726	34	0.392792	0.161264	1.96208	1.97098	-8.71481	0.307223	0.389255	0.0732545	423.418	164.246	44	1.96733	2	good
AGGCAATGATG	MS81	67360	12.7939	10	0.54427	0.163046	1.93945	1.95541	-5.89251	0.0728569	0.508883	0.061311	836.763	306.846	0	1.95821	2	bad
AGGCAATGATG	NZ169	605809	115.063	44	0.451259	0.0934758	2.30077	2.34066	-6.01721	0.654613	2.30632	1.18339	925.071	356.422	1	1.42127	0	bad
AGGCAATGATG	NZ170	90572	17.2027	2	1.73866	0.0971348	9.37405	9.3764	73.2537	0.0835478	2.4878	0.939061	261.792	52.2747	23	4.40437	6	bad
AGGCAATGATG	NZ186	313562	59.5559	51	0.409182	0.171268	3.22379	3.24105	-5.42526	0.47309	0.474449	0.147552	252.787	66.6298	26	3.12953	3	bad
AGGCAATGATG	NZ250	4707	0.894017	0	1.5836	0.00605908	2.10678	2.10508	1.9261	0.0775293	0.0338733	0	0	0	0	2	2	bad
AGGCTGTAGCG	MS157	692307	131.492	116	0.332552	0.0393099	1.96131	1.9616	-8.46904	0.384094	0.29216	0.0773162	146.076	56.5619	12	1.9453	2	good
AGGCTGTAGCG	MS81	2165210	411.246	343	0.349033	0.162995	2.05445	2.06046	-26.9746	0.510795	0.351844	0.0720006	274.836	94.1791	2	2.05432	2	good
AGGCTGTAGCG	NZ169	674952	128.196	8	1.58081	0.207087	4.86331	4.80455	711.3	0.150681	1.19938	1.07252	336.508	108.392	2	2.68376	2	bad
AGGCTGTAGCG	NZ170	852210	161.863	123	0.385216	0.119818	2.36745	2.3721	-16.4598	0.633887	0.435287	0.711519	207.612	64.0768	58	2.38993	2	good
AGGCTGTAGCG	NZ186	1293088	245.601	181	0.460932	0.159529	4.62541	4.62396	-5.14014	0.494824	0.47796	0.133794	209.822	41.4544	27	4.55499	5	bad
AGGCTGTAGCG	NZ250	16189	3.07483	2	1.16882	0.141074	5.6606	5.69242	179.053	0.0992014	1.58454	0.443239	517.432	107.806	3	4.01349	4	bad
AGGTCAGTTCG	MS157	448207	85.1295	73	0.346043	0.180339	2.4792	2.48853	-6.97669	0.560745	0.377694	0.101309	214.044	68.7281	3	2.44425	3	good
AGGTCAGTTCG	MS81	1721151	326.904	277	0.327869	0.124004	1.96778	1.96509	-15.8435	0.398271	0.297738	0.0535477	204.726	80.464	11	1.95271	2	good
AGGTCAGTTCG	NZ169	1757270	333.764	281	0.321358	0.12437	2.29683	2.31222	-18.705	0.677432	0.415713	0.667102	212.129	70.3053	44	2.35897	2	good
AGGTCAGTTCG	NZ170	914000	173.599	132	0.393089	0.0905716	2.22659	2.2295	-15.6681	0.628636	0.493886	0.705356	467.756	156.431	55	2.24938	2	good
AGGTCAGTTCG	NZ186	1147095	217.872	183	0.415128	0.152456	4.95297	4.93885	-3.20222	0.666025	0.575789	0.239943	208.972	43.4602	2	4.37626	5	bad
AGGTCAGTTCG	NZ250	10663	2.02526	0	1.48851	0.120945	2.34133	2.36056	10.331	0.207142	0.886931	0.0413745	225.374	87.9337	26	1.57569	1	bad
AGTAAGGCGCG	MS157	1368775	259.976	228	0.320012	0.163651	2.91644	2.93212	-18.3092	0.560417	0.401645	0.0746945	160.507	41.8763	8	2.95195	3	good
AGTAAGGCGCG	MS81	4326083	821.668	680	0.327715	0.0847501	1.97303	1.98762	-9.93269	0.45137	0.290996	0.053657	237.65	90.9995	27	1.95726	2	good
AGTAAGGCGCG	NZ169	43670	8.2944	6	0.700206	0.135583	2.13282	2.16233	-4.65616	0.121928	0.651041	0.137809	911.556	325.33	9	2.11795	2	bad
AGTAAGGCGCG	NZ170	307732	58.4486	8	1.67426	0.130678	2.73088	2.79037	11870.4	0.0923149	0.856333	0.124533	578.218	204.405	24	2.0245	2	bad
AGTAAGGCGCG	NZ186	2479104	470.865	390	0.341653	0.0704629	1.9743	1.96611	-7.32085	0.454367	0.271756	0.0660178	60.9343	23.8606	16	1.94017	2	good
AGTAAGGCGCG	NZ250	48012	9.11909	4	1.19962	0.197013	7.68688	7.70626	-5.5139	0.181822	1.21457	0.040846	269.428	39.0639	0	6.00532	6	bad
AGTCACCTCGG	MS157	49166	9.33827	4	1.23675	0.165096	2.81747	2.89446	-5.29315	0.125807	1.11041	0.0911785	599.184	202.702	0	2.11035	2	bad
AGTCACCTCGG	MS81	3896847	740.142	651	0.319675	0.0761868	1.98797	1.99709	-11.4888	0.418967	0.290832	0.0531679	168.874	63.7516	3	1.95233	2	good
AGTCACCTCGG	NZ169	2506229	476.017	381	0.33333	0.117463	2.0137	1.98113	-11.9336	0.813079	0.510408	0.685336	355.836	132.451	3	2.03001	2	good
AGTCACCTCGG	NZ170	1311493	249.096	197	0.373301	0.101799	2.18213	2.20094	-16.895	0.618938	0.439544	0.533237	249.881	81.9551	2	2.21861	2	good
AGTCACCTCGG	NZ186	1917865	364.267	290	0.447283	0.177547	4.8555	4.83938	-3.70705	0.556655	0.551576	0.122449	229.763	44.7688	34	4.55651	3	bad
AGTCACCTCGG	NZ250	2300677	436.976	237	0.627973	0.216502	4.29172	4.32621	-4.42188	0.539006	1.31158	0.418144	568.267	122.626	27	3.87597	4	bad
AGTCACTAGAA	MS157	1613344	306.428	266	0.325381	0.0536153	1.94335	1.94847	-8.76137	0.393239	0.281229	0.0714796	83.5738	32.3349	0	1.94796	2	good
AGTCACTAGAA	MS81	3708423	704.354	49	0.860857	0.161033	2.23333	2.15954	6.4051	0.365508	1.24213	0.284343	724.365	720.668	0	1.366	0	bad
AGTCACTAGAA	NZ169	3290664	625.007	471	0.333172	0.168936	2.05935	2.06234	-8.80043	0.774813	0.406242	0.592066	144.716	53.2485	1	2.05717	2	good
AGTCACTAGAA	NZ170	662645	125.858	14	1.55145	0.21034	4.22185	4.2667	6.8271	0.116103	1.0066	0.0272455	346.402	110.108	14	3.1037	2	bad
AGTCACTAGAA	NZ186	2347445	445.858	354	0.360148	0.0777869	1.95892	1.96112	-9.27457	0.3595	0.282081	0.0602922	96.7815	37.834	26	1.94663	2	good
AGTCACTAGAA	NZ250	3713341	705.288	580	0.352704	0.070694	1.98391	1.98639	-11.384	0.271977	0.262129	0	151.026	58.0614	0	2	2	good
AGTCGTCCTCT	MS157	194255	36.8955	2	1.87269	0.115412	5.99958	5.99454	-135.027	0.0539862	1.94025	0.115485	348.052	86.3375	8	3.2207	3	bad
AGTCGTCCTCT	MS81	196440	37.3105	19	1.07436	0.103551	2.14986	2.14936	331.541	0.133032	0.472245	0.0153603	607.928	209.539	29	2.14302	2	bad
AGTCGTCCTCT	NZ169	631644	119.97	12	1.67702	0.165612	2.48762	2.52334	5.7415	0.0822283	0.707703	0.450512	613.472	218.756	1	2.10351	2	bad
AGTCGTCCTCT	NZ170	644034	122.324	12	1.64357	0.15371	2.81068	2.79434	5.32043	0.146539	0.800057	0.319879	592.089	203.929	73	2.19297	2	bad
AGTCGTCCTCT	NZ186	739123	140.384	27	1.62497	0.103066	3.33838	3.33679	6.51231	0.0858447	0.59406	0.061035	536.394	135.597	7	3.03856	3	bad
AGTCGTCCTCT	NZ250	3088103	586.534	475	0.344578	0.0793416	1.97199	2.0195	-11.3193	0.631255	0.340718	0.196495	195.41	75.7309	2	2.02944	2	good
AGTCTAACTTC	MS157	1790877	340.148	301	0.332018	0.0282824	1.96497	1.96735	-7.31566	0.43633	0.275146	0.067668	120.711	46.4198	8	1.9472	2	good
AGTCTAACTTC	MS81	270211	51.3221	18	1.3233	0.122316	2.09624	2.12735	22.5224	0.124805	0.505519	0.091478	694.531	244.454	0	2.07996	2	bad
AGTCTAACTTC	NZ169	4022797	764.064	25	0.454884	0.0680421	1.75152	1.73345	2.71132	0.775125	0.983386	2.5807	1149.31	1240.99	0	1.78424	0	bad
AGTCTAACTTC	NZ170	1943691	369.172	282	0.377078	0.172025	2.99941	2.97563	-12.83	0.775393	0.552852	0.638969	218.727	57.698	20	3.03381	2	good
AGTCTAACTTC	NZ186	2749281	522.181	437	0.435735	0.232611	5.04841	5.09049	-3.91301	0.516875	0.569121	0.164638	230.611	42.638	29	4.94682	4	bad
AGTCTAACTTC	NZ250	42420	8.05698	6	0.914498	0.153404	2.27826	2.26985	-3.36058	0.0756521	0.694687	0.0855891	915.143	322.809	28	2.03818	2	bad
AGTGACACAGC	MS157	182004	34.5687	24	0.764274	0.098276	1.98771	1.99347	41.0523	0.141339	0.474636	0.067668	696.393	255.325	7	1.9472	2	bad
AGTGACACAGC	MS81	532055	101.055	68	0.691092	0.0883377	1.96375	1.98502	91.5116	0.172466	0.318323	0.0540531	310.118	120.028	0	1.95366	2	good
AGTGACACAGC	NZ169	107993	20.5115	17	0.505153	0.172802	3.2453	3.24439	-9.13557	0.235895	0.499627	0.610736	411.399	100.91	19	3.25375	3	bad
AGTGACACAGC	NZ170	399525	75.8832	26	1.32198	0.137069	3.53231	3.54051	18.5318	0.202711	0.509627	0.952577	330.671	76.1481	14	3.56277	3	bad
AGTGACACAGC	NZ186	2602842	494.367	406	0.333734	0.056805	1.7892	1.80371	-8.83337	0.542922	0.329882	0.0799774	103.481	42.4843	29	1.81083	2	good
AGTGACACAGC	NZ250	3666729	696.435	589	0.383439	0.170042	2.87107	2.91098	-10.04	0.666215	0.524475	0.146738	330.335	92.54	23	2.86724	2	good
AGTGCATGTGT	MS157	561479	106.644	94	0.334032	0.070607	1.95386	1.96158	-8.41902	0.372468	0.293317	0.0708986	136.409	52.5629	11	1.94758	2	good
AGTGCATGTGT	MS81	59655	11.3305	9	0.550214	0.0536976	1.98229	1.98236	-6.03543	0.0901436	0.499477	0.0706656	811.314	294.969	27	2.03571	2	bad
AGTGCATGTGT	NZ169	30042	5.70598	4	0.721656	0.132385	2.27153	2.27663	-3.50195	0.104809	0.702777	0.154067	907.296	309.643	4	2.14587	2	bad
AGTGCATGTGT	NZ170	1195906	227.143	155	0.379686	0.174663	3.72667	3.71342	-8.55059	0.816984	0.732262	1.26658	266.055	58.5848	2	3.78443	2	bad
AGTGCATGTGT	NZ186	854244	162.25	141	0.31453	0.046231	1.95342	1.96326	-8.8129	0.389768	0.266899	0.060794	76.0699	29.8569	23	1.94948	2	good
AGTGCATGTGT	NZ250	33639	6.38917	3	1.27691	0.168652	4.68927	4.69774	-5.84322	0.0538045	1.02799	0.0794666	627.733	124.345	12	4.15195	4	bad
AGTGGCCGATA	MS157	1287521	244.543	210	0.312501	0.126512	3.34463	3.34798	-11.5972	0.534081	0.301985	0.0937072	36.3013	8.69469	13	3.36847	3	bad
AGTGGCCGATA	MS81	76852	14.5968	12	0.555236	0.159392	2.24906	2.26757	-10.2019	0.191671	0.553798	0.0482389	640.535	213.422	7	2.2547	2	bad
AGTGGCCGATA	NZ169	2780051	528.025	19	0.41116	0.0574727	4.49474	4.43953	55.2976	0.874316	1.60411	2.38014	104.308	54.5345	2	2.03419	0	bad
AGTGGCCGATA	NZ170	1522528	289.179	243	0.384348	0.144173	2.25828	2.27813	-86.3705	0.45155	0.396232	0.0381277	344.551	112.042	12	2.30826	2	good
AGTGGCCGATA	NZ186	2087567	396.499	340	0.3629	0.147117	2.87271	2.87937	-4.15839	0.655698	0.457257	0.150135	158.611	53.2201	25	2.69554	3	bad
AGTGGCCGATA	NZ250	29098	5.52669	3	0.970273	0.16807	6.55703	6.56918	-10.8562	0.154091	1.12234	0.122614	269.41	44.436	0	5.84634	6	bad
AGTTAGGATGA	MS157	145468	27.6292	2	1.81362	0.220259	10.8448	10.9756	74.279	0.024157	2.52782	0.250287	229.645	41.4929	3	4.37189	5	bad
AGTTAGGATGA	MS81	174621	33.1664	8	1.57424	0.1162	4.24858	4.24529	-8.67058	0.0865019	0.791833	0.110613	439.472	97.2705	1	3.66192	4	bad
AGTTAGGATGA	NZ169	1355313	257.419	11	1.50462	0.134385	3.04686	3.08783	5.41894	0.244127	1.03945	1.01061	577.218	292.045	25	2.25185	1	bad
AGTTAGGATGA	NZ170	893895	169.781	7	1.17018	0.1183	1.48249	1.46436	15.9612	0.249603	0.974207	0.224628	1372.31	1381.83	26	1.37493	0	bad
AGTTAGGATGA	NZ186	1299359	246.792	13	1.6281	0.0809305	1.48296	1.51378	3.53774	0.174895	0.711668	0.892988	1346.68	722.405	9	1.65793	1	bad
AGTTAGGATGA	NZ250	19460	3.69611	2	1.43361	0.178151	4.60643	4.66576	-104.507	0.0206906	1.50102	0.277157	499.801	114.481	14	3.30636	3	bad
AGTTGGTGGAT	MS157	47298	8.98348	4	1.3401	0.137638	6.62164	6.58461	-5.69924	0.0836208	1.12279	0.217215	263.181	40.3103	32	5.68813	6	bad
AGTTGGTGGAT	MS81	127215	24.1624	13	1.00366	0.186513	2.02059	2.03709	-16.2842	0.131885	0.567001	0.0652796	850.133	310.819	0	1.96391	2	bad
AGTTGGTGGAT	NZ169	3071325	583.348	454	0.349532	0.115196	2.20856	2.21681	-14.023	0.713745	0.415187	0.638394	197.693	67.5133	13	2.26116	2	good
AGTTGGTGGAT	NZ170	1732866	329.129	251	0.373399	0.151067	2.86255	2.8608	-7.12711	0.681619	0.424642	0.788632	188.024	56.2938	0	2.81728	3	good
AGTTGGTGGAT	NZ186	2981677	566.32	244	0.762491	0.221893	4.31203	4.27011	-41.5426	0.643861	1.97129	0.328714	495.428	142.099	5	2.96562	0	bad
AGTTGGTGGAT	NZ250	3093725	587.602	466	0.367379	0.10142	1.92854	1.97843	-16.7527	0.641518	0.418814	0.196373	261.353	100.116	1	1.98557	2	good
ATAATGCCGAG	MS157	95119	18.0663	7	1.32194	0.114011	3.09009	3.10797	-4.03978	0.130385	0.994944	0.0945748	524.418	170.362	0	2.2528	2	bad
ATAATGCCGAG	MS81	239374	45.4651	21	1.1709	0.0886903	3.09462	3.09015	18.1064	0.076974	0.454528	0.0780143	405.048	106.06	0	3.03096	3	bad
ATAATGCCGAG	NZ169	72031	13.6811	11	0.555358	0.108093	1.97933	2.01189	-8.01187	0.0870093	0.507015	0.143206	793.061	290.576	18	2.03723	2	bad
ATAATGCCGAG	NZ170	1874567	356.043	273	0.384074	0.177632	2.05968	2.0823	-8.91502	0.735773	0.506844	0.606385	395.388	143.038	1	2.05565	2	good
ATAATGCCGAG	NZ186	2571851	488.481	428	0.284949	0.0519382	1.97141	1.97355	-7.09038	0.444825	0.221084	0.0603589	25.4896	9.98881	27	1.94891	2	good
ATAATGCCGAG	NZ250	36041	6.84539	4	0.936544	0.20192	3.35479	3.35131	-3.57803	0.100322	0.905708	-0.0158887	573.147	153.175	17	2.90579	3	bad
ATACGGATAAC	MS157	1046183	198.705	174	0.347723	0.069938	1.96301	1.94948	-5.69297	0.623402	0.336133	0.0697229	191.323	75.5035	6	1.89649	2	bad
ATACGGATAAC	MS81	98803	18.766	11	0.957542	0.107111	2.09063	2.07668	-13.1007	0.0756644	0.569149	0.027801	757.561	265.444	4	2.04862	2	bad
ATACGGATAAC	NZ169	785124	149.121	9	1.61965	0.238058	3.31015	3.30635	9.33393	0.170593	1.04621	0.581793	536.548	242.245	2	2.43609	1	bad
ATACGGATAAC	NZ170	1165083	221.288	175	0.368867	0.0948299	2.38517	2.38149	-15.0605	0.644033	0.419623	0.677345	182.297	57.0852	32	2.38519	2	good
ATACGGATAAC	NZ186	2143068	407.04	25	1.24334	0.118736	12.28	12.3496	11.3581	0.402932	1.36018	0.804247	94.8206	38.117	15	6.03932	1	bad
ATACGGATAAC	NZ250	14717	2.79525	2	1.45125	0.113496	3.04755	3.08479	57.6197	0.0342066	1.55429	0.0903466	791.234	253.358	11	1.95745	2	bad
ATAGTATCGGC	MS157	216252	41.0735	5	1.50231	0.167877	4.03436	4.0003	-4.03726	0.130583	0.976024	0.18176	497.061	164.68	3	2.62317	2	bad
ATAGTATCGGC	MS81	2945691	559.485	434	0.382426	0.130931	1.9427	1.94911	-15.7767	0.358288	0.333861	0.0534461	312.343	119.66	1	1.94283	2	good
ATAGTATCGGC	NZ169	1259675	239.255	15	1.65776	0.208959	7.26939	7.2584	3.86391	0.0820163	0.898018	3.37182	199.324	38.7986	9	5.09858	4	bad
ATAGTATCGGC	NZ170	2235242	424.547	55	0.653079	0.193218	2.39569	2.35313	11.0789	0.598781	1.61246	-0.1474	770.498	664.897	14	1.41652	0	bad
ATAGTATCGGC	NZ186	2624447	498.47	406	0.526432	0.133388	3.54887	3.53644	-4.55678	0.58733	0.765176	0.225494	629.428	139.956	46	3.56106	3	bad
ATAGTATCGGC	NZ250	3633086	690.045	557	0.332765	0.0464937	2.01368	2.0194	-15.9735	0.636773	0.298665	0.195039	68.5097	26.6532	50	2.0471	2	good
ATAGTTAGAGG	MS157	39165	7.43875	4	1.05727	0.104354	2.25116	2.27002	-3.45022	0.0782703	0.820289	0.0682754	778.83	279.734	3	1.97094	2	bad
ATAGTTAGAGG	MS81	156481	29.721	13	1.19999	0.0430025	1.94734	1.94517	-22.0413	0.0679354	0.480499	0.054906	679.724	253.87	0	1.96448	2	bad
ATAGTTAGAGG	NZ169	440288	83.6255	7	0.832503	0.127299	0.850726	0.864631	-6.4627	0.151531	0.571641	2.49517	2274.15	2281.84	1	1.37265	0	bad
ATAGTTAGAGG	NZ170	1756748	333.665	267	0.360302	0.119884	2.68072	2.70381	-16.4036	0.702816	0.485373	0.795397	272.539	77.0911	11	2.7094	2	good
ATAGTTAGAGG	NZ186	2382667	452.548	402	0.274365	0.0606014	1.81564	1.83958	-8.18323	0.625093	0.290752	0.0776569	34.4251	13.9359	3	1.81804	2	good
ATAGTTAGAGG	NZ250	56386	10.7096	2	1.25765	0.139487	6.23095	6.18015	105.422	0.329631	3.38256	-0.0219546	535.179	249.362	5	1.9793	1	bad
ATATCGTCTGG	MS157	53865	10.2308	2	1.77395	0.161662	6.58674	6.56183	-1857.61	0.0297975	1.90004	0.248286	426.598	87.9358	35	3.97949	4	bad
ATATCGTCTGG	MS81	53691	10.1977	8	0.669516	0.178635	1.8304	1.84342	-5.51258	0.0839358	0.584003	0.0624553	935.201	360.954	0	1.85052	2	bad
ATATCGTCTGG	NZ169	37345	7.09307	4	1.15625	0.194843	3.72676	3.74198	-3.94136	0.100545	0.877009	0.543911	621.851	147.494	19	3.40437	3	bad
ATATCGTCTGG	NZ170	2278212	432.709	348	0.374055	0.129643	2.30633	2.36227	-10.0851	0.66948	0.451051	0.720619	278.136	97.6348	16	2.34036	2	good
ATATCGTCTGG	NZ186	62744	11.9172	10	0.602591	0.111303	1.9292	1.96633	-6.50956	0.118144	0.515575	0.0663729	908.889	337.222	0	1.95651	2	bad
ATATCGTCTGG	NZ250	16030	3.04463	0	1.7849	0.164264	3.95606	3.97771	10.6016	0.0223518	0.69781	0.35965	169.293	45.0904	3	2.45698	2	bad
ATCAATGTTGG	MS157	13983	2.65584	2	0.936137	0.0942875	1.86085	1.88245	-21.1562	0.0499035	1.24558	0.139477	1340.88	467.899	3	1.87521	2	bad
ATCAATGTTGG	MS81	30177	5.73162	4	0.705372	0.127708	2.12537	2.15689	-2.98545	0.0642773	0.692302	0.0530709	896.519	321.323	5	1.9472	2	bad
ATCAATGTTGG	NZ169	2207	0.419183	0	1.86135	4.44089e-16	2	2	2.91793	0.0360297	5.28565e-15	0	0	0	3	2	2	bad
ATCAATGTTGG	NZ170	6480	1.23077	0	1.90093	4.44089e-16	2	2	2.77185	0.0342437	8.00857e-15	0	0	0	70	2	2	bad
ATCAATGTTGG	NZ186	2962	0.562583	0	1.53984	8.88178e-16	2	2	1.98511	0.0463678	1.16925e-14	0	9.95544	3.2174	4	2	2	bad
ATCAATGTTGG	NZ250	1173	0.222792	0	1.82438	0.00464047	4.99536	5	3.29119	0.0284473	3.20343e-15	-0.00246661	0	0	4	5.00456	5	bad
ATCAGATTCGT	MS157	82493	15.6682	4	1.50996	0.1125	8.06723	8.14814	-3.61675	0.110795	0.911479	0.100395	280.977	42.1203	10	5.99734	7	bad
ATCAGATTCGT	MS81	5038327	956.947	769	0.375696	0.0687965	1.96206	1.99783	-13.9638	0.354578	0.323657	0.0664176	290.344	107.854	4	1.97607	2	good
ATCAGATTCGT	NZ169	131920	25.056	14	0.984339	0.155483	2.24595	2.24407	-32.6448	0.0940032	0.571028	0.0469742	765.219	256.49	16	2.18974	2	bad
ATCAGATTCGT	NZ170	2376953	451.463	353	0.359142	0.129588	2.0767	2.08337	-14.4689	0.671895	0.43471	0.551755	336.03	118.763	69	2.09896	2	good
ATCAGATTCGT	NZ186	3384367	642.805	567	0.285978	0.0419579	1.97498	1.9736	-6.78379	0.459939	0.220173	0.064609	20.1871	7.78435	41	1.94074	2	good
ATCAGATTCGT	NZ250	32449	6.16315	4	0.763044	0.104944	4.87793	4.86713	-3.2299	0.149073	0.726058	0.141159	387.764	74.6082	0	4.3339	4	bad
ATCATCGCGCT	MS157	1809475	343.68	302	0.314913	0.0653778	1.95681	1.95913	-7.55151	0.434731	0.271458	0.0728223	89.4403	35.2493	14	1.94036	2	good
ATCATCGCGCT	MS81	334453	63.5238	23	1.3501	0.116556	4.62165	4.63337	13.4968	0.0751553	0.483379	0.105129	297.457	54.9251	0	4.46686	4	bad
ATCATCGCGCT	NZ169	88690	16.8452	13	0.679107	0.193115	5.49784	5.53935	-9.52162	0.113571	0.592598	0.67395	279.777	45.3926	9	5.35385	5	bad
ATCATCGCGCT	NZ170	506766	96.2519	15	1.68528	0.146113	5.33089	5.31052	19.8112	0.0850758	0.575865	0.730491	265.88	44.3299	36	5.0906	5	bad
ATCATCGCGCT	NZ186	3178753	603.752	527	0.295645	0.044863	1.97429	1.978	-6.45627	0.461151	0.229063	0.0601154	16.762	6.39511	5	1.9453	2	good
ATCATCGCGCT	NZ250	34780	6.60589	6	0.694882	0.152798	2.23605	2.20698	-3.41663	0.0897594	0.671724	0.114707	916.885	317.152	0	2.0302	2	bad
ATCCATAGTCC	MS157	57050	10.8357	4	1.38727	0.143962	2.37044	2.35871	-3.15262	0.0835463	0.78605	0.070821	901.8	327.801	4	1.95233	2	bad
ATCCATAGTCC	MS81	2272722	431.666	334	0.351085	0.105049	1.93383	1.97503	-9.08034	0.463473	0.302027	0.0523224	194.405	74.6765	4	1.92953	2	good
ATCCATAGTCC	NZ169	50259	9.54587	8	0.5868	0.153044	2.09069	2.0725	-4.6886	0.175052	0.605251	0.336669	850.13	304.909	2	2.04349	2	bad
ATCCATAGTCC	NZ170	1073899	203.969	159	0.356025	0.0509536	2.20705	2.20774	-23.1308	0.65862	0.409597	0.67457	215.039	74.9582	13	2.24255	2	good
ATCCATAGTCC	NZ186	1671536	317.481	253	0.352012	0.15631	1.88786	1.88352	-13.2708	0.45282	0.328782	0.0720722	212.657	86.4013	15	1.90047	2	good
ATCCATAGTCC	NZ250	25511	4.84539	4	0.851201	0.185378	4.13004	4.14472	-5.51049	0.111845	0.966244	0.172192	515.204	109.889	3	3.80836	4	bad
ATCCGGCCTTA	MS157	1792705	340.495	292	0.328635	0.0917713	1.79364	1.78298	-9.34322	0.541212	0.376976	0.0586372	242.771	100.789	15	1.79373	2	good
ATCCGGCCTTA	MS81	156707	29.7639	18	0.92604	0.158303	2.10092	2.08941	-50.9585	0.137534	0.483808	0.0658217	663.668	227.853	6	2.07825	2	bad
ATCCGGCCTTA	NZ169	62074	11.7899	10	0.592873	0.201843	2.06843	2.06035	-6.82137	0.124394	0.575511	0.176461	902.501	320.313	60	2.05147	2	bad
ATCCGGCCTTA	NZ170	740665	140.677	11	1.23293	0.108074	3.46398	3.45223	8.24389	0.202914	0.701809	2.01013	654.49	350.887	48	4.9793	1	bad
ATCCGGCCTTA	NZ186	3017644	573.152	500	0.299902	0.162251	2.1561	2.17165	-8.91786	0.710345	0.412439	0.0748477	191.088	66.1989	2	2.13827	2	good
ATCCGGCCTTA	NZ250	42505	8.07312	4	0.989131	0.214325	7.15614	7.18386	-6.75281	0.217233	1.09448	0.514087	345.539	56.7495	7	6.08053	6	bad
ATCGGTTCTAC	MS157	1821564	345.976	212	0.778327	0.179349	5.42376	5.41666	-6.37425	0.363762	1.08413	0.196641	414.421	71.8787	0	5.1377	4	bad
ATCGGTTCTAC	MS81	6415393	1218.5	991	0.344404	0.11892	2.01583	2.02609	-13.8331	0.398609	0.3024	0.0555445	196.15	73.6506	0	1.98538	2	good
ATCGGTTCTAC	NZ169	135996	25.8302	21	0.516155	0.173289	3.35421	3.35859	-11.948	0.233964	0.465957	0.601811	288.171	67.0087	0	3.39734	3	bad
ATCGGTTCTAC	NZ170	1192642	226.523	22	1.54793	0.107419	10.1749	10.1917	10.5487	0.10504	1.32173	0.214184	139.678	24.3999	0	5.06021	3	bad
ATCGGTTCTAC	NZ186	2529541	480.445	54	1.18863	0.101391	3.06814	3.0558	2.38226	0.494189	0.658713	0.549908	705.504	386.119	25	4.41899	1	bad
ATCGGTTCTAC	NZ250	37362	7.0963	4	1.03675	0.213067	6.94662	6.89584	-3.67393	0.097323	0.790837	0.170285	333.192	49.8011	0	5.90503	6	bad
ATCGTGAGCCA	MS157	1350101	256.429	210	0.349516	0.0432764	1.96761	1.96731	-7.56659	0.405206	0.283912	0.067668	121.418	46.9613	9	1.9472	2	good
ATCGTGAGCCA	MS81	5803346	1102.25	932	0.347718	0.105843	1.98987	1.99355	-10.9418	0.48649	0.311485	0.0532297	228.304	88.4663	0	1.96201	2	good
ATCGTGAGCCA	NZ169	101403	19.2598	11	0.877282	0.135863	1.975	2.047	-7.67362	0.0934646	0.50189	0.111342	921.465	332.518	3	2.3415	2	bad
ATCGTGAGCCA	NZ170	2166757	411.54	303	0.36908	0.147793	1.57792	1.54594	-15.2244	0.720115	0.513001	0.362914	451.728	191.037	10	1.56201	1	bad
ATCGTGAGCCA	NZ186	2737608	519.964	446	0.363168	0.178435	3.21902	3.22299	-5.11753	0.583568	0.442524	0.1054	187.49	53.7172	0	3.14701	3	bad
ATCGTGAGCCA	NZ250	60853	11.558	2	1.05826	0.142283	4.38111	4.40581	-21.4409	0.195975	1.30175	1.19377	505.487	264.244	11	3.40266	1	bad
ATCTGACAGAG	MS157	1677959	318.701	299	0.312644	0.111338	1.96657	1.96385	-12.2213	0.429387	0.336533	0.0673568	319.112	119.693	0	1.94891	2	good
ATCTGACAGAG	MS81	5318781	1010.21	801	0.343714	0.123556	1.96324	1.98558	-15.6036	0.419427	0.299503	0.0545396	261.786	99.1093	29	1.96524	2	good
ATCTGACAGAG	NZ169	4115700	781.709	630	0.346014	0.149756	2.33919	2.34951	-4.29523	0.893744	0.45067	0.714621	160.835	57.1336	9	2.20247	2	good
ATCTGACAGAG	NZ170	1902972	361.438	285	0.358973	0.139493	2.0225	2.0361	-5.79579	0.831469	0.535547	0.61983	401.408	145.66	22	1.96011	2	good
ATCTGACAGAG	NZ186	2577791	489.609	377	0.360082	0.0613012	1.84759	1.82302	-9.64159	0.524974	0.337233	0.0726809	150.187	58.2855	11	1.83001	2	good
ATCTGACAGAG	NZ250	26480	5.02944	2	1.49305	0.124256	3.70777	3.73592	-42.2601	0.0184732	1.55084	0.11451	600.753	168.857	29	2.66629	3	bad
ATCTTCAACTC	MS157	1174640	223.104	176	0.456067	0.151427	3.86732	3.85308	-4.56854	0.546727	0.614601	0.0922089	358.977	91.411	0	3.65071	5	bad
ATCTTCAACTC	MS81	159204	30.2382	20	0.778473	0.0987081	1.98352	1.9977	-40.153	0.082152	0.432084	0.0652039	624.193	231.076	0	1.96733	2	bad
ATCTTCAACTC	NZ169	76006	14.4361	10	0.819212	0.18194	2.2447	2.20756	-7.03527	0.127726	0.615201	0.374864	786.75	265.031	0	2.17208	2	bad
ATCTTCAACTC	NZ170	1927689	366.133	255	0.420338	0.160993	1.9048	1.91233	-3.0702	0.803324	0.719268	0.336635	518.073	246.129	0	1.58632	1	bad
ATCTTCAACTC	NZ186	2339333	444.318	343	0.348918	0.131546	1.99566	2.0244	-14.8472	0.36914	0.277764	0.0731118	108.527	42.1889	0	2.02165	2	good
ATCTTCAACTC	NZ250	1721746	327.017	6	1.84185	0.206868	10.4503	10.4599	-5.36146	0.105776	1.40561	0.847368	197.571	35.2591	1	5.83362	5	bad
ATGACTTCGCG	MS157	1003474	190.593	159	0.385854	0.0718203	1.94075	1.94083	-9.69896	0.301985	0.342235	0.0776422	365.983	141.626	66	1.94587	2	good
ATGACTTCGCG	MS81	2919260	554.465	452	0.367741	0.075979	1.98893	1.98684	-10.838	0.3781	0.303691	0.0530897	269.784	102.488	0	1.94891	2	good
ATGACTTCGCG	NZ169	67589	12.8374	9	0.760479	0.255252	5.66355	5.69304	-8.01763	0.0798235	0.599957	0.757566	271.324	43.8799	3	5.45128	5	bad
ATGACTTCGCG	NZ170	1695676	322.066	191	0.454488	0.0964315	1.98337	1.9937	-14.8109	0.835377	1.76538	0.501169	1176.62	362.51	20	1.83495	0	bad
ATGACTTCGCG	NZ186	2055972	390.498	297	0.3899	0.162183	2.43313	2.5001	-2.21315	0.901461	0.645594	0.175983	86.6947	32.8384	3	1.90883	2	good
ATGACTTCGCG	NZ250	1861135	353.492	259	0.383059	0.103385	2.00713	1.98368	-18.1654	0.655759	0.412759	0.202408	207.368	74.5479	0	2.02868	2	good
ATGGACCTGTA	MS157	856188	162.619	99	0.57357	0.183266	2.23686	2.23608	-6.55546	0.544367	1.33852	0.220323	933.144	318.783	12	2.33143	1	bad
ATGGACCTGTA	MS81	3270588	621.194	539	0.347762	0.0776897	1.93613	1.934	-15.7525	0.304683	0.310241	0.0530709	266.353	102.095	0	1.9472	2	good
ATGGACCTGTA	NZ169	2061981	391.639	296	0.362955	0.0822945	2.44203	2.46035	-21.2576	0.689406	0.435914	0.698884	183.344	54.8554	1	2.50446	2	good
ATGGACCTGTA	NZ170	908082	172.475	18	1.31415	0.119638	4.85041	4.88666	1063.3	0.258785	1.56325	1.42183	383.521	162.004	0	2.64027	1	bad
ATGGACCTGTA	NZ186	1575147	299.173	269	0.278489	0.0468933	1.97293	1.97817	-7.9438	0.438598	0.227155	0.0607148	40.0959	15.4713	7	1.95176	2	good
ATGGACCTGTA	NZ250	9220	1.75119	0	1.29306	0.0820179	2.21078	2.26424	16.8116	0.104956	1.21769	-0.119179	486.419	203.468	30	1.58139	1	bad
ATGGTTCTTCT	MS157	630751	119.801	101	0.365577	0.0414251	1.89096	1.92055	-8.85924	0.343015	0.31851	0.0718092	195.185	76.4414	32	1.92802	2	good
ATGGTTCTTCT	MS81	78539	14.9172	8	1.03983	0.0702671	2.10613	2.11734	-7.30114	0.0767089	0.590986	0.0820799	853.301	299.069	1	2.068	2	bad
ATGGTTCTTCT	NZ169	26233	4.98253	4	0.80494	0.118426	5.99121	5.9373	-4.05628	0.0776698	0.834449	0.683561	378.669	57.221	2	5.74207	5	bad
ATGGTTCTTCT	NZ170	951727	180.765	137	0.400294	0.170078	2.16427	2.16838	-4.10791	0.780714	0.625323	0.428539	402.841	146.121	2	1.94036	2	good
ATGGTTCTTCT	NZ186	1484020	281.865	13	0.972981	0.115421	1.07124	1.05765	2.82135	0.491019	0.763897	0.0783303	1826.85	1865.4	0	1.38367	0	bad
ATGGTTCTTCT	NZ250	15255	2.89744	0	1.38158	0.107648	3.15458	3.16193	19.1028	0.137649	1.51106	0.195077	536.255	188.4	10	1.81197	1	bad
ATGTAACGAGA	MS157	1385134	263.083	211	0.552349	0.191864	1.93797	1.95308	-2.77858	0.453365	0.825259	-0.0100002	816.159	381.983	16	1.69459	2	bad
ATGTAACGAGA	MS81	3260044	619.192	457	0.512641	0.0998007	2.16689	2.1958	-36.3947	0.389548	0.568826	0.0244888	809.77	277.401	3	2.22336	2	bad
ATGTAACGAGA	NZ169	2642994	501.993	103	1.16943	0.172697	6.74754	6.75748	149.931	0.315069	2.07603	2.25385	265.911	84.4072	6	3.33257	2	bad
ATGTAACGAGA	NZ170	1137665	216.081	14	0.986984	0.145209	1.32175	1.31895	6.00977	0.325536	0.874665	-0.01868	1640.46	1713.1	28	1.35024	0	bad
ATGTAACGAGA	NZ186	396478	75.3045	64	0.325418	0.0748314	1.89434	1.91473	-11.9643	0.333749	0.288866	0.067145	116.576	46.4553	26	1.91187	2	good
ATGTAACGAGA	NZ250	115452	21.9282	6	1.5185	0.130016	6.0643	6.05842	-4.4865	0.120271	0.870139	0.149478	263.8	47.9372	13	4.63951	4	bad
ATTCCGTAGGC	MS157	1744692	331.375	5	1.00958	0.0777448	7.11309	7.12104	-15.6753	0.331602	2.99326	0.9706	307.036	287.151	2	2.43096	0	bad
ATTCCGTAGGC	MS81	140948	26.7708	13	1.13609	0.150385	3.32311	3.33041	-23.5557	0.0559083	0.505197	0.00187677	444.466	107.863	0	3.3132	3	bad
ATTCCGTAGGC	NZ169	1155141	219.4	105	0.523359	0.0921975	2.74102	2.76669	-2.80686	0.730383	0.891765	0.893798	467.39	164.201	2	2.24179	2	bad
ATTCCGTAGGC	NZ170	1319579	250.632	172	0.373854	0.0926791	2.84489	2.86841	-3.23376	0.814146	0.59071	0.861623	135.979	67.8437	5	2.44976	3	good
ATTCCGTAGGC	NZ186	2168034	411.782	308	0.366212	0.151712	3.11486	3.10228	-9.07431	0.598936	0.391584	0.124534	78.476	20.2013	5	3.08395	3	good
ATTCCGTAGGC	NZ250	23116	4.3905	4	0.839678	0.17903	1.96867	1.96579	-6.18966	0.041238	0.935713	0.0370119	1074.36	390.843	4	1.9472	2	bad
CAACAGGTGAT	MS157	1580475	300.185	262	0.311941	0.0347425	1.94892	1.96501	-7.36677	0.443194	0.27409	0.0713224	91.3127	36.0935	12	1.95214	2	good
CAACAGGTGAT	MS81	188833	35.8657	15	1.22961	0.0667113	2.06867	2.06876	44.3833	0.155734	0.54552	0.0665332	759.173	277.775	12	2.0642	2	bad
CAACAGGTGAT	NZ169	3013318	572.33	63	1.44216	0.21583	14.6488	14.641	36.0654	0.154202	2.22704	1.52067	125.422	29.1133	82	6.00513	2	bad
CAACAGGTGAT	NZ170	1768030	335.808	259	0.361397	0.0923541	2.21045	2.21204	-18.8264	0.655497	0.405461	0.698478	182.083	62.9146	58	2.25166	2	good
CAACAGGTGAT	NZ186	2718877	516.406	21	0.909235	0.0744688	0.740735	0.741479	5.00951	0.571266	0.478048	0.752682	2626.57	2821.27	6	1.47806	0	bad
CAACAGGTGAT	NZ250	46423	8.81728	4	1.15594	0.11295	2.34992	2.34519	-3.62475	0.111586	0.776165	0.0745539	893.243	322.756	3	2.04786	2	bad
CAACGTGATCA	MS157	87465	16.6125	6	1.49667	0.121196	2.15749	2.20128	-3.52315	0.127119	0.732061	0.0696357	881.864	318.828	12	1.93466	2	bad
CAACGTGATCA	MS81	4007387	761.137	609	0.340421	0.141549	2.05706	2.0591	-13.3485	0.435792	0.310478	0.0590669	184.768	67.5231	4	2.0509	2	good
CAACGTGATCA	NZ169	81528	15.4849	13	0.515811	0.102658	2.04574	2.0257	-8.14771	0.0688546	0.480602	0.138582	715.001	258.003	2	2.03932	2	good
CAACGTGATCA	NZ170	330925	62.8538	11	1.65222	0.109084	2.05176	2.0744	38.6343	0.0408469	0.52619	0.134235	783.104	291.37	6	2.03267	2	bad
CAACGTGATCA	NZ186	2900760	550.952	488	0.281481	0.0379455	1.97318	1.98049	-6.36536	0.467248	0.218541	0.060293	11.5518	4.33846	22	1.9472	2	good
CAACGTGATCA	NZ250	41476	7.87768	6	0.745853	0.211048	2.14316	2.16036	-3.4049	0.103546	0.724183	0.0564589	909.948	333.323	37	1.96733	2	bad
CAAGCAATGAC	MS157	628864	119.442	102	0.419544	0.135029	1.963	1.98388	-22.6429	0.324555	0.375203	0.0690067	568.698	208.287	2	1.94834	2	good
CAAGCAATGAC	MS81	183554	34.8631	27	0.595269	0.113619	1.94118	1.95284	-22.7459	0.133235	0.362866	0.0530709	448.162	170.403	8	1.9472	2	good
CAAGCAATGAC	NZ169	151197	28.7174	7	1.48264	0.110274	6.41176	6.40193	-5.34659	0.110635	1.17255	0.432358	301.255	58.4537	21	4.11928	4	bad
CAAGCAATGAC	NZ170	631292	119.904	90	0.414684	0.124637	2.39919	2.3884	-16.0514	0.612341	0.456391	0.664122	343.293	109.212	1	2.3886	2	bad
CAAGCAATGAC	NZ186	919829	174.706	139	0.349315	0.0870963	1.80431	1.84038	-11.4605	0.545921	0.342597	0.0836277	253.771	96.3752	3	1.82203	2	good
CAAGCAATGAC	NZ250	1315018	249.766	204	0.346453	0.0837641	1.97455	1.99297	-16.0261	0.651583	0.412656	0.199916	220.503	85.118	0	2.00133	2	good
CAAGCGCATGT	MS157	577655	109.716	32	0.796146	0.203108	2.81699	2.80508	-5.86868	0.41302	2.53673	0.14719	669.108	285.959	8	1.40399	0	bad
CAAGCGCATGT	MS81	101516	19.2813	10	1.10259	0.100337	1.95973	1.99029	-7.76287	0.0811831	0.514886	0.0652039	758.48	275.868	0	1.96733	2	bad
CAAGCGCATGT	NZ169	953159	181.037	26	1.28112	0.14522	5.9552	5.96053	-19.7231	0.18925	2.01315	0.338411	293.204	97.3652	3	2.58632	1	bad
CAAGCGCATGT	NZ170	965458	183.373	66	0.477207	0.0672789	2.46269	2.49658	-12.0993	0.752537	2.59486	0.443943	803.607	250.758	15	1.45565	0	bad
CAAGCGCATGT	NZ186	1398477	265.618	229	0.357575	0.205276	2.30535	2.32183	-4.99026	0.63423	0.470903	0.118255	244.255	89.4517	15	2.24653	2	good
CAAGCGCATGT	NZ250	15178	2.88281	2	1.05455	0.167483	6.64041	6.66422	-62.1977	0.106896	1.3793	0.437325	347.086	56.0853	0	6.02678	6	bad
CAATACAGAGT	MS157	998807	189.707	171	0.306815	0.0624261	1.96699	1.95661	-9.44433	0.448775	0.284261	0.0678895	121.169	46.1504	5	1.9415	2	good
CAATACAGAGT	MS81	106880	20.3001	13	0.904959	0.0882919	1.95601	1.99128	-11.13	0.0311062	0.478099	0.0625444	765.691	283.176	1	1.9622	2	bad
CAATACAGAGT	NZ169	412068	78.2655	11	1.62711	0.11177	3.07817	3.04445	12.9539	0.0648829	0.910916	0.0894842	421.233	140.636	14	2.0925	2	bad
CAATACAGAGT	NZ170	267051	50.7219	8	1.72454	0.233277	4.57317	4.55866	-11.0986	0.0471356	0.629446	0.363256	443.029	84.3219	14	4.32517	4	bad
CAATACAGAGT	NZ186	2410614	457.856	397	0.285916	0.124827	5.72684	5.7314	-11.0681	0.534643	0.271795	0.209321	6.31263	1.02703	3	5.70104	6	bad
CAATACAGAGT	NZ250	3324445	631.424	503	0.407233	0.190524	2.18948	2.21842	-9.20624	0.592386	0.473409	0.0266484	399.672	135.506	68	2.1924	2	good
CAATATGGTTC	MS157	1576018	299.339	8	1.55588	0.185842	4.17235	4.20216	-7.75641	0.211104	1.11182	9.90005	408.061	197.068	1	3.84292	1	bad
CAATATGGTTC	MS81	257845	48.9734	34	0.677934	0.0753376	1.94353	1.97291	-22.6475	0.156176	0.347489	0.0652039	345.715	134.992	31	1.96733	2	good
CAATATGGTTC	NZ169	4324070	821.286	634	0.354067	0.183372	2.10875	2.123	-53.0921	0.701881	0.449129	0.633616	278.954	96.2988	1	2.19582	2	good
CAATATGGTTC	NZ170	2068831	392.94	303	0.369612	0.116235	2.40167	2.41193	-15.6246	0.668317	0.416873	0.658089	181.399	55.7248	30	2.40076	2	good
CAATATGGTTC	NZ186	230600	43.7987	31	0.704701	0.107081	1.91211	1.93506	-80.5525	0.15406	0.368836	0.0653403	399.384	152.322	9	1.96733	2	good
CAATATGGTTC	NZ250	3449037	655.088	535	0.397378	0.187944	4.76187	4.78768	-6.63881	0.696602	0.617445	0.4835	243.005	43.9258	2	4.6925	4	bad
CAATTCACGCC	MS157	1928970	366.376	315	0.342952	0.0533343	1.81563	1.8445	-8.31798	0.500607	0.338851	0.0579033	244.724	103.929	14	1.81652	2	good
CAATTCACGCC	MS81	180575	34.2972	20	0.938413	0.0613367	1.94377	1.98038	58.1571	0.0944623	0.420489	0.0657008	465.417	174.302	17	1.97322	2	good
CAATTCACGCC	NZ169	4875239	925.971	678	0.351483	0.150189	2.89328	2.91795	-74.8933	0.784388	0.555599	1.08376	212.599	53.5188	3	3.06382	3	good
CAATTCACGCC	NZ170	886862	168.445	10	1.234	0.117459	3.49884	3.55448	13.5473	0.177786	0.582437	8.90857	535.216	283.187	2	6.11244	1	bad
CAATTCACGCC	NZ186	2788599	529.648	439	0.29928	0.182289	1.56128	1.46187	-5.17234	0.824434	0.486683	0.0588374	252.32	120.668	1	1.41121	1	good
CAATTCACGCC	NZ250	50420	9.57645	4	1.10056	0.20097	4.49292	4.50528	-4.33373	0.151611	0.878352	0.0590609	364.423	88.4317	0	3.24274	3	bad
CACCACGACTC	MS157	1257441	238.83	9	1.60445	0.114241	2.58573	2.60934	6.74445	0.179168	0.908057	0.428599	961.788	549.185	2	2.54055	1	bad
CACCACGACTC	MS81	269882	51.2596	26	1.09012	0.100844	2.15763	2.13811	12.6785	0.089647	0.416697	0.0130512	551.688	189.887	1	2.0925	2	bad
CACCACGACTC	NZ169	84363	16.0234	12	0.729727	0.157427	2.1838	2.21167	-8.55666	0.146084	0.538262	0.204771	791.055	265.827	15	2.21292	2	good
CACCACGACTC	NZ170	2884663	547.894	294	0.78347	0.147907	3.13982	3.14718	39.0129	0.354879	0.805753	0.702083	585.674	171.44	2	2.65679	2	bad
CACCACGACTC	NZ186	3092222	587.317	488	0.328608	0.0568906	1.91351	1.91694	-7.48177	0.457395	0.268093	0.0631466	45.6925	18.1473	9	1.9075	2	good
CACCACGACTC	NZ250	58294	11.072	8	0.693039	0.16858	2.10354	2.13074	-4.13612	0.125508	0.643557	0.130662	835.464	296.719	29	2.05945	2	bad
CACGAGACCTG	MS157	1985738	377.158	332	0.324653	0.123674	1.97561	1.97621	-7.26485	0.517362	0.300544	0.0716098	117.148	44.4197	4	1.94625	2	good
CACGAGACCTG	MS81	2964657	563.088	494	0.31306	0.12538	1.96121	1.95943	-11.7989	0.383448	0.268225	0.0530709	122.957	47.4146	16	1.9472	2	good
CACGAGACCTG	NZ169	4624297	878.309	652	0.365419	0.14906	1.87196	1.86185	-2.41954	0.901748	0.76044	0.540641	308.116	155.961	3	1.45014	1	bad
CACGAGACCTG	NZ170	2390776	454.089	367	0.352114	0.0750723	2.12367	2.15831	-17.8525	0.646478	0.408057	0.544203	202.391	69.9027	14	2.17113	2	good
CACGAGACCTG	NZ186	3107922	590.299	392	0.704765	0.184681	2.85943	2.89311	-26.1032	0.505651	1.4936	0.203556	708.617	231	63	2.07787	2	bad
CACGAGACCTG	NZ250	5088371	966.452	803	0.366378	0.131516	1.68263	1.69282	-5.32457	0.795302	0.62634	0.227691	676.987	294.282	0	1.59943	2	good
CACGTGCTACG	MS157	1135808	215.728	155	0.394936	0.0591515	1.60644	1.6352	-8.36115	0.692764	0.469304	0.0529656	451.256	191.942	0	1.62089	2	good
CACGTGCTACG	MS81	5493248	1043.35	793	0.358364	0.137187	1.96961	1.9792	-14.0723	0.429384	0.316929	0.0547403	214.686	81.8756	3	1.96391	2	good
CACGTGCTACG	NZ169	489836	93.0363	11	0.974483	0.0808572	1.66599	1.70775	-11.0905	0.165892	0.578738	7.49594	1252.05	658.724	4	2.86781	1	bad
CACGTGCTACG	NZ170	1830087	347.595	259	0.384747	0.0769434	2.20916	2.2004	-14.6994	0.665502	0.444042	0.644789	266.767	85.5284	4	2.23229	2	good
CACGTGCTACG	NZ186	2844016	540.174	31	0.975845	0.186081	2.45453	2.33866	5.18607	0.528399	0.978608	0.0163246	465.197	416.084	0	1.42469	0	bad
CACGTGCTACG	NZ250	53088	10.0832	4	0.967187	0.148355	1.88448	1.85449	-6.18358	0.23039	1.02699	0.070324	1108.84	560.415	0	1.46629	1	bad
CACTCCGTTGC	MS157	1570423	298.276	16	1.17306	0.178651	4.77318	4.74645	-7.68858	0.270021	3.1948	0.186944	311.492	175.325	6	1.46572	0	bad
CACTCCGTTGC	MS81	3965404	753.163	639	0.316026	0.0785056	1.97771	1.99435	-12.2254	0.516009	0.297981	0.0585316	201.146	75.6088	2	1.96543	2	good
CACTCCGTTGC	NZ169	2847673	540.869	440	0.340084	0.119348	2.15579	2.20015	-23.558	0.677041	0.424383	0.614225	302.309	103.631	71	2.23362	2	good
CACTCCGTTGC	NZ170	393792	74.7943	12	1.70445	0.0918847	5.33535	5.34735	48.5561	0.120928	0.675767	0.370997	321.319	54.5303	28	5.03552	5	bad
CACTCCGTTGC	NZ186	2267295	430.635	32	1.11164	0.161102	8.47248	8.50026	5.16776	0.477199	1.06184	1.41738	135.352	61.659	11	5.74777	1	bad
CACTCCGTTGC	NZ250	2601935	494.195	413	0.352842	0.159531	1.85938	1.9118	-8.37678	0.734211	0.556962	0.195199	516.096	205.983	3	1.86667	2	good
CACTGGAATTA	MS157	1619094	307.52	275	0.289966	0.0563748	1.96664	1.96454	-7.05108	0.457084	0.239814	0.0676669	46.8546	18.2677	20	1.94625	2	good
CACTGGAATTA	MS81	747246	141.927	110	0.381869	0.102274	1.96027	1.96289	-18.7958	0.341878	0.332686	0.065415	269.478	102.241	4	1.96942	2	good
CACTGGAATTA	NZ169	4363599	828.794	668	0.335295	0.106469	2.36085	2.35494	-22.1221	0.707923	0.42442	0.678843	192.643	58.347	47	2.39392	2	good
CACTGGAATTA	NZ170	296589	56.3322	9	1.69221	0.221264	2.17013	2.2234	-69.12	0.0802257	0.647382	0.0761075	675.44	242.522	24	2.01197	2	bad
CACTGGAATTA	NZ186	3891893	739.201	27	1.72043	0.0480429	1.29283	1.32286	3.03813	0.208517	0.490607	0.0204645	1476.22	820.026	21	1.92137	1	bad
CACTGGAATTA	NZ250	4123850	783.257	581	0.401986	0.133394	1.97648	2.00148	-13.0353	0.662834	0.449229	0.203336	270.788	101.696	2	2.01538	2	good
CAGACACGCTT	MS157	36370	6.90788	2	1.64933	0.142213	9.17087	9.18364	-658.129	0.0706448	1.8017	0.397368	298.558	40.0592	4	5.67939	6	bad
CAGACACGCTT	MS81	342260	65.0066	52	0.37695	0.116024	1.94757	1.95792	-12.4033	0.2833	0.335963	0.0646367	323.766	119.284	37	1.95499	2	good
CAGACACGCTT	NZ169	1397727	265.475	203	0.392177	0.201257	3.87557	3.89889	-4.38254	0.711968	0.616886	1.03113	160.609	39.6078	0	3.59601	3	bad
CAGACACGCTT	NZ170	740795	140.702	82	0.447888	0.141788	1.40435	1.44007	-4.51954	0.684808	0.989159	0.587142	1539.24	631.585	12	1.56714	2	bad
CAGACACGCTT	NZ186	1082331	205.571	171	0.377737	0.13181	1.89397	1.90359	-13.2755	0.391693	0.349569	0.0523041	350.078	135.54	19	1.89117	2	good
CAGACACGCTT	NZ250	42808	8.13067	4	1.12918	0.169415	2.69439	2.74379	-11.8286	0.0582207	1.49652	0.213895	772.111	271.121	0	1.94112	2	bad
CAGAGTGTACG	MS157	883618	167.829	142	0.324408	0.171086	1.96603	1.96893	-8.85441	0.445435	0.279977	0.0677092	66.6619	25.7642	32	1.94492	2	good
CAGAGTGTACG	MS81	2151679	408.676	336	0.336352	0.108817	1.98293	2.01233	-11.6716	0.498696	0.302602	0.0530248	225.357	85.0745	3	1.98405	2	good
CAGAGTGTACG	NZ169	2614419	496.566	42	0.768211	0.144962	3.02936	2.98662	14.4152	0.509746	1.83005	-0.18695	586.118	507.168	0	1.45394	0	bad
CAGAGTGTACG	NZ170	1267593	240.758	178	0.425724	0.164183	3.60554	3.58228	-8.16403	0.727476	0.752044	1.05798	372.945	85.7912	0	3.63514	2	bad
CAGAGTGTACG	NZ186	150910	28.6629	10	1.27003	0.147777	2.00023	2.0395	-14.3025	0.164373	0.566867	0.245423	887.022	319.729	20	2.31833	2	bad
CAGAGTGTACG	NZ250	37860	7.19088	2	1.46688	0.158612	1.96817	1.95841	-16.0866	0.0404185	1.22843	0.0409036	1044.31	384.053	3	1.82944	2	bad
CAGTACTCGAT	MS157	68296	12.9717	4	1.40729	0.155106	6.97504	6.93543	-3.72679	0.144347	0.993795	0.252318	318.296	55.8056	5	5.28699	5	bad
CAGTACTCGAT	MS81	3979146	755.773	654	0.335683	0.0600448	1.97628	1.98255	-11.3578	0.38854	0.283601	0.0530709	206.228	78.2285	8	1.9472	2	good
CAGTACTCGAT	NZ169	71399	13.5611	10	0.812042	0.0929585	2.03968	2.02373	-8.35264	0.0525271	0.538671	0.146363	811.653	287.008	65	2.04027	2	bad
CAGTACTCGAT	NZ170	877056	166.582	16	1.48463	0.138983	2.66094	2.67617	4.0341	0.276275	0.867808	1.27138	653.812	350.799	1	2.30275	1	bad
CAGTACTCGAT	NZ186	3100011	588.796	486	0.321568	0.115379	1.68384	1.65512	-9.775	0.622111	0.390383	0.0610052	182.707	81.693	25	1.67578	2	good
CAGTACTCGAT	NZ250	3515790	667.766	532	0.359959	0.205777	3.28865	3.31097	-11.8729	0.678515	0.449378	0.355275	200.316	48.8118	2	3.35309	3	bad
CATAGATGAGA	MS157	116536	22.1341	4	1.65566	0.116242	2.81728	2.80434	-3.25621	0.148699	0.902	0.0846784	784.576	267.098	21	2.13941	2	bad
CATAGATGAGA	MS81	151383	28.7527	12	1.29571	0.12611	2.01263	2.02858	-13.2444	0.0509248	0.526373	0.012133	769.768	275.068	55	2.02013	2	bad
CATAGATGAGA	NZ169	2647391	502.828	380	0.365135	0.0942174	2.2566	2.30932	-17.2302	0.704501	0.440736	0.598744	222.295	70.5133	2	2.32631	2	good
CATAGATGAGA	NZ170	261028	49.578	6	1.7697	0.182783	2.16715	2.17751	-7.30311	0.0617503	0.662066	0.0667211	828.203	293.639	11	2.02013	2	bad
CATAGATGAGA	NZ186	2016656	383.031	305	0.373046	0.159749	1.68905	1.68119	-6.55443	0.622292	0.444305	0.0781328	387.999	166.408	8	1.71149	2	good
CATAGATGAGA	NZ250	28621	5.43609	2	1.0159	0.190202	8.83214	8.81871	-53.9387	0.302903	1.79153	0.420233	341.891	66.3726	1	6.02868	3	bad
CATATGTCATC	MS157	1601603	304.198	263	0.313047	0.095692	1.93706	1.95264	-9.96986	0.425852	0.289594	0.0784329	127.206	50.2431	12	1.95745	2	good
CATATGTCATC	MS81	306384	58.1926	34	0.919803	0.0739608	1.94337	1.94529	13.4157	0.081749	0.383217	0.0530709	498.756	184.638	9	1.9472	2	good
CATATGTCATC	NZ169	4683658	889.584	697	0.339317	0.109711	2.40917	2.43319	-17.1447	0.699207	0.404222	0.60397	160.182	50.6046	13	2.43609	2	good
CATATGTCATC	NZ170	2107625	400.309	42	0.95282	0.205986	10.0194	10.0488	12.8961	0.484432	1.53648	0.574498	183.07	71.6913	16	5.93333	1	bad
CATATGTCATC	NZ186	2307334	438.24	38	1.60382	0.0910047	1.19762	1.2123	4.05789	0.24766	0.454931	1.11468	1694.92	920.681	20	1.90446	1	bad
CATATGTCATC	NZ250	61040	11.5935	2	1.64276	0.14279	4.41671	4.4598	-5.06444	0.0587914	1.08548	0.127163	459.78	99.6906	0	3.79335	4	bad
CATATTCGTTG	MS157	92715	17.6097	4	1.62438	0.121151	6.61874	6.63343	-3.46378	0.108388	0.933474	0.291508	327.345	54.8517	46	5.32593	5	bad
CATATTCGTTG	MS81	5026688	954.737	776	0.368515	0.195531	3.42478	3.41346	-39.0668	0.43538	0.367859	0.015707	226.794	54.7896	2	3.44255	3	bad
CATATTCGTTG	NZ169	1430666	271.731	16	1.70903	0.11404	3.01152	3.00023	3.3899	0.101847	0.875667	0.25671	368.969	131.866	4	2.02545	2	bad
CATATTCGTTG	NZ170	2339448	444.34	34	0.523196	0.0696282	2.89417	2.85698	139.669	0.840496	1.99116	0.0383078	561.012	238.296	33	1.51871	0	bad
CATATTCGTTG	NZ186	2593711	492.633	430	0.432495	0.174462	5.0487	5.0319	-3.17023	0.578872	0.538391	0.300209	168.572	35.5619	49	4.54112	4	bad
CATATTCGTTG	NZ250	3789327	719.72	585	0.337001	0.0819502	1.98751	2.01401	-11.4301	0.718103	0.401571	0.201386	164.974	62.2009	5	2.01311	2	good
CATCACTCTTA	MS157	36240	6.88319	2	1.68052	0.189647	6.94607	6.88179	50.0591	0.0507094	1.93851	0.289854	321.863	69.2185	0	3.6471	4	bad
CATCACTCTTA	MS81	3105357	589.811	466	0.34114	0.120796	1.95799	1.98375	-21.8738	0.500693	0.30934	0.0548816	246.897	91.1849	0	1.97227	2	good
CATCACTCTTA	NZ169	2468906	468.928	397	0.345052	0.141421	2.6185	2.61033	-3.37882	0.856028	0.744375	0.348894	309.712	97.2334	8	2.28091	2	bad
CATCACTCTTA	NZ170	436545	82.9145	9	1.67836	0.184907	2.95649	2.9182	11.2146	0.112021	0.830381	0.391961	568.383	197.121	5	2.19069	2	bad
CATCACTCTTA	NZ186	1292042	245.402	205	0.334173	0.0423627	1.97023	1.96705	-9.21435	0.385454	0.271243	0.060293	99.4095	38.5551	0	1.9472	2	good
CATCACTCTTA	NZ250	19001	3.60893	2	1.21562	0.182803	3.70953	3.67246	-43.2605	0.104618	1.42943	0.290483	565.764	152.168	0	2.86249	3	bad
CATGCAGCTCT	MS157	491135	93.283	68	0.450994	0.106609	1.96836	2.00846	-8.35999	0.358027	0.385169	0.0757408	429.218	163.375	9	1.97607	2	good
CATGCAGCTCT	MS81	4881768	927.211	769	0.324114	0.0699887	1.97552	2.00171	-16.0313	0.465124	0.283295	0.0647495	217.517	82.3982	0	1.97436	2	good
CATGCAGCTCT	NZ169	2845837	540.52	92	0.392873	0.117874	4.78273	4.77466	-145.45	0.884612	2.8755	1.44327	356.563	119.27	15	2.85071	0	bad
CATGCAGCTCT	NZ170	1632213	310.012	233	0.37787	0.101626	2.14519	2.15677	-22.8972	0.638798	0.427382	0.665263	264.744	90.2639	5	2.19658	2	good
CATGCAGCTCT	NZ186	2144294	407.273	326	0.434818	0.228668	5.91469	5.884	-4.32657	0.552208	0.508166	0.171136	197.42	33.6836	12	5.6547	5	bad
CATGCAGCTCT	NZ250	1596033	303.14	223	0.438694	0.088767	1.9831	1.96355	-14.8818	0.572772	0.460117	0.165326	410.291	145.674	16	1.97322	2	good
CATGGCCTGGT	MS157	114596	21.7656	2	1.76236	0.171651	3.5925	3.65927	78.2878	0.0379082	2.02581	0.151627	629.642	217.607	0	1.99411	2	bad
CATGGCCTGGT	MS81	1571735	298.525	255	0.337034	0.211219	3.31783	3.34664	-15.0103	0.443715	0.330409	0.0902514	104.152	25.2095	1	3.30769	3	bad
CATGGCCTGGT	NZ169	434619	82.5487	8	1.39856	0.119336	6.84319	6.81062	-9.31708	0.199991	1.2651	6.3086	256.292	100.016	5	4.54112	2	bad
CATGGCCTGGT	NZ170	167770	31.8651	6	1.55229	0.151454	8.87218	8.8698	-6.30011	0.045167	1.15387	0.457686	151.103	24.2071	16	5.39278	5	bad
CATGGCCTGGT	NZ186	352083	66.8724	8	1.49024	0.135396	1.59651	1.53901	13.3495	0.157857	0.752597	0.201478	1338.96	685.929	6	1.45755	1	bad
CATGGCCTGGT	NZ250	17789	3.37873	2	0.908989	0.141767	5.15953	5.20025	-19.7409	0.102147	1.24072	0.244182	486.337	100.405	12	4.22013	4	bad
CATGGTGGAAC	MS157	135181	25.6754	22	0.467137	0.0654705	1.94507	1.93784	-7.57191	0.25806	0.420092	0.067668	616.255	233.393	1	1.9472	2	bad
CATGGTGGAAC	MS81	67984	12.9124	8	0.827754	0.071734	2.04163	2.05584	-6.23538	0.0465687	0.573876	0.0652039	807.142	295.92	0	1.96733	2	bad
CATGGTGGAAC	NZ169	511206	97.0952	10	1.09929	0.171585	8.5186	8.51977	-6.38421	0.299015	1.81719	4.20336	217.03	66.5148	8	4.44103	1	bad
CATGGTGGAAC	NZ170	399070	75.7968	61	0.435999	0.178939	2.73058	2.7334	-14.1907	0.270824	0.421833	-0.0620094	370.223	105.935	8	2.74758	3	bad
CATGGTGGAAC	NZ186	526883	100.073	83	0.370642	0.0911759	1.95406	1.94417	-10.0952	0.323235	0.309122	0.0566044	256.299	100.502	2	1.93865	2	good
CATGGTGGAAC	NZ250	27349	5.19449	4	0.792204	0.179815	2.91811	2.94567	-5.32633	0.0596724	0.89742	0.107519	754.761	211.968	0	2.72896	3	bad
CATTAATGCAC	MS157	91537	17.3859	8	1.18074	0.146838	2.01396	2.03655	-5.89728	0.0939885	0.61649	0.0675936	900.091	329.305	22	1.95973	2	bad
CATTAATGCAC	MS81	330289	62.733	23	1.32665	0.0678535	2.01889	2.0381	15.1299	0.0521262	0.399219	0.012133	536.447	196.167	6	2.02013	2	bad
CATTAATGCAC	NZ169	5130993	974.548	790	0.341327	0.0901865	2.24023	2.23117	-14.1919	0.674478	0.386836	0.541429	137.152	44.4546	59	2.2321	2	good
CATTAATGCAC	NZ170	2935206	557.494	196	0.456389	0.125666	3.54756	3.60293	-40.7843	0.824765	2.48259	0.80598	459.168	134.553	20	2.28794	0	bad
CATTAATGCAC	NZ186	284822	54.0972	27	1.05112	0.0948259	1.98947	1.98398	14.8294	0.140419	0.395103	0.0460219	483.932	178.763	29	1.98424	2	good
CATTAATGCAC	NZ250	4726314	897.685	693	0.381141	0.0914916	1.94636	1.98309	-13.9119	0.563998	0.361747	0.196089	236.563	93.6762	0	2.03381	2	good
CATTCGACGTT	MS157	1355761	257.504	215	0.328423	0.0936123	1.93027	1.97508	-8.19657	0.461451	0.278799	0.0648668	82.1227	32.3084	0	1.92972	2	good
CATTCGACGTT	MS81	6321116	1200.59	1017	0.333104	0.0779894	2.06016	2.04049	-24.5985	0.486804	0.326977	0.0667601	318.712	116.075	4	2.03666	2	good
CATTCGACGTT	NZ169	788458	149.755	11	0.826636	0.157761	0.795332	0.818573	-10.6815	0.244675	0.54627	2.27198	2474.62	2374.64	1	1.33675	0	bad
CATTCGACGTT	NZ170	1824407	346.516	268	0.385718	0.117177	2.25094	2.24061	-13.6352	0.648131	0.459046	0.631882	363.243	119.357	19	2.23476	2	good
CATTCGACGTT	NZ186	2729564	518.436	33	1.10191	0.134115	8.22267	8.27898	6.19505	0.441501	1.09714	2.72286	113.242	55.9562	3	4.65375	1	bad
CATTCGACGTT	NZ250	57716	10.9622	2	1.38878	0.134313	3.47902	3.47664	-24.8311	0.217267	1.7034	-0.242307	658.225	223.174	17	2.63077	1	bad
CCAAGACCTTA	MS157	635605	120.723	100	0.337447	0.0876906	3.24492	3.24904	-9.21837	0.505452	0.373766	0.0978053	93.6104	25.847	8	3.25812	3	good
CCAAGACCTTA	MS81	1492902	283.552	211	0.371582	0.0756618	1.97367	1.96925	-14.7889	0.428761	0.305155	0.0588284	232.396	85.9449	10	1.94321	2	good
CCAAGACCTTA	NZ169	1980821	376.224	271	0.42139	0.0896291	2.91854	2.91882	-2.43649	0.809378	0.779634	0.284607	307.502	113.728	3	2.22792	2	bad
CCAAGACCTTA	NZ170	996018	189.177	21	0.594673	0.193576	2.8047	2.77561	-20.1642	0.604427	1.8405	0.530025	631.929	438.068	23	1.67787	0	bad
CCAAGACCTTA	NZ186	1357108	257.76	210	0.358408	0.0456649	1.88849	1.87839	-8.42492	0.419586	0.295944	0.0574393	125.459	51.6214	37	1.88737	2	good
CCAAGACCTTA	NZ250	22060	4.18993	0	1.61188	0.0592608	3.6071	3.63689	13.0613	0.111387	1.23081	0.126705	214.398	61.5317	3	1.89402	1	bad
CCAAGGCAAGC	MS157	453042	86.0479	3	1.60455	0.205969	1.59642	1.64775	-3.64716	0.0890757	1.10233	2.26049	1601.1	1490.58	7	1.29915	0	bad
CCAAGGCAAGC	MS81	4266651	810.38	626	0.370643	0.188327	3.78046	3.81232	-10.6029	0.606703	0.41976	0.115788	123.478	26.1492	0	3.78329	4	bad
CCAAGGCAAGC	NZ169	81695	15.5166	11	0.757329	0.188665	5.92875	5.9293	-13.0348	0.108777	0.560621	0.886974	240.496	35.9425	20	5.76619	6	bad
CCAAGGCAAGC	NZ170	1333462	253.269	125	0.390192	0.103411	3.73924	3.7406	-22.4423	0.84233	2.39615	0.4598	394.151	75.8321	35	2.43894	0	bad
CCAAGGCAAGC	NZ186	2004668	380.754	335	0.291503	0.134791	1.90721	1.94447	-8.13094	0.559446	0.30025	0.0649201	109.86	45.2526	9	1.93048	2	good
CCAAGGCAAGC	NZ250	10595	2.01235	2	1.26248	0.101703	5.11101	5.1795	61.185	0.0332061	1.42148	0.179886	460.027	95.7529	0	3.49117	4	bad
CCAATTGTCCA	MS157	1593567	302.672	260	0.332265	0.0494878	1.967	1.96497	-7.86651	0.427137	0.282743	0.0676069	138.35	53.6564	14	1.94587	2	good
CCAATTGTCCA	MS81	3737178	709.815	622	0.326644	0.101524	2.00168	2.02786	-10.9514	0.500084	0.328108	0.05667	296.666	112.352	0	1.97797	2	good
CCAATTGTCCA	NZ169	58884	11.184	9	0.643519	0.137535	2.04915	2.04061	-5.8418	0.105497	0.587461	0.198965	862.954	308.065	1	2.04577	2	bad
CCAATTGTCCA	NZ170	1930082	366.587	266	0.430431	0.158269	4.22785	4.2286	-5.382	0.666734	0.582371	0.749934	256.506	55.2748	1	4.04425	5	bad
CCAATTGTCCA	NZ186	1830835	347.737	44	1.60993	0.113433	2.90929	2.90267	3.34429	0.1073	0.851824	0.0569216	519.456	181.956	0	2.05622	2	bad
CCAATTGTCCA	NZ250	1465407	278.33	10	1.65263	0.130443	6.51002	6.46471	15.8878	0.195737	1.19909	-0.0761721	200.727	47.073	6	3.7339	3	bad
CCACACAACAT	MS157	1975113	375.14	14	1.26761	0.103358	4.10079	4.03257	-10.6372	0.305871	2.30946	0.143434	283.858	180.998	11	1.42317	0	bad
CCACACAACAT	MS81	4792705	910.295	663	0.581505	0.0983846	1.94977	1.95821	-15.022	0.206498	0.554378	0.066426	858.228	308.068	0	1.95726	2	bad
CCACACAACAT	NZ169	1351470	256.689	31	1.55495	0.159825	4.296	4.30025	29.0054	0.120425	1.72596	0.54632	380.327	157.202	0	1.96961	1	bad
CCACACAACAT	NZ170	1455676	276.482	213	0.376276	0.115486	2.07576	2.12299	-24.7202	0.644043	0.448294	0.612696	289.777	101.436	34	2.1793	2	good
CCACACAACAT	NZ186	501177	95.1903	18	1.38031	0.0708973	1.15616	1.17969	11.3237	0.271069	0.490628	0.379511	1608.99	886.353	21	1.88604	1	bad
CCACACAACAT	NZ250	1384396	262.943	8	1.78315	0.11125	6.22414	6.25985	52.5299	0.124092	0.892864	0.204408	361.271	64.3838	0	4.76714	5	bad
CCACTCGTAGC	MS157	2385502	453.087	13	1.60469	0.176714	12.4101	12.415	15.0736	0.186384	1.35388	1.15917	102.407	22.54	4	5.73846	3	bad
CCACTCGTAGC	MS81	6636283	1260.45	1002	0.349621	0.0744805	2.00407	1.99798	-7.92289	0.46074	0.274989	0.0530709	131.726	50.9381	2	1.9472	2	good
CCACTCGTAGC	NZ169	77972	14.8095	12	0.603845	0.20536	4.76029	4.82622	-8.06384	0.166856	0.557918	0.457097	329.462	59.2841	17	4.89801	4	bad
CCACTCGTAGC	NZ170	841145	159.762	21	1.54074	0.167964	3.11279	3.1485	5.62824	0.165484	0.881448	0.654502	565.618	183.439	2	2.37569	2	bad
CCACTCGTAGC	NZ186	4059215	770.981	57	0.895438	0.162245	3.39222	3.31267	21.1602	0.608004	1.8491	0.221349	498.316	306.561	2	1.57721	0	bad
CCACTCGTAGC	NZ250	3650606	693.372	450	0.460636	0.207337	1.94531	1.96287	-3.81023	0.668411	0.590012	0.191207	596.011	234.96	28	1.79392	2	bad
CCATTATGGTA	MS157	1666884	316.597	73	1.00903	0.203209	3.52652	3.52025	-10.1834	0.346989	2.58009	0.160364	608.965	337.013	11	1.39411	0	bad
CCATTATGGTA	MS81	5117011	971.892	854	0.317549	0.0901761	1.96338	1.96203	-14.0585	0.405053	0.29156	0.0530709	176.576	69.0041	15	1.9472	2	good
CCATTATGGTA	NZ169	3460837	657.329	502	0.369425	0.182658	3.94167	3.96498	-8.76201	0.737052	0.441839	1.09755	100.46	21.4159	9	3.95537	4	bad
CCATTATGGTA	NZ170	1320055	250.723	179	0.66089	0.151746	2.31859	2.33251	244.986	0.371893	0.553498	0.677194	507.545	169.063	14	2.2528	2	good
CCATTATGGTA	NZ186	2483040	471.613	416	0.273555	0.0580985	1.80545	1.83531	-7.97524	0.641561	0.286836	0.0771611	59.0147	24.0463	6	1.82146	2	good
CCATTATGGTA	NZ250	60398	11.4716	6	0.993957	0.218563	2.38154	2.43864	-5.10237	0.180221	0.759333	0.0338265	847.086	306.145	6	2.22146	2	bad
CCGAACCTATG	MS157	43835	8.32574	5	1.05833	0.0849863	2.26299	2.26749	-3.66559	0.082162	0.692036	0.0732545	995.384	367.351	3	1.96733	2	bad
CCGAACCTATG	MS81	6178129	1173.43	964	0.337293	0.0637038	1.96047	1.96334	-17.4382	0.423336	0.302867	0.0530709	240.599	89.5565	3	1.9472	2	good
CCGAACCTATG	NZ169	96420	18.3134	15	0.566117	0.160082	2.26103	2.29081	-9.4999	0.201123	0.526402	0.20061	673.005	217.899	58	2.32118	2	bad
CCGAACCTATG	NZ170	2161578	410.556	24	0.496266	0.0658169	1.23702	1.22549	3.35037	0.700799	0.75943	-0.00284986	1790.48	2039.83	23	1.58594	0	bad
CCGAACCTATG	NZ186	2984828	566.919	462	0.392006	0.153457	3.23441	3.24669	-3.75913	0.678974	0.599914	0.0684946	271.636	77.6237	29	3.05907	3	bad
CCGAACCTATG	NZ250	4455543	846.257	685	0.362731	0.11375	1.99271	2.00717	-9.97123	0.653826	0.423089	0.200297	241.813	94.9617	3	1.99848	2	good
CCGACGCAGAA	MS157	72262	13.725	6	1.27157	0.108694	2.81473	2.81769	-3.6772	0.0483378	1.13442	0.0773935	648.597	228.757	5	2.00893	2	bad
CCGACGCAGAA	MS81	1509277	286.662	237	0.309515	0.0564997	1.97722	1.97179	-11.8122	0.365956	0.261901	0.0530709	135.08	52.4289	0	1.9472	2	good
CCGACGCAGAA	NZ169	3617784	687.138	168	1.24554	0.16186	7.65989	7.59459	152.053	0.262229	2.07748	1.63237	277.774	73.3928	4	3.9151	3	bad
CCGACGCAGAA	NZ170	819790	155.706	18	1.62038	0.175338	2.66968	2.6822	3.78858	0.164294	0.726828	0.349382	499.095	172.759	24	2.21387	2	bad
CCGACGCAGAA	NZ186	4657125	884.544	313	1.18554	0.173176	10.1389	10.1558	-139.493	0.192722	2.0885	0.214802	200.336	34.2494	24	5.5094	6	bad
CCGACGCAGAA	NZ250	43902	8.33846	2	1.19095	0.125744	2.95384	2.99883	-116.894	0.273043	2.06612	0.0954108	812.905	403.116	0	1.52498	1	bad
CCGCATGACGA	MS157	19406	3.68585	2	1.39117	0.148837	2.72251	2.74777	306.843	0.109839	1.61255	0.0665969	784.881	281.258	0	1.87711	2	bad
CCGCATGACGA	MS81	31508	5.98443	4	0.988892	0.210186	4.05606	4.06961	-3.431	0.0577889	0.756701	0.0616745	488.353	107	13	3.7113	4	bad
CCGCATGACGA	NZ169	12679	2.40817	2	1.05986	0.137421	5.4866	5.52367	-50.3791	0.0398622	1.37769	0.770879	460.368	77.0111	2	5.08186	4	bad
CCGCATGACGA	NZ170	359235	68.2308	54	0.422189	0.0688445	2.15212	2.1701	-8.62141	0.524043	0.505936	0.444193	405.735	134.13	1	2.166	2	good
CCGCATGACGA	NZ186	311843	59.2294	50	0.409841	0.0737038	1.87507	1.89406	-7.92266	0.287676	0.391103	0.0684543	478.354	189.197	0	1.91719	2	good
CCGCATGACGA	NZ250	19474	3.69877	2	0.869159	0.224393	3.68589	3.71523	-9.6505	0.0986892	1.06602	0.293578	604.412	136.584	12	3.58613	4	bad
CCGCTAACACA	MS157	986354	187.342	160	0.351258	0.0514582	1.95403	1.95436	-8.32417	0.40671	0.306423	0.067668	163.342	63.2276	0	1.9472	2	good
CCGCTAACACA	MS81	3684353	699.782	575	0.653709	0.146451	2.05859	2.07108	-27.4597	0.191481	0.656344	0.0553817	922.344	324.133	1	2.0076	2	bad
CCGCTAACACA	NZ169	38354	7.28471	6	0.693852	0.15248	2.03089	2.10417	-4.52173	0.082943	0.662485	0.147284	963.38	340.773	1	2.03286	2	bad
CCGCTAACACA	NZ170	1044082	198.306	158	0.359668	0.173061	4.73934	4.75775	-20.8387	0.64752	0.45835	1.4403	103.58	19.507	12	4.81766	4	bad
CCGCTAACACA	NZ186	1633899	310.332	273	0.302363	0.0721722	1.92674	1.95395	-6.45839	0.524063	0.261656	0.0612419	77.1792	31.2168	0	1.92308	2	good
CCGCTAACACA	NZ250	14870	2.82431	2	0.956422	0.152499	3.67625	3.71577	-24.6293	0.0638172	1.22349	0.0814237	540.25	123.236	1	3.61368	4	bad
CCGGCGTCATA	MS157	1638926	311.287	268	0.303722	0.0627805	1.97339	1.97852	-6.90357	0.466299	0.245754	0.0666888	25.5394	9.77727	1	1.95708	2	good
CCGGCGTCATA	MS81	197205	37.4558	19	1.0933	0.0929	2.01733	2.04499	-46.3399	0.0971521	0.466193	0.012133	682.45	240.395	5	2.02013	2	bad
CCGGCGTCATA	NZ169	61767	11.7316	9	0.644729	0.165006	2.01947	2.04186	-5.72854	0.110945	0.604096	0.194671	909.26	324.77	1	2.00969	2	bad
CCGGCGTCATA	NZ170	1611413	306.061	231	0.379829	0.161313	2.1375	2.14049	-13.4927	0.678563	0.461975	0.624221	306.518	104.27	18	2.16049	2	good
CCGGCGTCATA	NZ186	2354243	447.15	361	0.356436	0.190194	2.52599	2.52229	-9.3819	0.626905	0.390536	0.0443503	175.419	56.0085	21	2.49554	3	good
CCGGCGTCATA	NZ250	45266	8.59753	4	1.21146	0.155841	5.93286	5.99385	-4.27331	0.159374	1.00531	0.0190405	342.453	62.8245	1	5.02184	4	bad
CCGGTCCAAGT	MS157	1610293	305.849	138	0.962581	0.159707	2.91144	2.92136	-3.50454	0.289718	1.62754	0.0804489	818.257	264.626	2	2.16315	2	bad
CCGGTCCAAGT	MS81	163785	31.1083	16	1.07213	0.0876712	1.93583	1.96593	-32.8405	0.115671	0.447038	0.0652039	617.383	223.558	5	1.96733	2	bad
CCGGTCCAAGT	NZ169	85935	16.3219	6	1.28938	0.189346	2.04258	2.06675	-4.78163	0.107569	0.672867	0.11024	964.714	352.645	6	1.98101	2	bad
CCGGTCCAAGT	NZ170	1565365	297.315	224	0.382285	0.162514	2.05196	2.05281	-9.13593	0.747786	0.465777	0.503252	292.216	106.18	4	2.04084	2	good
CCGGTCCAAGT	NZ186	2127621	404.107	18	1.25139	0.182018	1.61448	1.49385	2.71726	0.47889	0.844228	0.108498	1403.11	1366.88	2	1.46515	0	bad
CCGGTCCAAGT	NZ250	2232877	424.098	298	0.428744	0.167176	2.07941	2.08797	-4.10549	0.770815	0.524242	0.242552	264.534	103.069	0	1.89459	2	good
CCGTCTTCCAG	MS157	1926392	365.886	322	0.326394	0.0496453	1.96112	1.97423	-6.95808	0.446047	0.272965	0.0712354	97.6739	37.363	1	1.95252	2	good
CCGTCTTCCAG	MS81	3185974	605.123	520	0.376545	0.0827541	1.9548	1.93881	-11.7056	0.323892	0.338129	0.0530709	430.195	163.093	37	1.9472	2	good
CCGTCTTCCAG	NZ169	1427397	271.111	13	1.34437	0.149208	4.89742	4.98498	4.08362	0.189043	0.855907	49.1146	456.172	244.666	4	5.58538	1	bad
CCGTCTTCCAG	NZ170	323018	61.3519	9	1.73172	0.169219	2.14833	2.15082	-48.7986	0.0641848	0.681988	0.182614	953.259	340.996	0	2.00114	2	bad
CCGTCTTCCAG	NZ186	954900	181.368	18	1.75275	0.105998	2.2497	2.27678	3.87371	0.0512895	0.555461	0.00504734	601.002	217.287	18	2.02013	2	bad
CCGTCTTCCAG	NZ250	4193364	796.46	694	0.325304	0.0589027	1.97771	1.98135	-9.35992	0.277787	0.245888	0	63.1182	24.5512	9	2	2	good
CCTCACAGACC	MS157	1077051	204.568	146	0.447537	0.144668	4.41025	4.39338	-4.93796	0.584141	0.616811	0.186064	308.134	65.7757	10	4.23571	4	bad
CCTCACAGACC	MS81	162921	30.9442	22	0.665194	0.132388	1.93465	1.94844	-26.9973	0.133395	0.391705	0.0530709	543.485	206.38	3	1.9472	2	bad
CCTCACAGACC	NZ169	4153893	788.964	634	0.390637	0.0954102	2.396	2.4048	-13.3999	0.605675	0.470516	0.565435	381.11	127.654	1	2.40304	2	good
CCTCACAGACC	NZ170	406436	77.1958	11	1.71281	0.13599	2.16985	2.19104	27.7763	0.0739682	0.570803	0.102227	761.151	274.319	47	2.06686	2	bad
CCTCACAGACC	NZ186	2366846	449.543	398	0.279359	0.156867	5.85579	5.86545	-7.72382	0.656806	0.287292	0.27594	1.91203	0.291907	6	5.76942	6	bad
CCTCACAGACC	NZ250	73094	13.883	6	0.927545	0.17572	7.48766	7.47212	-3.82232	0.230711	0.936931	0.265103	228.426	38.4419	2	5.31168	6	bad
CCTCTGTGTGT	MS157	580999	110.351	3	1.35224	0.0987319	1.77926	1.73761	-3.49826	0.187727	1.15353	0.641988	1239.69	1296.22	9	1.3962	0	bad
CCTCTGTGTGT	MS81	3000882	569.968	471	0.347964	0.0953165	1.97491	1.96384	-11.8666	0.370938	0.279964	0.0550975	194.922	73.5502	9	1.95024	2	good
CCTCTGTGTGT	NZ169	57170	10.8585	9	0.675319	0.15102	3.37514	3.36638	-6.23647	0.111066	0.639353	0.467724	520.862	126.151	12	3.29041	3	bad
CCTCTGTGTGT	NZ170	1006701	191.206	12	1.46672	0.160843	2.4816	2.48488	7.25751	0.209413	1.02374	1.86489	743.438	381.586	2	1.82507	1	bad
CCTCTGTGTGT	NZ186	1683659	319.783	19	1.3415	0.0950445	2.8692	2.9092	3.03598	0.458359	0.612013	1.57086	769.309	391.919	4	4.48148	1	bad
CCTCTGTGTGT	NZ250	1773484	336.844	288	0.310545	0.111322	1.95414	1.95904	-7.11913	0.678001	0.411147	0.195963	159.868	65.7403	2	1.93561	2	good
CCTGATCCGAT	MS157	1352498	256.885	230	0.320104	0.106488	1.97439	1.96493	-7.42043	0.490074	0.289337	0.0689765	152.733	57.9025	5	1.94454	2	good
CCTGATCCGAT	MS81	3769009	715.861	619	0.32375	0.158472	2.11757	2.11685	-16.6921	0.468011	0.330759	0.0606757	228.903	83.3175	2	2.10161	2	good
CCTGATCCGAT	NZ169	3105003	589.744	442	0.347844	0.225775	3.6568	3.68803	489.117	0.68619	0.426939	1.09776	115.479	23.1061	3	3.86534	3	good
CCTGATCCGAT	NZ170	1623978	308.448	240	0.366165	0.117269	2.20825	2.20284	-27.4913	0.635376	0.413576	0.649682	287.985	98.541	84	2.22982	2	good
CCTGATCCGAT	NZ186	2364383	449.076	394	0.284394	0.0388889	1.9692	1.96791	-7.26088	0.447161	0.225466	0.0602922	9.35558	3.56515	14	1.94663	2	good
CCTGATCCGAT	NZ250	2731343	518.774	404	0.396168	0.119844	4.78806	4.77137	-9.65952	0.663448	0.473585	0.456512	131.78	23.2991	34	4.81481	5	bad
CCTGTCGAGTG	MS157	1648011	313.013	256	0.33672	0.0615594	1.95441	1.95738	-7.46851	0.439	0.271096	0.067668	50.7584	19.9713	24	1.9472	2	good
CCTGTCGAGTG	MS81	1405375	266.928	228	0.320795	0.0736887	1.96538	1.97488	-13.1101	0.345051	0.270125	0.0530709	131.598	51.7499	15	1.9472	2	good
CCTGTCGAGTG	NZ169	207026	39.3212	9	0.99729	0.0911152	2.29189	2.32019	-6.18497	0.124128	0.564033	13.7252	896.225	471.862	23	4.26686	1	bad
CCTGTCGAGTG	NZ170	2052935	389.921	283	0.493306	0.178258	2.54063	2.57291	-6.15865	0.625413	0.694897	0.545363	641.205	201.022	1	2.51301	2	bad
CCTGTCGAGTG	NZ186	175993	33.427	20	0.915553	0.0795167	2.00322	2.01476	22.103	0.0911062	0.468835	0.0862092	682.942	248.554	21	2.06686	2	bad
CCTGTCGAGTG	NZ250	39034	7.41387	4	1.18632	0.12005	1.83962	1.82072	-8.04961	0.144954	1.26421	-0.00802144	1175.59	482.128	9	1.54416	1	bad
CCTGTTAGTAA	MS157	2147409	407.865	13	1.58729	0.186551	5.82146	5.83611	6.54262	0.205448	1.0445	0.273898	370.249	82.8415	2	4.02602	3	bad
CCTGTTAGTAA	MS81	2218784	421.421	348	0.311106	0.193073	2.00975	2.04485	-12.9554	0.526611	0.304227	0.0707757	149.388	55.1186	1	2.02241	2	good
CCTGTTAGTAA	NZ169	3522025	668.951	36	0.991343	0.215199	3.15726	3.05411	12.8464	0.450716	1.63925	1.65069	489.561	348.798	1	1.52365	0	bad
CCTGTTAGTAA	NZ170	848292	161.119	28	1.46319	0.150012	7.63033	7.62188	140.294	0.137165	1.49307	2.0471	249.426	56.7903	50	4.06572	2	bad
CCTGTTAGTAA	NZ186	191634	36.3977	15	1.22555	0.093488	3.27342	3.26934	72.9243	0.115609	0.522544	0.0812787	439.678	109.385	0	3.1943	3	bad
CCTGTTAGTAA	NZ250	4254906	808.149	648	0.434397	0.177196	2.99576	3.0263	-10.2233	0.66974	0.590942	0.0421604	425.027	108.361	2	2.98272	2	bad
CCTTCTCAGCC	MS157	1234605	234.493	205	0.331325	0.133373	1.87596	1.9108	-8.27359	0.508876	0.316728	0.063609	184.834	73.2876	4	1.86515	2	good
CCTTCTCAGCC	MS81	236533	44.9255	22	1.07649	0.139724	2.04137	2.02587	65.8416	0.0784496	0.441837	0.067242	619.417	220.7	19	1.99107	2	bad
CCTTCTCAGCC	NZ169	3546887	673.673	539	0.339155	0.152372	2.20424	2.23162	-22.0082	0.70235	0.406934	0.622331	167.66	57.7595	39	2.27198	2	good
CCTTCTCAGCC	NZ170	837707	159.109	20	1.4925	0.155936	6.63202	6.65155	11.3623	0.172674	1.15516	0.220797	216.318	51.338	4	3.69725	3	bad
CCTTCTCAGCC	NZ186	2647787	502.904	416	0.305262	0.16626	1.59337	1.46514	-4.45972	0.911542	0.434661	0.0954075	261.603	124.081	3	1.38272	1	good
CCTTCTCAGCC	NZ250	3723494	707.216	17	1.18504	0.200001	4.14736	4.03627	-27.7296	0.366179	1.81832	0.096523	161.85	103.592	0	1.38803	0	bad
CCTTGTCTCTG	MS157	1531421	290.868	232	0.357651	0.185412	1.87439	1.89037	-7.48979	0.638845	0.445945	0.0570181	424.945	168.734	22	1.84615	2	good
CCTTGTCTCTG	MS81	5348929	1015.94	813	0.352757	0.0818117	1.97349	1.97772	-12.3331	0.418253	0.300508	0.0530709	236.922	89.8715	0	1.9472	2	good
CCTTGTCTCTG	NZ169	355446	67.5111	9	0.941257	0.0774918	2.71144	2.7305	-7.11382	0.135395	0.564359	45.8732	839.181	440.597	1	5.01766	1	bad
CCTTGTCTCTG	NZ170	1236956	234.939	150	0.848633	0.18632	3.32225	3.30589	-24.6506	0.270685	0.932506	1.07193	539.643	150.319	0	2.88395	2	bad
CCTTGTCTCTG	NZ186	2322627	441.145	360	0.333893	0.0475142	1.9613	1.9624	-8.15624	0.420677	0.258426	0.0603589	72.9451	28.6784	2	1.94891	2	good
CCTTGTCTCTG	NZ250	38704	7.35119	2	1.11079	0.136156	3.05233	3.02562	-69.2314	0.184687	1.64057	-0.0385294	841.72	411.567	22	1.89725	1	bad
CGAACTAGTCA	MS157	1572446	298.66	258	0.330684	0.0955669	1.97441	1.95767	-7.56603	0.438042	0.287613	0.0593761	124.039	48.5943	2	1.93542	2	good
CGAACTAGTCA	MS81	3986978	757.261	616	0.367613	0.112769	1.958	1.95546	-15.0664	0.338163	0.306705	0.0530709	246.078	93.6837	2	1.9472	2	good
CGAACTAGTCA	NZ169	982537	186.617	24	1.06008	0.180184	7.57027	7.62839	-92.2932	0.426671	1.65086	0.316801	191.402	54.5429	16	4.58063	1	bad
CGAACTAGTCA	NZ170	132282	25.1248	11	1.23433	0.181633	5.41277	5.45778	-27.7533	0.0552787	0.571699	0.461676	315.932	50.3937	1	5.35404	5	bad
CGAACTAGTCA	NZ186	2602495	494.301	419	0.319034	0.0684645	1.96908	1.9782	-7.23632	0.446173	0.250047	0.060293	61.7894	24.6619	5	1.9472	2	good
CGAACTAGTCA	NZ250	72519	13.7738	5	1.27841	0.165863	2.21343	2.13641	-3.88591	0.161705	1.10431	0.107783	815.114	357.761	1	1.39278	1	bad
CGAAGCAGGTC	MS157	1024697	194.624	34	1.17066	0.194975	4.29111	4.2631	-5.70374	0.28117	3.16795	0.09829	410.577	212.746	20	1.4416	0	bad
CGAAGCAGGTC	MS81	93438	17.747	11	0.917357	0.150639	2.10701	2.14029	-16.6338	0.0446795	0.690516	0.0543912	931.751	338.888	3	1.97265	2	bad
CGAAGCAGGTC	NZ169	222707	42.2995	6	1.72073	0.0962477	5.47253	5.44864	-10.0867	0.0719723	0.836181	0.598981	333.094	65.4041	56	4.31092	4	bad
CGAAGCAGGTC	NZ170	1236811	234.912	89	0.624023	0.182614	2.77724	2.8402	-9.8758	0.610349	2.03764	0.0955297	707.948	283.153	11	2.1622	0	bad
CGAAGCAGGTC	NZ186	1622343	308.137	280	0.291633	0.0996953	1.90097	1.92022	-10.5916	0.482645	0.29264	0.0618862	194.235	77.0077	11	1.90522	2	good
CGAAGCAGGTC	NZ250	32825	6.23457	2	1.36439	0.187378	5.61318	5.64573	-36.604	0.143764	1.63028	0.0618325	443.371	97.4838	1	4.10826	4	bad
CGACTTCCGTA	MS157	2251251	427.588	363	0.354744	0.06998	1.98009	1.96689	-9.55073	0.384615	0.304419	0.0682289	281.697	107.222	6	1.94093	2	good
CGACTTCCGTA	MS81	220382	41.8579	19	1.15328	0.175053	1.99936	2.04849	18.3282	0.173357	0.479359	0.0685879	706.807	255.328	0	2.08946	2	bad
CGACTTCCGTA	NZ169	71480	13.5764	10	0.673489	0.144803	2.10068	2.11837	-8.77864	0.167066	0.576435	0.162733	840.931	300.807	5	2.11168	2	bad
CGACTTCCGTA	NZ170	2356809	447.637	344	0.383717	0.159253	1.81853	1.83011	-2.85846	0.872622	0.712907	0.199562	367.088	151.174	6	1.48851	2	bad
CGACTTCCGTA	NZ186	2965481	563.244	488	0.292543	0.127213	1.87457	1.89289	-7.52049	0.574631	0.284489	0.0696819	109.843	51.2051	10	1.85375	2	good
CGACTTCCGTA	NZ250	4843404	919.925	708	0.364296	0.126034	4.75981	4.80956	-8.77875	0.768008	0.600558	0.72855	161.94	28.7976	2	4.76961	4	bad
CGAGACACGAA	MS157	593175	112.664	89	0.379325	0.169165	5.94354	5.90703	-14.202	0.452388	0.39381	0.218185	100.654	14.5246	0	5.92517	5	bad
CGAGACACGAA	MS81	148478	28.2009	8	1.47982	0.0844778	2.12458	2.13813	-14.4859	0.0450483	0.621497	0.012133	771.579	278.289	34	2.02013	2	bad
CGAGACACGAA	NZ169	445682	84.65	5	1.7067	0.169	5.43625	5.44899	-22.1525	0.134496	0.871765	0.470583	330.898	69.1907	1	3.8302	4	bad
CGAGACACGAA	NZ170	820792	155.896	119	0.374393	0.074886	2.23013	2.22608	-19.3422	0.634175	0.425249	0.631864	232.463	76.3029	35	2.23723	2	good
CGAGACACGAA	NZ186	1137510	216.051	197	0.280534	0.0499484	1.9609	1.96339	-7.70805	0.426704	0.232683	0.060293	18.5729	7.21008	0	1.9472	2	good
CGAGACACGAA	NZ250	23010	4.37037	2	1.46415	0.149292	5.27815	5.26108	85.5167	0.114354	1.87035	0.241121	420.347	113.895	0	2.82336	1	bad
CGAGTGTTAAT	MS157	1656193	314.567	284	0.313179	0.105271	1.94243	1.95244	-9.88086	0.46105	0.296378	0.0700967	131.485	50.4626	6	1.95347	2	good
CGAGTGTTAAT	MS81	4531621	860.707	619	0.342398	0.224478	2.02205	2.00545	-14.4308	0.71367	0.501108	0.0654153	384.758	132.002	30	1.99202	2	good
CGAGTGTTAAT	NZ169	3931585	746.74	565	0.387932	0.123296	2.17923	2.15646	-16.5137	0.60855	0.425698	0.582971	348.365	119.026	11	2.16752	2	good
CGAGTGTTAAT	NZ170	2077380	394.564	285	0.367723	0.210976	3.09368	3.09883	-3.54929	0.871741	0.833363	1.34313	416.585	112.705	23	2.76372	3	bad
CGAGTGTTAAT	NZ186	178659	33.9333	16	1.12945	0.101521	1.9397	1.94289	-48.4862	0.0930752	0.467602	0.0644779	679.597	248.752	3	1.95594	2	bad
CGAGTGTTAAT	NZ250	3988959	757.637	580	0.400529	0.0692827	1.94787	1.97546	-12.1598	0.597376	0.443388	0.20653	302.984	109.765	11	1.99658	2	good
CGATTGGACCT	MS157	1294327	245.836	211	0.337691	0.115075	1.9604	1.97025	-8.18512	0.445538	0.294393	0.0714218	130.471	50.1516	0	1.94834	2	good
CGATTGGACCT	MS81	203630	38.6762	20	1.04558	0.0999223	1.98753	2.01679	140.112	0.0790667	0.438861	0.012133	696.082	257.146	3	2.02013	2	bad
CGATTGGACCT	NZ169	3204946	608.727	253	0.423331	0.0580074	3.08544	3.09205	-43.0576	0.87252	2.56921	0.177674	434.023	136.098	32	1.76657	0	bad
CGATTGGACCT	NZ170	1539040	292.315	191	0.445279	0.165864	2.33042	2.33422	-7.04007	0.819007	1.04498	0.876832	1053.73	244	37	2.96562	3	bad
CGATTGGACCT	NZ186	1935355	367.589	322	0.297859	0.0371141	1.96285	1.96461	-7.13488	0.451995	0.247489	0.0619845	46.3784	18.0039	13	1.94492	2	good
CGATTGGACCT	NZ250	2113766	401.475	23	1.58526	0.16996	2.50344	2.46885	6.90839	0.177136	1.26917	0.0978468	768.483	382.591	0	1.43229	1	bad
CGCAATGTCAT	MS157	1123625	213.414	188	0.318609	0.0738988	1.9218	1.9132	-7.32058	0.49148	0.299047	0.0554715	109.188	45.2116	12	1.89402	2	good
CGCAATGTCAT	MS81	2536578	481.781	407	0.314025	0.0813979	1.96789	1.96985	-14.8002	0.348812	0.270386	0.0530709	203.374	78.9493	5	1.9472	2	good
CGCAATGTCAT	NZ169	2995355	568.918	505	0.340539	0.0913093	1.98235	1.97672	-16.623	0.248623	0.284498	0	215.462	81.6019	0	2	2	good
CGCAATGTCAT	NZ170	260361	49.4513	8	1.71263	0.114573	2.20101	2.1873	-11.236	0.0663151	0.633449	0.183473	866.481	296.568	69	2.09022	2	bad
CGCAATGTCAT	NZ186	1741428	330.756	275	0.320361	0.221341	3.32301	3.34304	-11.3282	0.687212	0.430291	0.0937868	97.6518	24.6052	1	3.40019	3	good
CGCAATGTCAT	NZ250	31764	6.03305	2	1.37464	0.155616	3.50867	3.58358	-14.6518	0.0452117	1.2245	0.259952	631.804	150.983	6	3.14549	3	bad
CGCACGTTCTG	MS157	548443	104.168	8	1.79741	0.124878	2.52309	2.52272	-8.40764	0.0893644	0.929712	0.067668	689.668	246.501	4	1.9472	2	bad
CGCACGTTCTG	MS81	3912068	743.033	597	0.370375	0.156559	1.99921	2.01618	-15.2739	0.448601	0.362407	0.0673719	383.683	139.503	13	2.00114	2	good
CGCACGTTCTG	NZ169	3262644	619.685	14	0.807455	0.0495638	0.80795	0.819931	15.4064	0.541365	0.488395	0.825652	2389.21	2545.33	42	1.60019	0	bad
CGCACGTTCTG	NZ170	1637123	310.945	76	1.11235	0.195975	4.50416	4.48654	-54.1624	0.461655	2.1507	1.34477	499.21	158.183	54	2.33447	1	bad
CGCACGTTCTG	NZ186	2946820	559.7	490	0.286039	0.0409548	1.97938	1.97048	-6.40353	0.469008	0.220211	0.0645438	35.5697	13.8891	6	1.9396	2	good
CGCACGTTCTG	NZ250	62409	11.8536	6	0.927414	0.140803	2.14071	2.14494	-4.18014	0.16416	0.676952	0.037424	853.656	308.726	0	1.95176	2	bad
CGCGTGACTAC	MS157	2974736	565.002	15	0.838522	0.0680052	1.16183	1.16402	3.20594	0.609488	0.665217	0.0397419	1848.83	1941	0	1.73504	0	bad
CGCGTGACTAC	MS81	240442	45.668	40	0.389878	0.0684907	1.99418	1.98054	-20.273	0.291925	0.354937	0.0660027	393.532	140.776	0	1.98594	2	good
CGCGTGACTAC	NZ169	277066	52.6241	26	1.0086	0.181172	2.37319	2.36731	23.0863	0.262196	0.522891	0.50017	454.903	142.119	1	2.33409	2	good
CGCGTGACTAC	NZ170	2203294	418.479	328	0.370183	0.0845265	2.42696	2.41445	-20.388	0.648852	0.431581	0.748971	216.314	67.4769	13	2.42317	2	good
CGCGTGACTAC	NZ186	2944928	559.341	497	0.325635	0.148658	1.86768	1.88246	-9.80564	0.561644	0.344425	0.0671918	329.084	126.909	14	1.85166	2	good
CGCGTGACTAC	NZ250	3970303	754.094	553	0.440247	0.106832	1.82619	1.8607	-7.02918	0.599286	0.536276	0.1952	563.552	221.882	7	1.87198	2	good
CGCTATTGGCG	MS157	2302531	437.328	10	1.01306	0.161983	6.83458	6.79413	-7.6629	0.414616	2.60263	0.361539	147.465	118.937	5	2.07806	0	bad
CGCTATTGGCG	MS81	4301533	817.005	701	0.304405	0.0619748	1.98863	2.0014	-9.44905	0.51739	0.279953	0.0546461	157.866	60.4043	9	1.96315	2	good
CGCTATTGGCG	NZ169	4404385	836.54	668	0.342493	0.119077	1.69394	1.61199	-3.28413	0.919884	0.585543	0.36916	297.226	136.13	3	1.40969	1	bad
CGCTATTGGCG	NZ170	2247486	426.873	333	0.377243	0.0984968	2.20222	2.20047	-21.5101	0.627103	0.444829	0.593361	227.908	75.4234	2	2.23932	2	good
CGCTATTGGCG	NZ186	2291784	435.287	111	1.14834	0.164934	7.3226	7.33032	42.9414	0.356415	1.93912	0.421138	285.487	87.4902	41	3.96334	1	bad
CGCTATTGGCG	NZ250	23257	4.41728	2	1.47534	0.184207	5.93868	5.97782	-95.309	0.0707418	1.57666	0.271541	370.003	63.5941	0	4.80399	5	bad
CGCTGCCTACA	MS157	160164	30.4205	6	1.49869	0.199666	3.6156	3.63111	-4.47671	0.255492	1.00106	0.0994283	486.794	153.618	4	2.65755	2	bad
CGCTGCCTACA	MS81	3566490	677.396	579	0.416147	0.0921403	1.8932	1.93577	-16.3962	0.258303	0.380319	0.0549451	495.02	190.578	16	1.92802	2	good
CGCTGCCTACA	NZ169	3653654	693.951	590	0.312725	0.102733	2.30641	2.32845	-21.6951	0.701014	0.463039	0.65889	342.003	109.158	0	2.37208	2	good
CGCTGCCTACA	NZ170	1767116	335.635	252	0.389964	0.0891243	2.31655	2.31433	-16.9077	0.660434	0.452859	0.734237	322.597	101.16	1	2.33219	2	good
CGCTGCCTACA	NZ186	2615623	496.794	455	0.307266	0.186323	3.81677	3.80983	-5.99169	0.670431	0.362206	0.194225	142.299	33.0424	2	3.63115	4	bad
CGCTGCCTACA	NZ250	2970912	564.276	414	0.411053	0.186097	1.83654	1.87503	-10.3323	0.625986	0.450622	0.203152	393.18	152.781	16	1.92877	2	good
CGGCGATTGGT	MS157	737171	140.013	103	0.436526	0.0526559	1.91752	1.91341	-9.88835	0.337759	0.36912	0.0677408	377.441	141.219	0	1.94397	2	good
CGGCGATTGGT	MS81	3465814	658.274	564	0.325448	0.0838757	1.9616	1.98858	-14.2435	0.412622	0.290766	0.0652039	223.336	86.7764	0	1.96733	2	good
CGGCGATTGGT	NZ169	258029	49.0084	6	1.74308	0.150205	1.52043	1.42555	-9.42287	0.115058	0.755514	0.226469	1298.92	629.448	1	1.36239	1	bad
CGGCGATTGGT	NZ170	125850	23.9031	5	1.58631	0.137205	7.17196	7.21069	-5.61732	0.142663	0.804422	0.381707	289.946	46.7139	8	5.79563	5	bad
CGGCGATTGGT	NZ186	98856	18.7761	10	1.09586	0.115158	2.08345	2.11111	-8.74855	0.115973	0.545231	0.0937623	748.242	261.889	2	2.07255	2	bad
CGGCGATTGGT	NZ250	16178	3.07274	0	1.87848	1.33227e-15	2	2	1.91857	0.0783513	1.69782e-14	0	0	0	0	2	2	bad
CGGTATCGAAC	MS157	1728196	328.242	272	0.353539	0.0495127	1.95453	1.96014	-9.85458	0.409927	0.286631	0.0714035	126.807	48.0573	1	1.94891	2	good
CGGTATCGAAC	MS81	6133879	1165.03	991	0.303247	0.091904	1.92183	1.93746	-11.4341	0.489165	0.283529	0.0523305	140.762	54.2892	2	1.90693	2	good
CGGTATCGAAC	NZ169	4416838	838.906	21	0.628438	0.0498812	0.740906	0.747986	3.91097	0.724464	0.45025	0.831299	2554.1	2854.53	10	1.60494	0	bad
CGGTATCGAAC	NZ170	1915872	363.888	282	0.397874	0.202893	3.49899	3.52147	-8.19885	0.712053	0.54788	0.935541	199.473	44.2193	9	3.51035	3	bad
CGGTATCGAAC	NZ186	2937420	557.915	459	0.34874	0.123135	1.68772	1.70487	-11.0172	0.575793	0.376055	0.0688939	305.275	128.251	0	1.70275	2	good
CGGTATCGAAC	NZ250	3842978	729.91	579	0.39467	0.203759	4.90036	4.87794	-9.6612	0.703947	0.552029	0.652262	178.861	33.8258	10	4.80684	5	bad
CGGTCTATATT	MS157	1244925	236.453	202	0.332987	0.0429813	1.96809	1.96886	-8.08432	0.418637	0.285746	0.0675563	107.506	41.0921	8	1.94549	2	good
CGGTCTATATT	MS81	3213189	610.292	444	0.675717	0.100864	1.92385	1.95057	-12.7025	0.166026	0.63228	0.0549451	959.954	348.175	6	1.92802	2	bad
CGGTCTATATT	NZ169	2695399	511.947	407	0.364443	0.07004	1.88976	1.914	-10.4155	0.335762	0.284383	-0.00984976	162.958	66.1807	26	1.91206	2	good
CGGTCTATATT	NZ170	1830798	347.73	13	0.480636	0.0587039	1.05464	1.05625	2.89581	0.764014	0.684925	0.314221	2056.76	2159.32	2	1.60076	0	bad
CGGTCTATATT	NZ186	2172121	412.559	351	0.307355	0.0801611	1.9006	1.93808	-8.42826	0.449541	0.254131	0.0644287	31.3524	12.4217	23	1.92802	2	good
CGGTCTATATT	NZ250	2239009	425.263	352	0.31553	0.0842894	1.9268	1.92847	-10.6137	0.650865	0.427172	0.214633	147.526	60.5358	0	1.93827	2	good
CGGTGGTCTGA	MS157	1593615	302.681	264	0.328271	0.0491847	1.94457	1.95293	-8.6374	0.40803	0.289711	0.0700698	137.533	53.1861	7	1.9548	2	good
CGGTGGTCTGA	MS81	2177215	413.526	300	0.326227	0.193219	2.06627	2.10245	-16.2639	0.566997	0.295568	0.0824452	131.035	45.7626	5	2.07673	2	good
CGGTGGTCTGA	NZ169	61141	11.6127	9	0.649908	0.129337	1.9741	2.01522	-5.95142	0.0802867	0.565236	0.144172	853.406	311.561	5	2.03077	2	bad
CGGTGGTCTGA	NZ170	1862496	353.75	276	0.371023	0.10518	2.40581	2.404	-18.7058	0.675663	0.43596	0.731241	243.903	77.7491	1	2.43229	2	good
CGGTGGTCTGA	NZ186	2410677	457.868	400	0.28568	0.0325567	1.96407	1.96715	-7.05448	0.449784	0.227239	0.060293	9.06699	3.5675	6	1.9472	2	good
CGGTGGTCTGA	NZ250	2760005	524.217	426	0.351017	0.175018	4.95411	4.96132	-7.01948	0.76657	0.589939	0.552771	165.929	30.2003	0	4.87673	4	bad
CGGTTAAGGAT	MS157	54381	10.3288	2	1.59401	0.138053	5.518	5.53008	-12.6268	0.02912	1.28867	0.139599	336.713	60.3689	24	4.72953	5	bad
CGGTTAAGGAT	MS81	162491	30.8625	16	1.07217	0.0679452	1.94677	1.96076	-59.5828	0.0647897	0.438467	0.0652039	603.266	227.035	1	1.96733	2	bad
CGGTTAAGGAT	NZ169	2846995	540.74	426	0.315388	0.214317	2.86341	2.8403	-12.3115	0.796546	0.436671	0.786193	106.83	28.8146	13	2.88015	3	good
CGGTTAAGGAT	NZ170	288730	54.8395	9	1.64452	0.153169	2.22869	2.25071	55.3209	0.0556255	0.638461	0.167548	760.375	273.313	1	2.01292	2	bad
CGGTTAAGGAT	NZ186	2126896	403.969	354	0.288827	0.0446518	1.80649	1.81642	-9.0069	0.627619	0.295949	0.0742696	48.2451	20.1501	2	1.81064	2	good
CGGTTAAGGAT	NZ250	27644	5.25052	2	0.965454	0.116321	5.41258	5.46137	-33.4367	0.175825	1.35424	0.292943	412.719	88.7846	4	4.39031	4	bad
CGGTTGGTGTA	MS157	1208801	229.592	209	0.292065	0.0633212	1.95974	1.96449	-7.42273	0.42808	0.250097	0.0675931	45.716	17.4205	0	1.94587	2	good
CGGTTGGTGTA	MS81	368353	69.9626	17	1.42404	0.17204	6.16343	6.1329	10.9486	0.126721	0.530121	0.11811	239.491	35.2588	1	5.9962	6	bad
CGGTTGGTGTA	NZ169	2930252	556.553	30	1.21997	0.228834	3.26203	3.13446	10.9246	0.406069	1.6254	0.58593	439.898	346.901	62	1.5284	0	bad
CGGTTGGTGTA	NZ170	1718078	326.321	47	1.09084	0.216567	3.28086	3.20575	-205.442	0.373694	2.04708	0.878298	569.662	334.131	61	1.4811	0	bad
CGGTTGGTGTA	NZ186	2737687	519.979	449	0.311605	0.200622	3.66158	3.66276	-6.21287	0.811803	0.494511	-0.00580304	109.632	23.1432	1	3.5265	3	bad
CGGTTGGTGTA	NZ250	4286246	814.102	13	1.13276	0.0883964	1.91174	1.86307	4.29021	0.379479	0.961586	1.25652	1219.61	1313.96	1	1.74568	0	bad
CGTACCTCTCG	MS157	2679396	508.907	10	1.27279	0.180832	1.04473	1.05361	6.55959	0.335065	0.674072	0.261699	1928.95	1861.33	15	1.32194	0	bad
CGTACCTCTCG	MS81	5901025	1120.8	918	0.325457	0.148474	5.46777	5.48485	-15.4493	0.542054	0.314547	0.163597	32.0328	4.71491	2	5.46287	5	bad
CGTACCTCTCG	NZ169	3792685	720.358	24	0.688434	0.0411076	1.10404	1.09504	2.93405	0.572596	0.703869	-0.337193	1842.48	2071.61	4	1.55992	0	bad
CGTACCTCTCG	NZ170	2213743	420.464	334	0.359629	0.0766773	2.21463	2.21706	-18.1555	0.639079	0.399349	0.577895	181.243	58.6227	52	2.23495	2	good
CGTACCTCTCG	NZ186	3002347	570.246	489	0.299316	0.13731	3.35583	3.371	-8.42415	0.67088	0.389022	0.159188	37.2266	10.0349	0	3.33466	4	good
CGTACCTCTCG	NZ250	16397	3.11434	2	1.16204	0.128287	3.6582	3.70904	-37.3299	0.0430235	1.47932	0.148697	637.653	155.963	13	3.15935	3	bad
CGTATGACGGA	MS157	547964	104.077	90	0.354058	0.0522188	1.95161	1.9542	-8.60928	0.350435	0.309453	0.067668	227.427	88.2809	0	1.9472	2	good
CGTATGACGGA	MS81	2560250	486.277	291	0.567335	0.202387	3.33518	3.32197	149.11	0.563515	0.821927	0.163369	513.536	140.833	0	3.37398	2	bad
CGTATGACGGA	NZ169	31106	5.90807	5	0.750916	0.213674	5.23443	5.21265	-3.4401	0.0911822	0.749596	0.597266	365.612	65.3785	35	4.72517	5	bad
CGTATGACGGA	NZ170	833409	158.292	127	0.386767	0.123326	2.04672	2.02958	-6.26509	0.733517	0.585209	0.556906	402.841	145.742	0	1.98538	2	good
CGTATGACGGA	NZ186	875543	166.295	9	1.66961	0.1705	2.55171	2.53215	5.68942	0.154971	0.736776	0.0619931	639.614	222.185	27	2.08756	2	bad
CGTATGACGGA	NZ250	3889	0.738651	0	1.79943	0	2	2	2.63785	0.0592816	6.08651e-15	0	0	0	9	2	2	bad
CGTCCTGAGGT	MS157	1565594	297.359	249	0.428235	0.18312	4.42429	4.43091	-3.97723	0.618473	0.543652	0.0211795	198.29	54.6004	6	3.86667	4	bad
CGTCCTGAGGT	MS81	157690	29.9506	14	1.20873	0.131048	2.00925	2.01027	-21.8236	0.0944411	0.533936	0.0653162	818.032	293.239	10	1.95651	2	bad
CGTCCTGAGGT	NZ169	52895	10.0465	7	0.848095	0.149715	2.1049	2.08818	-4.43679	0.111877	0.65171	0.161407	899.195	325.097	15	2.00076	2	bad
CGTCCTGAGGT	NZ170	1658837	315.069	247	0.37519	0.0898903	1.81601	1.80133	-10.6523	0.496288	0.358262	0.0327079	324.003	132.218	0	1.78101	2	good
CGTCCTGAGGT	NZ186	2407193	457.207	364	0.404724	0.187365	5.58415	5.56476	-3.12813	0.714244	0.582472	0.0555827	108.129	31.1969	47	4.84482	4	bad
CGTCCTGAGGT	NZ250	34108	6.47825	4	0.955905	0.127975	6.60914	6.5966	-4.61038	0.0605267	0.895457	0.144577	314.003	49.8321	6	5.48509	6	bad
CGTCGACATTG	MS157	1165536	221.374	190	0.320416	0.113618	1.96419	1.97621	-7.93039	0.444211	0.266859	0.0707897	88.5778	33.6901	12	1.94872	2	good
CGTCGACATTG	MS81	4928228	936.036	825	0.336335	0.141192	5.29253	5.27609	-9.49287	0.586149	0.378133	0.154001	113.788	19.1428	6	5.19734	5	bad
CGTCGACATTG	NZ169	1648356	313.078	21	1.55801	0.185583	3.60027	3.64915	7.25867	0.122217	1.24154	1.5299	345.288	174.047	16	2.07996	1	bad
CGTCGACATTG	NZ170	1869067	354.998	154	0.918521	0.135847	5.54426	5.52636	-18.4516	0.27619	1.34613	0.831976	443.612	95.9545	22	4.27274	3	bad
CGTCGACATTG	NZ186	2418622	459.377	397	0.290916	0.0481073	1.80183	1.8284	-8.41916	0.613603	0.296898	0.0771483	46.1713	19.3365	12	1.8207	2	good
CGTCGACATTG	NZ250	24588	4.67009	0	1.2548	0.126574	8.06907	8.06686	11.7324	0.22589	1.64974	2.70346	96.2527	19.8163	23	4.43343	1	bad
CGTCGCAGTAT	MS157	1666520	316.528	269	0.353666	0.194643	1.94188	1.97026	-8.13732	0.522921	0.343637	0.0801533	248.374	94.9777	0	1.92498	2	good
CGTCGCAGTAT	MS81	4753691	902.885	736	0.359247	0.0853517	1.96332	1.97397	-13.6344	0.306711	0.315425	0.0530709	273.329	102.649	0	1.9472	2	good
CGTCGCAGTAT	NZ169	56818	10.7916	8	0.696153	0.104323	1.88797	1.9074	-5.39949	0.093856	0.556727	0.0676386	971.802	367.257	2	1.92498	2	bad
CGTCGCAGTAT	NZ170	247203	46.9521	8	1.69701	0.201378	3.89516	3.90166	-13.4675	0.0484811	0.612972	0.270292	466.032	100.372	6	3.74891	4	bad
CGTCGCAGTAT	NZ186	2710050	514.729	444	0.308946	0.159585	1.8617	1.84065	-8.42629	0.533227	0.291012	0.0576932	127.519	54.5304	28	1.8359	2	good
CGTCGCAGTAT	NZ250	53182	10.101	4	1.21722	0.130944	2.70871	2.70152	-4.36068	0.0766388	1.04192	0.0379007	609.309	218.509	0	1.95973	2	bad
CGTGAGTAAGG	MS157	1033288	196.256	171	0.334013	0.0584903	1.96317	1.95718	-7.60804	0.402942	0.283257	0.0677718	113.81	44.6828	2	1.94093	2	good
CGTGAGTAAGG	MS81	200860	38.15	13	1.37731	0.0916217	1.99335	2.0083	-95.5414	0.0752738	0.509419	0.0652039	673.676	244.43	0	1.96733	2	bad
CGTGAGTAAGG	NZ169	39483	7.49915	5	0.896588	0.108524	2.17732	2.1759	-3.54556	0.106835	0.733194	0.157233	926.302	327.36	0	2.00494	2	bad
CGTGAGTAAGG	NZ170	1363282	258.933	198	0.372567	0.072697	2.20012	2.20502	-21.1424	0.643471	0.408126	0.641396	257.681	83.0833	33	2.24311	2	good
CGTGAGTAAGG	NZ186	1912492	363.246	318	0.280567	0.0483241	1.98142	1.97848	-6.67843	0.475578	0.222498	0.0603697	17.0707	6.68937	19	1.94606	2	good
CGTGAGTAAGG	NZ250	53848	10.2275	4	1.08511	0.120312	3.74812	3.78139	-6.28925	0.232579	1.29454	0.274166	465.275	137.897	33	2.92099	2	bad
CGTGGTGACTA	MS157	1496562	284.247	234	0.345726	0.179392	4.17802	4.22456	-29.7021	0.56112	0.395501	0.159578	71.4306	13.2424	11	4.32346	4	bad
CGTGGTGACTA	MS81	4775134	906.958	831	0.282599	0.0756684	1.997	2.01267	-9.46937	0.47419	0.261339	0.0652229	130.803	49.7978	2	1.96866	2	good
CGTGGTGACTA	NZ169	3619097	687.388	535	0.358398	0.201237	3.77854	3.766	-17.5496	0.743929	0.507527	1.05066	117.291	25.32	12	3.84691	3	good
CGTGGTGACTA	NZ170	1973436	374.822	268	0.525341	0.105103	2.55801	2.56467	331.703	0.536183	0.592435	0.983893	641.821	204.63	24	2.5491	2	good
CGTGGTGACTA	NZ186	2343925	445.19	378	0.32909	0.165059	1.80516	1.77109	-8.37824	0.539446	0.355633	0.0736958	270.855	112.523	12	1.78101	2	good
CGTGGTGACTA	NZ250	273727	51.9899	4	1.69856	0.130881	6.35777	6.30421	-3.66065	0.0762909	0.7668	0.182061	302.77	50.8149	1	5.1396	5	bad
CGTTCTAGCGG	MS157	70886	13.4636	6	1.0793	0.174657	4.09419	4.11978	-4.75334	0.163605	0.767462	0.0551396	470.163	108.131	1	3.52042	4	bad
CGTTCTAGCGG	MS81	3490608	662.983	563	0.332791	0.136123	1.88474	1.93174	-16.8177	0.37536	0.302308	0.0527197	264.116	103.572	13	1.93124	2	good
CGTTCTAGCGG	NZ169	67096	12.7438	10	0.618785	0.100198	2.02041	2.04601	-5.96529	0.0824334	0.505742	0.0962261	840.85	298.704	0	2.06021	2	bad
CGTTCTAGCGG	NZ170	448738	85.2304	10	1.77595	0.100065	2.14025	2.14773	1406.74	0.0277464	0.557011	0.101568	682.651	240.525	27	2.06876	2	bad
CGTTCTAGCGG	NZ186	3070038	583.103	456	0.367159	0.0625869	1.95504	1.95503	-8.80075	0.386075	0.287382	0.060293	147.641	57.4585	16	1.9472	2	good
CGTTCTAGCGG	NZ250	185652	35.2615	8	1.54758	0.192695	2.25338	2.30523	-9.33824	0.136679	0.709331	0.315412	954.062	347.634	0	2.30332	2	bad
CTACGTACAGA	MS157	2354711	447.239	13	1.34768	0.213091	5.74279	5.79002	-11.3133	0.262075	1.93999	0.208241	138.408	72.557	13	1.99335	1	bad
CTACGTACAGA	MS81	4549413	864.086	726	0.305466	0.0929916	1.96662	1.98438	-12.7584	0.468099	0.270111	0.0547886	129.266	49.0375	10	1.95916	2	good
CTACGTACAGA	NZ169	82085	15.5907	10	0.94206	0.188505	2.1413	2.17469	-9.20906	0.095805	0.624755	0.136456	801.781	279.69	59	2.07635	2	bad
CTACGTACAGA	NZ170	384099	72.9533	9	1.63685	0.167044	4.69131	4.72054	17.6962	0.184551	0.82252	0.110506	393.917	99.3263	10	3.94036	3	bad
CTACGTACAGA	NZ186	2567412	487.638	422	0.286705	0.0805656	1.66237	1.64366	-6.86444	0.831475	0.381095	0.0718862	136.903	63.252	24	1.62488	2	good
CTACGTACAGA	NZ250	59282	11.2596	7	0.830319	0.209186	4.58293	4.55366	-4.09893	0.230005	0.864736	0.609001	428.655	97.5699	0	4.08034	4	bad
CTAGAAGCCAT	MS157	1688739	320.748	281	0.311711	0.0502678	1.9686	1.96482	-6.51291	0.469411	0.25865	0.067668	52.874	20.7437	3	1.9472	2	good
CTAGAAGCCAT	MS81	5639103	1071.05	868	0.322312	0.165857	2.09384	2.1139	-15.2754	0.548581	0.318553	0.076391	132.907	46.1683	17	2.10028	2	good
CTAGAAGCCAT	NZ169	4004309	760.553	614	0.363487	0.0512615	1.9888	1.98734	-13.8162	0.225456	0.270812	0.00614215	139.285	53.1951	7	2.00342	2	good
CTAGAAGCCAT	NZ170	1694224	321.79	243	0.379388	0.156169	5.05206	5.07469	-12.8077	0.683003	0.486681	1.39984	121.165	20.3712	11	5.17322	5	bad
CTAGAAGCCAT	NZ186	2859827	543.177	437	0.360381	0.0754559	1.95526	1.9606	-10.5768	0.367184	0.296397	0.0603582	176.734	68.9241	26	1.94834	2	good
CTAGAAGCCAT	NZ250	32862	6.2416	3	1.19698	0.164947	2.0767	2.09585	-6.70753	0.0593218	1.00191	0.0740429	929.379	325.98	11	1.94093	2	bad
CTATTACAACC	MS157	1799412	341.769	287	0.356971	0.0469273	1.91935	1.93287	-7.68694	0.474497	0.321498	0.0874044	210.013	80.897	0	1.90237	2	good
CTATTACAACC	MS81	220160	41.8158	21	1.09775	0.156403	3.42983	3.44502	29.0484	0.168944	0.502896	0.0810484	317.289	73.5986	21	3.29991	3	bad
CTATTACAACC	NZ169	5731799	1088.66	755	0.431988	0.0937107	2.87626	2.90166	-12.3581	0.899486	1.26915	0.608154	737.225	125.805	7	3.76068	0	bad
CTATTACAACC	NZ170	2425295	460.645	380	0.332477	0.181558	2.59814	2.58264	-25.0114	0.690756	0.502404	0.928699	333.096	96.9999	45	2.62678	2	good
CTATTACAACC	NZ186	4148297	787.901	31	1.51057	0.0924452	1.86715	1.90374	2.36417	0.273494	0.521312	0.968058	1178.38	640.966	7	3.31225	1	bad
CTATTACAACC	NZ250	887228	168.514	8	1.74077	0.169768	2.23384	2.25558	-10.3877	0.156564	1.0931	0.709523	923.809	512.327	17	1.77854	1	bad
CTCACTAGAGC	MS157	1081957	205.5	89	0.890862	0.140712	7.10245	7.14448	-7.58566	0.413699	2.17075	0.318848	293.478	74.1556	25	3.91795	1	bad
CTCACTAGAGC	MS81	200158	38.0167	14	1.1841	0.104531	2.20448	2.22607	19.1719	0.247401	0.544008	0.181255	823.391	294.195	7	2.53257	2	bad
CTCACTAGAGC	NZ169	322062	61.1704	14	1.46783	0.221745	5.29104	5.28203	7.12606	0.146298	0.634165	0.749578	289.333	52.8007	18	4.70902	5	bad
CTCACTAGAGC	NZ170	750047	142.459	10	1.13844	0.201762	1.33757	1.29671	7.85306	0.303893	0.86246	-0.351883	1484.09	1413.49	17	1.31301	0	bad
CTCACTAGAGC	NZ186	1742642	330.986	195	0.725603	0.107537	2.05861	2.09085	5.82574	0.258281	0.435958	0.0623262	506.636	180.455	1	2.01975	2	bad
CTCACTAGAGC	NZ250	78831	14.9726	10	0.909693	0.111027	2.00124	1.99848	-6.06011	0.0984308	0.569464	0	860.484	306.868	21	2	2	bad
CTCATCGATAA	MS157	1974990	375.117	296	0.38178	0.114476	3.54292	3.54218	-7.23852	0.587025	0.375585	0.138888	67.2969	15.6854	4	3.48718	4	bad
CTCATCGATAA	MS81	6732125	1278.66	907	0.387791	0.167713	4.72853	4.74374	-2.44651	0.905349	0.724556	0.113947	153.058	34.8238	0	3.72213	0	bad
CTCATCGATAA	NZ169	71104	13.505	10	0.633832	0.187923	3.50999	3.4916	-6.59737	0.120057	0.518214	0.275254	438.157	101.325	9	3.49877	3	bad
CTCATCGATAA	NZ170	2191565	416.252	312	0.424313	0.125089	1.59782	1.53537	-4.85084	0.687936	0.496689	-0.0964535	583.509	281.191	0	1.42222	2	bad
CTCATCGATAA	NZ186	3051230	579.531	482	0.348621	0.181269	4.29991	4.30363	-10.254	0.54251	0.374786	0.0520677	53.9329	12.622	0	4.39012	5	bad
CTCATCGATAA	NZ250	42185	8.01235	4	1.0161	0.0678906	7.88012	7.88298	-4.11111	0.186454	1.22874	0.382635	257.594	40.53	0	5.98974	6	bad
CTCGGTCGTCA	MS157	57163	10.8572	4	1.27499	0.138759	2.26144	2.23343	-3.1892	0.096691	0.775181	0.0746168	891.065	307.177	4	1.98519	2	bad
CTCGGTCGTCA	MS81	4992702	948.281	712	0.399867	0.10177	1.97415	1.98544	-12.625	0.415827	0.350623	0.0537149	361.203	137.297	41	1.95897	2	good
CTCGGTCGTCA	NZ169	4738687	900.036	183	0.885286	0.229486	5.71515	5.64077	-683.4	0.522919	2.36437	0.559549	337.725	95.9965	1	2.94169	0	bad
CTCGGTCGTCA	NZ170	1910297	362.829	272	0.374551	0.105644	2.29004	2.32623	-20.7179	0.684142	0.459866	0.712649	305.005	100.154	16	2.37132	2	good
CTCGGTCGTCA	NZ186	2440391	463.512	385	0.347235	0.0978658	1.96081	1.95674	-10.0624	0.390926	0.28157	0.0603729	136.003	52.5772	2	1.94511	2	good
CTCGGTCGTCA	NZ250	14836	2.81785	2	1.00121	0.0958147	5.7212	5.73626	-51.9901	0.150485	1.45551	0.485686	398.43	76.0464	9	4.23324	2	bad
CTCTAATACCT	MS157	2104493	399.714	336	0.332189	0.127138	1.85595	1.87717	-5.50566	0.709437	0.34056	0.0671362	176.8	75.0499	13	1.80247	2	good
CTCTAATACCT	MS81	7154835	1358.94	1113	0.330891	0.149582	1.97483	2.01873	-15.651	0.465458	0.303166	0.0657268	264.957	100.973	1	1.98272	2	good
CTCTAATACCT	NZ169	5655871	1074.24	828	0.366953	0.180351	2.08975	2.1222	-17.5867	0.689999	0.452559	0.585598	331.25	117.255	5	2.17398	2	good
CTCTAATACCT	NZ170	343282	65.2008	15	1.57436	0.0893143	2.0068	2.03951	152.304	0.0432021	0.456251	0.0667211	650.074	240.796	0	2.02013	2	bad
CTCTAATACCT	NZ186	3415192	648.659	575	0.281008	0.0596081	1.97128	1.97865	-6.99318	0.451238	0.221976	0.0602922	21.9598	8.30018	2	1.94663	2	good
CTCTAATACCT	NZ250	59020	11.2099	3	1.22531	0.120748	2.12526	2.11229	-10.3794	0.201249	1.27972	0.188731	1045.49	584.914	4	1.58101	1	bad
CTCTAGATTGT	MS157	597961	113.573	99	0.332289	0.0466249	1.95275	1.95554	-8.62006	0.365557	0.290293	0.0707897	112.39	43.1046	35	1.94872	2	good
CTCTAGATTGT	MS81	3284016	623.745	484	0.488277	0.171708	5.78908	5.78733	-6.71778	0.668268	0.573223	0.255107	236.434	34.8588	0	5.53276	7	bad
CTCTAGATTGT	NZ169	53464	10.1546	8	0.642227	0.113993	2.01043	2.00657	-5.11987	0.106579	0.615303	0.21765	1004.46	363.524	15	2.00494	2	bad
CTCTAGATTGT	NZ170	959521	182.245	134	0.399433	0.160505	1.61364	1.49878	-4.55824	0.772905	0.559107	0.304606	623.823	289.483	11	1.38955	1	bad
CTCTAGATTGT	NZ186	1424555	270.571	210	0.366067	0.0616653	1.95189	1.95857	-9.19132	0.358004	0.285573	0.060293	121.314	47.5918	4	1.9472	2	good
CTCTAGATTGT	NZ250	6126	1.16353	0	1.3428	0.0740212	5.50407	5.4993	12.4149	0.0112372	0.689306	0.141587	187.868	37.6192	8	4.08528	4	bad
CTCTATAGCTA	MS157	1385899	263.229	225	0.322643	0.0817462	1.96698	1.95978	-7.30278	0.454293	0.264893	0.0717104	46.3963	17.977	24	1.9396	2	good
CTCTATAGCTA	MS81	3950459	750.325	655	0.318419	0.17098	1.92879	1.95926	-9.22154	0.505973	0.301756	0.0530401	204.744	80.8415	1	1.91909	2	good
CTCTATAGCTA	NZ169	97637	18.5445	15	0.51545	0.136611	5.73772	5.76864	-8.50461	0.193085	0.479233	1.0033	209.342	30.9969	10	5.80817	5	bad
CTCTATAGCTA	NZ170	2051715	389.689	328	0.352239	0.159947	1.90415	1.92863	-4.73149	0.799289	0.473811	0.0957058	279.035	105.795	6	1.79905	2	good
CTCTATAGCTA	NZ186	2838051	539.041	427	0.349337	0.0504468	1.96591	1.97297	-7.70178	0.439292	0.266194	0.060293	36.4246	14.0629	3	1.9472	2	good
CTCTATAGCTA	NZ250	38606	7.33257	2	1.11822	0.129824	2.65534	2.65158	-137.733	0.254028	1.75137	0.224761	985.53	510.144	4	1.68642	1	bad
CTGAAGGAACA	MS157	465339	88.3835	78	0.339071	0.0475737	1.97778	1.97849	-8.27512	0.325516	0.280244	0.067668	142.59	55.0618	14	1.9472	2	good
CTGAAGGAACA	MS81	144875	27.5166	11	1.28021	0.111016	2.07113	2.07842	-31.0201	0.0743575	0.565842	0.0525647	776.755	285.973	2	1.96752	2	bad
CTGAAGGAACA	NZ169	51103	9.70617	8	0.655519	0.145784	2.05447	2.07094	-5.03948	0.0923754	0.58115	0.0867506	811.131	286.249	6	2.00532	2	bad
CTGAAGGAACA	NZ170	982300	186.572	142	0.38508	0.195582	3.56339	3.54633	-15.0578	0.63543	0.487007	0.778158	126.053	31.3758	32	3.6397	3	bad
CTGAAGGAACA	NZ186	959922	182.321	14	1.28415	0.0564361	2.83152	2.87918	8.71429	0.312917	0.524456	3.1821	762.381	405.943	35	5.30408	1	bad
CTGAAGGAACA	NZ250	19677	3.73732	2	0.890939	0.182901	2.03792	2.03051	-9.25239	0.0940754	1.07164	0.0561353	1025.73	338.914	1	2.19468	2	bad
CTGAGTGATGT	MS157	1629642	309.524	246	0.371783	0.108779	2.57138	2.5624	-7.21586	0.643819	0.440663	0.0209839	171.436	49.3643	0	2.58557	2	good
CTGAGTGATGT	MS81	106617	20.2501	13	0.814063	0.0749325	2.03667	2.06805	-23.1464	0.152901	0.498393	0.0726795	782.397	280.538	0	2.12858	2	bad
CTGAGTGATGT	NZ169	429922	81.6566	8	1.78785	0.173191	2.36191	2.44146	-186.774	0.121104	0.714141	0.241566	741.077	268.741	2	2.06667	2	bad
CTGAGTGATGT	NZ170	1804281	342.693	268	0.347834	0.181651	3.27307	3.29762	-13.8677	0.748472	0.482619	0.88814	166.77	44.869	0	3.34245	3	bad
CTGAGTGATGT	NZ186	2837427	538.923	423	0.340231	0.111976	1.59254	1.57793	-9.07255	0.719124	0.449645	0.0497092	339.918	152.455	3	1.58272	2	good
CTGAGTGATGT	NZ250	4035080	766.397	593	0.378468	0.0775046	1.97846	2.01347	-12.2041	0.666684	0.413335	0.208186	234.941	86.5205	0	2.01197	2	good
CTGATAAGCGA	MS157	251114	47.695	2	1.67647	0.144556	4.12001	4.12057	-19.6029	0.106854	1.58536	1.54205	519.979	234.3	3	2.5548	1	bad
CTGATAAGCGA	MS81	1221986	232.096	151	0.373927	0.160194	2.26721	2.26499	-29.4462	0.513666	0.4299	0.0828037	466.935	155.166	0	2.24748	2	bad
CTGATAAGCGA	NZ169	2149801	408.319	327	0.368895	0.0416045	1.96714	1.97828	-14.2545	0.239384	0.278045	0.00186579	169.503	65.6784	2	2.00741	2	good
CTGATAAGCGA	NZ170	1060893	201.499	153	0.381425	0.0781531	2.37483	2.36205	-15.6454	0.642494	0.432556	0.668764	243.473	76.5058	2	2.38898	2	good
CTGATAAGCGA	NZ186	1977351	375.565	266	0.512081	0.0470161	1.8454	1.85266	-11.4787	0.310233	0.474299	0.0688331	689.225	258.3	9	1.86325	2	good
CTGATAAGCGA	NZ250	28857	5.48091	2	1.52421	0.176367	5.57062	5.52011	-238.639	0.148217	1.92403	0.159003	413.965	98.6534	0	3.37417	4	bad
CTGCCATAGCA	MS157	1902814	361.408	9	0.731176	0.0464462	0.949202	0.959304	-89.2823	0.408086	0.596675	0.205211	2086.65	2261.33	4	1.55385	0	bad
CTGCCATAGCA	MS81	4770998	906.172	741	0.337995	0.191133	5.19485	5.1725	-8.43459	0.758462	0.473754	0.149223	128.114	20.2094	5	5.09022	6	bad
CTGCCATAGCA	NZ169	127314	24.1812	11	1.09367	0.155962	5.93193	5.93547	-8.82814	0.122284	0.529472	0.885907	302.832	44.6203	0	5.95024	6	bad
CTGCCATAGCA	NZ170	1624041	308.46	238	0.383317	0.0877793	2.19974	2.19766	-17.8086	0.629689	0.44675	0.658529	285.646	89.753	2	2.24008	2	good
CTGCCATAGCA	NZ186	210079	39.901	17	1.00089	0.117274	2.0213	1.99199	-32.2173	0.185424	0.446487	0.0859916	586.694	210.831	18	2.02982	2	bad
CTGCCATAGCA	NZ250	39555	7.51282	3	1.14463	0.130796	2.35162	2.38154	-8.89465	0.113563	1.06379	0.0696647	909.852	333.363	0	1.89497	2	bad
CTGCCTAATTC	MS157	55993	10.6349	8	0.672263	0.165468	2.18011	2.21459	-5.52558	0.147032	0.651876	0.0903711	892.791	309.093	10	2.09269	2	bad
CTGCCTAATTC	MS81	227174	43.148	24	0.988643	0.0807987	1.99335	1.98701	-211.992	0.0891651	0.513404	0.0530709	830.272	305.222	14	1.9472	2	bad
CTGCCTAATTC	NZ169	111906	21.2547	17	0.49899	0.0730648	1.962	1.9847	-8.82663	0.0919837	0.443256	0.0731815	671.82	250.95	3	2.02013	2	good
CTGCCTAATTC	NZ170	239527	45.4942	6	1.452	0.0713988	2.45322	2.44265	-11.8203	0.297234	0.930522	0.323123	878.557	408.987	1	2.60912	1	bad
CTGCCTAATTC	NZ186	256930	48.7996	27	0.994831	0.0407662	1.97716	1.97317	-1044.58	0.121378	0.431871	0.060293	744.885	274.744	5	1.9472	2	bad
CTGCCTAATTC	NZ250	106004	20.1337	14	0.733916	0.133767	3.91649	3.86927	-8.53179	0.264094	0.557971	0.439494	343.53	78.2986	7	3.90674	4	bad
CTGCTCCGTTA	MS157	1027274	195.114	171	0.334172	0.0873045	1.94983	1.95402	-8.12366	0.392793	0.28296	0.067668	135.538	52.5658	4	1.9472	2	good
CTGCTCCGTTA	MS81	161651	30.7029	15	1.1422	0.0850108	1.97223	1.99261	-38.9378	0.0595936	0.463274	0.0631909	713.518	264.186	1	1.96334	2	bad
CTGCTCCGTTA	NZ169	475571	90.3269	9	1.6394	0.0829932	2.70674	2.73731	8.02952	0.150128	0.683495	0.232497	649.788	221.043	0	2.51472	2	bad
CTGCTCCGTTA	NZ170	1302950	247.474	177	0.408035	0.142892	3.60782	3.61844	-3.66335	0.79842	0.869266	0.49639	285.551	72.1717	0	3.16467	2	bad
CTGCTCCGTTA	NZ186	1786578	339.331	303	0.279566	0.0504185	1.80386	1.82861	-8.37196	0.608431	0.291126	0.0772287	29.5516	11.8046	34	1.82013	2	good
CTGCTCCGTTA	NZ250	2329134	442.381	394	0.309944	0.0505069	1.981	1.98704	-11.3379	0.241883	0.239409	0	76.0699	29.1001	0	2	2	good
CTGCTGTCTAG	MS157	804972	152.891	46	0.840371	0.205427	11.6318	11.625	-5.05859	0.409203	2.7495	0.398511	172.201	50.2616	34	5.10712	0	bad
CTGCTGTCTAG	MS81	90966	17.2775	8	1.27669	0.149599	5.54432	5.50126	-7.932	0.101312	0.671084	0.13694	356.816	61.4068	11	5.12555	5	bad
CTGCTGTCTAG	NZ169	439863	83.5447	5	1.79404	0.137309	5.45304	5.46407	-15.3102	0.0847992	0.993194	0.28902	324.558	75.7508	53	3.5886	4	bad
CTGCTGTCTAG	NZ170	258837	49.1618	4	1.65015	0.143117	7.50842	7.49369	-5.96399	0.141894	0.970568	0.464441	276.866	52.76	0	5.01026	4	bad
CTGCTGTCTAG	NZ186	716601	136.107	10	1.63097	0.128264	3.99901	4.0309	5.14536	0.149446	0.761557	0.0906928	413.331	102.815	28	3.32877	3	bad
CTGCTGTCTAG	NZ250	18536	3.52061	0	1.57375	0.0948178	2.69845	2.67903	11.45	0.18243	1.40941	0.0843562	326.855	129.628	50	1.44691	1	bad
CTGTAAGAGAC	MS157	1656923	314.705	15	1.27735	0.21793	4.00894	4.07489	8.8985	0.393433	0.782638	2.92927	488.318	246.027	2	5.07844	1	bad
CTGTAAGAGAC	MS81	2816673	534.981	404	0.353902	0.101791	1.95293	1.9537	-16.9699	0.344708	0.271372	0.0531603	163.016	62.5225	5	1.94929	2	good
CTGTAAGAGAC	NZ169	231939	44.053	31	0.619016	0.144742	3.31752	3.31427	19.6198	0.21302	0.491625	0.574503	410.694	100.782	15	3.29478	3	bad
CTGTAAGAGAC	NZ170	2041887	387.823	286	0.401111	0.159434	1.93288	1.91481	-16.7211	0.676528	0.563349	0.629172	544.863	206.161	2	1.96353	2	good
CTGTAAGAGAC	NZ186	2768502	525.831	406	0.345416	0.0665438	1.80481	1.8193	-9.85865	0.576275	0.330379	0.0777983	104.067	43.1	2	1.81481	2	good
CTGTAAGAGAC	NZ250	3469259	658.929	472	0.413871	0.100897	2.0108	2.02266	-18.1316	0.530129	0.354997	0.194587	244.057	93.4211	59	2.05736	2	good
CTTAAGCATAG	MS157	705040	133.911	116	0.332568	0.0546309	1.96183	1.95147	-8.36935	0.406133	0.293373	0.0725883	131.026	51.4284	0	1.94359	2	good
CTTAAGCATAG	MS81	2264622	430.128	345	0.390039	0.184022	4.76908	4.77868	-15.4367	0.442514	0.365455	0.129323	149.388	26.0685	3	4.70712	5	bad
CTTAAGCATAG	NZ169	27427	5.20931	4	0.772305	0.153519	6.25536	6.28839	-3.51263	0.0765619	0.743362	0.497086	263.35	40.753	2	5.77208	6	bad
CTTAAGCATAG	NZ170	832868	158.19	124	0.366045	0.0813273	2.19899	2.20399	-16.8063	0.634134	0.421542	0.652668	231.408	78.2026	19	2.2302	2	good
CTTAAGCATAG	NZ186	78653	14.9388	8	1.11743	0.119663	1.97708	1.98096	-7.07709	0.0732325	0.575605	0.0653403	872.606	320.783	3	1.96733	2	bad
CTTAAGCATAG	NZ250	1599782	303.852	263	0.342405	0.0685016	1.96015	1.96922	-11.1862	0.2075	0.257585	0	121.576	47.5829	0	2	2	good
CTTAGATCGAC	MS157	403289	76.5981	58	0.450134	0.0433317	1.91756	1.9272	-9.71568	0.287644	0.398506	0.067668	496.4	187.609	3	1.9472	2	good
CTTAGATCGAC	MS81	156705	29.7635	9	1.51187	0.0513266	1.99159	2.01347	-10.2783	0.0618179	0.581299	0.0652039	811.691	298.119	6	1.96733	2	bad
CTTAGATCGAC	NZ169	51701	9.81975	8	0.63728	0.153113	3.29158	3.32401	-4.82669	0.137808	0.634111	0.613668	538.061	138.242	2	3.27483	3	bad
CTTAGATCGAC	NZ170	853607	162.129	124	0.364851	0.0749937	2.4246	2.43142	-13.6416	0.689262	0.445077	0.683005	174.752	54.7074	2	2.44786	2	good
CTTAGATCGAC	NZ186	104151	19.7818	13	0.816641	0.0775698	1.92795	1.93721	-8.81714	0.134592	0.483324	0.060293	771.002	288.009	2	1.9472	2	bad
CTTAGATCGAC	NZ250	12515	2.37702	0	1.49325	0.0527665	4.41171	4.40207	12.3804	0.0924206	1.07977	-0.0143987	223.461	64.4486	0	2.52099	2	bad
CTTAGGCTCCT	MS157	1674864	318.113	5	1.28033	0.120702	5.01143	4.96255	-7.34823	0.345094	1.97841	0.218495	307.27	310.092	11	1.85432	0	bad
CTTAGGCTCCT	MS81	155696	29.5719	12	1.2273	0.190265	4.38234	4.38023	-23.4872	0.118104	0.577481	0.113901	382.984	77.9807	0	4.14245	4	bad
CTTAGGCTCCT	NZ169	2492757	473.458	369	0.386521	0.166533	6.19664	6.23221	-3.19226	0.820605	0.599709	1.10179	55.5392	10.1522	1	5.36144	4	bad
CTTAGGCTCCT	NZ170	1480408	281.179	173	0.411189	0.135913	2.22971	2.24913	-6.68162	0.822896	1.11602	1.17754	1089.91	223.091	0	3.24255	0	bad
CTTAGGCTCCT	NZ186	1982081	376.464	328	0.292406	0.0920733	1.92191	1.92742	-7.81391	0.512523	0.25553	0.0643826	39.5068	16.4009	10	1.90959	2	good
CTTAGGCTCCT	NZ250	21903	4.16011	2	1.13875	0.169592	4.37804	4.38542	585.985	0.137615	1.5293	-0.00360749	503.767	137.622	0	3.41709	3	bad
CTTGCTATGCT	MS157	1837984	349.095	156	0.916183	0.168438	3.05742	3.06343	-8.28965	0.394715	2.04547	0.155441	700.168	237.297	3	1.74321	3	bad
CTTGCTATGCT	MS81	186106	35.3478	21	0.892454	0.0897609	1.96213	1.99759	-57.2904	0.158021	0.444124	0.0549934	586.388	213.871	28	2.01728	2	bad
CTTGCTATGCT	NZ169	59623	11.3244	8	0.646294	0.15156	2.05268	2.05698	-5.72336	0.121014	0.582386	0.0695172	890.36	321.323	19	2.05223	2	bad
CTTGCTATGCT	NZ170	329846	62.6488	10	1.62127	0.167782	2.45515	2.52904	78.9112	0.104361	0.744063	0.271504	671.737	236.233	69	2.14568	2	bad
CTTGCTATGCT	NZ186	161547	30.6832	16	1.04182	0.142946	1.99155	1.9982	-34.7829	0.154498	0.50161	0.061215	818.66	299.95	3	2.14777	2	bad
CTTGCTATGCT	NZ250	3829779	727.403	568	0.382589	0.171007	1.8387	1.85761	-6.89489	0.735537	0.494384	0.150463	334.412	128.262	22	1.82032	2	good
CTTGGCGCATT	MS157	2609597	495.65	438	0.330535	0.192668	3.00953	3.0344	-12.2056	0.526817	0.381296	0.12387	148.09	37.6573	5	3.0566	3	good
CTTGGCGCATT	MS81	418495	79.4862	30	1.30187	0.0923109	2.95749	2.97311	13.3938	0.0343263	0.369437	0.0652039	203.409	55.8381	2	2.96733	3	bad
CTTGGCGCATT	NZ169	141702	26.914	17	0.883149	0.0923475	1.98761	2.02018	-26.5597	0.0864869	0.437916	0.138062	576.052	214.987	26	2.02849	2	good
CTTGGCGCATT	NZ170	4411325	837.858	716	0.36863	0.10842	2.83431	2.81048	-10.6721	0.425136	0.344717	0.0583386	167.311	48.9997	2	2.83799	3	bad
CTTGGCGCATT	NZ186	211543	40.1791	34	0.474665	0.0535305	1.92915	1.92169	-16.4643	0.164108	0.349628	0.0600098	329.744	126.354	0	1.94625	2	bad
CTTGGCGCATT	NZ250	89001	16.9043	8	1.09846	0.164264	4.85494	4.8447	-9.10217	0.187591	0.679641	0.114094	372.14	72.752	5	4.47901	4	bad
GAACATGAGGC	MS157	463844	88.0995	66	0.439378	0.0584291	1.93757	1.92499	-10.2932	0.304567	0.390466	0.0754459	481.58	183.202	50	1.94131	2	good
GAACATGAGGC	MS81	118282	22.4657	9	1.3117	0.167576	2.1693	2.15247	-7.51457	0.0758804	0.575344	0.0735088	784.742	270.076	8	2.08319	2	bad
GAACATGAGGC	NZ169	2170353	412.223	323	0.345145	0.0998005	2.18086	2.18479	-12.2342	0.699301	0.428401	0.58014	243.491	81.8614	35	2.18955	2	good
GAACATGAGGC	NZ170	155117	29.4619	8	1.49199	0.133562	5.13529	5.17785	-14.1184	0.11708	0.69017	0.410817	305.412	55.1579	2	4.61709	5	bad
GAACATGAGGC	NZ186	646152	122.726	26	1.34024	0.151168	2.78642	2.8351	13.9627	0.172628	1.19324	0.0609593	469.417	204.305	6	1.64387	1	bad
GAACATGAGGC	NZ250	19932	3.78575	2	1.10054	0.146342	2.01189	1.98662	-29.9963	0.0613221	1.39478	0.0484437	1120.49	423.39	0	1.74169	2	bad
GAACCTTCATA	MS157	908330	172.522	150	0.3162	0.0683393	1.96311	1.95748	-7.53559	0.426069	0.265297	0.0754459	32.7234	12.6995	2	1.94131	2	good
GAACCTTCATA	MS81	442983	84.1373	71	0.340747	0.162982	2.5387	2.59772	-14.3781	0.620968	0.459881	0.0955357	254.919	76.1428	0	2.58727	2	good
GAACCTTCATA	NZ169	2412253	458.168	381	0.329789	0.139212	2.16767	2.19844	-15.7981	0.69342	0.440215	0.553164	305.504	104.484	3	2.21159	2	good
GAACCTTCATA	NZ170	247470	47.0028	6	1.77927	0.138631	2.1418	2.14728	-6.21523	0.0835506	0.736479	0.21217	977.562	357.801	12	1.93276	2	bad
GAACCTTCATA	NZ186	1700834	323.045	22	1.43164	0.157535	5.1473	5.14156	4.09913	0.31468	0.96292	-0.136862	191.078	83.2301	3	3.43495	1	bad
GAACCTTCATA	NZ250	15748	2.99107	2	1.39942	0.142822	3.63645	3.65856	3833.74	0.0125102	1.58149	0.150674	638.607	170.34	9	2.53903	3	bad
GAACGAAGCGG	MS157	1189685	225.961	195	0.328002	0.0416766	1.952	1.95086	-8.43034	0.402426	0.277532	0.0739214	108.444	41.7846	13	1.94321	2	good
GAACGAAGCGG	MS81	158578	30.1193	14	1.19261	0.121357	3.11513	3.1401	54.3614	0.0904162	0.555519	0.0690742	393.404	103.397	7	3.00969	3	bad
GAACGAAGCGG	NZ169	196506	37.3231	8	1.19893	0.0683037	2.58104	2.58867	-8.18456	0.132913	0.672259	15.5375	823.452	436.615	9	3.8509	1	bad
GAACGAAGCGG	NZ170	1804326	342.702	270	0.376108	0.238533	2.48632	2.49363	-15.689	0.549227	0.39094	0.19344	221.455	70.6862	19	2.47901	2	bad
GAACGAAGCGG	NZ186	2389963	453.934	375	0.328962	0.136489	2.78917	2.77835	-10.5628	0.449363	0.2771	0.112969	35.694	10.8545	28	2.78708	3	good
GAACGAAGCGG	NZ250	13884	2.63704	2	1.27831	0.192373	3.00851	2.94366	-968.292	0.0525149	1.50266	0.145595	689.741	211.092	10	2.25318	2	bad
GAACTCTTCTG	MS157	1058131	200.975	171	0.37039	0.0442171	1.97563	1.96147	-9.30159	0.397519	0.314659	0.0695171	261.03	101.228	2	1.95271	2	good
GAACTCTTCTG	MS81	769835	146.217	119	0.397585	0.0865773	1.94659	1.93845	-22.2856	0.209467	0.336729	0.0530709	396.606	151.909	2	1.9472	2	good
GAACTCTTCTG	NZ169	60218	11.4374	9	0.698811	0.154094	3.33061	3.35929	-6.52116	0.136478	0.606376	0.466556	502.444	122.357	41	3.30598	3	bad
GAACTCTTCTG	NZ170	61595	11.699	8	0.78094	0.189894	3.58753	3.61135	-6.9358	0.142234	0.661182	0.389547	398.786	93.2376	0	3.46021	3	bad
GAACTCTTCTG	NZ186	1739495	330.388	18	1.61179	0.0959487	1.68383	1.72869	4.4492	0.243461	0.499687	2.59149	1194.13	640.622	25	3.18253	1	bad
GAACTCTTCTG	NZ250	3630617	689.576	9	1.28366	0.0832513	2.76353	2.72233	10.9261	0.321318	1.28248	0.28331	903.648	959.362	56	1.91624	0	bad
GAAGAGTCCGT	MS157	1398232	265.571	4	1.29646	0.0690542	1.51218	1.49671	-5.47233	0.291597	0.981227	0.313333	1386.44	1448.21	8	1.42716	0	bad
GAAGAGTCCGT	MS81	340394	64.6522	51	0.550641	0.244072	5.56188	5.57939	-48.9583	0.202248	0.4967	0.141528	268.281	41.9304	8	5.51966	5	bad
GAAGAGTCCGT	NZ169	51305	9.74454	7	0.852802	0.126057	3.31724	3.29169	-4.59091	0.0896622	0.638786	0.4689	501.33	124.625	36	3.28205	3	bad
GAAGAGTCCGT	NZ170	1605770	304.99	211	0.399823	0.0685002	0.866287	0.894742	-7.85803	0.835321	0.892427	0.232449	2296.57	747.305	2	1.49687	2	bad
GAAGAGTCCGT	NZ186	2351280	446.587	350	0.373707	0.155081	1.94034	1.97411	-13.8081	0.411246	0.319055	0.0618129	289.541	108.692	2	1.98405	2	good
GAAGAGTCCGT	NZ250	2988798	567.673	30	1.27118	0.115842	4.92551	4.89431	-8.04002	0.279254	3.17674	0.320544	355.383	227.819	3	1.53466	0	bad
GAAGATTATCG	MS157	397639	75.525	68	0.360571	0.163733	1.85215	1.85192	-6.04379	0.573162	0.398636	0.0800004	409.094	159.848	11	1.80228	2	good
GAAGATTATCG	MS81	120114	22.8137	7	1.50624	0.128842	6.31204	6.3398	-5.839	0.11753	0.815888	0.100161	350.619	54.8934	8	5.43324	5	bad
GAAGATTATCG	NZ169	26082	4.95385	4	0.869412	0.221396	5.90553	5.91234	-4.15162	0.112062	0.885077	0.744971	391.12	60.7886	9	5.52213	6	bad
GAAGATTATCG	NZ170	786013	149.29	120	0.3602	0.0884093	2.41889	2.42439	-13.9797	0.664155	0.417885	0.723475	162.792	52.3161	17	2.43628	2	good
GAAGATTATCG	NZ186	1275219	242.207	10	1.38571	0.202758	1.02732	1.05765	4.91324	0.249867	0.666763	0.347236	1887.75	1701.93	3	1.30655	0	bad
GAAGATTATCG	NZ250	17004	3.22963	0	1.62056	0.085346	4.32651	4.34557	32.565	0.0324928	1.42562	0.212946	360.13	105.041	0	2.64027	2	bad
GAAGCGGAGAG	MS157	1150691	218.555	166	0.388783	0.0826613	1.89031	1.89841	-8.49013	0.407686	0.331824	0.0693328	210.467	83.2066	5	1.90313	2	good
GAAGCGGAGAG	MS81	131397	24.9567	13	1.01635	0.0723443	1.94193	1.9688	-12.8434	0.0534268	0.486669	0.0652039	750.137	273.422	17	1.96733	2	bad
GAAGCGGAGAG	NZ169	2647630	502.874	142	1.0317	0.143339	10.2764	10.2655	-50.0179	0.290822	1.86939	2.08882	194.772	42.4848	1	5.99126	4	bad
GAAGCGGAGAG	NZ170	1222455	232.185	163	0.390593	0.203823	2.57323	2.5853	-20.1497	0.751367	0.529056	0.691649	274.036	80.7651	4	2.66458	2	good
GAAGCGGAGAG	NZ186	1851125	351.591	295	0.321024	0.0653097	1.96631	1.97039	-7.96964	0.45639	0.260049	0.0786965	43.8427	17.4634	17	1.94587	2	good
GAAGCGGAGAG	NZ250	28352	5.385	4	0.896445	0.113776	2.11444	2.08109	-3.89622	0.0916822	0.898343	0.0329463	864.25	301.479	0	1.99012	2	bad
GAAGGCTCGAC	MS157	533620	101.352	88	0.332118	0.0558765	1.95651	1.95382	-8.90125	0.343906	0.282064	0.0675703	97.8125	37.8473	4	1.94587	2	good
GAAGGCTCGAC	MS81	2669882	507.1	394	0.388238	0.205974	3.30798	3.29903	-11.1933	0.463162	0.363202	0.132452	187.32	46.1646	13	3.23039	3	good
GAAGGCTCGAC	NZ169	60623	11.5143	7	0.911205	0.162498	2.20711	2.24075	-5.53098	0.0856114	0.644824	0.268349	824.261	280.084	4	2.12858	2	bad
GAAGGCTCGAC	NZ170	863039	163.92	130	0.385414	0.093133	2.15225	2.15485	-9.39855	0.674995	0.465785	0.451413	312.625	114.883	17	2.14739	2	good
GAAGGCTCGAC	NZ186	299182	56.8247	10	1.57624	0.104462	2.18628	2.20076	16.6024	0.0934902	0.60455	0.0826726	775.426	279.274	39	2.03723	2	bad
GAAGGCTCGAC	NZ250	12926	2.45508	2	1.03698	0.210188	5.30936	5.31765	-41.3137	0.0407418	1.38826	0.266871	440.009	75.1415	0	5.09801	6	bad
GACACCAATCT	MS157	2804565	532.681	11	1.16312	0.178094	4.3381	4.2562	-9.33068	0.357311	2.07202	0.0579652	176.618	124.692	31	1.37493	0	bad
GACACCAATCT	MS81	6048324	1148.78	950	0.315013	0.0998493	1.981	2.00526	-10.8247	0.47258	0.276561	0.0531115	122.696	46.4783	0	1.96714	2	good
GACACCAATCT	NZ169	212923	40.4412	16	1.09425	0.165184	3.81586	3.78138	-18.3261	0.210593	0.474975	0.260754	321.5	68.4866	2	3.82336	4	bad
GACACCAATCT	NZ170	2320885	440.814	341	0.378584	0.116748	2.32514	2.33096	-18.5067	0.685736	0.474229	0.676463	274.614	90.801	19	2.34568	2	good
GACACCAATCT	NZ186	3180265	604.039	530	0.321053	0.141857	1.57313	1.51551	-5.17343	0.802496	0.487205	0.0457113	407.489	183.915	2	1.43552	2	good
GACACCAATCT	NZ250	51098	9.70522	6	0.944518	0.205169	4.50254	4.52038	-4.35892	0.173825	0.753278	0.222111	449.745	95.6153	1	3.91833	4	bad
GACCTTGGACT	MS157	834230	158.448	6	0.953041	0.0652821	1.02541	1.04208	-3.82778	0.188931	0.698036	1.4312	1640.3	1685.58	6	1.43932	0	bad
GACCTTGGACT	MS81	1366942	259.628	230	0.300608	0.0544287	2.03648	2.02114	-10.0837	0.448855	0.275846	0.066729	173.227	64.0058	0	1.9831	2	good
GACCTTGGACT	NZ169	65527	12.4458	8	0.88066	0.173565	2.9467	2.90026	-5.91608	0.118131	0.674162	0.254044	636.186	178.264	4	2.76296	3	bad
GACCTTGGACT	NZ170	1073010	203.801	36	1.4046	0.129224	10.4921	10.474	-167.863	0.155151	1.70759	2.24789	152.327	30.7146	17	5.29554	4	bad
GACCTTGGACT	NZ186	2860198	543.247	467	0.296639	0.0628101	2.11166	2.12165	-23.0868	0.618267	0.267219	0.0856815	117.707	38.9083	40	2.14853	2	good
GACCTTGGACT	NZ250	3421131	649.787	555	0.337039	0.198539	1.97486	1.99178	-14.3976	0.650019	0.391814	0.195641	358.526	135.291	4	2.00988	2	good
GACGCGTTAAC	MS157	2327531	442.076	46	1.28578	0.181023	4.1225	4.05826	-23.1046	0.264716	2.62144	-0.42763	422.783	249.234	0	1.44881	0	bad
GACGCGTTAAC	MS81	583756	110.875	92	0.349893	0.18987	1.92051	1.95724	-14.3648	0.355997	0.316293	0.0529605	261.9	100.585	0	1.9453	2	good
GACGCGTTAAC	NZ169	49358	9.37474	8	0.667997	0.119907	2.27877	2.27446	-4.97617	0.0966781	0.642195	0.199084	796.539	267.404	1	2.18936	2	bad
GACGCGTTAAC	NZ170	1847337	350.871	281	0.389954	0.0692713	1.91639	1.92123	-3.22478	0.802307	0.51643	0.182808	274.112	113.517	66	1.65185	2	good
GACGCGTTAAC	NZ186	841844	159.894	20	1.46078	0.0581618	1.05741	1.06395	7.96767	0.273255	0.450207	1.05414	1808.08	1034.22	30	1.51282	1	bad
GACGCGTTAAC	NZ250	3515289	667.671	410	0.759479	0.138634	2.29271	2.29276	22.8776	0.459521	0.665133	0.17797	681.839	235.967	4	2.17265	2	bad
GACGGCATCAA	MS157	1431005	271.796	242	0.311514	0.0831878	1.95503	1.97437	-9.15016	0.460187	0.290091	0.0714447	160.331	62.4694	1	1.94663	2	good
GACGGCATCAA	MS81	2500853	474.996	379	0.390919	0.135972	1.97069	1.99327	-12.9951	0.385438	0.348954	0.0537586	392.694	151.269	1	1.96144	2	good
GACGGCATCAA	NZ169	36229	6.8811	5	0.765961	0.0977831	2.25019	2.24678	-3.76183	0.0821804	0.709859	0.146363	860.12	298.623	25	2.04027	2	bad
GACGGCATCAA	NZ170	244950	46.5242	5	1.79046	0.0871984	2.39087	2.4183	-5.2184	0.0929264	0.77969	0.140539	788.063	281.264	13	2.03419	2	bad
GACGGCATCAA	NZ186	2298476	436.558	386	0.314622	0.145372	2.12292	2.13609	-15.4981	0.529996	0.315161	0.070448	162.338	58.4672	3	2.10693	2	good
GACGGCATCAA	NZ250	29977	5.69364	2	1.28579	0.08259	3.93411	3.87931	-7.68789	0.0686706	1.03241	0.143447	644.321	127.352	0	3.99658	4	bad
GACGGTCACCT	MS157	1894315	359.794	6	1.32433	0.117971	5.39033	5.34655	37.9743	0.245751	0.993969	6.25721	334.157	176.143	10	5.41747	1	bad
GACGGTCACCT	MS81	2978995	565.811	498	0.324913	0.153567	5.90206	5.88573	-13.9507	0.438982	0.310286	0.129487	54.2339	8.28937	9	5.83362	6	bad
GACGGTCACCT	NZ169	2784441	528.859	156	1.11864	0.18739	3.86154	3.86228	-51.762	0.362602	2.14493	0.882803	532.403	204.541	1	2.02165	1	bad
GACGGTCACCT	NZ170	1416018	268.949	212	0.357737	0.108614	2.20326	2.23674	-22.0201	0.652562	0.407087	0.635732	219.871	73.2799	0	2.26876	2	good
GACGGTCACCT	NZ186	1902279	361.307	286	0.487165	0.225185	5.8468	5.8736	-3.79924	0.620194	0.729606	0.18909	316.421	58.3695	13	5.53086	6	bad
GACGGTCACCT	NZ250	2971596	564.406	464	0.318991	0.0997484	1.93986	1.98053	-10.2593	0.66052	0.372122	0.165954	132.571	52.4509	11	1.98139	2	good
GACTAGAGGAA	MS157	317503	60.3045	52	0.369858	0.0538816	1.93455	1.92418	-8.87091	0.320267	0.35643	0.0718092	276.618	105.447	8	1.92802	2	good
GACTAGAGGAA	MS81	1011574	192.132	153	0.333111	0.144526	1.94079	1.95902	-17.6468	0.491346	0.31029	0.0535907	249.944	93.426	0	1.95043	2	good
GACTAGAGGAA	NZ169	17202	3.26724	2	1.03279	0.190759	3.4165	3.43192	-20.9984	0.033183	1.14507	0.280267	610.987	140.095	14	3.54587	3	bad
GACTAGAGGAA	NZ170	110518	20.9911	2	1.84718	0.127455	5.24254	5.26522	-44.5795	0.0291499	1.53923	0.367747	473.629	104.214	6	3.80418	3	bad
GACTAGAGGAA	NZ186	651916	123.821	109	0.311149	0.0699314	1.96539	1.96044	-8.38593	0.388136	0.262345	0.060293	66.9012	26.5434	4	1.9472	2	good
GACTAGAGGAA	NZ250	11191	2.12555	0	1.43419	0.0705197	7.55964	7.58097	39.9149	-0.004033	1.35071	0.331363	181.602	32.8997	8	4.94093	4	bad
GACTCCTGCTC	MS157	2473798	469.857	11	0.810636	0.0821786	7.20433	7.18272	-11.9558	0.47169	2.98241	0.37835	160.608	60.1992	15	2.35935	0	bad
GACTCCTGCTC	MS81	158710	30.1443	20	0.799049	0.160834	3.26813	3.2765	-31.2658	0.117251	0.430345	0.0789711	342.353	83.1856	1	3.23837	3	bad
GACTCCTGCTC	NZ169	58352	11.083	9	0.637819	0.136597	2.15952	2.14459	-5.68237	0.120988	0.574674	0.195727	733.797	245.638	4	2.151	2	bad
GACTCCTGCTC	NZ170	459670	87.3067	12	1.68828	0.128176	2.596	2.60616	12.9196	0.0696887	0.717161	0.3593	624.342	201.678	15	2.24387	2	bad
GACTCCTGCTC	NZ186	2930630	556.625	493	0.28068	0.0331793	1.97578	1.97806	-6.50967	0.46902	0.217844	0.060293	25.8269	10.3637	0	1.9472	2	good
GACTCCTGCTC	NZ250	75244	14.2914	6	1.16836	0.166439	8.24029	8.25515	-3.55118	0.236378	1.20377	0.591123	261.837	40.0009	22	6.01481	4	bad
GAGAACACATA	MS157	1256927	238.733	211	0.32764	0.0478283	1.96101	1.96397	-7.91276	0.404819	0.285104	0.0714035	3462.29	10493	0	1.94891	2	good
GAGAACACATA	MS81	4817737	915.05	633	0.724648	0.10169	2.09828	2.10369	-21.8145	0.144111	0.724112	0.0532466	4033.74	15.419	9	2.03324	2	bad
GAGAACACATA	NZ169	774307	147.067	13	1.27657	0.0810579	2.58584	2.61907	7.02024	0.17997	0.632468	25.3595	3894.82	-135612	1	3.96429	1	bad
GAGAACACATA	NZ170	1665553	316.344	249	0.369005	0.143348	2.26594	2.26395	-22.5793	0.637889	0.426898	0.669026	3572.39	9703.84	36	2.28547	2	good
GAGAACACATA	NZ186	2356414	447.562	384	0.306629	0.158702	1.52997	1.51526	-6.61711	0.777356	0.494848	0.0102412	3675.6	3325.48	2	1.48604	2	good
GAGAACACATA	NZ250	35957	6.82944	4	0.834441	0.121443	2.18325	2.15005	-3.22705	0.101512	0.76193	0.0514168	3949.96	2133.1	30	1.99981	2	bad
GAGAGAATCTC	MS157	1012375	192.284	149	0.333659	0.144903	3.38274	3.40466	-3.42985	0.748021	0.768007	0.206487	234.644	55.4162	2	3.02431	4	bad
GAGAGAATCTC	MS81	239271	45.4456	27	0.904201	0.101578	1.9303	1.94923	-71.3911	0.103614	0.379621	0.0652039	508.949	195.37	10	1.96733	2	good
GAGAGAATCTC	NZ169	51085	9.70275	7	0.865773	0.183634	1.98402	2.01846	-4.75732	0.0900175	0.622861	0.178491	858.985	309.742	4	1.98689	2	bad
GAGAGAATCTC	NZ170	1141185	216.749	168	0.365292	0.0852689	1.91587	1.92043	-7.07696	0.77863	0.514314	0.576247	298.486	108.782	11	1.89573	2	good
GAGAGAATCTC	NZ186	1763625	334.972	264	0.364445	0.0368827	1.96784	1.95562	-8.00613	0.387547	0.276692	0.0646098	129.36	50.035	2	1.94131	2	good
GAGAGAATCTC	NZ250	25145	4.77588	3	1.01118	0.119644	4.44773	4.48136	-8.1224	0.0947924	1.00451	0.254319	540.275	107.722	1	4.33466	4	bad
GAGCAATGCCA	MS157	1564625	297.175	262	0.31221	0.0645932	1.97593	1.97969	-7.12196	0.454907	0.261581	0.0693428	55.0945	21.0579	3	1.95233	2	good
GAGCAATGCCA	MS81	6098996	1158.4	938	0.332696	0.149652	1.99016	1.98386	-11.5968	0.499305	0.304421	0.0442182	239.8	91.4634	12	1.95366	2	good
GAGCAATGCCA	NZ169	85560	16.2507	13	0.58726	0.129711	1.97721	2.00585	-9.60181	0.107348	0.490194	0.139184	735.532	269.428	2	2.02887	2	bad
GAGCAATGCCA	NZ170	1232740	234.139	148	0.454214	0.173396	2.36381	2.34997	-16.6312	0.577787	0.472217	0.72521	364.448	112.26	1	2.37873	2	good
GAGCAATGCCA	NZ186	2976353	565.309	511	0.272111	0.0340171	1.9837	1.98266	-6.2924	0.479512	0.218531	0.060293	12.73	4.84058	2	1.9472	2	good
GAGCAATGCCA	NZ250	90953	17.275	11	0.856937	0.151942	2.88399	2.90366	-9.39286	0.133508	0.561889	0.162174	538.914	149.486	0	2.87939	3	bad
GAGGCCATAGT	MS157	301233	57.2142	48	0.390993	0.0793376	1.94163	1.94662	-8.95401	0.287628	0.355204	0.0674647	329.549	127.202	36	1.94986	2	good
GAGGCCATAGT	MS81	79851	15.1664	4	1.49904	0.0649533	2.33032	2.32587	-3.94067	0.08016	0.750352	0.0649678	834.675	300.224	0	1.96315	2	bad
GAGGCCATAGT	NZ169	42944	8.15651	6	0.645864	0.200718	4.81667	4.81666	-3.9645	0.154877	0.702262	0.679232	385.371	68.8122	18	4.63704	5	bad
GAGGCCATAGT	NZ170	574064	109.034	82	0.395015	0.0983453	1.88661	1.84078	-4.30042	0.755364	0.65266	0.569425	472.346	186.387	2	1.69991	1	good
GAGGCCATAGT	NZ186	850203	161.482	106	0.605438	0.134936	4.47942	4.5148	-3.71866	0.467138	0.927807	0.272694	428.401	83.4126	24	4.84027	4	bad
GAGGCCATAGT	NZ250	1319885	250.69	201	0.400088	0.165619	3.35798	3.37771	-8.73948	0.651321	0.5192	0.315643	287.805	70.411	4	3.35024	3	bad
GAGGCTCGGAT	MS157	720944	136.931	3	0.842526	0.0214493	5.54626	5.53137	-5.3406	0.234949	1.33419	7.32236	521.624	679.659	0	4.13086	0	bad
GAGGCTCGGAT	MS81	2145830	407.565	323	0.358735	0.127859	1.9522	1.97539	-17.6746	0.354862	0.305205	0.0558268	258.579	100.376	6	1.96809	2	good
GAGGCTCGGAT	NZ169	40443	7.68148	6	0.622778	0.164453	3.1264	3.10221	-4.27563	0.110581	0.614362	0.427841	570.159	145.927	3	3.11738	3	bad
GAGGCTCGGAT	NZ170	745867	141.665	109	0.377421	0.0729531	2.24723	2.22023	-20.7508	0.611757	0.426455	0.672327	238.481	78.1394	10	2.26971	2	good
GAGGCTCGGAT	NZ186	1479288	280.966	137	0.969501	0.21384	2.14648	2.13947	-16.0085	0.362263	1.60102	0.0632118	978.413	442.101	18	1.51206	2	bad
GAGGCTCGGAT	NZ250	22146	4.20627	2	1.32223	0.070825	2.40045	2.41275	-33.8959	0.0407878	1.44616	0.0664296	831.002	279.117	1	1.94815	2	bad
GAGTAAGCTGA	MS157	574112	109.043	95	0.337523	0.0396762	1.95927	1.94078	-8.12315	0.384562	0.298392	0.0698087	137.476	52.8776	0	1.93485	2	good
GAGTAAGCTGA	MS81	195352	37.1039	8	1.65569	0.176482	2.22522	2.23108	-9.53734	0.0782294	0.714267	0.0665242	843.516	298.858	0	1.99278	2	bad
GAGTAAGCTGA	NZ169	129280	24.5546	7	1.44773	0.157371	5.7887	5.73958	-5.27679	0.0792872	1.1108	0.284564	324.789	72.1987	2	3.62298	4	bad
GAGTAAGCTGA	NZ170	865498	164.387	27	1.47319	0.157034	13.0752	13.0628	-9.47065	0.0511522	2.12722	2.23275	143.977	25.5911	12	5.64103	4	bad
GAGTAAGCTGA	NZ186	1187237	225.496	193	0.305375	0.208351	2.11991	2.14297	-7.19253	0.577662	0.27749	0.0582252	4.80709	1.70153	4	2.10617	2	good
GAGTAAGCTGA	NZ250	11726	2.22716	2	1.18097	0.159311	6.97166	6.9261	194.295	0.0312222	1.48879	0.329259	370.263	63.1144	7	5.1189	6	bad
GAGTGACATAT	MS157	895127	170.015	145	0.336514	0.0833661	1.94656	1.97234	-11.518	0.43397	0.312405	0.0686791	212.685	80.9966	0	1.96125	2	good
GAGTGACATAT	MS81	3217027	611.021	510	0.356403	0.0773939	1.96755	1.97053	-12.2907	0.392735	0.321121	0.0541778	270.906	103.266	0	1.9548	2	good
GAGTGACATAT	NZ169	32099	6.09668	5	0.707623	0.0711306	2.16171	2.18118	-3.4619	0.092908	0.667995	0.0619961	849.688	292.666	15	2.06724	2	bad
GAGTGACATAT	NZ170	1011524	192.122	146	0.367109	0.205453	2.5228	2.49963	-28.6291	0.74131	0.485278	0.832609	281.493	81.4471	138	2.59886	2	good
GAGTGACATAT	NZ186	1622301	308.129	269	0.340001	0.144015	1.79168	1.79392	-7.40698	0.487556	0.374271	0.0746009	277.93	115.321	3	1.8452	2	good
GAGTGACATAT	NZ250	12787	2.42868	0	1.33104	0.0389354	3.85871	3.81842	8.58215	0.200486	0.316325	0.165944	71.9485	17.5989	15	2.16847	1	bad
GAGTTGTCGTG	MS157	1154143	219.21	194	0.323043	0.10707	1.90627	1.91774	-8.86206	0.452034	0.304699	0.0719982	154.248	62.7005	9	1.90275	2	good
GAGTTGTCGTG	MS81	1050468	199.519	165	0.338204	0.0834493	1.9626	1.9645	-12.6472	0.390595	0.29788	0.0530709	281.895	106.163	2	1.9472	2	good
GAGTTGTCGTG	NZ169	1902407	361.331	282	0.342824	0.0694753	2.41199	2.40806	-19.6106	0.721612	0.423197	0.640883	144.728	44.5349	6	2.44805	2	good
GAGTTGTCGTG	NZ170	483917	91.9121	7	1.4855	0.137168	2.10445	2.08317	30.6902	0.173091	0.880531	0.768235	1059.3	535.803	0	1.90104	1	bad
GAGTTGTCGTG	NZ186	1843071	350.061	313	0.275196	0.0463766	1.96752	1.97141	-7.03126	0.446257	0.219177	0.060293	16.1529	6.27316	31	1.9472	2	good
GAGTTGTCGTG	NZ250	2905754	551.9	16	1.12183	0.203075	4.01366	3.91628	-14.1697	0.28932	2.04583	0.0441844	295.335	252.542	0	1.32023	0	bad
GATACTGTGCC	MS157	66821	12.6915	4	1.58214	0.118333	2.3989	2.40234	-3.84341	0.0289673	0.897396	0.0720308	906.542	326.463	6	2.0057	2	bad
GATACTGTGCC	MS81	3721095	706.761	623	0.312787	0.105868	1.96086	1.95829	-12.4871	0.419919	0.294461	0.0648131	179.632	69.895	1	1.94796	2	good
GATACTGTGCC	NZ169	53898	10.237	8	0.649301	0.190466	4.06118	4.08674	-5.59561	0.118517	0.591941	0.501938	465.337	95.1337	0	4.10655	4	bad
GATACTGTGCC	NZ170	1522936	289.257	210	0.383986	0.166706	2.97921	3.01526	-16.9947	0.72693	0.534634	0.912837	217.343	52.763	0	3.0754	3	good
GATACTGTGCC	NZ186	2022406	384.123	327	0.314282	0.0640651	1.86529	1.86609	-7.16419	0.557122	0.285304	0.074679	67.6966	26.8323	15	1.83894	2	good
GATACTGTGCC	NZ250	22745	4.32004	3	0.955551	0.192145	5.34868	5.32587	-10.741	0.111119	1.04309	0.0722478	391.308	69.2814	33	5.35081	5	bad
GATATCCTCGC	MS157	1438414	273.203	231	0.333136	0.120802	2.8349	2.8461	-3.24147	0.731034	0.550771	0.0335321	66.7	23.1431	2	2.43514	2	good
GATATCCTCGC	MS81	3773942	716.798	566	0.381973	0.148666	3.28454	3.31341	-30.7999	0.348831	0.351333	-7.09088e-05	175.85	43.1724	0	3.32061	3	bad
GATATCCTCGC	NZ169	3734166	709.243	567	0.335841	0.129998	3.97481	3.9843	-32.4584	0.726987	0.52415	1.20384	111.361	24.3123	0	4.11833	4	bad
GATATCCTCGC	NZ170	444779	84.4784	12	1.71948	0.153618	3.99047	4.00454	22.3756	0.0411977	0.612415	0.417712	352.639	80.1714	50	3.65869	4	bad
GATATCCTCGC	NZ186	2608319	495.407	413	0.324785	0.0585031	1.91813	1.92844	-7.21426	0.470021	0.265197	0.0556597	28.1449	11.0058	9	1.91111	2	good
GATATCCTCGC	NZ250	55181	10.4807	3	1.57436	0.15628	2.14067	2.19308	-5.86187	0.0334028	1.03269	0.0370119	1016.23	358.533	3	1.9472	2	bad
GATCAGCTATC	MS157	41918	7.96163	2	1.4848	0.148525	2.36392	2.38715	-11.7207	0.0842444	1.19999	0.152146	884.454	305.354	4	2.09041	2	bad
GATCAGCTATC	MS81	145232	27.5844	13	1.15568	0.0467038	2.04444	2.03129	-129.762	0.116436	0.507461	0.0669844	794.188	287.577	7	1.98727	2	bad
GATCAGCTATC	NZ169	2311270	438.988	69	0.91598	0.197757	10.603	10.6167	55.7977	0.444303	2.02488	4.36321	211.097	82.7249	0	5.43666	1	bad
GATCAGCTATC	NZ170	60373	11.4669	8	0.756298	0.188483	2.46264	2.45344	-5.70141	0.151797	0.709391	0.485182	711.413	233.45	0	2.29079	2	bad
GATCAGCTATC	NZ186	341268	64.8182	16	1.43585	0.115592	2.12256	2.11832	16.3609	0.10457	0.575716	0.0674015	757.9	262.512	25	2.01045	2	bad
GATCAGCTATC	NZ250	41178	7.82108	4	1.13638	0.106113	3.80168	3.78217	-4.48082	0.162591	0.962461	0.191162	564.516	140.574	0	3.17094	3	bad
GATTGATCTCC	MS157	1713367	325.426	284	0.312011	0.0673176	1.91053	1.9437	-7.2925	0.459396	0.255905	0.063843	52.428	21.0792	2	1.92517	2	good
GATTGATCTCC	MS81	4948187	939.827	747	0.33148	0.165235	4.75462	4.73904	-110.188	0.675625	0.460827	0.0182895	112.851	19.1159	2	4.83704	4	bad
GATTGATCTCC	NZ169	81907	15.5569	11	0.718559	0.120073	1.97187	1.98873	-8.03821	0.0609968	0.498635	0.148107	802.446	294.934	8	2.00456	2	bad
GATTGATCTCC	NZ170	2452137	465.743	61	1.06315	0.219983	3.39486	3.27937	32.5191	0.480201	1.8732	0.280597	507.727	225.89	3	1.66496	0	bad
GATTGATCTCC	NZ186	2800846	531.975	445	0.315299	0.0714659	1.97264	1.98144	-7.57802	0.450366	0.241889	0.0607606	42.8068	16.4361	45	1.95594	2	good
GATTGATCTCC	NZ250	63274	12.0179	4	1.07065	0.168648	7.4888	7.49689	-3.93831	0.271222	0.965523	0.381616	274.322	48.5952	39	6.02564	4	bad
GATTGTCCAGA	MS157	1569284	298.06	250	0.371295	0.0443898	1.93912	1.95156	-9.34701	0.351195	0.321371	0.0738591	202.666	76.6657	9	1.95708	2	good
GATTGTCCAGA	MS81	4302476	817.184	665	0.334486	0.106245	1.93325	1.97812	-10.5426	0.507153	0.304602	0.0546235	157.122	62.3625	8	1.93428	2	good
GATTGTCCAGA	NZ169	61848	11.747	9	0.69598	0.1254	4.21623	4.24087	-6.18522	0.109981	0.573502	0.443279	357.781	71.3039	2	4.27426	4	bad
GATTGTCCAGA	NZ170	2185995	415.194	301	0.388544	0.18608	1.66803	1.65894	-9.00905	0.731513	0.517287	0.469434	475.572	193.849	7	1.6226	2	bad
GATTGTCCAGA	NZ186	2984609	566.877	441	0.367087	0.0404331	1.9681	1.9765	-8.58621	0.361218	0.265854	0.0607148	128.304	49.7202	7	1.95176	2	good
GATTGTCCAGA	NZ250	3506308	665.965	553	0.311503	0.0583824	1.96339	2.00322	-16.3373	0.728527	0.35836	0.201078	92.614	36.1653	0	2.01804	2	good
GCAAGCACTGG	MS157	2398721	455.598	7	1.26507	0.124138	2.0847	2.01241	9.85995	0.321748	1.25177	0.168997	1181.92	1214.64	0	1.43894	0	bad
GCAAGCACTGG	MS81	120804	22.9447	13	0.94881	0.119556	2.05825	2.04641	-26.1496	0.128613	0.524673	0.0536661	660.809	233.52	0	2.04349	2	bad
GCAAGCACTGG	NZ169	48586	9.22811	7	0.732474	0.0974518	3.3964	3.4155	-5.03173	0.146245	0.655212	0.443857	493.932	124.658	5	3.21443	3	bad
GCAAGCACTGG	NZ170	1701814	323.232	246	0.384085	0.132969	1.8946	1.91121	-8.30817	0.733588	0.477206	0.507401	391.568	148.241	12	1.8963	2	good
GCAAGCACTGG	NZ186	3740852	710.513	20	1.32556	0.200651	0.826154	0.827407	2.61932	0.384882	0.558495	0.27123	2421.57	2338.9	0	1.32137	0	bad
GCAAGCACTGG	NZ250	3511982	667.043	495	0.367732	0.108805	1.8949	1.91274	-33.3864	0.64869	0.371552	0.199914	212.979	81.0087	2	1.95518	2	good
GCACAATCGTC	MS157	1628847	309.373	242	0.332529	0.180538	5.12156	5.10056	-4.72561	0.809178	0.624394	0.247655	112.355	19.2541	49	4.84008	5	bad
GCACAATCGTC	MS81	3450801	655.423	556	0.317615	0.081029	2.00286	2.02463	-14.5384	0.449037	0.297183	0.0661215	177.676	66.9326	5	2.00703	2	good
GCACAATCGTC	NZ169	67773	12.8724	10	0.59298	0.225831	1.98178	2.00855	-6.52545	0.0591337	0.528863	0.141777	821.161	295.26	44	2.02735	2	bad
GCACAATCGTC	NZ170	2136205	405.737	183	0.470149	0.092908	2.54278	2.57099	-42.6083	0.872938	2.2042	0.21334	844.499	235.622	69	1.8207	0	bad
GCACAATCGTC	NZ186	2747348	521.813	406	0.366027	0.0295986	1.96563	1.95902	-8.21657	0.375084	0.274174	0.0646098	100.565	39.2331	49	1.94131	2	good
GCACAATCGTC	NZ250	3632780	689.987	513	0.400402	0.0711254	2.00944	2.01218	-16.1362	0.562831	0.3509	0.201916	247.155	93.1627	25	2.04843	2	good
GCACCGCAATT	MS157	623766	118.474	105	0.351241	0.0485514	1.90654	1.93362	-8.31903	0.383006	0.323837	0.0710405	209.549	81.0174	16	1.92953	2	good
GCACCGCAATT	MS81	2831575	537.811	487	0.297343	0.126004	1.93254	1.96041	-17.8147	0.368315	0.282418	0.0548936	141.597	53.6564	2	1.95252	2	good
GCACCGCAATT	NZ169	2276481	432.38	337	0.371059	0.11361	1.62894	1.62896	-6.81188	0.693415	0.434657	-0.00411537	440.94	193.676	0	1.59164	2	good
GCACCGCAATT	NZ170	229520	43.5935	6	1.77127	0.145689	2.16625	2.16537	-6.29387	0.0581901	0.686487	0.0351704	912.037	323.657	4	1.96733	2	bad
GCACCGCAATT	NZ186	1231649	233.931	202	0.345698	0.148237	3.00953	3.04278	-2.56764	0.835696	0.594437	0.096058	75.9214	24.6173	0	2.42013	2	good
GCACCGCAATT	NZ250	19233	3.65299	2	1.2348	0.194299	5.92125	5.90693	83.9771	0.0947313	1.74481	0.989943	349.558	96.0047	3	3.6133	3	bad
GCACTCCTTAA	MS157	65118	12.3681	6	1.00697	0.0820996	5.29598	5.29455	-5.0694	0.173119	0.765177	0.11782	339.42	71.1545	5	4.27825	4	bad
GCACTCCTTAA	MS81	6436766	1222.56	878	0.627271	0.219486	5.04494	5.06048	-12.176	0.240266	0.65212	0.158703	424.735	71.9359	25	5.00836	5	bad
GCACTCCTTAA	NZ169	76503	14.5305	12	0.578396	0.143061	5.28231	5.25119	-8.393	0.104646	0.523372	0.33116	310.938	50.3055	13	5.3812	5	bad
GCACTCCTTAA	NZ170	2407437	457.253	58	0.440781	0.0981176	2.62967	2.59701	-1040.39	0.883569	2.68921	0.162097	689.138	204.954	57	1.51092	0	bad
GCACTCCTTAA	NZ186	2636404	500.742	400	0.337982	0.0954848	1.94419	1.94225	-11.4073	0.426734	0.268459	0.0607406	50.8066	19.4531	30	1.94245	2	good
GCACTCCTTAA	NZ250	62942	11.9548	8	0.785803	0.189234	2.02251	2.02397	-5.51493	0.0635044	0.635457	0.0370119	894.995	321.85	10	1.9472	2	bad
GCACTCTAGGT	MS157	1472577	279.692	246	0.30983	0.0366644	1.74295	1.76249	-9.6529	0.604587	0.363411	0.0539915	151.287	62.499	15	1.7641	2	good
GCACTCTAGGT	MS81	4121886	782.884	628	0.372445	0.135009	1.86244	1.87936	-3.06055	0.869746	0.675194	0.0456082	408.366	187.069	0	1.57911	1	bad
GCACTCTAGGT	NZ169	1359626	258.239	159	0.452192	0.143454	2.12747	2.10764	-6.29355	0.724439	0.514196	0.704749	477.924	177.105	4	2.03438	2	good
GCACTCTAGGT	NZ170	611648	116.172	12	1.67104	0.19861	6.24352	6.24026	5.92718	0.0838615	0.79812	2.14242	309.977	61.0687	12	5.23818	4	bad
GCACTCTAGGT	NZ186	2351867	446.698	399	0.266919	0.0373173	1.97777	1.98519	-6.24049	0.482465	0.210906	0.060293	2.67379	1.02413	15	1.9472	2	good
GCACTCTAGGT	NZ250	45789	8.69687	0	1.37457	0.136602	4.22073	4.12368	16.9636	0.276734	1.32683	0.113597	135.4	35.9579	3	1.46059	0	bad
GCAGATCACAA	MS157	23214	4.40912	0	1.75842	0.0986592	7.9517	8.01333	23.9475	0.00470772	1.60154	0.0937119	202.878	32.6053	22	4.02412	3	bad
GCAGATCACAA	MS81	59913	11.3795	4	1.41757	0.13592	2.47242	2.52388	-3.70163	0.0524892	0.797706	0.0313209	741.892	256.483	14	2.07198	2	bad
GCAGATCACAA	NZ169	874705	166.136	43	1.36248	0.193825	3.13638	3.1198	-7.58434	0.126584	1.9695	0.749342	579.161	256.332	23	1.59715	2	bad
GCAGATCACAA	NZ170	107015	20.3257	2	1.66126	0.217929	4.19292	4.22483	-23.9983	0.0764439	1.53605	0.767584	531.708	141.166	41	3.13029	3	bad
GCAGATCACAA	NZ186	36469	6.92669	5	0.892758	0.201962	2.12086	2.12698	-3.65574	0.0760593	0.685152	0.0653403	948.303	345.66	2	1.96733	2	bad
GCAGATCACAA	NZ250	11951	2.2699	0	1.82144	0.0648589	2.88988	2.89502	4.90985	0.0200471	0.438264	0.0203582	35.4646	10.637	1	2.0133	2	bad
GCAGCTTAAGC	MS157	598626	113.699	90	0.482393	0.0753485	1.94366	1.95247	-5.26948	0.387524	0.505475	0.072836	767.113	287.792	10	1.95878	2	bad
GCAGCTTAAGC	MS81	3115838	591.802	500	0.351761	0.107301	1.89667	1.92909	-8.9918	0.45523	0.335121	0.0556743	420.502	171.186	1	1.86534	2	good
GCAGCTTAAGC	NZ169	1792943	340.54	264	0.354768	0.0701051	2.35377	2.38763	-17.1676	0.679803	0.432904	0.643007	194.327	62.4762	17	2.42108	2	good
GCAGCTTAAGC	NZ170	925763	175.833	142	0.370071	0.0918705	2.2031	2.21317	-20.5824	0.610987	0.435707	0.641576	282.544	91.8549	4	2.23419	2	bad
GCAGCTTAAGC	NZ186	1671163	317.41	13	1.6316	0.0715033	1.75686	1.78894	5.0889	0.210144	0.557979	1.13695	1199.18	641.141	3	3.05907	1	bad
GCAGCTTAAGC	NZ250	1545489	293.54	234	0.337262	0.0437565	1.99724	2.00881	-133.846	0.678454	0.338323	0.300069	154.201	58.0131	8	2.10161	2	good
GCAGTCGCCTT	MS157	1079350	205.005	151	0.393214	0.0804729	1.9502	1.97388	-10.1342	0.326134	0.317296	0.0701399	159.123	61.5306	3	1.96087	2	good
GCAGTCGCCTT	MS81	6164916	1170.92	984	0.290195	0.111465	3.99904	4.0114	-9.25951	0.545998	0.263304	0.1155	9.34323	1.80999	0	3.94264	4	good
GCAGTCGCCTT	NZ169	3490345	662.934	526	0.339415	0.137926	2.48367	2.49333	-6.59187	0.72921	0.40755	0.166751	67.5454	22.6028	3	2.42089	3	good
GCAGTCGCCTT	NZ170	1881884	357.433	271	0.400778	0.20871	4.41573	4.4362	-8.37471	0.754461	0.617783	0.883084	165.596	30.2748	27	4.41557	4	bad
GCAGTCGCCTT	NZ186	2718066	516.252	418	0.360256	0.0673435	1.97038	1.96076	-9.77017	0.351227	0.290141	0.060293	212.588	82.6543	51	1.9472	2	good
GCAGTCGCCTT	NZ250	47808	9.08034	1	1.18524	0.173776	4.45015	4.38205	21.9739	0.299329	2.68432	0.0257124	297.032	164.196	9	1.70066	1	bad
GCATCATCTAA	MS157	1740185	330.519	120	1.06492	0.132265	7.50983	7.49397	-7.8772	0.392066	2.62094	0.192855	319.618	84.7663	22	3.2963	0	bad
GCATCATCTAA	MS81	174357	33.1162	20	0.919648	0.175753	4.93944	4.9393	-307.03	0.100484	0.480656	0.0822319	221.789	39.0034	0	4.90465	5	bad
GCATCATCTAA	NZ169	3721098	706.761	579	0.310422	0.103507	2.43577	2.4565	-14.4536	0.749311	0.396867	0.681102	146.358	46.7443	37	2.46211	2	good
GCATCATCTAA	NZ170	1812353	344.227	81	1.16259	0.120208	7.88325	7.84354	1468.37	0.265975	1.81406	2.0639	243.415	62.3297	41	4.38291	1	bad
GCATCATCTAA	NZ186	2888719	548.665	430	0.36601	0.112637	1.95055	1.92335	-9.12937	0.407699	0.293778	0.0603659	162.45	64.5855	70	1.9396	2	good
GCATCATCTAA	NZ250	47507	9.02317	6	1.0092	0.121093	2.14082	2.12612	-3.16875	0.108764	0.677326	0.0711755	978.892	370.456	0	1.90389	2	bad
GCCATAGAATC	MS157	466579	88.619	11	1.75165	0.200136	5.116	5.12054	-75.5322	0.118234	0.630428	0.153922	412.103	70.5154	4	4.88756	5	bad
GCCATAGAATC	MS81	7649661	1452.93	1294	0.303811	0.106242	1.97414	2.00338	-11.0898	0.508647	0.287054	0.0523736	146.866	56.2666	6	1.96448	2	good
GCCATAGAATC	NZ169	5201343	987.909	863	0.31181	0.098807	1.98856	1.97591	-10.088	0.350059	0.244934	-0.00444131	61.3316	23.4761	11	1.98594	2	good
GCCATAGAATC	NZ170	3219310	611.455	30	0.729904	0.0790508	2.36676	2.33235	3.96371	0.669471	1.12144	0.457237	629.766	643.268	15	1.71548	0	bad
GCCATAGAATC	NZ186	3138853	596.173	541	0.25371	0.0457142	1.97729	1.9687	-6.66831	0.520634	0.219075	0.0599199	9.11394	3.5537	16	1.94131	2	good
GCCATAGAATC	NZ250	30632	5.81804	2	1.10342	0.163692	4.72181	4.71007	268.316	0.379931	2.57806	0.153158	465.106	146.459	9	2.05318	0	bad
GCCATTACGAA	MS157	80790	15.3447	2	1.73633	0.0815492	2.34797	2.37008	-10.0981	0.029493	1.22285	0.0718836	852.601	302.873	36	1.91548	2	bad
GCCATTACGAA	MS81	5465677	1038.12	807	0.354483	0.0900984	1.90905	1.94574	-16.903	0.406791	0.311286	0.0524948	290.474	113.23	17	1.92858	2	good
GCCATTACGAA	NZ169	3692506	701.331	528	0.368318	0.0886566	2.17028	2.17308	-10.9722	0.785147	0.521348	0.635986	263.639	86.0222	6	2.2	2	good
GCCATTACGAA	NZ170	1617577	307.232	238	0.367616	0.175961	2.00049	2.0069	-10.3673	0.717547	0.419442	0.540803	255.469	92.9734	15	2.00456	2	good
GCCATTACGAA	NZ186	553289	105.088	15	1.67639	0.166137	2.03286	2.02687	12.6612	0.0858339	0.482143	0.078642	696.719	257.045	8	2.09763	2	bad
GCCATTACGAA	NZ250	53813	10.2209	4	1.17444	0.152972	7.97702	7.98246	-4.01499	0.156562	0.94962	0.280659	249.051	35.5701	15	6.05907	6	bad
GCCGAAGGAGA	MS157	1354539	257.272	228	0.339179	0.150886	1.89425	1.93445	-10.6119	0.459679	0.337123	0.0725843	241.126	92.037	1	1.94207	2	good
GCCGAAGGAGA	MS81	4144202	787.123	644	0.463445	0.135288	1.87979	1.87394	-4.53307	0.730998	0.505634	0.0502986	623.177	245.594	3	1.7529	2	good
GCCGAAGGAGA	NZ169	3308553	628.405	451	0.382348	0.135532	2.62723	2.65193	-2.55363	0.886675	0.835963	0.53468	241.618	77.2707	0	2.17778	2	bad
GCCGAAGGAGA	NZ170	533075	101.249	10	1.71587	0.132776	4.53841	4.57708	14.5466	0.126678	0.783911	0.308112	354.295	83.9611	0	3.60076	3	bad
GCCGAAGGAGA	NZ186	2410262	457.79	264	0.771965	0.145959	2.09907	2.11522	-15.306	0.44337	1.42395	0.102967	1053.35	384.311	9	1.80836	2	bad
GCCGAAGGAGA	NZ250	3476340	660.274	525	0.418768	0.222262	2.05369	2.07306	-4.68826	0.516307	0.534545	0.203416	612.282	226.383	26	2.01956	2	bad
GCCTATGCTAC	MS157	1746239	331.669	259	0.378665	0.063025	1.9434	1.93865	-8.68139	0.378426	0.302954	0.0773937	171.642	65.738	13	1.93523	2	good
GCCTATGCTAC	MS81	5792378	1100.17	907	0.338931	0.161015	1.95693	1.97357	-13.8812	0.47784	0.309772	0.0552035	219.395	82.0316	9	1.94929	2	good
GCCTATGCTAC	NZ169	68253	12.9635	11	0.625174	0.176243	2.05833	2.08292	-6.89791	0.079309	0.542643	0.155379	837.88	299.345	39	2.07009	2	bad
GCCTATGCTAC	NZ170	905906	172.062	30	1.32942	0.213804	5.86919	5.87883	14.9315	0.260037	1.37508	1.23233	264.503	83.3403	14	3.60209	2	bad
GCCTATGCTAC	NZ186	2695751	512.013	418	0.328585	0.168295	3.94901	3.94882	-8.35365	0.777801	0.433353	0.177118	40.6739	8.36643	23	3.91016	3	bad
GCCTATGCTAC	NZ250	55912	10.6196	3	1.19454	0.133176	3.52976	3.53296	-16.758	0.224182	1.63086	0.080431	610.6	221.071	28	2.27578	2	bad
GCGCAAGTATT	MS157	1756034	333.53	282	0.348288	0.154801	2.73632	2.75731	-6.01688	0.705862	0.483825	0.0549294	222.435	68.2306	2	2.70522	2	good
GCGCAAGTATT	MS81	5637009	1070.66	880	0.429554	0.1011	2.10206	2.09083	-14.4817	0.386014	0.42658	0.0732603	512.249	179.571	24	2.0887	2	good
GCGCAAGTATT	NZ169	59967	11.3897	9	0.612887	0.0883525	3.24347	3.24041	-5.63558	0.0821913	0.532964	0.296501	451.663	111.847	0	3.23229	3	bad
GCGCAAGTATT	NZ170	767116	145.701	16	1.64947	0.164006	7.43221	7.41399	8.91345	0.12136	1.07287	1.98961	190.751	37.6534	1	4.57759	4	bad
GCGCAAGTATT	NZ186	3068133	582.741	425	0.51737	0.215669	3.23778	3.28242	-3.4696	0.498539	0.573945	0.0884552	457.668	121.882	0	3.07388	3	bad
GCGCAAGTATT	NZ250	4002117	760.136	566	0.398803	0.0796854	1.97303	1.99019	-14.2888	0.663462	0.440811	0.206705	312.606	118.517	0	2.00551	2	good
GCGGAATGTAT	MS157	45234	8.59145	4	1.26683	0.208141	4.18828	4.23523	-6.05878	0.135877	1.12264	-0.126099	630.88	157.911	0	3.36448	3	bad
GCGGAATGTAT	MS81	4164201	790.921	633	0.337683	0.101135	2.00526	2.02706	-16.3289	0.455426	0.318658	0.0565165	222.917	81.4662	2	2.00228	2	good
GCGGAATGTAT	NZ169	47720	9.06363	7	0.654589	0.162278	2.11827	2.10095	-4.62584	0.0983524	0.598359	0.168326	827.02	289.45	1	2.09155	2	bad
GCGGAATGTAT	NZ170	688825	130.831	16	1.62722	0.215143	6.39993	6.43087	11.5614	0.094103	1.107	1.15998	268.885	62.6483	26	4.09516	3	bad
GCGGAATGTAT	NZ186	3122186	593.008	103	0.95715	0.147721	3.13429	3.07008	66.1247	0.533776	2.29591	0.112914	625.074	323.709	3	1.44691	0	bad
GCGGAATGTAT	NZ250	3294485	625.733	466	0.425029	0.0839381	1.92213	1.95694	-9.66945	0.591577	0.480685	0.194128	399.913	146.286	0	1.97265	2	good
GCGTACCTTCT	MS157	1449774	275.361	232	0.387196	0.107875	1.89329	1.93599	-14.2144	0.423785	0.366952	0.0797076	498.453	189.838	3	1.92707	2	good
GCGTACCTTCT	MS81	5607435	1065.04	905	0.303641	0.0816644	1.95527	1.98001	-16.5263	0.44126	0.270272	0.0543551	135.474	53.0977	4	1.96125	2	good
GCGTACCTTCT	NZ169	5119238	972.315	793	0.320041	0.12639	2.17651	2.18698	-13.322	0.737972	0.38783	0.594432	186.679	65.9595	7	2.19487	2	good
GCGTACCTTCT	NZ170	2119971	402.654	307	0.370608	0.0818576	2.18878	2.19897	-22.381	0.654727	0.423957	0.660753	215.107	71.5021	8	2.26287	2	good
GCGTACCTTCT	NZ186	168527	32.0089	25	0.51552	0.047358	1.92611	1.93624	-15.9059	0.16643	0.378048	0.0696571	477.337	183.39	48	1.96144	2	good
GCGTACCTTCT	NZ250	37209	7.06724	4	0.845736	0.125964	5.74941	5.75713	-3.06674	0.209045	0.752066	0.187928	325.932	56.027	32	5.02412	4	bad
GCTACACACAG	MS157	1242043	235.906	207	0.319513	0.0699821	1.94739	1.95617	-8.4249	0.406087	0.283072	0.0732821	127.559	48.8002	0	1.95575	2	good
GCTACACACAG	MS81	251304	47.7311	23	1.12069	0.103154	1.94694	1.98144	25.5572	0.0966656	0.448988	0.0545518	677.999	251.106	2	1.97189	2	bad
GCTACACACAG	NZ169	54516	10.3544	8	0.673967	0.184982	2.01164	2.01411	-5.35278	0.114399	0.63233	0.120972	978.717	358.92	76	2.01273	2	bad
GCTACACACAG	NZ170	1644773	312.398	248	0.373399	0.0769991	1.97338	1.97633	-15.4822	0.211924	0.290155	0	195.668	75.2815	6	2	2	good
GCTACACACAG	NZ186	2342355	444.892	388	0.285193	0.0555398	1.81018	1.83661	-8.66321	0.605663	0.291523	0.0767089	32.0087	13.1007	13	1.8226	2	good
GCTACACACAG	NZ250	79640	15.1263	12	0.609907	0.185503	4.1483	4.18641	-7.48544	0.225777	0.580507	0.207083	337.566	65.5438	3	4.22203	4	bad
GCTACGTGGAC	MS157	1480351	281.168	238	0.325034	0.191818	5.18668	5.17067	-5.44715	0.744626	0.364838	0.301899	43.3586	9.5684	2	4.94207	6	bad
GCTACGTGGAC	MS81	5065862	962.177	785	0.390506	0.0573845	1.95605	1.95323	-13.8645	0.267637	0.328354	0.0530709	363.008	138.776	0	1.9472	2	good
GCTACGTGGAC	NZ169	3618636	687.3	536	0.346907	0.100385	2.24562	2.25749	-42.5086	0.690109	0.442616	0.652026	250.291	86.3617	12	2.30921	2	good
GCTACGTGGAC	NZ170	395795	75.1747	13	1.6409	0.14893	2.11526	2.13892	14.7403	0.0810279	0.561922	0.081787	700.071	247.195	35	2.00836	2	bad
GCTACGTGGAC	NZ186	2940995	558.594	465	0.326788	0.0865764	1.95991	1.94074	-8.17838	0.43687	0.261108	0.0601566	87.3485	33.9725	0	1.9415	2	good
GCTACGTGGAC	NZ250	1239354	235.395	4	1.78724	0.149959	6.85893	6.88123	-4.64757	0.116274	0.919622	0.404798	315.137	57.4883	20	4.92669	5	bad
GCTAGCGTGTT	MS157	2437808	463.021	100	1.04407	0.163355	5.78023	5.73448	-8.71456	0.371056	2.8543	-0.0428239	343.224	122.305	26	2.25033	0	bad
GCTAGCGTGTT	MS81	202428	38.4479	14	1.28589	0.113117	2.10703	2.1483	28.8172	0.123925	0.485911	0.028101	723.237	259.1	0	2.17645	2	bad
GCTAGCGTGTT	NZ169	4250629	807.337	622	0.387827	0.108021	2.227	2.23322	-20.88	0.594053	0.444418	0.611131	330.366	116.33	5	2.2471	2	good
GCTAGCGTGTT	NZ170	416985	79.1994	8	1.64451	0.0905147	1.30388	1.31857	-67.5614	0.167276	0.683988	0.276967	1613.21	837.129	15	1.55613	1	bad
GCTAGCGTGTT	NZ186	2644933	502.361	430	0.300181	0.0712175	1.96432	1.95811	-8.28125	0.438738	0.243662	0.0646098	36.8086	14.8526	2	1.94131	2	good
GCTAGCGTGTT	NZ250	41255	7.83571	4	1.10898	0.145228	5.10128	5.03663	-4.91704	0.0832076	0.950792	0.367179	390.557	81.9534	4	4.06762	4	bad
GCTGGACTGAA	MS157	1234197	234.415	202	0.306219	0.0439185	1.9823	1.97789	-6.59218	0.466704	0.243993	0.0676864	34.2927	13.4414	14	1.94663	2	good
GCTGGACTGAA	MS81	1873073	355.759	304	0.303372	0.0750452	1.95856	1.95996	-11.782	0.367253	0.246857	0.0530709	98.3152	37.9264	8	1.9472	2	good
GCTGGACTGAA	NZ169	2671969	507.496	317	0.364792	0.0981477	2.06864	2.09748	-3.81504	0.901478	1.01666	0.63356	600.54	203.833	35	2.01785	1	bad
GCTGGACTGAA	NZ170	1410946	267.986	196	0.387595	0.125654	2.22007	2.20185	-13.1732	0.696771	0.465795	0.749185	422.902	139.396	2	2.23932	2	good
GCTGGACTGAA	NZ186	1949741	370.321	327	0.296686	0.0558504	1.97142	1.97226	-6.98468	0.433468	0.238942	0.0603778	27.8253	10.6469	12	1.94587	2	good
GCTGGACTGAA	NZ250	37472	7.11719	4	1.04638	0.140798	2.7883	2.8207	-4.42086	0.149624	1.03214	0.127332	723.241	244.031	0	2.20152	2	bad
GCTGGTAATTG	MS157	2126278	403.851	347	0.37612	0.216939	3.49897	3.49431	-12.878	0.459239	0.387378	0.129841	169.214	37.9519	17	3.4963	4	bad
GCTGGTAATTG	MS81	6232573	1183.77	1016	0.310867	0.0948235	1.9967	2.00844	-15.9237	0.442023	0.292106	0.0668723	157.502	59.5644	14	1.99259	2	good
GCTGGTAATTG	NZ169	66101	12.5548	9	0.810941	0.148054	2.30626	2.30606	-10.0636	0.113116	0.634993	0.107465	775.949	263.869	6	2.1339	2	bad
GCTGGTAATTG	NZ170	1888895	358.764	277	0.360123	0.0618236	2.36868	2.36691	-22.1126	0.675898	0.433749	0.672505	201.378	64.2621	22	2.38557	2	good
GCTGGTAATTG	NZ186	1518128	288.343	21	1.67403	0.0772039	1.51539	1.48043	3.20232	0.178416	0.63559	0.693379	1117.48	602.813	27	1.43191	1	bad
GCTGGTAATTG	NZ250	34826	6.61462	0	1.46296	0.0941444	8.64244	8.65623	8.67313	0.250331	1.39666	2.18027	58.7184	10.1505	33	4.39107	1	bad
GCTGGTTGCGA	MS157	36440	6.92118	2	1.64193	0.0911653	4.7249	4.74065	154.848	0.0312017	1.75851	0.15494	446.925	111.342	6	2.91643	3	bad
GCTGGTTGCGA	MS81	969280	184.099	149	0.353852	0.114224	1.96295	1.98861	-14.835	0.404153	0.319709	0.0547149	247.067	92.0213	3	1.97056	2	good
GCTGGTTGCGA	NZ169	21959	4.17075	3	0.965117	0.148185	2.10821	2.13922	-6.73201	0.0583606	0.95209	0.208618	937.6	309.57	31	2.1736	2	bad
GCTGGTTGCGA	NZ170	352360	66.925	5	1.70768	0.234103	5.49388	5.48808	-6.208	0.0860261	1.73645	0.543629	314.925	99.6429	57	2.53428	2	bad
GCTGGTTGCGA	NZ186	324828	61.6957	6	1.73457	0.137275	2.61203	2.59819	133.79	0.0647221	0.846609	0.0756007	743.702	262.434	44	2.02203	2	bad
GCTGGTTGCGA	NZ250	12325	2.34093	0	1.15164	0.0128004	5.05084	5.04106	7.18864	0.390355	0.30793	0.0791488	42.8329	4.53551	28	3.46268	1	bad
GCTTGGCACCA	MS157	175851	33.4	8	1.57337	0.0731399	1.97833	1.97692	-9.36574	0.0808824	0.593366	0.0658895	968.628	353.552	4	1.94131	2	bad
GCTTGGCACCA	MS81	51146	9.71434	8	0.602256	0.224021	2.14887	2.13654	-6.25476	0.134654	0.590912	-0.00523818	800.57	273.574	4	2.13485	2	bad
GCTTGGCACCA	NZ169	93081	17.6792	13	0.68912	0.18813	2.29151	2.31949	-8.52729	0.278451	0.585747	0.528885	682.235	228.401	2	2.30655	2	bad
GCTTGGCACCA	NZ170	696018	132.197	10	1.84423	0.162561	2.31152	2.32474	-52.1652	0.0852922	0.632257	0.558631	718.571	240.82	48	2.2528	2	bad
GCTTGGCACCA	NZ186	46116	8.75897	8	0.644483	0.12448	6.03331	6.06942	-5.89426	0.113761	0.629232	-0.0234615	280.611	40.0531	4	6.0283	7	bad
GCTTGGCACCA	NZ250	14954	2.84027	0	1.66163	0.144176	9.73869	9.8584	16.7126	0.0326595	1.37637	0.716386	103.865	14.1845	0	5.85926	5	bad
GGAATGCTGTT	MS157	205996	39.1255	4	1.75439	0.111769	2.62624	2.61082	-3.1693	0.0927745	0.811986	0.0817791	778.27	276.901	5	2.03951	2	bad
GGAATGCTGTT	MS81	4638891	881.081	721	0.385824	0.0758634	1.94036	1.96555	-19.7752	0.364981	0.35078	0.054919	461.486	175.035	0	1.96638	2	good
GGAATGCTGTT	NZ169	66956	12.7172	10	0.714469	0.110485	2.10971	2.0795	-6.52821	0.100852	0.556244	0.106627	800.896	274.677	1	2.08395	2	bad
GGAATGCTGTT	NZ170	1665585	316.35	239	0.367803	0.102715	2.18805	2.19406	-25.1691	0.643154	0.414544	0.655884	264.93	88.4176	20	2.24824	2	good
GGAATGCTGTT	NZ186	2492182	473.349	391	0.333775	0.0675875	1.96607	1.96585	-7.64078	0.40026	0.254148	0.060293	58.406	22.6408	23	1.9472	2	good
GGAATGCTGTT	NZ250	55419	10.5259	6	1.03578	0.204245	4.25125	4.22222	-4.55922	0.136707	0.69283	0.101862	357.977	80.2885	0	3.74359	4	bad
GGAGCACCAAT	MS157	897426	170.451	137	0.363428	0.139909	2.83848	2.85499	-2.88955	0.703627	0.673475	0.167434	116.854	54.7422	9	2.37455	4	bad
GGAGCACCAAT	MS81	152455	28.9563	15	1.09177	0.147916	1.99976	2.02691	87.3673	0.0855917	0.50366	0.0652039	636.117	231.68	7	1.96733	2	bad
GGAGCACCAAT	NZ169	2698716	512.577	416	0.338733	0.12067	4.20891	4.26019	-10.5328	0.771669	0.451566	1.07854	91.0914	16.3763	21	4.26268	4	bad
GGAGCACCAAT	NZ170	1881303	357.323	262	0.379569	0.176389	4.83258	4.83864	-23.1674	0.512005	0.380959	-0.0177535	81.5808	14.1021	5	4.90883	4	bad
GGAGCACCAAT	NZ186	1542634	292.998	24	1.61356	0.131374	3.55074	3.53175	3.43471	0.0785242	0.897695	0.093616	269.907	93.4774	7	2.08319	2	bad
GGAGCACCAAT	NZ250	3213479	610.347	492	0.386748	0.103055	1.91721	1.9144	-5.40777	0.730965	0.535211	0.260185	485.998	198.487	0	1.83381	2	good
GGATATGTCCG	MS157	1599026	303.709	149	0.807498	0.144974	3.94121	3.97967	-5.09089	0.457861	1.6503	0.300552	519.593	159.015	6	2.95689	4	bad
GGATATGTCCG	MS81	145020	27.5442	16	0.930954	0.138279	1.96286	1.99716	-37.388	0.086416	0.468498	0.0652039	679.55	251.655	15	1.96733	2	bad
GGATATGTCCG	NZ169	3510484	666.759	545	0.35249	0.180146	4.43096	4.43704	-6.52805	0.755475	0.507124	0.0233632	70.5167	14.6717	6	4.34226	6	bad
GGATATGTCCG	NZ170	2018098	383.304	283	0.400905	0.086062	1.83154	1.83563	-3.73498	0.845406	0.604929	0.408992	348.27	151.51	11	1.63666	2	good
GGATATGTCCG	NZ186	2732151	518.927	420	0.326011	0.118921	2.47576	2.50666	-2.45835	0.910424	0.704573	0.105236	134.453	52.9189	24	2.07502	2	good
GGATATGTCCG	NZ250	47533	9.02811	4	1.27217	0.150596	6.54053	6.56664	-3.78458	0.0450974	0.914728	0.279671	304.406	51.4057	9	5.14454	5	bad
GGCACACGTAC	MS157	2331322	442.796	394	0.292095	0.14238	2.01599	2.00395	-5.76258	0.615085	0.266969	0.0730783	98.774	38.4754	3	1.95404	2	good
GGCACACGTAC	MS81	3731386	708.715	619	0.335843	0.104898	2.05813	2.02515	-16.5948	0.371851	0.305098	0.0546921	209.373	76.7391	9	2.02583	2	good
GGCACACGTAC	NZ169	109507	20.7991	17	0.533336	0.0720828	1.97878	2.00284	-14.8099	0.169666	0.476976	0.194423	757.412	276.939	90	2.01937	2	bad
GGCACACGTAC	NZ170	643435	122.21	19	1.67469	0.131798	2.0476	2.07413	8.23069	0.0749513	0.463291	0.148508	680.025	246.59	15	2.02849	2	bad
GGCACACGTAC	NZ186	1585884	301.213	43	1.49329	0.130862	1.35229	1.25621	3.13938	0.201266	0.517105	0.14581	1255	674.29	20	1.38632	1	bad
GGCACACGTAC	NZ250	17140	3.25546	2	1.00338	0.111589	1.88437	1.87352	-14.3507	0.0212973	1.10789	0.0370119	1003.52	350.437	25	1.9472	2	bad
GGCAGCTCGTA	MS157	1612886	306.341	261	0.326763	0.0708825	1.96349	1.97449	-8.20911	0.442966	0.276192	0.0732504	105.006	41.0467	14	1.95252	2	good
GGCAGCTCGTA	MS81	1050371	199.501	158	0.350398	0.0890481	1.97671	1.99114	-11.1101	0.47372	0.323341	0.0533293	293.771	109.93	26	1.95366	2	good
GGCAGCTCGTA	NZ169	57445	10.9107	8	0.755645	0.126365	2.08265	2.09612	-5.33675	0.100373	0.619313	0.205516	799.023	280.268	57	2.04065	2	bad
GGCAGCTCGTA	NZ170	1699463	322.785	245	0.383011	0.131076	3.85001	3.82392	-15.2417	0.661805	0.442528	1.10486	119.656	25.2368	15	3.83875	4	bad
GGCAGCTCGTA	NZ186	1584079	300.87	266	0.282894	0.040481	1.93637	1.95329	-7.07319	0.491093	0.242233	0.0596954	9.21189	3.57789	27	1.90978	2	good
GGCAGCTCGTA	NZ250	61588	11.6976	6	1.12472	0.191498	2.46865	2.5199	-4.07648	0.191471	0.851992	0.0383222	747.477	273.351	0	1.92821	2	bad
GGCATAGCTCG	MS157	377968	71.7888	2	1.82064	0.162402	4.64263	4.75815	31.0591	0.0420444	3.02165	1.90409	234.51	214.218	3	1.3358	0	bad
GGCATAGCTCG	MS81	101253	19.2313	12	0.808302	0.104921	2.02594	2.0455	-10.9787	0.138805	0.584794	0.0659241	796.231	284.801	10	1.95859	2	bad
GGCATAGCTCG	NZ169	45359	8.61519	6	0.748275	0.144849	2.08859	2.12285	-4.30186	0.168247	0.684268	0.19399	986.546	354.985	21	1.94891	2	bad
GGCATAGCTCG	NZ170	1551683	294.717	219	0.407058	0.102481	1.66036	1.61561	-3.73019	0.815792	0.610598	0.23454	530.201	237.83	31	1.43533	1	good
GGCATAGCTCG	NZ186	84208	15.9939	12	0.634382	0.156269	1.96323	1.97203	-10.1358	0.15528	0.514897	0.060293	783.609	288.149	25	1.9472	2	bad
GGCATAGCTCG	NZ250	1234340	234.443	3	1.70675	0.195846	2.43291	2.49252	-8.12649	0.0764986	1.65343	3.66351	1093.66	1017.65	34	1.29345	0	bad
GGCCGATACAG	MS157	1091392	207.292	165	0.345106	0.177756	4.76533	4.80413	-25.8475	0.722119	0.544914	0.0977026	175.111	28.8173	6	4.94283	4	bad
GGCCGATACAG	MS81	136273	25.8828	11	1.29282	0.0772686	2.0466	2.06955	-18.4569	0.0593006	0.576043	0.0652039	869.839	319.482	12	1.96733	2	bad
GGCCGATACAG	NZ169	104043	19.7613	7	1.32126	0.147147	2.6886	2.71613	-9.91102	0.10813	0.804433	0.328843	641.834	209.507	5	2.19259	2	bad
GGCCGATACAG	NZ170	1309273	248.675	191	0.372646	0.0667091	2.18737	2.19183	-22.6011	0.626751	0.406025	0.664848	213.184	71.9679	80	2.24008	2	good
GGCCGATACAG	NZ186	2356934	447.661	345	0.615682	0.0649479	2.02293	2.06617	16.7577	0.238235	0.507431	0.0889631	683.738	244.291	8	2.02925	2	bad
GGCCGATACAG	NZ250	8103	1.53903	0	1.89436	1.33227e-15	2	2	2.32381	0.0534288	8.00857e-15	0	0	0	0	2	2	bad
GGCTACACACT	MS157	1572654	298.7	258	0.323316	0.112542	1.9661	1.9613	-8.45095	0.471104	0.284234	0.067668	113.552	44.0727	0	1.9472	2	good
GGCTACACACT	MS81	3273460	621.74	497	0.461121	0.0600238	1.93903	1.9288	-20.7376	0.247121	0.42014	0.0530709	608.524	224.534	0	1.9472	2	good
GGCTACACACT	NZ169	77298	14.6815	12	0.570248	0.184197	1.96036	1.98588	-8.18923	0.145283	0.516833	0.198509	854.428	313.437	62	2.01861	2	bad
GGCTACACACT	NZ170	1817610	345.225	269	0.366618	0.0735967	2.21748	2.23587	-23.7093	0.643815	0.450062	0.671396	262.403	90.7965	4	2.25565	2	good
GGCTACACACT	NZ186	2631977	499.901	440	0.281096	0.181144	1.98417	1.98029	-8.10925	0.78132	0.453371	0.0921208	229.116	81.9255	1	1.91833	2	good
GGCTACACACT	NZ250	3264884	620.111	521	0.363095	0.184732	4.16363	4.15437	-4.97238	0.766473	0.502065	0.314531	142.609	31.6348	5	3.92118	4	bad
GGCTAGCATCG	MS157	269297	51.1485	45	0.371638	0.0431464	1.94907	1.94352	-8.91441	0.250351	0.331248	0.067668	263.612	101.975	0	1.9472	2	good
GGCTAGCATCG	MS81	87660	16.6496	5	1.47109	0.134328	5.15811	5.12702	-4.69776	0.0989067	0.743445	0.122813	449.326	84.4335	4	4.5491	4	bad
GGCTAGCATCG	NZ169	1158273	219.995	172	0.360771	0.0842284	2.19575	2.20689	-21.0478	0.638148	0.421606	0.674158	316.433	107.498	0	2.249	2	good
GGCTAGCATCG	NZ170	820204	155.784	6	0.795096	0.0713337	2.32502	2.27711	-10.161	0.364821	1.35714	0.323219	877.961	869.37	37	1.52251	0	bad
GGCTAGCATCG	NZ186	857397	162.848	133	0.354104	0.103851	1.84836	1.84874	-8.60684	0.522381	0.339538	0.0735147	144.67	58.091	12	1.84539	2	good
GGCTAGCATCG	NZ250	383746	72.8862	4	1.7402	0.226183	4.1296	4.12445	-7.65847	0.0745009	1.41293	0.0745138	514.701	173.305	12	2.54777	2	bad
GGCTGTGGCTT	MS157	802886	152.495	133	0.398083	0.118348	1.94279	1.9346	-10.4445	0.337143	0.364005	0.067668	402.793	155.551	14	1.9472	2	good
GGCTGTGGCTT	MS81	3029475	575.399	441	0.339841	0.161575	1.80061	1.82195	-7.30455	0.716487	0.40013	0.0464276	367.301	152.281	38	1.75309	2	good
GGCTGTGGCTT	NZ169	89276	16.9565	8	1.17802	0.132091	2.39729	2.38763	-9.96183	0.0582887	0.747739	0.0679882	781.895	269.297	84	2.05489	2	bad
GGCTGTGGCTT	NZ170	983579	186.815	141	0.389932	0.13657	1.64277	1.61298	-3.90577	0.750255	0.587382	0.539462	478.843	213.238	2	1.44539	2	bad
GGCTGTGGCTT	NZ186	968169	183.888	12	1.74049	0.189338	2.11261	2.14007	5.33053	0.138568	0.575868	0.060293	723.9	272.019	40	1.9472	2	bad
GGCTGTGGCTT	NZ250	20573	3.9075	2	1.40223	0.118094	5.6411	5.71186	27.8805	0.140592	1.99422	0.38476	496.55	141.169	0	2.73751	3	bad
GGCTTAATGCC	MS157	592319	112.501	96	0.351235	0.0633569	1.95597	1.95768	-8.76033	0.383249	0.30095	0.067668	168.972	65.2891	19	1.9472	2	good
GGCTTAATGCC	MS81	108541	20.6156	6	1.46975	0.0909074	2.10811	2.13891	-6.4779	0.0484679	0.623746	0.0652039	856.168	312.828	2	1.96733	2	bad
GGCTTAATGCC	NZ169	1677169	318.551	245	0.365697	0.0934839	2.23316	2.22807	-16.3078	0.651187	0.42325	0.604401	244.934	80.5832	2	2.2321	2	good
GGCTTAATGCC	NZ170	271290	51.5271	3	1.88877	0.172324	7.62501	7.63918	-4.34618	0.0241832	0.995275	0.663149	313.837	52.7594	1	5.25888	5	bad
GGCTTAATGCC	NZ186	72774	13.8222	10	0.863715	0.0794512	1.984	1.99431	-8.08619	0.0429187	0.583589	0.0653403	853.255	311.362	2	1.96733	2	bad
GGCTTAATGCC	NZ250	13639	2.5905	1	1.40949	0.128014	10.2139	10.1169	33.8737	0.0710601	1.59464	0.62704	216.617	30.198	0	5.92194	3	bad
GGTAATTGTGG	MS157	550503	104.559	89	0.371522	0.053579	1.95167	1.95283	-8.21622	0.411314	0.315295	0.0697315	252.901	97.968	14	1.9434	2	good
GGTAATTGTGG	MS81	85893	16.314	8	1.20069	0.105677	3.47549	3.47829	-7.63947	0.0673196	0.665908	0.11067	503.483	124.214	3	3.19943	3	bad
GGTAATTGTGG	NZ169	27883	5.29592	4	0.951476	0.181381	4.52243	4.50973	-4.21198	0.0578818	0.889763	0.453994	448.992	91.3798	21	4.03951	4	bad
GGTAATTGTGG	NZ170	555359	105.481	21	0.476047	0.119035	2.47774	2.40759	-8.98698	0.665937	2.48989	1.18657	888.638	344.267	15	1.71187	0	bad
GGTAATTGTGG	NZ186	1559698	296.239	231	0.358605	0.0688496	1.85893	1.83457	-9.34138	0.523902	0.339193	0.0765935	130.387	50.0589	23	1.82602	2	good
GGTAATTGTGG	NZ250	1469108	279.033	228	0.335248	0.155169	5.27591	5.25867	-8.12124	0.534607	0.33123	0.0407229	13.0121	2.12545	48	5.2359	6	bad
GGTACTTCCTT	MS157	320443	60.8629	50	0.412769	0.185512	4.6746	4.68549	-5.82773	0.6074	0.527307	0.112609	191.962	37.8083	0	4.61747	4	bad
GGTACTTCCTT	MS81	559215	106.214	88	0.351863	0.105203	1.98027	1.98763	-10.8388	0.40696	0.326339	0.0652039	260.546	98.2731	0	1.96733	2	good
GGTACTTCCTT	NZ169	25919	4.92289	4	0.769513	0.162229	3.70542	3.65443	-4.90253	0.138336	0.937725	0.661239	535.218	122.825	0	3.47958	3	bad
GGTACTTCCTT	NZ170	390459	74.1613	56	0.422685	0.182699	2.12536	2.14356	-12.5317	0.54009	0.482191	0.563833	480.298	170.073	21	2.17056	2	good
GGTACTTCCTT	NZ186	340730	64.716	35	0.998098	0.129978	2.05496	2.07797	-15.2394	0.154249	0.605006	0.0653403	814.788	293.561	0	1.96733	2	bad
GGTACTTCCTT	NZ250	680330	129.217	107	0.370717	0.147815	2.09934	2.10057	-31.7677	0.570409	0.449884	0.26894	482.445	166.999	0	2.20494	2	good
GGTAGCACCAC	MS157	1685686	320.168	8	1.67303	0.120095	4.58828	4.61272	12.3443	0.173561	1.07293	0.110038	319.703	113.584	8	2.51909	2	bad
GGTAGCACCAC	MS81	4549152	864.036	733	0.304848	0.0992644	2.01128	2.03434	-12.405	0.476475	0.277487	0.0685451	126.358	48.1724	2	2.00076	2	good
GGTAGCACCAC	NZ169	87045	16.5328	14	0.570475	0.130224	1.95713	2.00165	-9.35343	0.147992	0.519412	0.179292	820.208	306.432	0	1.98765	2	bad
GGTAGCACCAC	NZ170	279141	53.0182	12	1.56029	0.14576	2.26079	2.34808	45.7229	0.110044	0.641887	0.121833	762.119	267.41	0	2.25603	2	bad
GGTAGCACCAC	NZ186	2667293	506.608	456	0.275164	0.0381068	1.98619	1.99128	-6.36309	0.468668	0.223363	0.060293	11.0693	4.36718	44	1.9472	2	good
GGTAGCACCAC	NZ250	61327	11.6481	4	1.35922	0.176865	7.64097	7.64978	-3.48306	0.107183	1.05086	-0.0510834	232.061	39.1581	1	5.37436	5	bad
GGTAGGCGAGT	MS157	949249	180.294	149	0.483834	0.115912	1.92107	1.91944	-6.45865	0.279704	0.500543	0.067668	878.362	328.887	2	1.9472	2	bad
GGTAGGCGAGT	MS81	157912	29.9928	15	1.06045	0.20768	3.13153	3.12655	-34.792	0.114054	0.508762	0.0983856	456.05	114.67	8	3.15461	3	bad
GGTAGGCGAGT	NZ169	2237328	424.944	347	0.357733	0.0330269	1.98637	1.976	-13.36	0.208408	0.265567	0.00474046	128.427	49.5643	3	1.99411	2	good
GGTAGGCGAGT	NZ170	1272143	241.623	180	0.398274	0.166126	3.48328	3.4608	-29.2918	0.639365	0.487666	1.08528	208.254	45.0184	9	3.58253	3	bad
GGTAGGCGAGT	NZ186	1903814	361.598	320	0.285621	0.0420146	1.98082	1.96999	-6.86994	0.443016	0.228532	0.0645438	16.7956	6.38645	26	1.9396	2	good
GGTAGGCGAGT	NZ250	27246	5.17493	2	1.24271	0.219437	3.60892	3.46628	32.0747	0.222719	2.24761	0.47396	523.701	266.293	3	1.62697	1	bad
GGTCACGCAAG	MS157	335561	63.7343	51	0.485122	0.189188	2.99966	3.00939	-5.40464	0.393873	0.530915	0.0906715	527.518	137.647	29	2.99506	3	bad
GGTCACGCAAG	MS81	1047658	198.985	173	0.32818	0.0970139	1.96888	1.96515	-10.6435	0.392749	0.289586	0.0530709	193.349	73.6257	4	1.9472	2	good
GGTCACGCAAG	NZ169	1001330	190.186	157	0.350379	0.121013	2.23126	2.23597	-17.9546	0.637744	0.440566	0.618347	320.14	106.98	23	2.24786	2	good
GGTCACGCAAG	NZ170	631982	120.035	12	0.715345	0.156993	10.0896	10.0955	-8.30358	0.389959	1.7661	0.625505	180.952	94.2085	15	5.45641	1	bad
GGTCACGCAAG	NZ186	603776	114.677	101	0.320006	0.0907308	1.82131	1.84172	-7.40874	0.523237	0.355776	0.0719146	221.341	90.0993	21	1.83191	2	good
GGTCACGCAAG	NZ250	1072881	203.776	170	0.420752	0.182427	2.85829	2.87841	-8.27218	0.64784	0.652338	0.017549	494.985	137.159	0	2.85926	3	bad
GTAATCCACCA	MS157	1859675	353.215	305	0.345995	0.0670335	1.94997	1.95405	-8.49929	0.397128	0.292744	0.0738943	166.549	62.8378	0	1.94473	2	good
GTAATCCACCA	MS81	247562	47.0203	19	1.25964	0.0970406	1.96858	1.98801	89.3253	0.117939	0.521498	0.065544	795.507	294.294	21	1.92137	2	bad
GTAATCCACCA	NZ169	71099	13.5041	11	0.648996	0.172248	1.96157	1.96969	-6.37009	0.120354	0.584067	0.20705	865.481	316.237	4	1.96885	2	bad
GTAATCCACCA	NZ170	2371429	450.414	277	0.409922	0.161368	1.51204	1.52019	-9.4738	0.891235	1.17074	0.477442	1531.83	433.411	37	2.21918	0	bad
GTAATCCACCA	NZ186	3064213	581.997	470	0.322326	0.0756704	1.92755	1.95147	-7.8819	0.48504	0.26245	0.0602173	60.1507	23.8571	5	1.92422	2	good
GTAATCCACCA	NZ250	54653	10.3804	6	0.896163	0.204899	7.42784	7.40052	-3.38334	0.289382	1.03785	0.561966	300.751	51.7526	0	5.73447	3	bad
GTACCGGTACA	MS157	790412	150.126	125	0.358642	0.0999175	1.90102	1.93456	-9.39362	0.412483	0.32311	0.0646246	188.405	72.5069	1	1.92574	2	good
GTACCGGTACA	MS81	790172	150.08	120	0.352636	0.0991273	2.01108	2.02121	-15.7057	0.433207	0.315767	0.0653213	291.71	108.518	0	2	2	good
GTACCGGTACA	NZ169	1812878	344.326	285	0.345862	0.175695	4.15994	4.16608	-3.52136	0.854509	0.656167	0.547672	137.75	32.9261	21	3.67939	3	bad
GTACCGGTACA	NZ170	168055	31.9193	6	1.66818	0.13586	2.68897	2.72524	-5.50107	0.112567	0.806204	0.529263	714.021	235.713	3	2.30465	2	bad
GTACCGGTACA	NZ186	1243737	236.227	211	0.29212	0.0555798	1.79035	1.76754	-10.3725	0.58805	0.332904	0.0798244	93.1641	39.6413	9	1.77094	2	good
GTACCGGTACA	NZ250	1490210	283.041	13	1.58601	0.223326	9.70718	9.68577	-18.5783	0.124573	1.66837	0.894566	91.4515	20.824	0	3.77303	3	bad
GTACTACCTTG	MS157	647419	122.967	54	1.08062	0.168375	3.40837	3.42297	-34.689	0.411623	0.504791	0.103789	226.565	53.731	53	3.34625	3	bad
GTACTACCTTG	MS81	852943	162.002	107	0.689037	0.0248293	1.97552	1.99521	22.4531	0.190373	0.308299	0.0652039	287.022	107.277	8	1.96733	2	good
GTACTACCTTG	NZ169	4441879	843.662	572	0.446899	0.226278	5.10977	5.08835	-4.74726	0.764145	0.837393	1.55622	313.675	56.304	4	5.09117	2	bad
GTACTACCTTG	NZ170	2471785	469.475	332	0.404055	0.197216	4.11009	4.08629	-6.3277	0.782828	0.582345	0.857136	193.191	43.1269	64	3.98519	3	bad
GTACTACCTTG	NZ186	3073574	583.775	70	1.3267	0.0776663	1.55009	1.58089	2.64042	0.323701	0.572406	0.172566	1379.77	773.486	2	2.07768	1	bad
GTACTACCTTG	NZ250	739470	140.45	109	0.501547	0.178115	2.04425	2.06505	82.8516	0.453116	0.449715	0.245039	524.1	185.065	14	2.09402	2	bad
GTAGAGAGATT	MS157	1023327	194.364	170	0.327488	0.0468421	1.96223	1.96219	-7.55494	0.389424	0.27769	0.067668	76.3072	29.9573	7	1.9472	2	good
GTAGAGAGATT	MS81	2454980	466.283	411	0.324182	0.126412	1.96373	1.97802	-12.5476	0.431114	0.31129	0.0551423	239.781	91.1809	2	1.96315	2	good
GTAGAGAGATT	NZ169	727014	138.084	9	1.54657	0.173552	3.87401	3.88249	8.5047	0.149295	0.967811	1.07133	317.791	103.5	26	2.52251	2	bad
GTAGAGAGATT	NZ170	191136	36.3031	7	1.69287	0.150912	3.69825	3.71499	-8.34822	0.0751371	0.725115	0.362298	476.777	115.931	19	3.2452	3	bad
GTAGAGAGATT	NZ186	1878117	356.717	318	0.283591	0.0564489	1.97872	1.9745	-7.26451	0.444962	0.226597	0.0604105	5.7381	2.15546	21	1.94625	2	good
GTAGAGAGATT	NZ250	1909660	362.708	270	0.637246	0.197377	2.08912	2.06942	-3.59942	0.476197	1.2648	0.0385136	1071.25	360.311	12	1.89497	2	bad
GTATACCGGCC	MS157	1519169	288.541	225	0.3866	0.0989462	1.84756	1.86387	-8.64734	0.464269	0.346752	0.0683157	205.113	82.4082	0	1.85546	2	good
GTATACCGGCC	MS81	2775042	527.074	403	0.357216	0.0593018	1.91968	1.93183	-11.4486	0.464551	0.309844	0.0534619	233.066	90.5805	1	1.90807	2	good
GTATACCGGCC	NZ169	3053037	579.874	270	1.03226	0.226778	2.3945	2.36825	-15.6896	0.268577	1.46025	0.627826	872.064	350.07	2	1.75043	2	bad
GTATACCGGCC	NZ170	1564173	297.089	229	0.36814	0.0989653	2.19945	2.23826	-11.3304	0.679619	0.427787	0.65417	249.405	85.8289	40	2.22735	2	bad
GTATACCGGCC	NZ186	2226336	422.856	367	0.370145	0.158977	3.36901	3.37878	-6.2652	0.493212	0.423161	0.103878	137.487	35.4055	11	3.40019	4	bad
GTATACCGGCC	NZ250	50680	9.62583	4	1.01955	0.115447	2.83349	2.87521	-4.1061	0.174907	0.928899	0.310465	684.775	244.209	0	2.26135	2	bad
GTATCACTCTA	MS157	1384876	263.034	222	0.355549	0.136059	1.97121	1.96742	-11.0092	0.401254	0.310682	0.0694624	241.419	96.3111	0	1.94986	2	good
GTATCACTCTA	MS81	3926366	745.749	579	0.360926	0.140885	1.90321	1.93292	-20.0574	0.357613	0.296807	0.0533257	234.097	91.4746	0	1.92555	2	good
GTATCACTCTA	NZ169	71742	13.6262	11	0.634928	0.139868	2.01404	2.03927	-7.24724	0.10732	0.52081	0.147548	756.166	276.974	32	2.02944	2	bad
GTATCACTCTA	NZ170	465820	88.4748	10	1.78236	0.110144	2.10821	2.14298	28.0776	0.0333079	0.568496	0.0667211	813.912	295.084	10	2.02013	2	bad
GTATCACTCTA	NZ186	3855264	732.244	261	1.0357	0.210325	5.29273	5.25354	-117.599	0.411551	2.10481	0.14632	405.951	116.844	1	2.95461	4	bad
GTATCACTCTA	NZ250	16302	3.0963	2	1.15421	0.106062	2.34301	2.31677	-192.333	0.034158	1.30833	0.100314	842.956	336.427	10	1.551	2	bad
GTATGCGCTTA	MS157	1193143	226.618	187	0.372126	0.192239	2.39911	2.40531	-15.9341	0.57379	0.405823	0.125504	228.809	68.1512	1	2.40608	2	good
GTATGCGCTTA	MS81	5091894	967.121	900	0.282897	0.0737694	1.98964	1.99643	-9.807	0.438305	0.262829	0.0530709	151.112	58.5829	6	1.9472	2	good
GTATGCGCTTA	NZ169	67877	12.8921	11	0.549199	0.125878	2.02291	2.053	-6.93876	0.120597	0.530793	0.179736	800.062	279.093	16	2.07711	2	bad
GTATGCGCTTA	NZ170	1896619	360.232	15	0.501394	0.0798121	0.847022	0.876039	3.75928	0.729411	0.541119	1.3411	2231.21	2365.87	14	1.47559	0	bad
GTATGCGCTTA	NZ186	147054	27.9305	24	0.427503	0.0785798	1.93706	1.95908	-11.0706	0.219086	0.39207	0.0653403	463.199	174.005	24	1.96733	2	good
GTATGCGCTTA	NZ250	3173662	602.785	429	0.430649	0.0501942	1.97917	1.99484	-15.0522	0.623339	0.438253	0.209352	349.719	126.803	20	2.00532	2	good
GTATTGTGAAC	MS157	1190091	226.038	172	0.418894	0.0403099	1.96469	1.95985	-8.94221	0.33084	0.33492	0.074624	281.066	106.551	8	1.93884	2	good
GTATTGTGAAC	MS81	129070	24.5147	17	0.761037	0.106865	1.99458	2.00245	-24.5226	0.0806725	0.424489	0	602.607	220.221	1	2	2	bad
GTATTGTGAAC	NZ169	55183	10.4811	8	0.667996	0.147228	6.05509	6.1179	-5.5798	0.106745	0.598566	0.464196	316.226	46.8621	11	6.03324	6	bad
GTATTGTGAAC	NZ170	2293934	435.695	17	0.495856	0.0493952	1.00048	0.98566	2.44869	0.771723	0.810506	0.283192	1972.65	2029.91	35	1.45774	0	bad
GTATTGTGAAC	NZ186	2827828	537.099	485	0.279625	0.118159	1.97252	1.97582	-8.69337	0.49824	0.260654	0.061146	59.2576	22.2623	9	1.95005	2	good
GTATTGTGAAC	NZ250	1557909	295.899	9	1.60338	0.15294	15.0874	15.0497	-8.25538	0.112815	2.14802	-0.777224	91.7675	20.639	22	5.52479	2	bad
GTCAGGATTCC	MS157	1696943	322.306	52	0.999895	0.149193	4.45588	4.42184	-7.99248	0.454218	3.09972	0.150338	390	161.042	2	1.62127	0	bad
GTCAGGATTCC	MS81	200459	38.0739	20	1.03374	0.111814	1.96127	1.98484	-69.0069	0.0982777	0.434488	0.0652039	593.582	219.33	2	1.96733	2	bad
GTCAGGATTCC	NZ169	80716	15.3307	11	0.750582	0.129915	2.1775	2.16731	-7.91204	0.0828233	0.550772	0.268846	738.608	255.221	5	2.1472	2	bad
GTCAGGATTCC	NZ170	2065738	392.353	290	0.384537	0.203434	2.14146	2.12885	-8.49284	0.737517	0.584326	0.741926	372.575	141.922	8	2.16638	2	good
GTCAGGATTCC	NZ186	156997	29.819	25	0.456607	0.0816679	1.94477	1.94009	-12.6202	0.169274	0.386855	0.060293	503.172	188.023	2	1.9472	2	bad
GTCAGGATTCC	NZ250	58976	11.2015	2	1.08139	0.135695	5.61773	5.60458	86.0785	0.281888	1.62636	-0.0942841	580.589	300.319	31	3.00399	1	bad
GTCATACTACT	MS157	1012943	192.392	156	0.344675	0.142493	4.64029	4.64119	-6.14222	0.724823	0.46397	0.235452	53.9304	9.14835	3	4.49915	4	bad
GTCATACTACT	MS81	214292	40.7012	14	1.37196	0.147725	2.11253	2.15621	-188.673	0.130156	0.532953	0.0059819	688.748	241.082	0	2.13029	2	bad
GTCATACTACT	NZ169	3501819	665.113	23	0.590231	0.0470376	1.72743	1.72873	3.17998	0.686908	1.10921	0.749192	1124.37	1307.73	4	1.50275	0	bad
GTCATACTACT	NZ170	828270	157.316	12	1.5591	0.168355	2.70248	2.71195	18.3407	0.164022	1.17421	0.364605	542.407	257.639	3	1.48794	1	bad
GTCATACTACT	NZ186	1824960	346.621	270	0.388124	0.160611	2.67099	2.65015	-8.03013	0.47861	0.386807	0.052123	175.534	54.5194	6	2.67806	3	bad
GTCATACTACT	NZ250	44095	8.37512	4	1.13886	0.146075	5.72537	5.66793	-3.21277	0.162364	0.865045	0.260063	338.184	62.494	11	4.61083	5	bad
GTCCACTGGTG	MS157	99538	18.9056	2	1.58597	0.105129	14.0661	14.1158	143.531	0.0260005	2.53919	0.398399	164.41	21.3874	3	6.02298	8	bad
GTCCACTGGTG	MS81	81131	15.4095	7	1.29054	0.134846	2.09509	2.09041	-6.14903	0.0596784	0.631059	0.012133	883.432	314.379	0	2.02013	2	bad
GTCCACTGGTG	NZ169	23708	4.50294	4	0.824911	0.179652	2.10033	2.08137	-4.26978	0.0673263	0.811226	0.230619	969.773	336.903	9	2.04008	2	bad
GTCCACTGGTG	NZ170	152194	28.9067	4	1.79837	0.15998	2.72664	2.76546	-3.35519	0.0675136	0.875073	0.203254	792.73	264.632	17	2.15062	2	bad
GTCCACTGGTG	NZ186	993839	188.763	163	0.301095	0.115225	1.95566	1.95796	-9.40876	0.412411	0.251433	0.0607395	34.5472	13.5593	4	1.95176	2	good
GTCCACTGGTG	NZ250	6965	1.32289	0	1.49978	0.0138962	2.936	2.93228	11.1459	0.0446899	0.766354	0.0737697	453.557	148.832	31	2.09212	2	bad
GTCCTTCAGCG	MS157	1992532	378.449	334	0.328449	0.189153	5.09031	5.08826	-6.51822	0.674679	0.390987	0.290715	44.751	8.2047	0	4.94245	5	bad
GTCCTTCAGCG	MS81	4646465	882.519	712	0.3439	0.124155	2.15688	2.14895	-32.7593	0.562203	0.360577	0.0809397	277.977	94.0635	2	2.14226	2	good
GTCCTTCAGCG	NZ169	3372203	640.494	502	0.383322	0.179989	4.94322	4.97526	-3.43217	0.802613	0.570483	-0.134049	144.733	41.4577	26	4.34606	4	bad
GTCCTTCAGCG	NZ170	1700187	322.923	259	0.384905	0.185508	3.35888	3.37116	-13.4877	0.467116	0.383045	0.0661978	159.936	37.2068	6	3.36334	3	bad
GTCCTTCAGCG	NZ186	2254231	428.154	339	0.354756	0.0420047	1.96988	1.96237	-8.40314	0.39124	0.276312	0.0646098	71.9544	27.5298	1	1.94131	2	good
GTCCTTCAGCG	NZ250	3465577	658.229	505	0.395305	0.232974	4.60158	4.57666	-10.4919	0.730215	0.615458	0.557546	238.213	43.1156	3	4.63077	5	bad
GTCGACAAGGT	MS157	1411589	268.108	237	0.321373	0.122504	1.90061	1.90802	-6.1486	0.581731	0.304425	0.0644892	172.272	67.65	1	1.85318	2	good
GTCGACAAGGT	MS81	165841	31.4988	14	1.19299	0.177766	3.18211	3.18364	-44.6587	0.0768463	0.509006	0.0693133	465.696	117.22	2	3.10161	3	bad
GTCGACAAGGT	NZ169	2740176	520.451	448	0.361408	0.227492	4.76285	4.77714	-6.30835	0.786391	0.481673	0.870368	146.195	27.9467	1	4.55233	5	bad
GTCGACAAGGT	NZ170	1428586	271.336	205	0.378785	0.144696	2.35372	2.38117	-19.7209	0.649812	0.440721	0.698175	217.737	67.2293	2	2.41007	2	good
GTCGACAAGGT	NZ186	1902020	361.257	297	0.319984	0.0525317	1.86127	1.84634	-9.00841	0.57853	0.309797	0.0723604	75.3349	30.2887	15	1.82849	2	good
GTCGACAAGGT	NZ250	39427	7.48851	3	1.00799	0.103045	2.86394	2.87762	-15.1176	0.342297	1.53455	0.0718894	733.005	302.204	0	2.20589	2	bad
GTCGGTCTAGG	MS157	369042	70.0934	1	1.72978	0.233563	13.8741	13.9424	13.1736	0.0851314	3.41221	0.238593	151.653	41.5102	1	3.76809	1	bad
GTCGGTCTAGG	MS81	49190	9.34283	3	1.56107	0.122612	6.76201	6.73918	-11.1265	0.0428842	1.20133	0.167383	289.502	42.1793	2	6.0019	5	bad
GTCGGTCTAGG	NZ169	11896	2.25945	2	1.13526	0.152267	3.71674	3.77507	-127.1	0.0774734	1.41734	0.409432	679.316	161.212	6	3.06401	4	bad
GTCGGTCTAGG	NZ170	307164	58.3407	37	0.446752	0.0987327	1.83695	1.84083	-3.96958	0.718048	1.38691	0.455049	1253.91	323.084	42	2.03856	3	bad
GTCGGTCTAGG	NZ186	445186	84.5557	4	1.22373	0.207744	1.82471	1.76621	-10.1501	0.274575	1.17144	0.288604	1326.64	1229.4	6	1.31301	0	bad
GTCGGTCTAGG	NZ250	1664	0.316049	0	1.75601	4.44089e-16	2	2	2.83077	0.022101	4.16445e-15	0	146.88	43.1954	30	2	2	bad
GTCTCGGACGT	MS157	2732225	518.941	16	0.807702	0.0647379	3.36726	3.31864	30.5159	0.56957	1.3731	0.0726639	291.773	246.959	5	1.77436	0	bad
GTCTCGGACGT	MS81	163800	31.1111	20	0.830586	0.0553172	1.937	1.96191	-32.4455	0.0801239	0.398134	0.0652039	528.552	198.958	9	1.96733	2	good
GTCTCGGACGT	NZ169	65544	12.449	11	0.527096	0.0938112	1.9299	1.96219	-6.18373	0.0758305	0.50065	0.198703	795.735	295.15	3	1.95897	2	bad
GTCTCGGACGT	NZ170	2050924	389.539	286	0.383311	0.113074	1.90517	1.81162	-2.56605	0.911956	0.747439	0.465155	362.16	157.432	16	1.41538	1	good
GTCTCGGACGT	NZ186	2699315	512.69	443	0.343442	0.15454	1.77143	1.76656	-4.83445	0.619472	0.440638	0.0811119	329.686	138.588	4	1.76258	2	good
GTCTCGGACGT	NZ250	3617175	687.023	547	0.34644	0.0864871	2.00914	2.02796	-16.4876	0.62363	0.327329	0.198558	120.886	44.945	0	2.05337	2	good
GTCTGAGAACA	MS157	806024	153.091	136	0.328372	0.0884891	1.94122	1.94382	-7.08442	0.52181	0.31188	0.071923	166.793	66.8241	3	1.9189	2	good
GTCTGAGAACA	MS81	136577	25.9406	12	1.14642	0.0984702	2.01897	2.02228	-27.929	0.066926	0.534527	0.0774223	703.636	251.988	3	1.98101	2	bad
GTCTGAGAACA	NZ169	2408781	457.508	374	0.338568	0.12399	2.19711	2.20797	-31.761	0.648174	0.424698	0.67497	220.532	74.7659	23	2.25508	2	good
GTCTGAGAACA	NZ170	1143760	217.238	143	0.44307	0.144032	1.8912	1.90448	-4.47864	0.776079	0.721512	0.487348	617.206	245.649	17	1.76467	1	good
GTCTGAGAACA	NZ186	1848761	351.142	48	1.01192	0.176308	13.4755	13.4991	69.2591	0.455313	2.12628	0.750751	122.744	32.9587	49	6.02146	1	bad
GTCTGAGAACA	NZ250	19159	3.63894	2	0.839814	0.0981957	1.91599	1.96877	-10.6226	0.0526278	1.07136	0.0460937	1150.23	406.289	17	1.91548	2	bad
GTGACTAGCCT	MS157	1097216	208.398	142	0.751877	0.177338	2.26556	2.25172	-3.0884	0.348226	1.13562	0.137013	993.864	326.82	24	2.17816	2	bad
GTGACTAGCCT	MS81	4342086	824.708	684	0.335224	0.103139	1.96715	1.99384	-12.6777	0.494996	0.309958	0.0540775	225.22	85.4783	29	1.97949	2	good
GTGACTAGCCT	NZ169	68059	12.9267	9	0.810121	0.173886	1.98554	2.03434	-7.38767	0.0654684	0.567862	0.185153	878.278	325.24	62	1.97987	2	bad
GTGACTAGCCT	NZ170	1683549	319.762	182	0.445445	0.116695	1.71216	1.74454	-19.4158	0.840019	1.75915	0.202164	1323.26	378.975	25	1.56334	0	bad
GTGACTAGCCT	NZ186	2798110	531.455	23	1.59709	0.0777796	1.53032	1.54582	2.8652	0.208185	0.482405	3.10141	1373.63	735.229	2	2.64976	1	bad
GTGACTAGCCT	NZ250	53415	10.1453	3	1.50063	0.231133	2.4248	2.45135	-7.84818	0.133877	1.28306	0.0754784	925.93	324.403	52	1.97075	2	bad
GTGCGTACTAT	MS157	759744	144.301	127	0.322236	0.0414316	1.96453	1.9666	-8.08737	0.401398	0.280453	0.0677441	122.507	47.2954	32	1.94625	2	good
GTGCGTACTAT	MS81	1915655	363.847	282	0.345563	0.0952517	1.97866	1.98585	-14.5968	0.391236	0.291949	0.0536326	248.448	94.9183	1	1.95252	2	good
GTGCGTACTAT	NZ169	48036	9.12365	6	0.965443	0.0758196	2.14028	2.10057	-3.9909	0.0774948	0.650271	0.145908	783.542	279.259	6	2.03153	2	bad
GTGCGTACTAT	NZ170	1071391	203.493	157	0.367079	0.108608	2.35235	2.36922	-19.7208	0.656117	0.437996	0.735431	280.159	89.0689	78	2.40418	2	good
GTGCGTACTAT	NZ186	1525491	289.742	251	0.337583	0.148453	4.55509	4.52958	-6.46278	0.613939	0.418193	0.139065	58.3272	13.2667	3	4.49155	4	bad
GTGCGTACTAT	NZ250	24776	4.70579	2	1.39086	0.12474	5.04351	5.08862	-221.265	0.140616	1.73389	0.556291	509.782	116.93	5	3.48737	1	bad
GTGGCCTACAC	MS157	1168391	221.917	142	0.538156	0.170978	3.02861	3.01099	-4.91688	0.616831	0.880212	0.0296473	622.978	162.786	10	2.9189	2	bad
GTGGCCTACAC	MS81	4632518	879.87	736	0.321011	0.113439	1.96994	1.99586	-12.7238	0.505562	0.300623	0.0554118	218.211	80.9476	5	1.96296	2	good
GTGGCCTACAC	NZ169	2335321	443.556	345	0.345079	0.0939279	2.19009	2.21448	-25.1426	0.687661	0.395242	0.686114	192.996	62.5161	3	2.25869	2	good
GTGGCCTACAC	NZ170	1039779	197.489	21	1.05985	0.0771935	5.57706	5.60056	5.63978	0.316905	0.953707	3.50211	298.717	145.626	28	5.26496	1	bad
GTGGCCTACAC	NZ186	1218907	231.511	31	1.60887	0.137322	2.17471	2.17213	4.14051	0.126098	0.514708	0.0946606	617.656	227.695	7	2.04046	2	bad
GTGGCCTACAC	NZ250	149799	28.4519	5	1.67273	0.135258	6.40657	6.40564	-3.6059	0.147322	0.900177	0.395685	278.183	49.684	21	4.90636	6	bad
GTGGTGCAGGA	MS157	883829	167.869	151	0.309853	0.0799042	1.96165	1.96744	-9.0152	0.397063	0.283816	0.0701543	124.527	49.7501	0	1.95594	2	good
GTGGTGCAGGA	MS81	98012	18.6158	8	1.24106	0.0966953	2.05952	2.05006	-9.83544	0.0651009	0.623373	0.0652039	779.024	282.874	13	1.96733	2	bad
GTGGTGCAGGA	NZ169	26915	5.11206	4	0.793127	0.188249	5.56501	5.59509	-3.56081	0.080102	0.743807	0.653035	332.608	55.6263	26	5.17151	5	bad
GTGGTGCAGGA	NZ170	1141840	216.874	20	0.44916	0.0730006	2.78089	2.76476	-15.8119	0.734042	2.48742	1.01976	463.139	229.614	2	1.47863	0	bad
GTGGTGCAGGA	NZ186	1639431	311.383	254	0.33843	0.0539791	1.98059	1.98279	-8.06215	0.387996	0.261875	0.060293	61.4262	24.2861	2	1.9472	2	good
GTGGTGCAGGA	NZ250	28015	5.32099	4	1.05301	0.114406	2.14766	2.13163	-5.36561	0.0591813	0.920774	0.0600289	948.007	332.055	47	1.99924	2	bad
GTGGTTGTCTC	MS157	1701475	323.167	260	0.405714	0.151747	2.16646	2.19488	-13.0704	0.475492	0.443386	0.0995816	453.592	157.016	0	2.215	2	good
GTGGTTGTCTC	MS81	6488710	1232.42	1031	0.350709	0.177228	3.16075	3.15649	-2.54927	0.89407	0.621637	0.0349694	90.5891	27.9259	0	2.53637	2	bad
GTGGTTGTCTC	NZ169	86014	16.3369	13	0.586033	0.155066	3.27078	3.27851	-11.7109	0.125979	0.50287	0.194282	491.28	118.559	18	3.22089	3	bad
GTGGTTGTCTC	NZ170	275207	52.271	16	1.43896	0.174866	5.87817	5.90036	22.7259	0.0923459	0.526311	0.604259	232.129	34.8433	4	5.74663	6	bad
GTGGTTGTCTC	NZ186	334148	63.4659	29	0.908783	0.144013	2.14918	2.15659	15.3736	0.337839	0.510123	0.0667298	674.281	233.705	0	2.20494	2	bad
GTGGTTGTCTC	NZ250	4421440	839.78	677	0.338063	0.0380849	2.01424	2.0257	-17.1941	0.62673	0.300838	0.198621	118.509	45.0049	1	2.05337	2	good
GTGTCGCCTTC	MS157	1101750	209.259	181	0.333684	0.0537464	1.91826	1.938	-7.03896	0.475674	0.304599	0.0737387	148.56	57.9248	4	1.91282	2	good
GTGTCGCCTTC	MS81	3947561	749.774	638	0.290299	0.109188	1.98934	2.00478	-8.85848	0.487463	0.243157	0.0537348	67.0871	25.3226	0	1.94834	2	good
GTGTCGCCTTC	NZ169	1240096	235.536	23	1.11006	0.106797	2.85954	2.8918	4.84951	0.226644	0.569478	34.2574	752.762	385.808	5	4.9755	1	bad
GTGTCGCCTTC	NZ170	1103384	209.57	158	0.381336	0.194579	2.24024	2.25035	-11.9003	0.661279	0.428824	0.567732	369.652	124.621	8	2.24482	2	good
GTGTCGCCTTC	NZ186	1936098	367.73	296	0.364783	0.143559	3.50534	3.5225	-5.55939	0.620382	0.358467	0.13099	37.0234	10.159	35	3.41538	4	bad
GTGTCGCCTTC	NZ250	2539767	482.387	377	0.374181	0.0759162	1.93151	1.9552	-17.093	0.658096	0.436778	0.196973	293.407	111.53	0	1.9679	2	good
GTGTGGATATG	MS157	1108359	210.515	52	0.911659	0.161518	5.24967	5.23097	-5.81127	0.335603	2.87684	-0.131316	328.463	169.119	3	2.04501	0	bad
GTGTGGATATG	MS81	3290007	624.883	513	0.326093	0.143505	3.70249	3.70937	-15.6896	0.512802	0.313987	0.108138	68.3795	14.1808	19	3.7018	4	bad
GTGTGGATATG	NZ169	746910	141.863	11	1.64563	0.146347	3.56331	3.59293	6.42516	0.131333	0.995973	0.421029	350.097	117.968	29	2.26306	2	bad
GTGTGGATATG	NZ170	1337390	254.015	145	0.5031	0.162172	1.69561	1.71401	-9.44036	0.737504	0.908621	0.228404	1041.23	465.696	2	1.71244	1	bad
GTGTGGATATG	NZ186	1993592	378.65	335	0.289269	0.0411616	1.97042	1.96963	-7.3224	0.443724	0.231963	0.060293	9.734	3.77604	12	1.9472	2	good
GTGTGGATATG	NZ250	40810	7.75119	2	1.25562	0.171908	2.73759	2.74794	-29.015	0.143651	1.64354	0.0624403	860.935	334.185	0	1.86477	2	bad
GTGTTCTTGCA	MS157	1449202	275.252	225	0.342961	0.0854096	1.64872	1.63047	-7.35769	0.662575	0.438103	0.0390788	285.854	127.504	7	1.62165	2	good
GTGTTCTTGCA	MS81	5403597	1026.32	770	0.41021	0.150584	5.99739	5.99615	-17.1691	0.537324	0.485946	0.254119	202.134	30.3716	5	5.92061	6	bad
GTGTTCTTGCA	NZ169	85471	16.2338	11	0.742837	0.157571	2.12788	2.14862	-9.93439	0.137306	0.541391	0.61152	737.573	255.361	53	2.16885	2	bad
GTGTTCTTGCA	NZ170	1633034	310.168	251	0.35932	0.138087	5.80228	5.82588	-15.0972	0.671895	0.500231	1.36268	148.324	21.7957	46	5.9151	6	bad
GTGTTCTTGCA	NZ186	2261281	429.493	358	0.332354	0.195414	3.31315	3.33337	-13.4018	0.690254	0.420819	0.107871	82.6473	19.6164	24	3.34302	3	good
GTGTTCTTGCA	NZ250	2550683	484.46	379	0.466171	0.149874	5.21779	5.21218	-16.0391	0.573354	0.617562	0.410896	237.077	38.2198	0	5.19202	5	bad
GTTAGCCATTC	MS157	62733	11.9151	4	1.40904	0.121143	2.21137	2.21666	-3.4673	0.0436696	0.758782	0.0682754	865.845	313.491	2	1.97094	2	bad
GTTAGCCATTC	MS81	120007	22.7934	11	1.15393	0.0904163	1.95721	1.97666	-14.2294	0.0413172	0.516161	0.0530709	830.497	309.316	40	1.9472	2	bad
GTTAGCCATTC	NZ169	448479	85.1812	12	1.46358	0.147398	2.36162	2.36462	-159.575	0.234633	1.10815	1.05028	760.423	332.165	2	1.64938	1	bad
GTTAGCCATTC	NZ170	1522200	289.117	239	0.352808	0.105789	2.11092	2.11876	-17.3055	0.659285	0.460952	0.558489	313.743	107.301	13	2.1584	2	good
GTTAGCCATTC	NZ186	102367	19.4429	17	0.473268	0.146571	1.93599	1.92714	-9.43502	0.121793	0.443505	0.0615015	642.18	238.148	12	1.94207	2	bad
GTTAGCCATTC	NZ250	5192	0.986135	0	1.80277	4.44089e-16	2	2	2.06251	0.013459	6.40685e-15	0	0	0	6	2	2	bad
GTTATGGCTGT	MS157	823814	156.47	32	0.756454	0.162335	9.63543	9.62979	-6.35358	0.518565	3.12083	0.0363533	156.091	44.8621	4	4.21937	0	bad
GTTATGGCTGT	MS81	176140	33.4549	11	1.44792	0.092607	2.01592	2.03523	-22.4469	0.0530854	0.557669	0.0652039	793.694	282.822	2	1.96733	2	bad
GTTATGGCTGT	NZ169	1934829	367.489	23	1.33735	0.202483	7.28039	7.26694	-173.589	0.240091	1.89591	4.45187	193.067	76.9516	7	3.16904	1	bad
GTTATGGCTGT	NZ170	1224411	232.557	180	0.384701	0.086038	2.43143	2.44147	-13.4258	0.597143	0.428157	0.72988	267.135	81.4068	8	2.44539	2	good
GTTATGGCTGT	NZ186	893796	169.762	15	1.57255	0.126186	2.85746	2.86631	4.59478	0.230293	0.665802	0.532647	650.465	225.243	2	2.88547	2	bad
GTTATGGCTGT	NZ250	27625	5.24691	2	1.49307	0.176115	9.37801	9.42626	-355.619	0.134501	1.8682	0.534561	248.996	37.7819	6	5.8207	4	bad
GTTCACGTCTA	MS157	1181753	224.455	171	0.367605	0.11811	1.9477	1.95687	-8.45436	0.425992	0.282185	0.0714035	81.7663	31.6359	0	1.94891	2	good
GTTCACGTCTA	MS81	147402	27.9966	18	0.844534	0.0880438	1.99335	2.01706	-20.7176	0.0986278	0.443612	0.0661233	630.345	228.223	3	2.01254	2	bad
GTTCACGTCTA	NZ169	54125	10.2802	8	0.679464	0.160511	2.15512	2.17848	-5.61777	0.114857	0.598938	0.210111	810.544	278.281	2	2.09402	2	bad
GTTCACGTCTA	NZ170	1705952	324.017	13	0.619506	0.0614924	1.28234	1.28282	3.56745	0.58137	0.843796	0.0570292	1791.22	1982.36	26	1.47863	0	bad
GTTCACGTCTA	NZ186	2147705	407.921	340	0.371561	0.21054	3.58513	3.61422	-4.44878	0.60036	0.487043	0.169334	217.441	54.416	2	3.4604	3	bad
GTTCACGTCTA	NZ250	2025655	384.74	313	0.37053	0.142437	1.87339	1.87712	-5.77331	0.587652	0.436619	0.223075	369.64	168.625	18	1.82545	2	good
GTTCCACAAGA	MS157	637997	121.177	104	0.338506	0.0467644	1.94917	1.95394	-8.1194	0.376385	0.291342	0.067668	129.14	50.5166	0	1.9472	2	good
GTTCCACAAGA	MS81	109740	20.8433	9	1.24342	0.107308	3.12716	3.14087	-8.78131	0.0827492	0.59039	0.0708476	577.407	150.614	4	3.02659	3	bad
GTTCCACAAGA	NZ169	504996	95.9157	11	1.20392	0.17269	6.07315	6.09771	-7.56216	0.202711	1.57326	0.420757	305.306	78.2613	16	3.30864	2	bad
GTTCCACAAGA	NZ170	919939	174.727	101	0.589278	0.181437	5.38572	5.40097	-7.53452	0.589207	1.2086	0.953879	444.585	89.5381	1	5.31282	2	bad
GTTCCACAAGA	NZ186	1453378	276.045	211	0.365901	0.0937439	1.57954	1.53521	-4.75996	0.772657	0.517383	0.0803507	373.826	169.384	6	1.4547	2	good
GTTCCACAAGA	NZ250	13990	2.65717	1	1.20672	0.0654696	4.36839	4.3744	36.2132	0.211223	1.72545	0.052269	451.849	150.663	12	2.63495	1	bad
GTTCTCACCGG	MS157	483974	91.9229	81	0.333355	0.0629779	1.96138	1.95655	-8.74363	0.374235	0.306883	0.067668	146.613	56.2828	0	1.9472	2	good
GTTCTCACCGG	MS81	1947506	369.897	288	0.344757	0.136679	1.97484	2.00573	-11.4046	0.453094	0.308372	0.064728	273.743	102.895	8	1.96562	2	good
GTTCTCACCGG	NZ169	1518100	288.338	220	0.387419	0.062722	1.86141	1.87266	-8.28226	0.551874	0.329204	0.0330271	224.372	91.4235	0	1.86344	2	good
GTTCTCACCGG	NZ170	616230	117.043	89	0.39663	0.104513	2.36117	2.34619	-17.4521	0.614091	0.457114	0.673799	322.716	101.091	1	2.3812	2	good
GTTCTCACCGG	NZ186	875735	166.331	131	0.354297	0.100467	1.63183	1.61276	-3.84756	0.775917	0.516383	0.066279	331.585	156.421	0	1.46325	2	good
GTTCTCACCGG	NZ250	11201	2.12745	1	1.22953	0.0655267	4.35879	4.38067	36.3528	0.0918886	1.42541	0.144911	509.414	129.434	16	2.78234	2	bad
GTTCTCGGTAC	MS157	1453028	275.979	239	0.310501	0.0403407	1.97233	1.96531	-7.4915	0.44494	0.25298	0.067668	30.4946	11.764	23	1.9472	2	good
GTTCTCGGTAC	MS81	2393160	454.541	405	0.298814	0.128671	1.97772	1.98765	-10.7638	0.506081	0.289926	0.0537254	171.22	65.1387	5	1.95632	2	good
GTTCTCGGTAC	NZ169	3283892	623.721	494	0.357909	0.14862	3.83744	3.8416	-3.4995	0.893865	0.616048	0.588493	120.507	29.9613	0	3.44406	4	bad
GTTCTCGGTAC	NZ170	854582	162.314	12	1.09378	0.143141	1.08313	1.07967	6.2597	0.412528	0.72749	0.769682	2022.41	2057.13	2	1.36448	0	bad
GTTCTCGGTAC	NZ186	2332415	443.004	344	0.349913	0.178085	2.77596	2.80766	-3.49191	0.844423	0.597149	0.0858236	252.534	81.0167	20	2.49174	2	bad
GTTCTCGGTAC	NZ250	2541274	482.673	342	0.46099	0.127147	2.77593	2.75854	-4.43725	0.65197	0.578843	0.39371	433.692	140.906	18	2.58272	2	bad
GTTCTGGAATG	MS157	1561675	296.614	7	1.55755	0.0895791	7.68645	7.67913	-7.51197	0.172441	1.79358	0.690374	228.4	116.031	8	3.17569	1	bad
GTTCTGGAATG	MS81	2751950	522.688	464	0.302148	0.123234	1.98726	2.0005	-9.18804	0.499059	0.278522	0.0542119	139.191	53.3937	9	1.95651	2	good
GTTCTGGAATG	NZ169	54867	10.4211	9	0.597955	0.0790781	2.03912	2.03558	-5.57346	0.0855101	0.546465	0.0924984	784.171	278.06	16	2.04084	2	bad
GTTCTGGAATG	NZ170	752993	143.019	17	1.54608	0.151458	7.55785	7.58492	24.2635	0.108047	1.31962	1.04305	183.802	37.5088	18	4.14283	3	bad
GTTCTGGAATG	NZ186	2524688	479.523	421	0.281536	0.0840911	1.97645	1.95852	-6.90433	0.48626	0.23271	0.0571048	26.6559	10.6607	2	1.93105	2	good
GTTCTGGAATG	NZ250	44723	8.4944	4	1.19451	0.210005	3.72118	3.70796	-4.09071	0.129261	0.969185	0.113371	487.283	124.507	2	3.03115	3	bad
GTTGCAACTAG	MS157	1620963	307.875	267	0.323957	0.118925	1.89046	1.922	-11.479	0.414912	0.288575	0.0142549	197.861	79.245	14	1.92308	2	good
GTTGCAACTAG	MS81	173923	33.0338	14	1.25769	0.157129	2.16917	2.24097	-68.7111	0.0907776	0.60735	0.0213111	781.431	272.204	4	2.14796	2	bad
GTTGCAACTAG	NZ169	2765808	525.32	103	1.24231	0.134369	7.89277	7.87759	-72.5206	0.30034	2.16654	1.47368	237.54	75.3934	19	3.87009	1	bad
GTTGCAACTAG	NZ170	2113194	401.366	12	0.549976	0.0661043	1.55557	1.56826	4.40907	0.65782	0.702741	0.285447	1240.95	1311.43	17	2.18898	0	bad
GTTGCAACTAG	NZ186	2532965	481.095	410	0.294902	0.11035	1.67567	1.66644	-7.33192	0.778255	0.416365	0.05045	181.428	83.021	37	1.62621	2	good
GTTGCAACTAG	NZ250	3691164	701.076	20	0.655266	0.0413875	5.4807	5.47914	-18.879	0.600531	2.6252	0.0318418	146.08	123.96	2	2.05812	0	bad
GTTGCGTCACT	MS157	1449913	275.387	243	0.330657	0.158163	1.70036	1.7266	-4.87038	0.735217	0.408666	0.110952	344.058	155.849	4	1.59373	2	good
GTTGCGTCACT	MS81	143104	27.1802	14	1.07041	0.121376	1.98783	1.99933	-34.8662	0.120161	0.511437	0.0756993	787.412	287.851	5	2.06648	2	bad
GTTGCGTCACT	NZ169	49060	9.31814	7	0.657338	0.148813	2.13229	2.14713	-5.2906	0.11587	0.626995	0.0799736	883.63	301.879	3	2.11092	2	bad
GTTGCGTCACT	NZ170	1565399	297.322	229	0.390221	0.193239	4.8542	4.85182	-7.21366	0.614064	0.38435	-0.00682551	52.0146	9.43529	24	4.74074	5	bad
GTTGCGTCACT	NZ186	2166815	411.551	333	0.461504	0.18722	5.94142	5.97102	-4.31504	0.554052	0.575031	0.305299	232.659	38.451	12	5.67179	5	bad
GTTGCGTCACT	NZ250	3138114	596.033	494	0.345747	0.0841328	1.91844	1.92802	-13.2219	0.669668	0.417727	0.21613	232.581	88.0873	2	1.94986	2	good
GTTGTACACTT	MS157	1188076	225.655	111	0.851159	0.141253	3.16492	3.15311	-4.37172	0.397879	1.74876	0.159652	675.71	239.144	20	2.2207	2	bad
GTTGTACACTT	MS81	2815758	534.807	468	0.301697	0.0907389	1.97379	1.96937	-11.7924	0.409131	0.267734	0.0530709	120.684	46.8592	3	1.9472	2	good
GTTGTACACTT	NZ169	1843300	350.104	12	1.01133	0.0731789	0.966842	0.975312	5.59322	0.231586	0.651749	0.523602	2021.38	2094.44	2	1.42336	0	bad
GTTGTACACTT	NZ170	1456764	276.688	219	0.359124	0.129294	2.01166	2.02983	-11.2431	0.720488	0.46874	0.632353	349.439	132.367	61	2.05679	2	good
GTTGTACACTT	NZ186	1347913	256.014	21	1.30311	0.0994274	3.08682	3.16336	2.58026	0.352264	0.699804	0.420192	754.83	405.365	12	3.91377	1	bad
GTTGTACACTT	NZ250	18557	3.5246	0	1.64132	0.10038	10.4188	10.3786	22.9213	0.0544577	1.48523	1.24934	124.713	20.4503	7	5.59183	4	bad
TAACCGTATTG	MS157	288226	54.7438	0	1.65476	0.0167944	4.43901	4.45091	9.33778	0.0634536	2.10984	2.08856	0	0	11	1.46914	0	bad
TAACCGTATTG	MS81	95615	18.1605	4	1.57198	0.156648	3.93294	3.9493	-4.401	0.0869539	0.849965	0.0665482	439.68	114.537	8	3.05527	3	bad
TAACCGTATTG	NZ169	98142	18.6405	3	1.41586	0.126131	9.02486	9.03514	-16.0545	0.101071	1.82565	1.34886	231.853	45.0379	8	5.4207	3	bad
TAACCGTATTG	NZ170	432199	82.0891	5	1.35044	0.203468	12.4645	12.4749	-12.4822	0.179625	2.52106	4.73215	119.106	35.4238	14	5.07711	2	bad
TAACCGTATTG	NZ186	27856	5.29079	4	0.83027	0.0917892	2.13181	2.17094	-3.22891	0.0677554	0.732101	0.0653403	930.504	340.821	4	1.96733	2	bad
TAACCGTATTG	NZ250	5052	0.959544	0	1.57957	4.88498e-15	2	2	1.97666	0.148185	1.24934e-14	0	0.598162	0.211342	16	2	2	bad
TAACTACCAGA	MS157	1406545	267.15	236	0.317711	0.112584	1.99244	1.98103	-6.60108	0.510126	0.285767	0.0714035	92.7707	35.5687	0	1.94891	2	good
TAACTACCAGA	MS81	2073440	393.816	325	0.305142	0.101441	1.97337	1.98714	-10.9181	0.432934	0.241234	0.0536506	55.4965	20.9878	10	1.95328	2	good
TAACTACCAGA	NZ169	55516	10.5443	8	0.678201	0.0894172	1.99663	2.01318	-5.75159	0.0554918	0.558416	0.0731815	849.967	299.748	0	2.02013	2	bad
TAACTACCAGA	NZ170	522397	99.2207	12	1.61986	0.0647408	4.77109	4.75969	6.08707	0.133784	0.779368	0.95812	351.406	83.8016	0	4.03875	3	bad
TAACTACCAGA	NZ186	2818434	535.315	479	0.337648	0.196431	4.74734	4.73284	-6.57065	0.664704	0.42869	0.233775	113.881	20.9785	0	4.5981	5	bad
TAACTACCAGA	NZ250	31715	6.02374	4	1.08668	0.101035	2.20588	2.25725	-3.36808	0.0534762	0.822986	0.0379007	1065.92	381.636	0	1.95973	2	bad
TAAGACGCATC	MS157	1240321	235.579	217	0.300372	0.0668671	1.90615	1.93537	-9.67922	0.44384	0.295326	0.0622135	174.906	68.1324	11	1.91491	2	good
TAAGACGCATC	MS81	71954	13.6665	11	0.648456	0.13951	2.00705	2.02678	-7.89999	0.0802254	0.576358	0.0652039	863.122	305.207	3	1.96733	2	bad
TAAGACGCATC	NZ169	52769	10.0226	8	0.737478	0.155686	2.22654	2.21977	-5.1296	0.0860092	0.638754	0.207515	877.257	289.692	1	2.13485	2	bad
TAAGACGCATC	NZ170	1862978	353.842	269	0.36628	0.0715121	2.37737	2.36962	-19.0728	0.680618	0.425767	0.664929	199.77	63.4898	5	2.38348	2	good
TAAGACGCATC	NZ186	2411264	457.98	62	1.36789	0.155044	8.91102	8.89867	8.40762	0.303078	1.30942	0.222573	169.178	44.1234	7	4.84672	2	bad
TAAGACGCATC	NZ250	3577016	679.395	421	0.491415	0.114914	7.07472	7.12173	-12.0942	0.713219	1.73701	0.212905	289.587	43.53	24	4.33371	0	bad
TACACTCGACA	MS157	1699750	322.84	281	0.318434	0.0354258	1.97579	1.96989	-6.78255	0.441674	0.261297	0.0720217	95.3302	37.2105	21	1.93466	2	good
TACACTCGACA	MS81	7363725	1398.62	1132	0.351107	0.0897715	1.76257	1.77222	-3.78522	0.881824	0.522699	0.0510395	308.909	129.216	16	1.59772	2	good
TACACTCGACA	NZ169	1267295	240.702	18	1.60951	0.145779	3.94024	3.93812	5.36528	0.0856689	1.00712	0.454791	311.984	101.742	1	2.29155	2	bad
TACACTCGACA	NZ170	2664550	506.087	89	0.503405	0.0806254	3.09245	3.0588	-166.161	0.865073	2.83011	0.313882	540.631	157.787	29	1.68148	0	bad
TACACTCGACA	NZ186	3328920	632.274	526	0.334551	0.110787	4.75683	4.77341	-8.29663	0.515075	0.339126	0.170836	31.0719	6.08768	43	4.80038	5	bad
TACACTCGACA	NZ250	69296	13.1616	4	1.30515	0.134911	7.30579	7.28153	-3.99689	0.152616	1.00858	0.200464	233.473	42.137	32	4.83799	6	bad
TACAGTACAGT	MS157	1445951	274.635	241	0.306585	0.0306326	1.96946	1.9726	-6.94769	0.458809	0.24686	0.067668	20.6017	7.56971	4	1.9472	2	good
TACAGTACAGT	MS81	4180953	794.103	677	0.313903	0.196148	4.64238	4.66212	-18.014	0.559973	0.312542	0.143964	37.5219	6.90838	13	4.65584	5	bad
TACAGTACAGT	NZ169	1241136	235.733	15	1.69098	0.142336	2.98292	2.9395	3.78543	0.0941965	0.770926	0.501654	515.711	166.582	3	2.26876	2	bad
TACAGTACAGT	NZ170	1817382	345.182	263	0.388466	0.127529	1.50805	1.4916	-15.3876	0.709895	0.575417	0.322031	700.718	322.123	44	1.5265	1	good
TACAGTACAGT	NZ186	2407260	457.219	385	0.400303	0.152634	5.98615	5.9807	-4.47165	0.513555	0.479285	0.191759	124.992	21.283	0	5.79772	5	bad
TACAGTACAGT	NZ250	65881	12.513	6	1.19053	0.159655	2.23084	2.26165	-4.78401	0.126946	0.696353	0.015713	855.319	310.054	5	2.03913	2	bad
TACATCACCAG	MS157	1299376	246.795	216	0.323815	0.0800793	1.94174	1.93383	-8.9295	0.492347	0.316232	0.0654843	188.958	74.2362	2	1.89364	2	good
TACATCACCAG	MS81	320060	60.7901	26	1.23439	0.183342	4.94959	4.94668	14.2751	0.0991455	0.51556	0.10879	302.455	53.3411	15	4.70313	5	bad
TACATCACCAG	NZ169	3314545	629.543	35	1.43607	0.188477	7.20158	7.19316	7.63389	0.24486	1.47627	0.408246	229.142	93.195	3	3.76619	1	bad
TACATCACCAG	NZ170	1657541	314.823	23	1.33581	0.105656	8.55037	8.49741	5.93285	0.309707	1.22276	2.893	164.662	48.5905	1	4.99772	2	bad
TACATCACCAG	NZ186	3201538	608.079	510	0.317379	0.148769	4.88663	4.88662	-10.1829	0.639681	0.327667	0.197349	48.2504	8.30821	57	4.79069	5	bad
TACATCACCAG	NZ250	70082	13.3109	4	1.39106	0.115558	3.27511	3.30771	-4.16537	0.0844818	1.16906	0.0245636	488.031	162.943	34	2.10788	2	bad
TACCAGTCAAG	MS157	1288918	244.809	136	0.642537	0.147887	3.75788	3.77335	-5.43474	0.501209	1.70067	0.092027	631.172	171.702	0	3.07331	0	bad
TACCAGTCAAG	MS81	3616668	686.926	520	0.455827	0.121915	1.94761	1.98516	-20.3072	0.301309	0.413564	0.0548447	673.455	248.22	8	1.97018	2	good
TACCAGTCAAG	NZ169	1912620	363.271	15	1.48541	0.0915111	11.3735	11.4135	14.5469	0.196618	1.46539	2.48596	105.214	28.9749	3	5.67711	2	bad
TACCAGTCAAG	NZ170	352550	66.9611	7	1.66229	0.136496	6.43426	6.43966	-18.0923	0.0955864	0.673193	0.240783	264.183	38.2761	21	5.80152	6	bad
TACCAGTCAAG	NZ186	2004933	380.804	314	0.349881	0.118382	1.89014	1.87869	-11.2137	0.558327	0.393632	0.0816621	262.147	100.939	10	1.8754	2	good
TACCAGTCAAG	NZ250	40008	7.59886	2	1.08183	0.118921	3.07717	3.09338	-27.0159	0.304272	1.65064	0.172641	861.091	298.542	34	2.51966	1	bad
TACCGCATGTG	MS157	57754	10.9694	4	1.37646	0.181302	2.1375	2.14275	-12.0428	0.121964	1.52043	0.089221	941.479	425.622	2	1.41633	1	bad
TACCGCATGTG	MS81	149539	28.4025	13	1.19321	0.117264	2.01274	2.01367	-35.6678	0.0893897	0.525828	0.0658307	764.397	273.592	0	1.99297	2	bad
TACCGCATGTG	NZ169	2377347	451.538	366	0.334769	0.0874702	2.21342	2.23878	-17.7211	0.702089	0.41103	0.615651	173.664	56.2675	2	2.26344	2	good
TACCGCATGTG	NZ170	1274602	242.09	174	0.386675	0.0732275	2.24805	2.26566	-34.8703	0.647223	0.421915	0.815996	315.417	105.475	14	2.35442	2	good
TACCGCATGTG	NZ186	1208536	229.542	14	1.38652	0.0920871	3.12762	3.14014	5.16549	0.311861	0.532438	6.43856	578.066	302.452	9	5.8642	1	bad
TACCGCATGTG	NZ250	22115	4.20038	2	1.41063	0.197738	3.58486	3.58552	-49.987	0.0763806	1.37156	0.109301	514.09	126.756	55	3.19183	3	bad
TACGAATCGGA	MS157	1529659	290.534	243	0.344636	0.0418786	1.95659	1.96469	-8.28483	0.414203	0.286667	0.0735595	110.242	42.4266	11	1.94511	2	bad
TACGAATCGGA	MS81	2231113	423.763	349	0.323647	0.0970006	1.96768	1.99372	-12.8079	0.473567	0.288253	0.056248	149.267	57.0832	3	1.96144	2	good
TACGAATCGGA	NZ169	47907	9.09915	7	0.745862	0.178028	2.0119	2.02125	-4.68039	0.0979529	0.624791	0.0731815	932.092	336.84	0	2.02013	2	bad
TACGAATCGGA	NZ170	646493	122.791	11	1.64839	0.19921	8.88245	8.88601	11.0876	0.112695	0.994242	2.35863	162.706	27.7376	4	5.76448	5	bad
TACGAATCGGA	NZ186	2425329	460.651	389	0.313127	0.0687519	1.97319	1.96306	-6.70754	0.455803	0.241793	0.0646518	27.0263	10.548	4	1.94093	2	good
TACGAATCGGA	NZ250	3226248	612.773	493	0.344433	0.165351	1.93901	1.9541	-10.028	0.656428	0.389992	0.187622	243.969	101.463	5	1.94473	2	bad
TACGACTTCCT	MS157	1904410	361.711	305	0.310965	0.182702	4.32616	4.33019	-5.68213	0.708006	0.336349	0.247199	9.76266	1.94375	2	4.15005	4	bad
TACGACTTCCT	MS81	247849	47.0748	24	1.07246	0.112668	3.37455	3.38621	38.5218	0.109534	0.425974	0.00388432	271.134	63.2009	7	3.41064	3	bad
TACGACTTCCT	NZ169	5145417	977.287	28	0.405566	0.0418236	2.44648	2.41252	5.91193	0.919314	0.877182	0.122718	355.467	313.553	2	1.45166	0	bad
TACGACTTCCT	NZ170	2367213	449.613	339	0.38117	0.0901272	2.21745	2.22418	-20.0702	0.622695	0.411844	0.651607	305.762	101.172	4	2.24311	2	good
TACGACTTCCT	NZ186	3556943	675.583	558	0.490164	0.161432	2.23062	2.23769	-3.80156	0.461084	0.552525	0.115198	579.607	201.647	44	2.14948	2	bad
TACGACTTCCT	NZ250	527851	100.257	18	1.65685	0.229131	5.7689	5.78651	-12.1789	0.0504235	1.08243	0.477109	339.154	66.5939	2	4.38196	4	bad
TACGGAGATCG	MS157	888425	168.742	8	0.961195	0.122204	3.73777	3.66126	-8.06262	0.387741	2.40619	0.113055	421.903	363.351	10	1.36809	0	bad
TACGGAGATCG	MS81	124344	23.6171	19	0.478149	0.0928595	1.95106	1.9854	-9.75079	0.209679	0.437349	0.0666909	590.038	217.495	1	1.97512	2	bad
TACGGAGATCG	NZ169	63888	12.1345	10	0.617189	0.14998	3.22405	3.23524	-6.45152	0.160284	0.579312	0.639644	501.025	125.155	2	3.23685	3	bad
TACGGAGATCG	NZ170	222826	42.3221	7	1.67908	0.171009	4.55564	4.51193	-8.98869	0.091387	0.714455	0.588786	409.495	84.6006	6	4.1189	4	bad
TACGGAGATCG	NZ186	1518063	288.331	259	0.279925	0.0269987	1.97466	1.97053	-6.67817	0.467292	0.228295	0.060293	18.8786	7.29226	5	1.9472	2	good
TACGGAGATCG	NZ250	25808	4.9018	2	1.24256	0.177422	8.75051	8.72207	-168.286	0.159744	1.7583	0.337902	261.255	46.404	9	5.58386	6	bad
TACTAGCACGA	MS157	1334098	253.39	206	0.41281	0.133786	5.52234	5.51623	-5.35743	0.641804	0.473139	0.213239	123.506	19.9046	2	5.39164	6	bad
TACTAGCACGA	MS81	5735350	1089.34	929	0.345491	0.159072	1.95959	1.95197	-18.4017	0.563223	0.381975	0.0632431	455.028	170.58	5	1.94302	2	good
TACTAGCACGA	NZ169	3459249	657.027	481	0.392274	0.106432	1.86046	1.86755	-3.05959	0.870017	0.603323	0.343082	275.035	121.193	3	1.5886	2	good
TACTAGCACGA	NZ170	938533	178.259	18	1.6021	0.159754	4.56663	4.54413	5.15077	0.119219	0.993061	0.362238	291.471	87.9168	15	2.86952	2	bad
TACTAGCACGA	NZ186	2603181	494.431	403	0.351002	0.175181	5.90085	5.87427	-6.47531	0.642303	0.409798	0.172537	37.8323	5.34035	23	5.79677	6	bad
TACTAGCACGA	NZ250	46130	8.76163	6	0.992153	0.122514	2.25403	2.2294	-3.84376	0.114663	0.731839	0.0545959	817.898	300.823	2	1.9208	2	bad
TACTGAGTATC	MS157	974528	185.096	140	0.40089	0.162011	3.59676	3.6505	-3.73773	0.676505	0.57695	0.243486	116.964	40.0241	4	3.24255	3	bad
TACTGAGTATC	MS81	6108005	1160.11	923	0.331543	0.168019	1.99537	2.00875	-9.33435	0.528264	0.295806	0.0548206	197.643	73.7488	0	1.95783	2	good
TACTGAGTATC	NZ169	2906512	552.044	455	0.336591	0.188969	5.62016	5.61844	-13.7513	0.691764	0.434758	1.71103	98.498	14.0726	36	5.7056	5	bad
TACTGAGTATC	NZ170	1639774	311.448	241	0.368269	0.109495	2.30477	2.31097	-19.9367	0.689261	0.495805	0.68373	284.534	92.252	51	2.33884	3	good
TACTGAGTATC	NZ186	2585950	491.159	429	0.335344	0.151535	2.08965	2.0874	-22.4429	0.562901	0.335308	0.0869711	365.42	129.72	6	2.05204	2	good
TACTGAGTATC	NZ250	50442	9.58063	4	1.07196	0.116044	4.26784	4.27912	-3.8404	0.144119	0.891176	0.174587	440.484	103.348	2	3.47502	3	bad
TACTTGGCGGT	MS157	621376	118.02	66	0.464966	0.137275	3.29993	3.25114	-2.9572	0.743805	0.75459	0.0576053	255.446	81.4652	41	2.70902	2	bad
TACTTGGCGGT	MS81	4555067	865.16	733	0.35311	0.117938	2.00535	2.00271	-22.0203	0.425524	0.336234	0.0422308	318.076	116.993	5	1.99962	2	good
TACTTGGCGGT	NZ169	3242535	615.866	489	0.360007	0.082572	1.92441	1.95298	-8.61376	0.424973	0.297411	-0.0258762	189.98	76.0999	6	1.92612	2	good
TACTTGGCGGT	NZ170	1244531	236.378	169	0.373283	0.159505	4.27967	4.26517	-9.61568	0.758791	0.557584	1.51114	152.952	29.4156	15	4.32764	4	bad
TACTTGGCGGT	NZ186	614489	116.712	15	1.67049	0.0904799	2.11496	2.12365	8.58322	0.0754412	0.497371	0.934177	854.995	305.684	24	2.55119	2	bad
TACTTGGCGGT	NZ250	10580	2.0095	0	1.46163	0.141106	2.49299	2.45938	25.7608	0.08738	1.27592	0.17671	557.769	186.543	35	1.54872	1	bad
TAGATGAGGCA	MS157	1545193	293.484	253	0.334989	0.0584621	1.9575	1.96444	-7.53461	0.40849	0.276526	0.0717104	88.332	34.1362	6	1.9396	2	good
TAGATGAGGCA	MS81	4442693	843.816	646	0.671617	0.147735	5.28224	5.27582	-14.2367	0.166805	0.659523	0.134142	359.85	58.7398	1	5.32783	6	bad
TAGATGAGGCA	NZ169	3323013	631.152	505	0.336999	0.118081	2.04575	2.02691	-6.48286	0.842581	0.505474	0.557941	192.501	67.8216	37	2.02792	2	good
TAGATGAGGCA	NZ170	279066	53.004	9	1.63853	0.121897	5.66329	5.67871	-15.4682	0.0761643	0.593063	0.44909	263.1	41.2354	10	5.48471	5	bad
TAGATGAGGCA	NZ186	2735227	519.511	410	0.363047	0.0634408	1.82024	1.83891	-8.9961	0.548414	0.37102	0.0735686	285.519	112.623	60	1.82507	2	good
TAGATGAGGCA	NZ250	3954216	751.038	492	0.522998	0.16041	4.78885	4.77546	-2.33612	0.714474	0.813984	0.285296	313.748	90.8938	1	3.8245	4	bad
TAGCGCCAGCA	MS157	1599026	303.709	222	0.534382	0.137761	3.1035	3.07632	-4.01061	0.587693	1.00859	0.176379	759.911	173.618	36	3.55878	3	bad
TAGCGCCAGCA	MS81	164876	31.3155	18	0.997574	0.194211	2.04613	2.06876	253.549	0.126132	0.484177	0.0716258	651.685	233.557	5	2.06534	2	bad
TAGCGCCAGCA	NZ169	62144	11.8032	9	0.719394	0.159268	2.08605	2.09778	-6.25404	0.123469	0.578792	0.166429	761.724	259.837	3	2.12764	2	bad
TAGCGCCAGCA	NZ170	1997046	379.306	287	0.391851	0.125513	2.23065	2.24787	-5.91617	0.8074	0.430782	0.621429	283.343	98.6985	28	2.15764	2	good
TAGCGCCAGCA	NZ186	3497440	664.281	38	1.05767	0.132049	2.81327	2.73536	7.96521	0.589137	1.15365	0.139689	348.369	259.269	10	1.45052	0	bad
TAGCGCCAGCA	NZ250	39241	7.45318	4	1.21755	0.152751	7.29949	7.28577	-4.51777	0.0824987	1.11785	0.28724	262.368	37.8024	28	5.97721	6	bad
TAGCTAGATGC	MS157	889433	168.933	142	0.356137	0.0287028	1.9684	1.96169	-8.11199	0.367752	0.292141	0.0659214	117.223	45.6392	5	1.94321	2	good
TAGCTAGATGC	MS81	2988259	567.571	499	0.310932	0.124271	2.02137	2.02094	-11.1211	0.518622	0.306129	0.0679469	168.674	61.2164	6	1.99734	2	good
TAGCTAGATGC	NZ169	54989	10.4443	8	0.61525	0.16305	2.00738	2.04825	-5.96325	0.0803504	0.572467	0.2252	899.555	319.976	2	2.08205	2	bad
TAGCTAGATGC	NZ170	376057	71.4258	13	1.55113	0.183308	2.69142	2.69072	8.4028	0.104746	0.805931	0.282859	504.039	172.535	12	2.10655	2	bad
TAGCTAGATGC	NZ186	1899935	360.861	327	0.30024	0.149452	1.76382	1.8018	-9.55506	0.648345	0.413333	0.080558	300.392	123.992	0	1.77911	2	good
TAGCTAGATGC	NZ250	2272702	431.662	333	0.402716	0.172319	5.18323	5.20347	-2.54925	0.727657	0.672129	0.265339	141.979	63.2551	1	4.01481	5	bad
TAGGTATGAAG	MS157	52414	9.95518	4	1.47522	0.154501	2.34595	2.34542	-4.23418	0.0565174	0.974253	0.0803575	984.574	346.577	14	1.99582	2	bad
TAGGTATGAAG	MS81	2385954	453.173	369	0.447771	0.112275	4.83499	4.80973	-17.7218	0.31796	0.454973	0.127238	229.787	39.2825	4	4.85641	5	bad
TAGGTATGAAG	NZ169	378540	71.8974	9	1.66128	0.148453	2.87667	2.8838	33.5698	0.123717	0.834396	0.154539	622.472	203.282	31	2.25318	2	bad
TAGGTATGAAG	NZ170	1370345	260.274	16	0.829447	0.0971487	2.13322	2.12004	13.8794	0.366217	1.34301	0.545024	796.365	881.133	2	1.39487	0	bad
TAGGTATGAAG	NZ186	429358	81.5495	13	1.15972	0.0641964	1.9458	1.96953	-882.278	0.268909	0.514399	3.72075	1103.96	574.594	4	3.65641	1	bad
TAGGTATGAAG	NZ250	3490717	663.004	494	0.415331	0.174034	2.39988	2.41765	-6.12351	0.749776	0.587704	0.124636	385.064	128.111	0	2.27047	2	bad
TAGTCGGCACC	MS157	2217125	421.106	367	0.321179	0.0585084	1.95991	1.96522	-7.29373	0.423629	0.274049	0.0714576	62.1662	24.2343	0	1.94815	2	good
TAGTCGGCACC	MS81	299931	56.967	24	1.19515	0.115854	2.10759	2.10187	10.632	0.139695	0.422283	0.0252724	519.108	183.724	0	2.15043	2	bad
TAGTCGGCACC	NZ169	4084225	775.731	585	0.394459	0.177899	4.89077	4.88082	-4.73356	0.843508	0.567033	0.815272	90.2743	16.5423	20	4.62982	4	bad
TAGTCGGCACC	NZ170	2358052	447.873	352	0.367898	0.177607	2.48062	2.50053	-5.22175	0.784825	0.458027	0.0365351	206.75	61.6433	24	2.35708	3	good
TAGTCGGCACC	NZ186	5223412	992.101	30	0.894252	0.0655902	0.659157	0.671439	2.73607	0.652117	0.426066	0.412558	2773.51	2938.6	22	1.49915	0	bad
TAGTCGGCACC	NZ250	46992	8.92536	4	1.20889	0.117872	3.83049	3.78884	-6.1174	0.13711	1.26043	0.199063	540.448	147.116	3	2.95233	3	bad
TAGTGGCGCCT	MS157	2099293	398.726	24	0.958826	0.146401	3.34699	3.29888	-24.7864	0.446699	1.99001	0.166384	609.076	527.064	4	1.42982	0	bad
TAGTGGCGCCT	MS81	6061214	1151.23	938	0.324071	0.15333	1.9086	1.93706	-18.2962	0.458115	0.29719	0.0528818	248.667	95.2979	6	1.92707	2	good
TAGTGGCGCCT	NZ169	4421899	839.867	650	0.34084	0.178124	3.45434	3.42736	-37.3822	0.726573	0.462803	1.03287	87.4229	19.713	16	3.52783	3	bad
TAGTGGCGCCT	NZ170	766398	145.565	19	1.61388	0.15348	3.40707	3.40705	5.11809	0.0815732	0.887553	0.432058	326.893	101.801	32	2.3339	2	bad
TAGTGGCGCCT	NZ186	3208347	609.373	506	0.323036	0.0436825	1.79451	1.81165	-9.00779	0.561415	0.311915	0.0741925	87.6088	34.8208	6	1.82279	2	good
TAGTGGCGCCT	NZ250	75793	14.3956	4	1.15119	0.100197	2.01755	2.02138	-5.65639	0.249056	1.13656	-0.0629187	1119.42	638.589	3	1.47711	1	bad
TATCAACCGCG	MS157	423566	80.4494	69	0.337034	0.112863	1.85037	1.87401	-9.4888	0.434789	0.32806	0.0626082	217.899	90.1549	2	1.87104	2	good
TATCAACCGCG	MS81	100035	19	11	1.00685	0.130291	2.09329	2.12268	-14.5898	0.0982581	0.548562	0.0259539	780.952	274.582	0	2.06876	2	bad
TATCAACCGCG	NZ169	2570168	488.161	404	0.33764	0.0667904	2.20565	2.2299	-17.8556	0.67701	0.454139	0.677421	336.782	111.468	1	2.2754	2	good
TATCAACCGCG	NZ170	1398478	265.618	24	1.20004	0.193472	8.91967	8.968	-21.8719	0.248621	2.10153	1.53269	208.734	60.9574	4	3.77018	2	bad
TATCAACCGCG	NZ186	1509109	286.63	15	1.48731	0.0983467	3.7348	3.73002	3.16835	0.264045	0.62268	30.5212	551.067	279.37	0	6.04122	1	bad
TATCAACCGCG	NZ250	2502659	475.339	389	0.332692	0.0511111	2.02165	2.03758	-12.7946	0.677127	0.312669	0.202971	126.467	47.0159	0	2.05584	2	good
TATCATCGTGC	MS157	91262	17.3337	11	0.871491	0.129112	1.98529	1.96596	-8.25166	0.0992121	0.520737	0.067668	758.023	278.034	22	1.9472	2	bad
TATCATCGTGC	MS81	215630	40.9554	16	1.31705	0.148313	2.00702	2.03443	57.7587	0.0882836	0.506702	0.0656554	793.501	291.25	1	1.97341	2	bad
TATCATCGTGC	NZ169	1293378	245.656	49	1.45657	0.0783583	2.55613	2.56083	3.82926	0.209521	0.608372	0.818992	454.985	146.488	1	2.28889	2	good
TATCATCGTGC	NZ170	1392312	264.447	201	0.385306	0.0796652	2.37803	2.39737	-23.2233	0.635174	0.434705	0.670783	234.275	72.6607	30	2.39924	2	good
TATCATCGTGC	NZ186	1809013	343.592	303	0.337658	0.0796617	1.9276	1.96827	-246.131	0.356259	0.237311	0.315914	171.417	65.3924	0	1.97474	2	bad
TATCATCGTGC	NZ250	281471	53.4608	44	0.420015	0.0928285	2.09566	2.08385	-11.8091	0.493855	0.421928	0.221447	389.508	142.269	23	2.0868	2	good
TATGAAGACGT	MS157	1830379	347.65	21	1.56224	0.0918945	7.42939	7.47965	8.53971	0.168881	1.22232	0.447957	209.404	50.1052	2	4.00475	3	bad
TATGAAGACGT	MS81	244537	46.4458	19	1.1869	0.154273	1.9314	1.94807	-72.6318	0.116053	0.438039	0.0652039	583.47	218.287	0	1.96733	2	bad
TATGAAGACGT	NZ169	806762	153.231	15	1.69033	0.180337	2.61237	2.68932	4.12614	0.0576249	0.734058	0.0606458	487.295	173.218	1	2.03191	2	bad
TATGAAGACGT	NZ170	2344684	445.334	367	0.348461	0.150598	3.01772	2.99654	-11.2069	0.698458	0.486924	0.931647	301.209	83.8897	85	2.99734	3	good
TATGAAGACGT	NZ186	3464337	657.994	522	0.350321	0.039955	1.96612	1.96159	-7.86696	0.403482	0.258619	0.0645438	59.7991	23.2348	0	1.9396	2	good
TATGAAGACGT	NZ250	4319739	820.463	595	0.421039	0.0974004	2.05716	2.08801	-15.5022	0.559137	0.407859	0.181539	338.152	119.808	0	2.12061	2	good
TATGGCTACTG	MS157	1813053	344.36	6	1.50099	0.0864787	3.51153	3.54009	-9.85679	0.202546	0.765908	6.04434	678.311	360.983	2	4.66002	1	bad
TATGGCTACTG	MS81	188058	35.7185	17	1.16056	0.0991647	2.01798	2.04313	32.6964	0.0429235	0.447614	0.012133	582.23	211.542	10	2.02013	2	bad
TATGGCTACTG	NZ169	232804	44.2173	9	1.57109	0.196147	3.55453	3.53563	-75.042	0.0813745	0.613569	0.451283	436.556	107.688	74	3.27844	3	bad
TATGGCTACTG	NZ170	1789078	339.806	258	0.364193	0.1109	4.45027	4.4629	-21.1241	0.683997	0.433864	1.30894	62.543	10.4424	2	4.50921	4	bad
TATGGCTACTG	NZ186	2803593	532.496	401	0.504242	0.142935	2.06238	2.10046	-2.88192	0.551239	0.609372	0.1075	908.926	358.686	2	1.87028	2	bad
TATGGCTACTG	NZ250	65818	12.501	2	1.26093	0.123319	11.5592	11.5393	-282.028	0.272862	3.00659	0.556167	287.93	84.837	7	4.64292	2	bad
TATTCGCTTAG	MS157	901760	171.274	69	0.746672	0.168134	2.57026	2.54828	-9.20877	0.433151	1.97329	0.171371	827.845	354.427	2	1.65679	2	bad
TATTCGCTTAG	MS81	5260147	999.078	815	0.342423	0.167523	3.89154	3.88331	-18.5937	0.464974	0.333033	0.120262	94.8192	19.5886	6	3.89649	4	bad
TATTCGCTTAG	NZ169	93029	17.6693	11	0.871427	0.16908	5.90487	5.85083	-10.9409	0.128593	0.59086	0.408959	296.936	45.6296	1	5.78803	6	bad
TATTCGCTTAG	NZ170	1551087	294.603	227	0.368445	0.166616	5.719	5.72866	-19.8937	0.517639	0.351225	0.155866	44.0007	6.08702	24	5.74074	6	bad
TATTCGCTTAG	NZ186	2182699	414.568	362	0.284856	0.12563	1.97073	1.9882	-11.7629	0.510205	0.260748	0.0673927	87.7392	34.1173	15	1.95783	2	good
TATTCGCTTAG	NZ250	2302910	437.4	302	0.414516	0.0758552	1.89874	1.94827	-19.335	0.583119	0.378655	0.191975	280.752	107.087	0	1.97987	2	good
TCAACCGATGA	MS157	2758757	523.98	137	1.1674	0.246831	7.9269	7.88556	-48.7234	0.285011	2.53239	0.285339	235.433	69.2631	2	3.4302	1	bad
TCAACCGATGA	MS81	3020360	573.668	500	0.280297	0.0778482	1.98868	1.98849	-8.55653	0.45975	0.228165	0.0530709	44.3484	17.0813	2	1.9472	2	good
TCAACCGATGA	NZ169	139708	26.5352	21	0.452014	0.169265	2.09903	2.08319	-10.8829	0.285594	0.472236	0.386978	575.888	209.753	1	2.12915	2	good
TCAACCGATGA	NZ170	1093251	207.645	24	1.16217	0.153236	2.48936	2.5308	3.76012	0.4147	0.777525	0.172596	872.686	441.391	40	3.05755	1	bad
TCAACCGATGA	NZ186	2262497	429.724	339	0.343176	0.0551047	1.79009	1.78262	-11.0464	0.55835	0.348109	0.0716358	112.188	43.8748	25	1.79582	2	good
TCAACCGATGA	NZ250	124310	23.6106	17	0.664967	0.250147	4.95469	5.0136	-4.84017	0.369169	0.699948	0.128309	438.967	78.6144	2	4.82032	5	bad
TCAATCCGATT	MS157	1497939	284.509	246	0.332777	0.165161	1.8015	1.8163	-10.4382	0.478758	0.324783	0.0688493	253.281	105.878	2	1.81709	2	good
TCAATCCGATT	MS81	224454	42.6313	15	1.34845	0.157669	5.62858	5.60731	-34.3655	0.0516855	0.461733	0.151551	232.043	36.5158	6	5.54435	6	bad
TCAATCCGATT	NZ169	3193639	606.579	450	0.356023	0.173922	1.44466	1.4536	-20.9819	0.720437	0.496266	0.380199	573.111	272.897	1	1.48262	1	good
TCAATCCGATT	NZ170	1700264	322.937	228	0.382555	0.129301	4.25542	4.24647	-2.7335	0.897737	0.86344	0.660625	150.167	33.6698	0	3.56258	3	bad
TCAATCCGATT	NZ186	2474472	469.985	411	0.296738	0.147976	2.97131	2.97932	-9.44535	0.73918	0.409358	0.174322	57.1621	15.8183	0	2.94055	3	good
TCAATCCGATT	NZ250	3026013	574.741	470	0.45925	0.186573	4.68109	4.67819	-3.23301	0.540461	0.61503	0.0917036	380.55	78.02	6	4.18101	4	bad
TCACAACATAG	MS157	1542637	292.998	67	0.791408	0.148607	3.34623	3.37779	-10.2207	0.447664	2.77783	0.114424	562.232	296.4	11	1.44122	0	bad
TCACAACATAG	MS81	2567954	487.741	414	0.314888	0.152472	1.96873	1.99132	-12.099	0.467917	0.287613	0.0548852	146.631	53.9249	0	1.96163	2	good
TCACAACATAG	NZ169	4453738	845.914	453	0.739936	0.150624	1.7498	1.73915	-11.6595	0.401945	1.1144	0.401914	1090.93	480.357	2	1.60589	1	bad
TCACAACATAG	NZ170	2088970	396.765	306	0.377613	0.114837	2.32275	2.3122	-14.8148	0.663042	0.436589	0.641702	189.369	59.9783	2	2.34378	2	good
TCACAACATAG	NZ186	2240364	425.52	22	1.64121	0.0743543	1.15731	1.14264	4.24679	0.242059	0.458454	0.454078	1545.24	852.599	7	1.4699	1	bad
TCACAACATAG	NZ250	1088509	206.744	8	1.01749	0.158279	1.36077	1.37965	-33.8743	0.388771	0.861284	0.386165	1379.25	1346.39	2	1.45717	0	bad
TCACAGATCTC	MS157	508739	96.6266	1	1.2298	0.0580234	7.49977	7.49509	18.2056	0.210672	4.69064	-0.56093	24.0106	19.5478	2	1.85812	0	bad
TCACAGATCTC	MS81	1267600	240.76	190	0.417626	0.115217	1.98833	1.97622	-18.5674	0.259517	0.36488	0.0551024	488.461	179.945	0	1.985	2	good
TCACAGATCTC	NZ169	30338	5.7622	4	0.725097	0.145832	2.43096	2.38517	-3.41849	0.103858	0.761373	0.358629	789.234	265.997	3	2.24767	2	bad
TCACAGATCTC	NZ170	391815	74.4188	59	0.407325	0.142269	2.96682	2.97121	-5.62906	0.626397	0.63128	0.82384	426.822	114.299	17	2.91985	3	bad
TCACAGATCTC	NZ186	375922	71.4002	6	1.42502	0.0895504	1.91071	1.92665	-27.4436	0.195543	0.792302	0.472633	1211.17	637.376	38	2.22108	1	bad
TCACAGATCTC	NZ250	8938	1.69763	0	1.3625	0.13239	9.37803	9.41464	15.4588	0.122889	0.805897	0.0813687	154.528	23.0626	1	6.00437	4	bad
TCAGAATAGCT	MS157	1685609	320.154	172	0.871777	0.163776	4.82326	4.83444	-5.81267	0.394252	1.43323	-0.0884939	412.536	95.7637	0	3.85071	4	bad
TCAGAATAGCT	MS81	4299686	816.655	673	0.369322	0.0629866	1.9562	1.9595	-13.9646	0.346113	0.332502	0.0530709	288.096	108.271	0	1.9472	2	good
TCAGAATAGCT	NZ169	3127808	594.076	463	0.352612	0.14369	2.32943	2.32566	-14.8266	0.706358	0.4294	0.595085	205.837	66.2355	1	2.33276	2	good
TCAGAATAGCT	NZ170	1648439	313.094	243	0.371295	0.189794	2.06758	2.06323	-6.73108	0.754853	0.442679	0.470728	246.246	90.7635	37	1.9981	2	good
TCAGAATAGCT	NZ186	2102860	399.404	322	0.342072	0.186968	3.1858	3.16154	-10.3893	0.544646	0.324845	0.117042	60.5877	15.6306	13	3.12593	3	good
TCAGAATAGCT	NZ250	48893	9.28642	2	1.2302	0.102065	2.16067	2.18395	-83.2915	0.208139	1.60459	0.180072	1006.5	526.072	0	1.50104	1	bad
TCAGACCTGGC	MS157	1005081	190.899	166	0.330877	0.0664419	1.95539	1.96215	-8.79924	0.372472	0.292733	0.0676864	177.92	67.8936	15	1.94663	2	good
TCAGACCTGGC	MS81	149376	28.3715	16	1.01206	0.19295	2.01626	2.05041	-105.859	0.10111	0.489953	0.0502536	783.89	285.062	0	2.02583	2	bad
TCAGACCTGGC	NZ169	3418874	649.359	438	0.478035	0.119931	2.17693	2.21916	19.824	0.63587	0.506858	0.806821	529.068	180.627	3	2.53314	2	good
TCAGACCTGGC	NZ170	1394139	264.794	189	0.409504	0.155386	2.04901	2.08607	-3.82738	0.832607	0.713592	0.64677	395.558	151.962	30	1.87293	3	good
TCAGACCTGGC	NZ186	1895470	360.013	322	0.282146	0.0442409	1.79652	1.81072	-9.44696	0.601901	0.303436	0.080592	53.4021	21.8122	0	1.81178	2	good
TCAGACCTGGC	NZ250	2715157	515.699	116	0.499209	0.163097	1.74175	1.70103	-9.81787	0.653496	2.63379	0.174764	1186.4	584.759	13	1.41083	0	bad
TCAGAGGTACG	MS157	547321	103.955	92	0.333084	0.0488201	1.95915	1.95361	-9.13537	0.374301	0.297042	0.067668	188.75	73.2902	1	1.9472	2	good
TCAGAGGTACG	MS81	98819	18.769	6	1.4498	0.0984306	2.31136	2.3054	-5.70359	0.0837738	0.74071	0.0260273	804.096	273.316	11	2.12137	2	bad
TCAGAGGTACG	NZ169	1684619	319.966	241	0.37155	0.0697328	2.39413	2.39284	-21.1686	0.676204	0.425628	0.712205	207.572	68.0631	1	2.42849	2	good
TCAGAGGTACG	NZ170	782563	148.635	6	1.35766	0.171581	6.39483	6.42188	-10.0137	0.256053	1.64316	1.10613	225.524	103.836	0	2.97455	1	bad
TCAGAGGTACG	NZ186	109191	20.739	8	1.17966	0.139866	2.39362	2.3637	-16.1899	0.181338	0.689613	-0.0174367	893.644	303.828	24	2.37816	2	bad
TCAGAGGTACG	NZ250	13501	2.56429	2	1.03637	0.176945	6.68265	6.66186	-39.2211	0.0422495	1.41328	0.366068	334.643	52.9169	34	5.46534	6	bad
TCATCTGCAGG	MS157	710591	134.965	116	0.304075	0.0635346	1.96628	1.96865	-7.86021	0.40522	0.238472	0.067668	32.5372	12.4522	5	1.9472	2	good
TCATCTGCAGG	MS81	95264	18.0938	15	0.524238	0.122483	1.92534	1.92595	-9.36282	0.0784688	0.453209	0.0623343	666.4	251.908	2	1.96182	2	bad
TCATCTGCAGG	NZ169	3074812	584.01	461	0.349897	0.111577	2.1418	2.16103	-12.1172	0.707935	0.392902	0.479532	149.689	51.2641	0	2.15518	2	good
TCATCTGCAGG	NZ170	1640497	311.585	208	0.399091	0.196704	2.51526	2.54871	-6.95026	0.810887	0.674586	0.894146	431.392	128.775	34	2.50199	2	bad
TCATCTGCAGG	NZ186	830818	157.8	19	1.69261	0.0694698	2.12706	2.16029	4.3921	0.0632358	0.521316	0.0653403	583.453	212.825	5	1.96733	2	bad
TCATCTGCAGG	NZ250	105279	19.996	11	1.00281	0.224595	6.30772	6.27273	-6.21463	0.0987311	0.854864	0.428079	292.93	46.168	3	5.28718	5	bad
TCATGAATCAG	MS157	349383	66.3595	7	1.26373	0.092305	2.86597	2.85058	-16.1873	0.173661	0.838931	6.17588	736.973	388.255	2	3.39468	1	bad
TCATGAATCAG	MS81	142111	26.9916	17	0.851679	0.102707	1.95105	1.98325	-19.2049	0.116708	0.459372	0.0652039	651.366	236.225	0	1.96733	2	bad
TCATGAATCAG	NZ169	2970044	564.111	475	0.324113	0.0842255	2.39416	2.43052	-13.6625	0.707452	0.418697	0.632505	180.329	59.804	21	2.42089	2	good
TCATGAATCAG	NZ170	349767	66.4325	11	1.44235	0.130186	9.02277	9.02908	22.7209	0.105274	0.982007	1.78382	180.426	28.9011	0	6.01443	5	bad
TCATGAATCAG	NZ186	1572965	298.759	246	0.341297	0.0423562	1.95524	1.94908	-8.51798	0.400971	0.270595	0.0650103	92.6047	36.4924	24	1.94549	2	good
TCATGAATCAG	NZ250	59512	11.3033	8	0.70453	0.180815	4.22348	4.21548	-3.52497	0.264543	0.877231	0.27023	493.409	105.901	11	3.82507	4	bad
TCATGGTACGT	MS157	339568	64.4953	57	0.35574	0.201887	1.9311	1.98237	-7.47999	0.526204	0.355328	0.10969	298.075	113.666	4	1.95423	2	good
TCATGGTACGT	MS81	1250243	237.463	184	0.401346	0.178035	2.11848	2.10791	-7.3258	0.671048	0.391432	0.0968716	393.27	148.042	14	2.02963	2	good
TCATGGTACGT	NZ169	481606	91.4731	25	1.17388	0.198931	7.89572	7.92533	12.0143	0.246433	1.0002	2.26765	177.906	30.634	18	5.48395	5	bad
TCATGGTACGT	NZ170	108156	20.5425	5	1.41121	0.179125	6.6258	6.57768	-4.84408	0.129734	1.01648	0.710291	234.07	45.3615	14	4.54549	5	bad
TCATGGTACGT	NZ186	1025252	194.73	173	0.350206	0.173611	2.52798	2.54734	-4.54101	0.637612	0.397309	0.151613	145.171	54.3577	2	2.41216	3	good
TCATGGTACGT	NZ250	872785	165.771	100	0.647075	0.163341	2.29716	2.31723	-2.50033	0.481049	0.961367	0.171974	970.586	340.299	2	2.08889	2	bad
TCCGCTCTTAT	MS157	998912	189.727	112	0.680439	0.207088	3.48831	3.52661	-3.34367	0.440479	1.1054	0.0484483	646.21	163.315	3	3.40931	3	bad
TCCGCTCTTAT	MS81	129606	24.6165	13	1.07724	0.0698595	1.95534	1.97325	-27.6329	0.0524382	0.484528	0.0652039	778.095	290.622	14	1.96733	2	bad
TCCGCTCTTAT	NZ169	2523541	479.305	383	0.365888	0.114487	1.94151	1.92816	-13.195	0.361543	0.302623	-0.00610928	172.857	65.7336	4	1.93542	2	good
TCCGCTCTTAT	NZ170	1036836	196.93	145	0.389396	0.122884	1.68428	1.72252	-9.41474	0.714722	0.498637	0.449712	553.023	227.875	25	1.70978	2	good
TCCGCTCTTAT	NZ186	1567764	297.771	248	0.346976	0.103731	5.37078	5.35304	-5.70513	0.69283	0.394941	0.265125	35.3173	6.40531	4	5.18803	6	bad
TCCGCTCTTAT	NZ250	7575	1.43875	0	1.30746	0.080973	6.25693	6.22846	22.7278	0.0280644	1.08704	0.114028	199.311	38.2598	16	4.35062	4	bad
TCCTTATCCGC	MS157	828863	157.429	137	0.341158	0.161665	1.91132	1.92551	-5.72971	0.602149	0.32524	0.0869466	187.484	74.423	2	1.8699	2	good
TCCTTATCCGC	MS81	418239	79.4376	42	1.0041	0.0971236	1.97258	1.97973	8.90262	0.11615	0.374215	0.0530709	413.669	149.819	0	1.9472	2	bad
TCCTTATCCGC	NZ169	718683	136.502	10	1.68125	0.216458	7.10946	7.10754	6.14496	0.142833	0.817489	1.02448	273.94	46.7364	0	5.83134	4	bad
TCCTTATCCGC	NZ170	1109632	210.756	160	0.382282	0.150603	2.10839	2.13632	-10.4434	0.717455	0.470611	0.660503	359.872	125.826	11	2.10389	2	good
TCCTTATCCGC	NZ186	1705291	323.892	279	0.301031	0.0785549	1.87138	1.88418	-8.18027	0.575265	0.289882	0.0654655	85.4533	35.1334	0	1.8585	2	good
TCCTTATCCGC	NZ250	149209	28.3398	22	0.512167	0.0893668	1.99947	2.00508	-7.85529	0.316079	0.552361	0.225597	711.023	259.967	12	2.04274	2	bad
TCCTTCTAGCG	MS157	1444197	274.301	241	0.32202	0.0614121	1.97138	1.96914	-7.99589	0.423393	0.275642	0.0714035	113.44	44.2461	6	1.94891	2	good
TCCTTCTAGCG	MS81	5095920	967.886	827	0.33198	0.0925109	1.96489	1.9716	-13.3933	0.418786	0.290746	0.053062	193.281	73.2047	9	1.94606	2	good
TCCTTCTAGCG	NZ169	65494	12.4395	9	0.722417	0.174745	2.21293	2.24932	-6.40898	0.150644	0.563432	0.230203	720.456	240.037	4	2.2699	2	bad
TCCTTCTAGCG	NZ170	482582	91.6585	10	1.48909	0.130902	2.15753	2.20543	-333.02	0.201083	0.651526	6.46304	983.357	498.346	48	3.32213	1	bad
TCCTTCTAGCG	NZ186	2304589	437.719	382	0.29245	0.0763159	1.93153	1.92117	-7.72773	0.768459	0.379683	0.0760939	73.6083	28.5842	2	1.8963	2	good
TCCTTCTAGCG	NZ250	3397776	645.352	495	0.391162	0.105037	1.9353	1.97154	-9.52251	0.623574	0.484398	0.255965	431.092	167.765	5	2.00817	2	good
TCGAACATGAT	MS157	913922	173.584	8	1.21821	0.151839	5.22797	5.19847	-7.74572	0.337542	2.55167	0.270219	255.804	148.07	3	1.99639	0	bad
TCGAACATGAT	MS81	2807496	533.238	445	0.464607	0.200416	1.99197	2.00285	-15.4011	0.36342	0.476579	0.0560727	713.922	252.831	11	2.00399	2	good
TCGAACATGAT	NZ169	40867	7.76201	6	0.73771	0.0876816	2.04727	2.08074	-4.19993	0.0710372	0.623744	0.161678	921.676	329.684	2	2.00684	2	bad
TCGAACATGAT	NZ170	168089	31.9257	6	1.47438	0.166542	4.32139	4.3632	-11.3022	0.151694	0.829097	0.704675	392.831	97.8259	12	3.25128	3	bad
TCGAACATGAT	NZ186	646636	122.818	108	0.336418	0.188999	3.48453	3.50747	-9.76304	0.624156	0.486057	0.0757519	237.555	56.6536	48	3.49535	3	bad
TCGAACATGAT	NZ250	35105	6.66762	4	1.12716	0.148402	2.13551	2.17147	-3.25827	0.0449834	0.831178	0.0695097	1067.23	381.604	2	1.93998	2	bad
TCGAATTGTCA	MS157	87456	16.6108	8	1.2371	0.149473	2.18339	2.23916	-6.17506	0.153562	0.716396	0.0708632	873.598	304.438	0	2.02887	2	bad
TCGAATTGTCA	MS81	152687	29.0004	22	0.627591	0.110747	1.97373	1.99055	-51.936	0.198843	0.42393	0.0702538	577.979	212.672	11	2.0133	2	bad
TCGAATTGTCA	NZ169	58530	11.1168	9	0.641107	0.126231	2.07753	2.08762	-6.62151	0.129764	0.588418	0.202187	835.316	296.091	24	2.06325	2	bad
TCGAATTGTCA	NZ170	1462050	277.692	207	0.383765	0.178143	2.15433	2.15185	-27.1109	0.648455	0.449784	0.577441	396.41	135.694	27	2.20304	2	bad
TCGAATTGTCA	NZ186	2308822	438.523	328	0.530208	0.163736	2.46954	2.49515	-4.88484	0.585287	0.887234	0.155257	800.978	267.981	4	2.61045	2	bad
TCGAATTGTCA	NZ250	56448	10.7214	7	0.841695	0.11606	6.9809	6.98905	-3.93568	0.188658	0.864693	0.365642	297.805	46.1459	0	5.93542	5	bad
TCGACATCTGT	MS157	1906879	362.18	299	0.331694	0.0973879	3.20089	3.24691	-6.66914	0.676692	0.363905	0.17326	25.6478	6.29308	59	3.17854	3	good
TCGACATCTGT	MS81	220069	41.7985	15	1.37611	0.0728595	2.11809	2.11773	-124.627	0.130044	0.550961	0.0758897	731.909	252.898	17	2.11263	2	bad
TCGACATCTGT	NZ169	53985	10.2536	8	0.693026	0.128569	2.17001	2.16215	-6.02857	0.132422	0.635701	0.214302	851.45	283.886	14	2.17987	2	bad
TCGACATCTGT	NZ170	621653	118.073	12	1.67488	0.166723	3.14589	3.14639	7.41172	0.107638	0.853904	0.296482	483.816	154.892	17	2.33827	2	bad
TCGACATCTGT	NZ186	2321218	440.877	29	1.38288	0.190392	4.23773	4.28445	4.00868	0.361095	1.05886	0.529705	275.181	148.608	2	3.03229	1	bad
TCGACATCTGT	NZ250	3559085	675.99	586	0.310011	0.108686	1.99256	1.98283	-9.80413	0.321638	0.232581	0.00907169	41.3641	15.8713	0	1.98291	2	good
TCGCACTGAGT	MS157	1899143	360.711	118	0.789298	0.151254	3.57258	3.58217	-6.75834	0.478541	2.66608	0.0610216	593.567	251.972	5	1.74188	0	bad
TCGCACTGAGT	MS81	6210172	1179.52	1017	0.372282	0.0960655	1.96369	1.96904	-11.3566	0.358685	0.342874	0.053175	305.028	115.317	17	1.94625	2	good
TCGCACTGAGT	NZ169	73757	14.0089	11	0.584799	0.0896756	2.05174	2.05869	-7.52703	0.119996	0.534335	0.146363	644.369	223.675	8	2.04027	2	bad
TCGCACTGAGT	NZ170	306783	58.2684	11	1.61206	0.12632	2.08023	2.06844	-95.5795	0.0931858	0.575801	0.116143	743.885	268.11	26	1.97379	2	bad
TCGCACTGAGT	NZ186	2785269	529.016	475	0.303737	0.181117	1.92207	1.91225	-10.2883	0.565656	0.340862	0.0627068	294.043	116.015	0	1.90123	2	good
TCGCACTGAGT	NZ250	4283033	813.492	107	1.15357	0.183834	3.45277	3.39619	-119.514	0.40178	2.51161	0.336801	509.45	246.723	14	1.41443	0	bad
TCGGCTAACCG	MS157	1593444	302.648	265	0.310392	0.0928736	1.99525	1.98802	-6.0847	0.505655	0.26246	0.067668	43.2359	16.7539	0	1.9472	2	good
TCGGCTAACCG	MS81	4487832	852.39	618	0.427405	0.119536	1.96563	1.98522	-13.9004	0.400929	0.385658	0.0544908	482.284	187.264	10	1.95233	2	good
TCGGCTAACCG	NZ169	3440972	653.556	544	0.34756	0.0874944	1.97151	1.98809	-5.27826	0.78625	0.26612	0.00777216	95.3446	38.6005	16	1.9132	2	good
TCGGCTAACCG	NZ170	432576	82.1607	10	1.74921	0.0860975	2.10343	2.14449	114.416	0.0416049	0.549909	0.0667211	843.013	300.784	6	2.02013	2	bad
TCGGCTAACCG	NZ186	2855570	542.368	438	0.343218	0.0442902	1.96891	1.95958	-7.72077	0.401712	0.258657	0.0646098	48.4762	18.6292	3	1.94131	2	good
TCGGCTAACCG	NZ250	4081475	775.209	323	0.487011	0.0630622	3.77369	3.7992	-9.62123	0.750766	2.53269	-0.1156	504.927	190.931	2	2.08338	0	bad
TCGGTGGATAG	MS157	48153	9.14587	4	1.43501	0.17546	4.0052	3.97496	-3.30721	0.0725591	0.881649	0.12409	533.806	124.439	0	3.51073	4	bad
TCGGTGGATAG	MS81	2119529	402.57	320	0.351919	0.0514406	1.96602	1.9713	-17.3142	0.267732	0.277838	0.0530709	243.472	92.9141	0	1.9472	2	good
TCGGTGGATAG	NZ169	37379	7.09953	5	0.859574	0.188059	5.97929	5.98768	-3.31857	0.064256	0.668809	0.751259	282.983	44.8124	5	5.47179	5	bad
TCGGTGGATAG	NZ170	1718537	326.408	250	0.375269	0.0826201	2.16136	2.16175	-17.3562	0.683413	0.455283	0.649507	258.258	84.7906	42	2.20152	2	good
TCGGTGGATAG	NZ186	75839	14.4044	11	0.593415	0.0827911	1.97099	1.9882	-7.14918	0.0544457	0.479275	0.0653403	806.827	303.749	2	1.96733	2	bad
TCGGTGGATAG	NZ250	6411	1.21766	0	1.81407	1.33227e-15	2	2	2.35345	0.0748617	8.32891e-15	0	0	0	0	2	2	bad
TCGTGTAGGCC	MS157	164986	31.3364	6	1.65063	0.110561	2.18178	2.16583	-6.02063	0.0678134	0.719567	0.067668	882.144	319.065	11	1.9472	2	bad
TCGTGTAGGCC	MS81	185795	35.2887	28	0.454851	0.07154	1.98247	1.97727	-12.0568	0.182552	0.377496	0.0530709	506.847	188.41	0	1.9472	2	good
TCGTGTAGGCC	NZ169	62895	11.9459	9	0.697718	0.148171	3.38607	3.3622	-6.40183	0.135167	0.605981	0.405337	474.07	115.443	13	3.27616	3	bad
TCGTGTAGGCC	NZ170	2033508	386.231	159	0.984982	0.127682	2.82712	2.83382	-17.1088	0.273675	1.57316	0.42783	676.869	239.695	14	2.04141	1	bad
TCGTGTAGGCC	NZ186	134831	25.6089	20	0.594871	0.0555346	1.93472	1.93722	-13.7488	0.156078	0.425392	0.0592863	678.919	252.534	18	1.9453	2	bad
TCGTGTAGGCC	NZ250	43641	8.28889	6	0.8212	0.200203	2.06894	2.15461	-3.65439	0.111373	0.688757	0.051889	912.005	336.064	0	1.93618	2	bad
TCTAGTGAACT	MS157	1019180	193.576	47	1.18033	0.186789	5.54493	5.53923	-5.44931	0.22504	3.03247	0.0902011	351.759	123.413	0	2.0095	1	bad
TCTAGTGAACT	MS81	105670	20.0703	8	1.28774	0.141933	2.08027	2.11988	-9.48869	0.0667366	0.632667	0.0530709	767.739	277.874	1	1.9472	2	bad
TCTAGTGAACT	NZ169	586108	111.322	6	1.782	0.0955312	8.37259	8.3764	112.075	0.101235	0.864867	0.366057	180.836	27.8061	24	5.83875	6	bad
TCTAGTGAACT	NZ170	1081939	205.496	136	0.388037	0.17543	2.17292	2.1949	-4.01174	0.770491	0.860725	0.565779	521.778	196.592	56	1.99696	1	bad
TCTAGTGAACT	NZ186	1423679	270.404	143	0.450229	0.101041	2.1273	2.11766	-18.5496	0.753871	2.08561	0.0937637	962.802	295.548	0	1.51548	0	bad
TCTAGTGAACT	NZ250	2180613	414.172	332	0.349752	0.0692866	2.00623	2.03181	-16.4798	0.604056	0.333574	0.207383	153.417	56.6913	2	2.06135	2	good
TCTCCAAGCTT	MS157	1774835	337.101	289	0.307949	0.208893	2.90568	2.90947	-5.85501	0.776625	0.424057	0.0415765	150.74	42.5749	25	2.78841	3	good
TCTCCAAGCTT	MS81	345243	65.5732	24	1.32076	0.097968	1.96464	1.98731	15.7844	0.0835596	0.425843	0.0652039	499.079	184.567	4	1.96733	2	good
TCTCCAAGCTT	NZ169	5673517	1077.59	878	0.341286	0.112468	2.39738	2.42149	-21.6599	0.683071	0.450321	0.67117	228.17	69.8896	3	2.45527	2	good
TCTCCAAGCTT	NZ170	2434318	462.359	221	0.851779	0.178298	3.32702	3.34555	-15.8286	0.370622	1.39406	0.147889	646.245	195.046	1	2.74815	2	bad
TCTCCAAGCTT	NZ186	3177470	603.508	478	0.354157	0.0651761	1.96244	1.96651	-8.25855	0.397771	0.273126	0.060293	85.807	33.2636	8	1.9472	2	good
TCTCCAAGCTT	NZ250	54099	10.2752	4	0.974805	0.188419	2.1093	2.12485	-6.10097	0.26885	1.49762	0.0894941	988.47	415.996	3	1.76144	1	bad
TCTCGGTATAC	MS157	791932	150.414	122	0.501911	0.206831	4.38903	4.39084	-9.94569	0.361423	0.543952	0.0842616	369.717	70.0209	0	4.48319	4	bad
TCTCGGTATAC	MS81	166951	31.7096	19	0.922906	0.10462	1.96814	1.98437	347.739	0.147298	0.459364	0.0530709	555.459	205.411	8	1.9472	2	bad
TCTCGGTATAC	NZ169	81080	15.3998	12	0.54725	0.13535	3.46905	3.50814	-7.56028	0.202943	0.574253	0.70774	434.356	103.465	16	3.53637	3	bad
TCTCGGTATAC	NZ170	374616	71.1521	8	1.6345	0.204021	6.11052	6.10466	-6.66194	0.0893331	1.26514	0.835152	220.139	49.7647	12	3.71282	3	bad
TCTCGGTATAC	NZ186	1030953	195.813	17	1.68444	0.124911	2.04304	2.07652	4.39093	0.139458	0.509575	0.0686204	618	235.552	58	1.92802	2	bad
TCTCGGTATAC	NZ250	2217321	421.144	349	0.340377	0.0764029	1.92983	1.96552	-13.1453	0.669738	0.402639	0.152294	190.579	69.7133	0	1.96676	2	good
TCTCGTGTCGC	MS157	1710902	324.958	282	0.312566	0.0567748	1.96004	1.95583	-6.96978	0.422353	0.256653	0.0755588	72.838	28.6224	7	1.9396	2	good
TCTCGTGTCGC	MS81	214736	40.7856	23	0.946087	0.124662	2.10657	2.1013	16.8061	0.135514	0.48842	-0.00764397	661.187	234.188	2	2.04653	2	bad
TCTCGTGTCGC	NZ169	1965047	373.228	30	1.43898	0.192912	4.91265	4.93027	14.9703	0.273962	1.66347	1.19723	378.907	162.611	6	2.44881	1	bad
TCTCGTGTCGC	NZ170	1824123	346.462	264	0.380053	0.13721	2.3701	2.39451	-17.2546	0.658367	0.437823	0.670296	238.323	75.5311	0	2.40133	2	good
TCTCGTGTCGC	NZ186	2611961	496.099	52	1.32309	0.170989	7.22232	7.22976	8.89921	0.335497	1.50778	0.493113	197.368	68.9799	17	3.97284	1	bad
TCTCGTGTCGC	NZ250	3740173	710.384	498	0.442749	0.0965808	1.94133	1.95423	-15.2546	0.500887	0.398469	0.209958	424.353	160.562	5	1.98253	2	good
TCTCTGACAAT	MS157	1286059	244.266	214	0.318579	0.193053	1.88791	1.92597	-7.72801	0.594469	0.350393	0.077408	273.253	107.297	22	1.88072	2	good
TCTCTGACAAT	MS81	4428748	841.168	698	0.328814	0.20578	1.89389	1.94034	-9.00701	0.579963	0.33192	0.052254	282.764	111.813	4	1.89174	2	good
TCTCTGACAAT	NZ169	2446928	464.754	351	0.386911	0.171573	1.66266	1.69967	-8.16408	0.722216	0.506848	0.461027	504.232	227.552	3	1.64425	2	good
TCTCTGACAAT	NZ170	263860	50.1159	8	1.71768	0.208122	3.76589	3.76741	-10.3937	0.0722718	0.661838	0.273593	560.795	127.76	0	3.51073	3	bad
TCTCTGACAAT	NZ186	1849107	351.207	307	0.293133	0.0357193	1.80526	1.82473	-8.51816	0.605974	0.295788	0.0765446	55.978	22.3484	27	1.81709	2	good
[truncated: 307 more rows]
