# Supplementary material for: High clonal diversity and spatial genetic admixture in early prostate cancer and surrounding normal tissue
Source: Research Square preprint supplement (doi:10.21203/rs.3.rs-1093341/v1), 2021-11-19
Supplement: Supplementary file 5 [file a883e393db11e5ff04bf778a.xlsx]

## Sheet: Sequencing performed
Supplementary Table 1. Summary of sequencing runs.
Sequencing run ID	Library ID	Sample name
BICRO188	XZ244	SKBR3 cells
BICRO226+227	NZ72+76	SKBR3 cells
BICRO226+227	NZ73+77	SKBR3 cells
BICRO226+227	NZ74+78	SKBR3 cells
BICRO226+227	NZ75+79	SKBR3 cells
BICRO229	NZ74	SKBR3 cells
BICRO229	MS38	SKBR3 cells
BICRO229	MS32	SKBR3 cells
BICRO229	MS29	SKBR3 cells
BICRO229	MS30	SKBR3 cells
BICRO229	MS31	SKBR3 cells
BICRO229	MS35	SKBR3 cells
BICRO229	MS36	SKBR3 cells
BICRO229	MS37	SKBR3 cells
BICRO221	NZ47	SKBR3 cells
BICRO221	NZ49	SKBR3 cells
BICRO221	NZ50	SKBR3 cells
BICRO221	NZ56	SKBR3 cells
BICRO221	NZ57	SKBR3 cells
BICRO221	NZ58	SKBR3 cells
BICRO218	NZ39	SKBR3 cells
BICRO218	NZ40	SKBR3 cells
BICRO231	NZ86	IMR90 cells
BICRO232	NZ84	MCF10A cells
BICRO217	NZ28	SKBR3 cells
BICRO220	NZ63_hs	SKBR3, IMR90, and S2 cells
BICRO220	NZ63_dm	SKBR3, IMR90, and S2 cells
BICRO276	NZ120	TK6 cells (sgRNA-treated)
BICRO276	NZ121	TK6 cells (sgRNA-treated)
BICRO276	NZ122	TK6 cells (sgRNA-treated)
BICRO276	NZ123	TK6 cells (sgRNA-treated)
BICRO276	NZ124	TK6 cells (sgRNA-treated)
BICRO276	NZ125	TK6 cells (sgRNA-treated)
BICRO276	NZ126	TK6 cells (sgRNA-treated)
BICRO276	NZ127	TK6 cells (sgRNA-treated)
BICRO276	NZ128	TK6 cells (sgRNA-treated)
BICRO276	NZ129	TK6 cells (sgRNA-treated)
BICRO276	NZ130	TK6 cells (sgRNA-treated)
BICRO276	NZ131	TK6 cells (sgRNA-treated)
BICRO276	NZ132	TK6 cells (sgRNA-treated)
BICRO276	NZ133	TK6 cells (sgRNA-treated)
BICRO276	NZ134	TK6 cells (sgRNA-treated)
BICRO276	NZ135	TK6 cells (sgRNA-treated)
BICRO277	NZ175	TK6 cells (control)
BICRO277	NZ179	TK6 cells (control)
BICRO277	NZ180	TK6 cells (control)
BICRO277	NZ181	TK6 cells (control)
BICRO277	NZ182	TK6 cells (control)
BICRO277	NZ183	TK6 cells (control)
BICRO277	NZ169	B1 (breast cancer)
BICRO277	NZ170	B1 (breast cancer)
BICRO277	NZ171	B1 (breast cancer)
BICRO277	NZ172	B1 (breast cancer)
BICRO277	NZ173	B1 (breast cancer)
BICRO277	NZ174	B1 (breast cancer)
BICRO284	NZ249	B2 (breast cancer)
BICRO284	NZ250	B2 (breast cancer)
BICRO284	NZ251	B2 (breast cancer)
BICRO284	NZ252	B2 (breast cancer)
BICRO284	NZ255	B2 (breast cancer)
BICRO284	NZ257	B2 (breast cancer)
BICRO277	MS77	P2 (prostatectomy)
BICRO277	MS78	P2 (prostatectomy)
BICRO277	MS79	P2 (prostatectomy)
BICRO277	MS80	P2 (prostatectomy)
BICRO277	MS81	P2 (prostatectomy)
BICRO277	NZ185	P2 (prostatectomy)
BICRO277	NZ186	P2 (prostatectomy)
BICRO277	NZ187	P2 (prostatectomy)
BICRO277	NZ188	P2 (prostatectomy)
BICRO277	NZ189	P2 (prostatectomy)
BICRO278	NZ209	P2 (prostatectomy)
BICRO278	NZ210	P2 (prostatectomy)
BICRO278	NZ211	P2 (prostatectomy)
BICRO278	NZ213	P2 (prostatectomy)
BICRO278	NZ214	P2 (prostatectomy)
BICRO278	NZ217	P2 (prostatectomy)
BICRO278	NZ218	P2 (prostatectomy)
BICRO278	NZ219	P2 (prostatectomy)
BICRO278	MS135	P2 (prostatectomy)
BICRO278	MS137	P2 (prostatectomy)
BICRO278	MS138	P2 (prostatectomy)
BICRO278	MS139	P2 (prostatectomy)
BICRO278	MS142	P2 (prostatectomy)
BICRO278	MS145	P2 (prostatectomy)
BICRO278	MS102	P2 (prostatectomy)
BICRO278	NZ220	P2 (prostatectomy)
BICRO278	NZ221	P2 (prostatectomy)
BICRO284	MS101	P2 (prostatectomy)
BICRO284	MS143	P2 (prostatectomy)
BICRO284	MS144	P2 (prostatectomy)
BICRO284	NZ208	P2 (prostatectomy)
BICRO284	NZ212	P2 (prostatectomy)
BICRO284	NZ215	P2 (prostatectomy)
BICRO284	NZ216	P2 (prostatectomy)
BICRO284	MS150	P5 (prostatectomy)
BICRO284	MS151	P5 (prostatectomy)
BICRO284	MS153	P5 (prostatectomy)
BICRO284	MS154	P5 (prostatectomy)
BICRO284	MS155	P5 (prostatectomy)
BICRO284	MS156	P5 (prostatectomy)
BICRO284	MS157	P5 (prostatectomy)
BICRO284	MS158	P5 (prostatectomy)
BICRO284	MS159	P5 (prostatectomy)
BICRO284	MS160	P5 (prostatectomy)
BICRO284	MS161	P5 (prostatectomy)
BICRO284	MS162	P5 (prostatectomy)
BICRO284	MS163	P5 (prostatectomy)
BICRO284	NZ226	P5 (prostatectomy)
BICRO284	NZ227	P5 (prostatectomy)
BICRO284	NZ228	P5 (prostatectomy)
BICRO284	NZ229	P5 (prostatectomy)
BICRO284	NZ230	P5 (prostatectomy)
BICRO284	NZ231	P5 (prostatectomy)
BICRO284	NZ232	P5 (prostatectomy)
BICRO284	NZ233	P5 (prostatectomy)
BICRO284	NZ234	P5 (prostatectomy)
BICRO284	NZ235	P5 (prostatectomy)
BICRO284	NZ236	P5 (prostatectomy)
BICRO284	NZ237	P5 (prostatectomy)
BICRO284	NZ238	P5 (prostatectomy)
BICRO284	NZ239	P5 (prostatectomy)
BICRO275	MS152	P5 (prostatectomy)
BICRO246	MS74	P1, P2, P3 (prostatectomies)
BICRO260	MS124	P5, P6 (prostatectomies)
BICRO261	MS125	P1, P3, P4 (prostatectomies)

## Sheet: BICRO188
Supplementary Table 1. Summary of sequencing runs.
Seq_library	Sample	Library	#QCFail	QCFailFraction	#DuplicateMarked	DuplicateFraction	#Unmapped	UnmappedFraction	#Mapped	MappedFraction	#MappedRead1	#MappedRead2	RatioMapped2vsMapped1	#MappedForward	MappedForwardFraction	#MappedReverse	MappedReverseFraction	#SecondaryAlignments	SecondaryAlignmentFraction	#SupplementaryAlignments	SupplementaryAlignmentFraction	#SplicedAlignments	SplicedAlignmentFraction	#Pairs	#MappedPairs	MappedPairsFraction	#MappedSameChr	MappedSameChrFraction	#MappedProperPair	MappedProperFraction	#ReferenceBp	#ReferenceNs	#AlignedBases	#MatchedBases	MatchRate	#MismatchedBases	MismatchRate	#DeletionsCigarD	DeletionRate	HomopolymerContextDel	#InsertionsCigarI	InsertionRate	HomopolymerContextIns	#SoftClippedCigarS	SoftClipRate	#HardClippedCigarH	HardClipRate	ErrorRate	MedianReadLength
XZ244	TGATGCGC	TGATGCGC	0	0	0	0	0	0	12639589	1	12639589	0	0	7141194	0.564986	5498395	0.435014	2187	0.000173028	0	0	0	0	0	0	0	0	0	0	0	3096249852	237019319	699463897	695709069	0.994632	3754828	0.00536815	119740	0.000171188	0.565876	289923	0.000414493	0.939405	756948	0.00108218	0	0	0.00703602	56
[truncated: 9 more columns]

## Sheet: BICRO226+227
Supplementary Table 1. Summary of sequencing runs.
Seq_library	Sample	Library	#QCFail	QCFailFraction	#DuplicateMarked	DuplicateFraction	#Unmapped	UnmappedFraction	#Mapped	MappedFraction	#MappedRead1	#MappedRead2	RatioMapped2vsMapped1	#MappedForward	MappedForwardFraction	#MappedReverse	MappedReverseFraction	#SecondaryAlignments	SecondaryAlignmentFraction	#SupplementaryAlignments	SupplementaryAlignmentFraction	#SplicedAlignments	SplicedAlignmentFraction	#Pairs	#MappedPairs	MappedPairsFraction	#MappedSameChr	MappedSameChrFraction	#MappedProperPair	MappedProperFraction	#ReferenceBp	#ReferenceNs	#AlignedBases	#MatchedBases	MatchRate	#MismatchedBases	MismatchRate	#DeletionsCigarD	DeletionRate	HomopolymerContextDel	#InsertionsCigarI	InsertionRate	HomopolymerContextIns	#SoftClippedCigarS	SoftClipRate	#HardClippedCigarH	HardClipRate	ErrorRate	MedianReadLength
NZ72+76	ACAGTATC	ACAGTATC	0	0	0	0	0	0	306941	1	306941	0	0	153528	0.500187	153413	0.499813	1570	0.00511499	0	0	0	0	0	0	0	0	0	0	0	3099348717	237019319	17574682	17395042	0.989778	179640	0.0102215	7121	0.000405185	0.692178	6190	0.000352211	0.914701	44792	0.00254867	0	0	0.0135276	60
NZ72+76	ACAGTCGA	ACAGTCGA	0	0	0	0	0	0	504399	1	504399	0	0	252242	0.500084	252157	0.499916	2012	0.00398891	0	0	0	0	0	0	0	0	0	0	0	3099166432	237019319	29042673	28729057	0.989202	313616	0.0107985	11834	0.000407469	0.685483	10705	0.000368596	0.913779	63709	0.00219363	0	0	0.0137682	60
NZ72+76	ACGACATC	ACGACATC	0	0	0	0	0	0	550396	1	550396	0	0	275031	0.499697	275365	0.500303	2084	0.00378636	0	0	0	0	0	0	0	0	0	0	0	3099021520	237019319	31748357	31414854	0.989495	333503	0.0105046	13108	0.000412872	0.691028	11631	0.00036635	0.912131	66805	0.0021042	0	0	0.013388	60
NZ72+76	ACGACCGC	ACGACCGC	0	0	0	0	0	0	462239	1	462239	0	0	231001	0.499744	231238	0.500256	1249	0.00270207	0	0	0	0	0	0	0	0	0	0	0	3099263308	237019319	26799561	26519943	0.989566	279618	0.0104337	10676	0.000398365	0.686493	9404	0.000350901	0.913973	47930	0.00178846	0	0	0.0129714	60
NZ72+76	ACGACGAA	ACGACGAA	0	0	0	0	0	0	575166	1	575166	0	0	287541	0.499927	287625	0.500073	2277	0.00395886	0	0	0	0	0	0	0	0	0	0	0	3099288562	237019419	33118819	32755156	0.989019	363663	0.0109806	13390	0.000404302	0.684093	11894	0.000359131	0.916092	73364	0.00221518	0	0	0.0139592	60
NZ72+76	ACGACTCC	ACGACTCC	0	0	0	0	0	0	428880	1	428880	0	0	213582	0.497999	215298	0.502001	1218	0.00283996	0	0	0	0	0	0	0	0	0	0	0	3098798590	237019319	24821349	24542816	0.988778	278533	0.0112215	9831	0.00039607	0.681925	8528	0.000343575	0.916862	47666	0.00192036	0	0	0.0138815	60
NZ72+76	ACTGAATC	ACTGAATC	0	0	0	0	0	0	516614	1	516614	0	0	258163	0.499721	258451	0.500279	1662	0.0032171	0	0	0	0	0	0	0	0	0	0	0	3099168686	237019419	29806404	29479102	0.989019	327302	0.0109809	12033	0.000403705	0.689853	10401	0.000348952	0.906451	62565	0.00209905	0	0	0.0138326	60
NZ72+76	ACTGACGA	ACTGACGA	0	0	0	0	0	0	405452	1	405452	0	0	202361	0.4991	203091	0.5009	996	0.00245652	0	0	0	0	0	0	0	0	0	0	0	3098862222	237019319	23538186	23274298	0.988789	263888	0.0112111	9432	0.000400711	0.685645	8564	0.000363834	0.913709	39959	0.00169762	0	0	0.0136732	60
NZ72+76	ACTGAGAT	ACTGAGAT	0	0	0	0	0	0	211352	1	211352	0	0	105364	0.498524	105988	0.501476	841	0.00397914	0	0	0	0	0	0	0	0	0	0	0	3098935588	237019319	12162749	12037786	0.989726	124963	0.0102742	5094	0.00041882	0.691009	4627	0.000380424	0.914632	27090	0.00222729	0	0	0.0133008	60
NZ72+76	ACTGATCG	ACTGATCG	0	0	0	0	0	0	444411	1	444411	0	0	221682	0.498822	222729	0.501178	956	0.00215116	0	0	0	0	0	0	0	0	0	0	0	3099258314	237019319	25846274	25564998	0.989117	281276	0.0108827	10294	0.000398278	0.687099	9303	0.000359936	0.914329	41543	0.00160731	0	0	0.0132482	60
NZ72+76	AGCCACGC	AGCCACGC	0	0	0	0	0	0	867229	1	867229	0	0	433219	0.499544	434010	0.500456	3464	0.00399433	0	0	0	0	0	0	0	0	0	0	0	3099129793	237019319	49994880	49472961	0.989561	521919	0.0104394	19116	0.000382359	0.686807	17208	0.000344195	0.910565	105163	0.00210348	0	0	0.0132695	60
NZ72+76	AGCCAGAG	AGCCAGAG	0	0	0	0	0	0	387666	1	387666	0	0	194759	0.502389	192907	0.497611	207	0.000533965	0	0	0	0	0	0	0	0	0	0	0	3098571728	237019319	22728862	22477489	0.98894	251373	0.0110596	10368	0.00045616	0.719039	9402	0.000413659	0.921293	25597	0.00112619	0	0	0.0130556	60
NZ72+76	AGCCATCA	AGCCATCA	0	0	0	0	0	0	897621	1	897621	0	0	448281	0.49941	449340	0.50059	3444	0.00383681	0	0	0	0	0	0	0	0	0	0	0	3099322151	237019319	51773304	51215277	0.989222	558027	0.0107783	21264	0.000410714	0.693896	18859	0.000364261	0.911713	108283	0.00209148	0	0	0.0136447	60
NZ72+76	AGCGTATC	AGCGTATC	0	0	0	0	0	0	28356	1	28356	0	0	14370	0.506771	13986	0.493229	176	0.0062068	0	0	0	0	0	0	0	0	0	0	0	3096976273	237019319	1604837	1588283	0.989685	16554	0.0103151	621	0.000386955	0.687601	598	0.000372624	0.899666	5224	0.00325516	0	0	0.0143298	60
NZ72+76	AGCGTCGA	AGCGTCGA	0	0	0	0	0	0	439107	1	439107	0	0	218917	0.49855	220190	0.50145	999	0.00227507	0	0	0	0	0	0	0	0	0	0	0	3098883084	237019319	25506317	25222553	0.988875	283764	0.0111252	9978	0.000391197	0.681299	9191	0.000360342	0.911217	42290	0.00165802	0	0	0.0135348	60
NZ72+76	AGCGTGAT	AGCGTGAT	0	0	0	0	0	0	485572	1	485572	0	0	242850	0.500132	242722	0.499868	1294	0.0026649	0	0	0	0	0	0	0	0	0	0	0	3099026526	237019319	28139798	27848158	0.989636	291640	0.010364	11855	0.000421289	0.692197	10708	0.000380529	0.912495	50401	0.00179109	0	0	0.0129569	60
NZ72+76	AGCGTTCG	AGCGTTCG	0	0	0	0	0	0	463898	1	463898	0	0	231692	0.499446	232206	0.500554	1198	0.00258246	0	0	0	0	0	0	0	0	0	0	0	3099342707	237019319	26906749	26621946	0.989415	284803	0.0105848	10401	0.000386557	0.691664	9732	0.000361694	0.918516	46469	0.00172704	0	0	0.0130601	60
NZ72+76	ATGTGCGC	ATGTGCGC	0	0	0	0	0	0	798574	1	798574	0	0	398975	0.499609	399599	0.500391	2701	0.00338228	0	0	0	0	0	0	0	0	0	0	0	3099222184	237019319	46076668	45616065	0.990004	460603	0.00999645	18599	0.000403653	0.689016	16782	0.000364219	0.914313	100611	0.00218356	0	0	0.0129479	60
NZ72+76	ATGTGGAG	ATGTGGAG	0	0	0	0	0	0	878515	1	878515	0	0	438773	0.499449	439742	0.500551	3556	0.00404774	0	0	0	0	0	0	0	0	0	0	0	3098972398	237019319	50516727	50027738	0.99032	488989	0.00967974	20825	0.00041224	0.691717	19591	0.000387812	0.916033	118558	0.00234691	0	0	0.0128267	60
NZ72+76	ATGTGTCA	ATGTGTCA	0	0	0	0	0	0	196630	1	196630	0	0	98599	0.501444	98031	0.498556	430	0.00218685	0	0	0	0	0	0	0	0	0	0	0	3098309398	237019319	11410131	11258571	0.986717	151560	0.0132829	4746	0.000415946	0.68858	4198	0.000367919	0.914245	20850	0.00182732	0	0	0.0158941	60
NZ72+76	ATTCGATC	ATTCGATC	0	0	0	0	0	0	697984	1	697984	0	0	349128	0.500195	348856	0.499805	2710	0.00388261	0	0	0	0	0	0	0	0	0	0	0	3099214203	237019319	40258255	39839119	0.989589	419136	0.0104112	16712	0.00041512	0.686393	14558	0.000361615	0.912831	84528	0.00209964	0	0	0.0132876	60
NZ72+76	ATTCGCGA	ATTCGCGA	0	0	0	0	0	0	602605	1	602605	0	0	301812	0.500845	300793	0.499155	995	0.00165116	0	0	0	0	0	0	0	0	0	0	0	3099282383	237019319	35137908	34713598	0.987924	424310	0.0120756	14765	0.000420201	0.704098	13490	0.000383916	0.918681	52216	0.00148603	0	0	0.0143657	60
NZ72+76	ATTCGGAT	ATTCGGAT	0	0	0	0	0	0	603525	1	603525	0	0	301587	0.499709	301938	0.500291	2277	0.00377283	0	0	0	0	0	0	0	0	0	0	0	3099322653	237019319	34816198	34429708	0.988899	386490	0.0111009	14140	0.000406133	0.683168	12577	0.00036124	0.911664	72610	0.00208552	0	0	0.0139538	60
NZ72+76	ATTCGTCG	ATTCGTCG	0	0	0	0	0	0	479944	1	479944	0	0	239371	0.498748	240573	0.501252	745	0.00155226	0	0	0	0	0	0	0	0	0	0	0	3098800766	237019319	27986463	27652075	0.988052	334388	0.0119482	11996	0.000428636	0.708069	10616	0.000379326	0.923229	41776	0.00149272	0	0	0.0142489	60
NZ72+76	CACTGATC	CACTGATC	0	0	0	0	0	0	325877	1	325877	0	0	162976	0.500115	162901	0.499885	1398	0.00428996	0	0	0	0	0	0	0	0	0	0	0	3098642619	237019319	18735405	18538576	0.989494	196829	0.0105057	7524	0.000401593	0.683679	6535	0.000348805	0.905585	43256	0.00230878	0	0	0.0135649	60
NZ72+76	CACTGCGA	CACTGCGA	0	0	0	0	0	0	310874	1	310874	0	0	156083	0.502078	154791	0.497922	457	0.00147005	0	0	0	0	0	0	0	0	0	0	0	3098873039	237019319	18135272	17924132	0.988357	211140	0.0116425	7783	0.000429164	0.714121	7068	0.000389738	0.92077	26507	0.00146163	0	0	0.013923	60
NZ72+76	CAGTCATC	CAGTCATC	0	0	0	0	0	0	565491	1	565491	0	0	282965	0.500388	282526	0.499612	1681	0.00297264	0	0	0	0	0	0	0	0	0	0	0	3099156337	237019319	32767328	32412696	0.989177	354632	0.0108227	13235	0.000403908	0.695882	11774	0.000359321	0.909886	59321	0.00181037	0	0	0.0133963	60
NZ72+76	CAGTCCGA	CAGTCCGA	0	0	0	0	0	0	377741	1	377741	0	0	188991	0.500319	188750	0.499681	1058	0.00280086	0	0	0	0	0	0	0	0	0	0	0	3099147186	237019319	21866187	21622874	0.988873	243313	0.0111274	8648	0.000395496	0.691027	7756	0.000354703	0.920835	40964	0.00187339	0	0	0.013751	60
NZ72+76	CAGTCGAT	CAGTCGAT	0	0	0	0	0	0	361721	1	361721	0	0	180905	0.500123	180816	0.499877	1475	0.00407773	0	0	0	0	0	0	0	0	0	0	0	3099346191	237019319	20835103	20610274	0.989209	224829	0.0107909	8702	0.000417661	0.688233	7474	0.000358722	0.914102	45543	0.00218588	0	0	0.0137531	60
NZ72+76	CAGTCTCG	CAGTCTCG	0	0	0	0	0	0	368959	1	368959	0	0	184463	0.499955	184496	0.500045	1248	0.00338249	0	0	0	0	0	0	0	0	0	0	0	3098795567	237019319	21315978	21089088	0.989356	226890	0.0106441	8760	0.000410959	0.692237	7917	0.000371412	0.913098	42750	0.00200554	0	0	0.013432	60
NZ72+76	CATCAATC	CATCAATC	0	0	0	0	0	0	316208	1	316208	0	0	157814	0.499083	158394	0.500917	770	0.00243511	0	0	0	0	0	0	0	0	0	0	0	3099055454	237019319	18343449	18140235	0.988922	203214	0.0110783	7451	0.000406194	0.70769	6490	0.000353805	0.91433	32077	0.00174869	0	0	0.013587	60
NZ72+76	CATCACGC	CATCACGC	0	0	0	0	0	0	1362450	1	1362450	0	0	680716	0.499626	681734	0.500374	3193	0.00234357	0	0	0	0	0	0	0	0	0	0	0	3099578532	237019319	79242923	78495640	0.99057	747283	0.00943028	32734	0.000413084	0.694507	29746	0.000375377	0.919821	118652	0.00149732	0	0	0.0117161	60
NZ72+76	CATCAGAA	CATCAGAA	0	0	0	0	0	0	335128	1	335128	0	0	168064	0.501492	167064	0.498508	571	0.00170383	0	0	0	0	0	0	0	0	0	0	0	3098987138	237019319	19530353	19282277	0.987298	248076	0.0127021	8117	0.000415609	0.705433	7166	0.000366916	0.917248	30371	0.00155507	0	0	0.0150397	60
NZ72+76	CATCATCC	CATCATCC	0	0	0	0	0	0	167825	1	167825	0	0	83730	0.498913	84095	0.501087	477	0.00284225	0	0	0	0	0	0	0	0	0	0	0	3098558771	237019319	9716648	9584280	0.986377	132368	0.0136228	3805	0.000391596	0.692247	3364	0.00034621	0.918252	18948	0.00195006	0	0	0.0163107	60
NZ72+76	CGGATATC	CGGATATC	0	0	0	0	0	0	209607	1	209607	0	0	104771	0.499845	104836	0.500155	984	0.0046945	0	0	0	0	0	0	0	0	0	0	0	3098784027	237019319	12035296	11912849	0.989826	122447	0.010174	4974	0.000413284	0.68275	4392	0.000364927	0.900273	28175	0.00234103	0	0	0.0132932	60
NZ72+76	CGGATCGA	CGGATCGA	0	0	0	0	0	0	833883	1	833883	0	0	416767	0.499791	417116	0.500209	2869	0.00344053	0	0	0	0	0	0	0	0	0	0	0	3099549271	237019319	48141615	47609151	0.98894	532464	0.0110604	19242	0.000399696	0.692132	17706	0.00036779	0.914662	97777	0.00203103	0	0	0.0138589	60
NZ72+76	CGGATGAT	CGGATGAT	0	0	0	0	0	0	120085	1	120085	0	0	59802	0.497997	60283	0.502003	626	0.00521297	0	0	0	0	0	0	0	0	0	0	0	3038366194	200630282	6879657	6807552	0.989519	72105	0.0104809	2803	0.000407433	0.678202	2449	0.000355977	0.922417	17048	0.00247803	0	0	0.0137223	60
NZ72+76	CGGATTCG	CGGATTCG	0	0	0	0	0	0	772101	1	772101	0	0	385643	0.499472	386458	0.500528	2542	0.00329232	0	0	0	0	0	0	0	0	0	0	0	3099878777	237019319	44630011	44158234	0.989429	471777	0.0105708	17997	0.000403249	0.691671	16450	0.000368586	0.912523	86601	0.00194042	0	0	0.0132831	60
NZ72+76	CGTGTCGC	CGTGTCGC	0	0	0	0	0	0	642185	1	642185	0	0	320921	0.499733	321264	0.500267	1943	0.00302561	0	0	0	0	0	0	0	0	0	0	0	3099497297	237019319	37193260	36803227	0.989513	390033	0.0104867	14639	0.000393593	0.683175	13160	0.000353828	0.919301	67858	0.00182447	0	0	0.0130585	60
NZ72+76	CGTGTGAG	CGTGTGAG	0	0	0	0	0	0	17709	1	17709	0	0	8806	0.497261	8903	0.502739	77	0.00434807	0	0	0	0	0	0	0	0	0	0	0	3037209273	200630282	1005967	995229	0.989326	10738	0.0106743	387	0.000384704	0.679587	376	0.00037377	0.898936	3065	0.00304682	0	0	0.0144796	60
NZ72+76	CGTGTTCA	CGTGTTCA	0	0	0	0	0	0	642305	1	642305	0	0	320513	0.499004	321792	0.500996	2645	0.00411798	0	0	0	0	0	0	0	0	0	0	0	3099027956	237019319	36972439	36575243	0.989257	397196	0.010743	14789	0.000400001	0.685104	13315	0.000360133	0.910402	81361	0.00220059	0	0	0.0137037	60
NZ72+76	CTAACCGC	CTAACCGC	0	0	0	0	0	0	968813	1	968813	0	0	483197	0.498752	485616	0.501248	3699	0.00381807	0	0	0	0	0	0	0	0	0	0	0	3099461959	237019319	55898098	55304655	0.989383	593443	0.0106165	22456	0.000401731	0.682624	19341	0.000346005	0.910139	116731	0.00208828	0	0	0.0134525	60
NZ72+76	CTAACGAG	CTAACGAG	0	0	0	0	0	0	965451	1	965451	0	0	482882	0.500162	482569	0.499838	3888	0.00402713	0	0	0	0	0	0	0	0	0	0	0	3099671972	237019319	55647317	55081426	0.989831	565891	0.0101692	23454	0.000421476	0.689989	20685	0.000371716	0.91912	118322	0.00212628	0	0	0.0130887	60
NZ72+76	CTAACTCA	CTAACTCA	0	0	0	0	0	0	653903	1	653903	0	0	326550	0.499386	327353	0.500614	1417	0.00216699	0	0	0	0	0	0	0	0	0	0	0	3099221099	237019319	38007799	37575941	0.988638	431858	0.0113624	15463	0.000406838	0.690358	13487	0.000354848	0.911767	62008	0.00163145	0	0	0.0137555	60
NZ72+76	CTATGATC	CTATGATC	0	0	0	0	0	0	558987	1	558987	0	0	279900	0.500727	279087	0.499273	2223	0.00397684	0	0	0	0	0	0	0	0	0	0	0	3099410369	237019319	32202667	31870992	0.9897	331675	0.0102996	12952	0.000402203	0.68584	11359	0.000352735	0.91575	68953	0.00214122	0	0	0.0131958	60
NZ72+76	CTATGCGA	CTATGCGA	0	0	0	0	0	0	705251	1	705251	0	0	352644	0.500026	352607	0.499974	1774	0.00251542	0	0	0	0	0	0	0	0	0	0	0	3099301209	237019319	40976118	40542601	0.98942	433517	0.0105797	16885	0.000412069	0.696239	15277	0.000372827	0.918701	67851	0.00165587	0	0	0.0130205	60
NZ72+76	CTATGGAT	CTATGGAT	0	0	0	0	0	0	503147	1	503147	0	0	251078	0.499015	252069	0.500985	1518	0.00301701	0	0	0	0	0	0	0	0	0	0	0	3098788663	237019319	29109267	28782402	0.988771	326865	0.0112289	11771	0.000404373	0.69204	10651	0.000365897	0.916064	55646	0.00191162	0	0	0.0139108	60
NZ72+76	CTATGTCG	CTATGTCG	0	0	0	0	0	0	686186	1	686186	0	0	343554	0.500672	342632	0.499328	1699	0.00247601	0	0	0	0	0	0	0	0	0	0	0	3099563028	237019319	39856252	39435229	0.989436	421023	0.0105635	16169	0.000405683	0.6959	14457	0.000362729	0.910147	65296	0.00163829	0	0	0.0129702	60
NZ72+76	GAATCATC	GAATCATC	0	0	0	0	0	0	564914	1	564914	0	0	282701	0.500432	282213	0.499568	2523	0.00446617	0	0	0	0	0	0	0	0	0	0	0	3098813991	237019319	32431550	32073368	0.988956	358182	0.0110442	12977	0.000400135	0.684673	11541	0.000355857	0.908587	76943	0.00237247	0	0	0.0141727	60
NZ72+76	GAATCCGA	GAATCCGA	0	0	0	0	0	0	609536	1	609536	0	0	305051	0.500464	304485	0.499536	1512	0.00248058	0	0	0	0	0	0	0	0	0	0	0	3099089468	237019319	35381734	34993248	0.98902	388486	0.0109798	14758	0.000417108	0.689118	12454	0.00035199	0.914726	60280	0.0017037	0	0	0.0134526	60
NZ72+76	GAATCGAT	GAATCGAT	0	0	0	0	0	0	619313	1	619313	0	0	309632	0.49996	309681	0.50004	2330	0.00376223	0	0	0	0	0	0	0	0	0	0	0	3099688342	237019319	35688734	35307115	0.989307	381619	0.010693	15138	0.000424167	0.689853	13036	0.000365269	0.920144	76719	0.00214967	0	0	0.0136321	60
NZ72+76	GAATCTCG	GAATCTCG	0	0	0	0	0	0	721745	1	721745	0	0	359664	0.498326	362081	0.501674	1908	0.00264359	0	0	0	0	0	0	0	0	0	0	0	3099329362	237019319	41837875	41373849	0.988909	464026	0.0110911	16428	0.000392659	0.68572	14721	0.000351858	0.910876	73758	0.00176295	0	0	0.0135985	60
NZ72+76	GACACCGC	GACACCGC	0	0	0	0	0	0	929653	1	929653	0	0	464121	0.499241	465532	0.500759	3845	0.00413595	0	0	0	0	0	0	0	0	0	0	0	3099359196	237019319	53537300	52989947	0.989776	547353	0.0102238	22158	0.00041388	0.69203	19480	0.000363858	0.912731	118217	0.00220812	0	0	0.0132096	60
NZ72+76	GACACGAG	GACACGAG	0	0	0	0	0	0	894596	1	894596	0	0	447407	0.500122	447189	0.499878	3170	0.0035435	0	0	0	0	0	0	0	0	0	0	0	3099215634	237019319	51645116	51110311	0.989645	534805	0.0103554	20314	0.000393338	0.688835	18737	0.000362803	0.914234	103468	0.00200344	0	0	0.013115	60
NZ72+76	GACACTCA	GACACTCA	0	0	0	0	0	0	324142	1	324142	0	0	162988	0.502829	161154	0.497171	420	0.00129573	0	0	0	0	0	0	0	0	0	0	0	3098279650	237019319	18931624	18669088	0.986132	262536	0.0138676	7775	0.000410688	0.706238	6940	0.000366582	0.910663	27628	0.00145936	0	0	0.0161042	60
NZ72+76	GCTCAATC	GCTCAATC	0	0	0	0	0	0	47609	1	47609	0	0	23714	0.498099	23895	0.501901	154	0.00323468	0	0	0	0	0	0	0	0	0	0	0	3038343966	200630282	2751672	2722532	0.98941	29140	0.0105899	1087	0.000395033	0.667893	944	0.000343064	0.904661	5513	0.00200351	0	0	0.0133315	60
NZ72+76	GCTCACGA	GCTCACGA	0	0	0	0	0	0	846108	1	846108	0	0	423708	0.500773	422400	0.499227	2648	0.00312962	0	0	0	0	0	0	0	0	0	0	0	3099711978	237019319	48986635	48436770	0.988775	549865	0.0112248	19684	0.000401824	0.698638	17824	0.000363854	0.92123	91665	0.00187122	0	0	0.0138617	60
NZ72+76	GCTCAGAT	GCTCAGAT	0	0	0	0	0	0	27555	1	27555	0	0	13943	0.506006	13612	0.493994	67	0.0024315	0	0	0	0	0	0	0	0	0	0	0	3096892661	237019319	1596487	1575692	0.986975	20795	0.0130255	629	0.00039399	0.689984	542	0.000339495	0.916974	3077	0.00192736	0	0	0.0156863	60
NZ72+76	GCTCATCG	GCTCATCG	0	0	0	0	0	0	489595	1	489595	0	0	244507	0.499407	245088	0.500593	1194	0.00243875	0	0	0	0	0	0	0	0	0	0	0	3099079594	237019419	28411452	28092749	0.988783	318703	0.0112174	11618	0.00040892	0.697969	10327	0.00036348	0.908395	49572	0.00174479	0	0	0.0137346	60
NZ72+76	GCTTGCGC	GCTTGCGC	0	0	0	0	0	0	527873	1	527873	0	0	263480	0.499135	264393	0.500865	3186	0.00603554	0	0	0	0	0	0	0	0	0	0	0	3099339397	237019319	30141805	29851755	0.990377	290050	0.00962285	10367	0.000343941	0.656989	9540	0.000316504	0.905765	79245	0.00262907	0	0	0.0129124	60
NZ72+76	GCTTGGAG	GCTTGGAG	0	0	0	0	0	0	576946	1	576946	0	0	288924	0.500782	288022	0.499218	1042	0.00180606	0	0	0	0	0	0	0	0	0	0	0	3099049968	237019319	33610478	33238555	0.988934	371923	0.0110657	14553	0.00043299	0.700474	13518	0.000402196	0.922474	51273	0.00152551	0	0	0.0134264	60
NZ72+76	GCTTGTCA	GCTTGTCA	0	0	0	0	0	0	382473	1	382473	0	0	191606	0.500966	190867	0.499034	930	0.00243154	0	0	0	0	0	0	0	0	0	0	0	3099174875	237019319	22194550	21951991	0.989071	242559	0.0109288	9091	0.000409605	0.694093	8239	0.000371217	0.918437	37904	0.00170781	0	0	0.0134174	60
NZ72+76	GTACGATC	GTACGATC	0	0	0	0	0	0	124776	1	124776	0	0	62799	0.503294	61977	0.496706	555	0.00444797	0	0	0	0	0	0	0	0	0	0	0	3097806491	237019319	7170421	7096405	0.989678	74016	0.0103224	2895	0.000403742	0.697409	2584	0.000360369	0.912152	16644	0.0023212	0	0	0.0134077	60
NZ72+76	GTACGCGA	GTACGCGA	0	0	0	0	0	0	424414	1	424414	0	0	212066	0.499668	212348	0.500332	1511	0.0035602	0	0	0	0	0	0	0	0	0	0	0	3099269963	237019419	24509929	24242374	0.989084	267555	0.0109162	10065	0.00041065	0.688525	8975	0.000366178	0.912869	49593	0.00202338	0	0	0.0137164	60
NZ72+76	GTACGGAT	GTACGGAT	0	0	0	0	0	0	298725	1	298725	0	0	149894	0.501779	148831	0.498221	1287	0.00430831	0	0	0	0	0	0	0	0	0	0	0	3098978218	237019319	17182947	16997748	0.989222	185199	0.0107781	6925	0.000403016	0.690542	6528	0.000379912	0.909467	39302	0.00228727	0	0	0.0138483	60
NZ72+76	GTACGTCG	GTACGTCG	0	0	0	0	0	0	384013	1	384013	0	0	192404	0.501035	191609	0.498965	1243	0.00323687	0	0	0	0	0	0	0	0	0	0	0	3099133619	237019319	22202346	21970430	0.989554	231916	0.0104456	8804	0.000396535	0.697297	8170	0.000367979	0.905875	42952	0.00193457	0	0	0.0131446	60
NZ72+76	GTCGTATC	GTCGTATC	0	0	0	0	0	0	289481	1	289481	0	0	145015	0.500948	144466	0.499052	910	0.00314356	0	0	0	0	0	0	0	0	0	0	0	3098378585	237019319	16757375	16586750	0.989818	170625	0.0101821	7079	0.000422441	0.688374	6235	0.000372075	0.916279	31712	0.00189242	0	0	0.012869	60
NZ72+76	GTCGTCGC	GTCGTCGC	0	0	0	0	0	0	354908	1	354908	0	0	177215	0.499327	177693	0.500673	688	0.00193853	0	0	0	0	0	0	0	0	0	0	0	3098828552	237019319	20664935	20437545	0.988996	227390	0.0110037	8327	0.000402953	0.68428	7520	0.000363901	0.913032	31954	0.00154629	0	0	0.0133168	60
NZ72+76	GTCGTGAA	GTCGTGAA	0	0	0	0	0	0	326109	1	326109	0	0	163196	0.500434	162913	0.499566	1297	0.0039772	0	0	0	0	0	0	0	0	0	0	0	3098609581	237019319	18762592	18555596	0.988968	206996	0.0110324	7321	0.000390191	0.685016	6637	0.000353736	0.912159	42736	0.00227772	0	0	0.014054	60
NZ72+76	GTCGTTCC	GTCGTTCC	0	0	0	0	0	0	119484	1	119484	0	0	59631	0.499071	59853	0.500929	244	0.00204211	0	0	0	0	0	0	0	0	0	0	0	3098261490	237019319	6939199	6844954	0.986418	94245	0.0135815	2812	0.000405234	0.700925	2546	0.000366901	0.911233	12362	0.00178147	0	0	0.0161351	60
NZ72+76	GTGCAATC	GTGCAATC	0	0	0	0	0	0	273664	1	273664	0	0	136598	0.499145	137066	0.500855	1152	0.00420954	0	0	0	0	0	0	0	0	0	0	0	3098680390	237019319	15716521	15554464	0.989689	162057	0.0103113	6318	0.000401997	0.689459	5688	0.000361912	0.911217	36759	0.00233888	0	0	0.013414	60
NZ72+76	GTGCACGA	GTGCACGA	0	0	0	0	0	0	385689	1	385689	0	0	192750	0.499755	192939	0.500245	1467	0.00380358	0	0	0	0	0	0	0	0	0	0	0	3099141835	237019319	22221249	21988615	0.989531	232634	0.010469	8660	0.000389717	0.683141	7847	0.00035313	0.914235	47002	0.00211518	0	0	0.013327	60
NZ72+76	TAGACATC	TAGACATC	0	0	0	0	0	0	698281	1	698281	0	0	349125	0.499978	349156	0.500022	2806	0.00401844	0	0	0	0	0	0	0	0	0	0	0	3099530978	237019319	40200157	39779394	0.989533	420763	0.0104667	16410	0.000408207	0.683181	14408	0.000358407	0.910605	88562	0.00220303	0	0	0.0134363	60
NZ72+76	TAGACCGA	TAGACCGA	0	0	0	0	0	0	833657	1	833657	0	0	417394	0.500678	416263	0.499322	2137	0.0025634	0	0	0	0	0	0	0	0	0	0	0	3099498491	237019319	48391799	47874511	0.98931	517288	0.0106896	20091	0.000415174	0.693395	17722	0.000366219	0.916996	82618	0.00170727	0	0	0.0131782	60
NZ72+76	TAGACGAT	TAGACGAT	0	0	0	0	0	0	559758	1	559758	0	0	279982	0.500184	279776	0.499816	1638	0.00292626	0	0	0	0	0	0	0	0	0	0	0	3099123095	237019319	32387159	32028270	0.988919	358889	0.0110812	13311	0.000410996	0.694613	11717	0.000361779	0.9138	61449	0.00189733	0	0	0.0137513	60
NZ72+76	TAGACTCG	TAGACTCG	0	0	0	0	0	0	357289	1	357289	0	0	178202	0.498762	179087	0.501238	739	0.00206835	0	0	0	0	0	0	0	0	0	0	0	3099081509	237019319	20782075	20552351	0.988946	229724	0.0110539	8307	0.000399719	0.680992	7499	0.00036084	0.919589	33086	0.00159205	0	0	0.0134066	60
NZ72+76	TAGGTCGC	TAGGTCGC	0	0	0	0	0	0	436853	1	436853	0	0	218395	0.499928	218458	0.500072	1904	0.00435845	0	0	0	0	0	0	0	0	0	0	0	3098804282	237019319	25166784	24906875	0.989673	259909	0.0103275	10161	0.000403746	0.678378	8701	0.000345733	0.904953	55501	0.00220533	0	0	0.0132823	60
NZ72+76	TAGGTGAG	TAGGTGAG	0	0	0	0	0	0	153317	1	153317	0	0	76821	0.50106	76496	0.49894	661	0.00431133	0	0	0	0	0	0	0	0	0	0	0	3098794757	237019319	8815013	8726575	0.989967	88438	0.0100327	3613	0.000409869	0.673402	3275	0.000371525	0.915115	20195	0.00229098	0	0	0.013105	60
NZ72+76	TAGGTTCA	TAGGTTCA	0	0	0	0	0	0	659399	1	659399	0	0	329867	0.500254	329532	0.499746	2559	0.00388081	0	0	0	0	0	0	0	0	0	0	0	3099123493	237019319	38047445	37658389	0.989774	389056	0.0102255	14962	0.000393246	0.680591	13628	0.000358184	0.91811	76959	0.00202271	0	0	0.0129997	60
NZ72+76	TCACACGC	TCACACGC	0	0	0	0	0	0	496164	1	496164	0	0	247970	0.499774	248194	0.500226	1365	0.00275111	0	0	0	0	0	0	0	0	0	0	0	3099032800	237019319	28792497	28490593	0.989514	301904	0.0104855	11345	0.000394026	0.686205	10319	0.000358392	0.91598	48455	0.0016829	0	0	0.0129208	60
NZ72+76	TCACAGAG	TCACAGAG	0	0	0	0	0	0	615354	1	615354	0	0	308389	0.501157	306965	0.498843	2089	0.00339479	0	0	0	0	0	0	0	0	0	0	0	3098984083	237019319	35544925	35175840	0.989616	369085	0.0103836	15164	0.000426615	0.66559	12872	0.000362133	0.912135	70053	0.00197083	0	0	0.0131432	60
NZ72+76	TCACATCA	TCACATCA	0	0	0	0	0	0	925146	1	925146	0	0	462273	0.499676	462873	0.500324	2944	0.0031822	0	0	0	0	0	0	0	0	0	0	0	3099396742	237019319	53474477	52882474	0.988929	592003	0.0110708	21614	0.000404193	0.698621	18519	0.000346315	0.912954	104557	0.00195527	0	0	0.0137765	60
NZ72+76	TCCGAATC	TCCGAATC	0	0	0	0	0	0	613516	1	613516	0	0	305960	0.498699	307556	0.501301	1897	0.00309201	0	0	0	0	0	0	0	0	0	0	0	3099284462	237019319	35486665	35105333	0.989254	381332	0.0107458	14498	0.000408548	0.689405	12445	0.000350695	0.911691	68620	0.00193368	0	0	0.0134387	60
NZ72+76	TCCGACGA	TCCGACGA	0	0	0	0	0	0	596546	1	596546	0	0	298960	0.501152	297586	0.498848	2395	0.00401478	0	0	0	0	0	0	0	0	0	0	0	3099232172	237019319	34400270	34089256	0.990959	311014	0.00904103	13762	0.000400055	0.680642	12736	0.00037023	0.919991	70307	0.00204379	0	0	0.0118551	60
NZ72+76	TCCGAGAT	TCCGAGAT	0	0	0	0	0	0	950983	1	950983	0	0	475177	0.499669	475806	0.500331	3772	0.00396642	0	0	0	0	0	0	0	0	0	0	0	3099763147	237019319	54716962	54129402	0.989262	587560	0.0107382	23897	0.000436738	0.66636	20370	0.000372279	0.916642	118068	0.0021578	0	0	0.013705	60
NZ72+76	TCCGATCG	TCCGATCG	0	0	0	0	0	0	879676	1	879676	0	0	440194	0.500405	439482	0.499595	2823	0.00320914	0	0	0	0	0	0	0	0	0	0	0	3099404026	237019319	50881075	50351748	0.989597	529327	0.0104032	21052	0.000413749	0.684638	18631	0.000366168	0.916913	97572	0.00191765	0	0	0.0131008	60
NZ72+76	TGATGATC	TGATGATC	0	0	0	0	0	0	338899	1	338899	0	0	169055	0.498836	169844	0.501164	1066	0.00314548	0	0	0	0	0	0	0	0	0	0	0	3099225673	237019319	19616359	19419262	0.989952	197097	0.0100476	7976	0.000406599	0.688064	7193	0.000366684	0.913805	36692	0.00187048	0	0	0.0126913	60
NZ72+76	TGATGCGC	TGATGCGC	0	0	0	0	0	0	703379	1	703379	0	0	351658	0.499955	351721	0.500045	2484	0.00353152	0	0	0	0	0	0	0	0	0	0	0	3099366344	237019319	40640955	40230805	0.989908	410150	0.010092	16451	0.000404789	0.683363	14721	0.000362221	0.914883	80096	0.00197082	0	0	0.0128299	60
NZ72+76	TGATGGAA	TGATGGAA	0	0	0	0	0	0	438436	1	438436	0	0	219318	0.500228	219118	0.499772	2236	0.00509995	0	0	0	0	0	0	0	0	0	0	0	3099511705	237019319	25109422	24843209	0.989398	266213	0.0106021	9846	0.000392124	0.677839	9071	0.000361259	0.915996	63149	0.00251495	0	0	0.0138705	60
NZ72+76	TGATGTCC	TGATGTCC	0	0	0	0	0	0	792221	1	792221	0	0	395343	0.499031	396878	0.500969	2251	0.00284138	0	0	0	0	0	0	0	0	0	0	0	3099505600	237019319	45932069	45413664	0.988714	518405	0.0112863	18914	0.000411782	0.694142	16613	0.000361686	0.914043	82455	0.00179515	0	0	0.013855	60
NZ72+76	TGCATATC	TGCATATC	0	0	0	0	0	0	656100	1	656100	0	0	328572	0.500796	327528	0.499204	2152	0.00327999	0	0	0	0	0	0	0	0	0	0	0	3099192460	237019319	37932113	37533047	0.989479	399066	0.0105205	15636	0.00041221	0.695382	13329	0.000351391	0.917548	74550	0.00196535	0	0	0.0132495	60
NZ72+76	TGCATCGA	TGCATCGA	0	0	0	0	0	0	362484	1	362484	0	0	181109	0.499633	181375	0.500367	1495	0.00412432	0	0	0	0	0	0	0	0	0	0	0	3098958757	237019319	20865026	20648714	0.989633	216312	0.0103672	7132	0.000341816	0.659563	6471	0.000310136	0.902179	45151	0.00216396	0	0	0.0131831	60
NZ72+76	TGCATGAT	TGCATGAT	0	0	0	0	0	0	514129	1	514129	0	0	257125	0.500118	257004	0.499882	1326	0.00257912	0	0	0	0	0	0	0	0	0	0	0	3098518440	237019319	29326244	29032633	0.989988	293611	0.0100119	12158	0.000414577	0.684159	11260	0.000383956	0.879751	119285	0.00406752	0	0	0.0148779	60
NZ72+76	TGCATTCG	TGCATTCG	0	0	0	0	0	0	536925	1	536925	0	0	268510	0.500088	268415	0.499912	1487	0.00276947	0	0	0	0	0	0	0	0	0	0	0	3099286364	237019319	31112924	30796891	0.989842	316033	0.0101576	12459	0.000400445	0.697889	11199	0.000359947	0.910974	55974	0.00179906	0	0	0.0127171	60
NZ72+76	TGTACATC	TGTACATC	0	0	0	0	0	0	443284	1	443284	0	0	221817	0.500395	221467	0.499605	2091	0.00471707	0	0	0	0	0	0	0	0	0	0	0	3099536064	237019319	25404762	25136447	0.989438	268315	0.0105616	11650	0.000458575	0.634936	9056	0.000356469	0.912875	63729	0.00250855	0	0	0.0138852	60
NZ72+76	TGTACCGA	TGTACCGA	0	0	0	0	0	0	259920	1	259920	0	0	129968	0.500031	129952	0.499969	1010	0.00388581	0	0	0	0	0	0	0	0	0	0	0	3099041176	237019319	14980491	14792085	0.987423	188406	0.0125768	5966	0.000398251	0.701475	5202	0.000347252	0.911572	32451	0.00216622	0	0	0.0154885	60
NZ73+77	ACAGTATC	ACAGTATC	0	0	0	0	0	0	256372	1	256372	0	0	127900	0.498884	128472	0.501116	918	0.00358073	0	0	0	0	0	0	0	0	0	0	0	3098472266	237019319	14867618	14725229	0.990423	142389	0.00957712	5574	0.000374909	0.680122	4882	0.000328365	0.918681	25620	0.00172321	0	0	0.0120036	60
NZ73+77	ACAGTCGA	ACAGTCGA	0	0	0	0	0	0	360755	1	360755	0	0	179996	0.498942	180759	0.501058	1184	0.00328201	0	0	0	0	0	0	0	0	0	0	0	3098905801	237019319	20988888	20769144	0.98953	219744	0.0104695	8441	0.000402165	0.691387	7699	0.000366813	0.916613	32606	0.00155349	0	0	0.012792	60
NZ73+77	ACGACATC	ACGACATC	0	0	0	0	0	0	563416	1	563416	0	0	281992	0.500504	281424	0.499496	2189	0.00388523	0	0	0	0	0	0	0	0	0	0	0	3099481822	237019319	32688885	32365561	0.990109	323324	0.00989095	13348	0.000408335	0.690965	11689	0.000357583	0.914449	55716	0.00170443	0	0	0.0123613	60
NZ73+77	ACGACCGC	ACGACCGC	0	0	0	0	0	0	390798	1	390798	0	0	195101	0.499237	195697	0.500763	1815	0.00464434	0	0	0	0	0	0	0	0	0	0	0	3098942634	237019319	22570606	22347164	0.9901	223442	0.00989969	9365	0.00041492	0.666951	7905	0.000350234	0.912966	44505	0.00197181	0	0	0.0126367	60
NZ73+77	ACGACGAA	ACGACGAA	0	0	0	0	0	0	399847	1	399847	0	0	200036	0.500281	199811	0.499719	1411	0.00352885	0	0	0	0	0	0	0	0	0	0	0	3098746802	237019319	23195723	22956775	0.989699	238948	0.0103014	9748	0.00042025	0.709376	8966	0.000386537	0.924716	39928	0.00172135	0	0	0.0128295	60
NZ73+77	ACGACTCC	ACGACTCC	0	0	0	0	0	0	363813	1	363813	0	0	181560	0.499048	182253	0.500952	1479	0.00406528	0	0	0	0	0	0	0	0	0	0	0	3098962663	237019319	21069374	20855213	0.989835	214161	0.0101646	8280	0.000392987	0.691546	7112	0.000337552	0.917885	38306	0.00181809	0	0	0.0127132	60
NZ73+77	ACTGAATC	ACTGAATC	0	0	0	0	0	0	690557	1	690557	0	0	345174	0.499849	345383	0.500151	2716	0.00393306	0	0	0	0	0	0	0	0	0	0	0	3099456162	237019419	40007711	39620171	0.990313	387540	0.00968663	14773	0.000369254	0.63968	12047	0.000301117	0.909023	70399	0.00175964	0	0	0.0121166	60
NZ73+77	ACTGACGA	ACTGACGA	0	0	0	0	0	0	394327	1	394327	0	0	196477	0.498259	197850	0.501741	1399	0.00354782	0	0	0	0	0	0	0	0	0	0	0	3098916713	237019319	22891009	22656189	0.989742	234820	0.0102582	8899	0.000388755	0.685807	8244	0.000360141	0.919699	38084	0.00166371	0	0	0.0126708	60
NZ73+77	ACTGAGAT	ACTGAGAT	0	0	0	0	0	0	226976	1	226976	0	0	113500	0.500053	113476	0.499947	948	0.00417665	0	0	0	0	0	0	0	0	0	0	0	3098841176	237019319	13137444	13014044	0.990607	123400	0.009393	5312	0.00040434	0.690136	4589	0.000349307	0.913271	23939	0.0018222	0	0	0.0119688	60
NZ73+77	ACTGATCG	ACTGATCG	0	0	0	0	0	0	427960	1	427960	0	0	213850	0.499696	214110	0.500304	1608	0.00375736	0	0	0	0	0	0	0	0	0	0	0	3099382949	237019319	24812534	24566091	0.990068	246443	0.0099322	9780	0.000394156	0.688344	8518	0.000343294	0.912538	43394	0.00174887	0	0	0.0124185	60
NZ73+77	AGCCACGC	AGCCACGC	0	0	0	0	0	0	1070342	1	1070342	0	0	534951	0.499794	535391	0.500206	3180	0.00297101	0	0	0	0	0	0	0	0	0	0	0	3099131329	237019319	62296146	61706439	0.990534	589707	0.00946619	26700	0.000428598	0.709663	24382	0.000391389	0.927446	92327	0.00148207	0	0	0.0117682	60
NZ73+77	AGCCAGAG	AGCCAGAG	0	0	0	0	0	0	1222580	1	1222580	0	0	609819	0.498797	612761	0.501203	4163	0.00340509	0	0	0	0	0	0	0	0	0	0	0	3099766336	237019319	71127612	70444165	0.990391	683447	0.00960874	29342	0.000412526	0.69559	26436	0.00037167	0.922341	107210	0.00150729	0	0	0.0119002	60
NZ73+77	AGCCATCA	AGCCATCA	0	0	0	0	0	0	967865	1	967865	0	0	482799	0.498829	485066	0.501171	3410	0.00352322	0	0	0	0	0	0	0	0	0	0	0	3099273655	237019319	56188004	55626921	0.990014	561083	0.00998581	21424	0.000381291	0.688714	19509	0.000347209	0.912194	91913	0.00163581	0	0	0.0123501	60
NZ73+77	AGCGTATC	AGCGTATC	0	0	0	0	0	0	830676	1	830676	0	0	415644	0.500368	415032	0.499632	2777	0.00334306	0	0	0	0	0	0	0	0	0	0	0	3099374433	237019319	48312499	47852175	0.990472	460324	0.00952805	19160	0.000396585	0.689614	16989	0.000351648	0.922185	73290	0.001517	0	0	0.0117933	60
NZ73+77	AGCGTCGA	AGCGTCGA	0	0	0	0	0	0	524884	1	524884	0	0	261513	0.49823	263371	0.50177	1666	0.00317403	0	0	0	0	0	0	0	0	0	0	0	3099206623	237019319	30500559	30186614	0.989707	313945	0.0102931	11565	0.000379173	0.679377	10643	0.000348944	0.912525	48161	0.00157902	0	0	0.0126002	60
NZ73+77	AGCGTGAT	AGCGTGAT	0	0	0	0	0	0	1093350	1	1093350	0	0	545995	0.499378	547355	0.500622	2009	0.00183747	0	0	0	0	0	0	0	0	0	0	0	3099549271	237019319	64006193	63385782	0.990307	620411	0.00969298	29162	0.000455612	0.705816	26030	0.000406679	0.923627	73562	0.0011493	0	0	0.0117046	60
NZ73+77	AGCGTTCG	AGCGTTCG	0	0	0	0	0	0	559136	1	559136	0	0	279826	0.500461	279310	0.499539	2175	0.00388993	0	0	0	0	0	0	0	0	0	0	0	3098769954	237019319	32434361	32121553	0.990356	312808	0.00964434	12707	0.000391776	0.703392	11574	0.000356844	0.920857	54856	0.00169129	0	0	0.0120843	60
NZ73+77	ATGTGCGC	ATGTGCGC	0	0	0	0	0	0	741557	1	741557	0	0	370794	0.500021	370763	0.499979	2673	0.00360458	0	0	0	0	0	0	0	0	0	0	0	3099484958	237019319	43029456	42628791	0.990689	400665	0.00931141	17472	0.000406047	0.689904	15810	0.000367423	0.917331	72534	0.00168568	0	0	0.0117706	60
NZ73+77	ATGTGGAG	ATGTGGAG	0	0	0	0	0	0	3880	1	3880	0	0	1975	0.509021	1905	0.490979	25	0.0064433	0	0	0	0	0	0	0	0	0	0	0	3036665113	200630282	219988	217732	0.989745	2256	0.0102551	109	0.000495482	0.761468	73	0.000331836	0.90411	727	0.00330473	0	0	0.0143871	60
NZ73+77	ATGTGTCA	ATGTGTCA	0	0	0	0	0	0	325192	1	325192	0	0	162631	0.500108	162561	0.499892	1334	0.00410219	0	0	0	0	0	0	0	0	0	0	0	3099009792	237019319	18816769	18629740	0.990061	187029	0.00993949	7552	0.000401344	0.688559	6749	0.000358669	0.91495	34926	0.00185611	0	0	0.0125556	60
NZ73+77	ATTCGATC	ATTCGATC	0	0	0	0	0	0	980004	1	980004	0	0	491172	0.501194	488832	0.498806	3405	0.00347448	0	0	0	0	0	0	0	0	0	0	0	3099443781	237019319	56925275	56392531	0.990641	532744	0.00935865	22759	0.000399805	0.685487	20312	0.000356819	0.920835	90775	0.00159463	0	0	0.0117099	60
NZ73+77	ATTCGCGA	ATTCGCGA	0	0	0	0	0	0	1007031	1	1007031	0	0	503218	0.499705	503813	0.500295	2518	0.00250042	0	0	0	0	0	0	0	0	0	0	0	3099487031	237019319	58740299	58169605	0.990284	570694	0.00971554	24665	0.000419899	0.707075	23093	0.000393137	0.923527	80264	0.00136642	0	0	0.011895	60
NZ73+77	ATTCGGAT	ATTCGGAT	0	0	0	0	0	0	1157828	1	1157828	0	0	577610	0.498874	580218	0.501126	3613	0.0031205	0	0	0	0	0	0	0	0	0	0	0	3100076345	237019319	67363475	66691995	0.990032	671480	0.00996801	25882	0.000384214	0.690557	23468	0.000348379	0.919252	101743	0.00151036	0	0	0.012211	60
NZ73+77	ATTCGTCG	ATTCGTCG	0	0	0	0	0	0	803318	1	803318	0	0	402184	0.500654	401134	0.499346	2663	0.003315	0	0	0	0	0	0	0	0	0	0	0	3099285932	237019319	46726427	46256289	0.989938	470138	0.0100615	18491	0.000395729	0.683792	16208	0.00034687	0.918806	71766	0.00153588	0	0	0.01234	60
NZ73+77	CACTGATC	CACTGATC	0	0	0	0	0	0	290054	1	290054	0	0	145316	0.500996	144738	0.499004	1307	0.00450606	0	0	0	0	0	0	0	0	0	0	0	3098859710	237019319	16773737	16615480	0.990565	158257	0.00943481	6512	0.000388226	0.676904	5677	0.000338446	0.913863	31435	0.00187406	0	0	0.0120355	60
NZ73+77	CACTGCGA	CACTGCGA	0	0	0	0	0	0	301602	1	301602	0	0	151037	0.500782	150565	0.499218	1367	0.00453246	0	0	0	0	0	0	0	0	0	0	0	3098863417	237019319	17444261	17269072	0.989957	175189	0.0100428	6586	0.000377545	0.697388	6191	0.000354902	0.920045	32774	0.00187878	0	0	0.012654	60
NZ73+77	CAGTCATC	CAGTCATC	0	0	0	0	0	0	1093959	1	1093959	0	0	545507	0.498654	548452	0.501346	4161	0.00380362	0	0	0	0	0	0	0	0	0	0	0	3099273655	237019319	63492504	62884875	0.99043	607629	0.00957009	25216	0.000397149	0.688769	22138	0.000348671	0.910922	105092	0.00165519	0	0	0.0119711	60
NZ73+77	CAGTCCGA	CAGTCCGA	0	0	0	0	0	0	319263	1	319263	0	0	159767	0.500424	159496	0.499576	1252	0.00392153	0	0	0	0	0	0	0	0	0	0	0	3098590162	237019319	18495570	18306908	0.9898	188662	0.0102004	7143	0.000386201	0.682486	6612	0.000357491	0.916364	33124	0.00179092	0	0	0.012735	60
NZ73+77	CAGTCGAT	CAGTCGAT	0	0	0	0	0	0	308800	1	308800	0	0	154708	0.500997	154092	0.499003	1285	0.00416127	0	0	0	0	0	0	0	0	0	0	0	3098778782	237019319	17916694	17761200	0.991321	155494	0.00867872	6794	0.000379199	0.683691	6278	0.000350399	0.9108	29699	0.00165762	0	0	0.0110659	60
NZ73+77	CAGTCTCG	CAGTCTCG	0	0	0	0	0	0	214550	1	214550	0	0	106941	0.498443	107609	0.501557	403	0.00187835	0	0	0	0	0	0	0	0	0	0	0	3098131719	237019319	12539345	12405512	0.989327	133833	0.010673	5427	0.000432798	0.719182	4924	0.000392684	0.919171	16069	0.00128149	0	0	0.01278	60
NZ73+77	CATCAATC	CATCAATC	0	0	0	0	0	0	230246	1	230246	0	0	114555	0.497533	115691	0.502467	396	0.0017199	0	0	0	0	0	0	0	0	0	0	0	3098277321	237019319	13448287	13307252	0.989513	141035	0.0104872	6034	0.000448682	0.735996	5518	0.000410312	0.921711	17542	0.0013044	0	0	0.0126506	60
NZ73+77	CATCACGC	CATCACGC	0	0	0	0	0	0	675492	1	675492	0	0	337156	0.499127	338336	0.500873	2778	0.00411256	0	0	0	0	0	0	0	0	0	0	0	3099257612	237019319	39130766	38751096	0.990297	379670	0.0097026	15292	0.000390792	0.690492	13726	0.000350773	0.919059	69326	0.00177165	0	0	0.0122158	60
NZ73+77	CATCAGAA	CATCAGAA	0	0	0	0	0	0	473717	1	473717	0	0	236763	0.499798	236954	0.500202	2183	0.00460824	0	0	0	0	0	0	0	0	0	0	0	3098863781	237019319	27361884	27087659	0.989978	274225	0.0100222	10443	0.000381662	0.685531	9665	0.000353229	0.923228	53311	0.00194837	0	0	0.0127054	60
NZ73+77	CATCATCC	CATCATCC	0	0	0	0	0	0	280360	1	280360	0	0	140570	0.501391	139790	0.498609	442	0.00157654	0	0	0	0	0	0	0	0	0	0	0	3098536369	237019319	16388183	16206489	0.988913	181694	0.0110869	7215	0.000440256	0.712405	6471	0.000394858	0.930304	20796	0.00126896	0	0	0.013191	60
NZ73+77	CGGATATC	CGGATATC	0	0	0	0	0	0	147612	1	147612	0	0	73957	0.501023	73655	0.498977	655	0.00443731	0	0	0	0	0	0	0	0	0	0	0	3098944690	237019319	8531490	8451287	0.990599	80203	0.00940082	3408	0.000399461	0.688087	3085	0.000361602	0.927066	16383	0.0019203	0	0	0.0120822	60
NZ73+77	CGGATCGA	CGGATCGA	0	0	0	0	0	0	985137	1	985137	0	0	492727	0.500161	492410	0.499839	3081	0.00312748	0	0	0	0	0	0	0	0	0	0	0	3099534559	237019319	57314975	56740475	0.989976	574500	0.0100236	22708	0.000396197	0.686058	20581	0.000359086	0.920801	86353	0.00150664	0	0	0.0122855	60
NZ73+77	CGGATGAT	CGGATGAT	0	0	0	0	0	0	72832	1	72832	0	0	36359	0.499217	36473	0.500783	299	0.00410534	0	0	0	0	0	0	0	0	0	0	0	3097978537	237019319	4209072	4168830	0.990439	40242	0.00956078	1650	0.00039201	0.690909	1402	0.00033309	0.912981	8127	0.00193083	0	0	0.0122167	60
NZ73+77	CGGATTCG	CGGATTCG	0	0	0	0	0	0	543072	1	543072	0	0	270884	0.498799	272188	0.501201	1117	0.00205682	0	0	0	0	0	0	0	0	0	0	0	3098907512	237019319	31688161	31335732	0.988878	352429	0.0111218	13399	0.000422839	0.715203	12472	0.000393585	0.921264	43207	0.00136351	0	0	0.0133017	60
NZ73+77	CGTGTCGC	CGTGTCGC	0	0	0	0	0	0	586818	1	586818	0	0	292806	0.498972	294012	0.501028	2183	0.00372006	0	0	0	0	0	0	0	0	0	0	0	3099474757	237019319	34048173	33720165	0.990366	328008	0.00963364	13334	0.000391622	0.687566	12049	0.000353881	0.9224	57238	0.00168109	0	0	0.0120602	60
NZ73+77	CGTGTGAG	CGTGTGAG	0	0	0	0	0	0	723700	1	723700	0	0	361374	0.499342	362326	0.500658	2816	0.00389112	0	0	0	0	0	0	0	0	0	0	0	3099395105	237019319	41981801	41577570	0.990371	404231	0.00962872	16403	0.000390717	0.688472	15323	0.000364991	0.916726	70486	0.00167897	0	0	0.0120634	60
NZ73+77	CGTGTTCA	CGTGTTCA	0	0	0	0	0	0	520406	1	520406	0	0	260074	0.499752	260332	0.500248	2018	0.00387774	0	0	0	0	0	0	0	0	0	0	0	3099345476	237019319	30160101	29855395	0.989897	304706	0.010103	12157	0.000403082	0.694826	10854	0.000359879	0.923623	52805	0.00175082	0	0	0.0126167	60
NZ73+77	CTAACCGC	CTAACCGC	0	0	0	0	0	0	1011249	1	1011249	0	0	506624	0.500988	504625	0.499012	2864	0.00283214	0	0	0	0	0	0	0	0	0	0	0	3099300925	237019319	58950397	58366015	0.990087	584382	0.00991311	24524	0.000416011	0.697969	21020	0.000356571	0.914177	83946	0.00142401	0	0	0.0121097	60
NZ73+77	CTAACGAG	CTAACGAG	0	0	0	0	0	0	1276179	1	1276179	0	0	638859	0.500603	637320	0.499397	4418	0.0034619	0	0	0	0	0	0	0	0	0	0	0	3099845149	237019319	74097981	73370260	0.990179	727721	0.00982106	29498	0.000398095	0.694115	26328	0.000355313	0.920199	120732	0.00162936	0	0	0.0122038	60
NZ73+77	CTAACTCA	CTAACTCA	0	0	0	0	0	0	813180	1	813180	0	0	406602	0.500015	406578	0.499985	2784	0.0034236	0	0	0	0	0	0	0	0	0	0	0	3099387911	237019319	47198978	46714193	0.989729	484785	0.0102711	18725	0.000396725	0.691909	16081	0.000340707	0.92059	78327	0.00165951	0	0	0.012668	60
NZ73+77	CTATGATC	CTATGATC	0	0	0	0	0	0	758550	1	758550	0	0	379094	0.499761	379456	0.500239	870	0.00114693	0	0	0	0	0	0	0	0	0	0	0	3099061510	237019319	44482794	44032493	0.989877	450301	0.010123	19284	0.000433516	0.718056	17807	0.000400312	0.925142	47516	0.00106819	0	0	0.0120251	60
NZ73+77	CTATGCGA	CTATGCGA	0	0	0	0	0	0	931606	1	931606	0	0	465383	0.499549	466223	0.500451	3496	0.00375266	0	0	0	0	0	0	0	0	0	0	0	3099651795	237019319	54057946	53525016	0.990142	532930	0.0098585	20512	0.000379445	0.686135	19075	0.000352862	0.918427	89570	0.00165693	0	0	0.0122477	60
NZ73+77	CTATGGAT	CTATGGAT	0	0	0	0	0	0	1048177	1	1048177	0	0	522522	0.498506	525655	0.501494	3972	0.00378944	0	0	0	0	0	0	0	0	0	0	0	3099525513	237019319	60845563	60241919	0.990079	603644	0.00992092	24112	0.000396282	0.689117	21462	0.000352729	0.9145	99884	0.0016416	0	0	0.0123115	60
NZ73+77	CTATGTCG	CTATGTCG	0	0	0	0	0	0	1181550	1	1181550	0	0	592250	0.501248	589300	0.498752	2127	0.00180018	0	0	0	0	0	0	0	0	0	0	0	3099319756	237019319	69182352	68514458	0.990346	667894	0.00965411	30119	0.000435357	0.711179	27243	0.000393785	0.922072	80519	0.00116387	0	0	0.0116471	60
NZ73+77	GAATCATC	GAATCATC	0	0	0	0	0	0	857968	1	857968	0	0	429266	0.500329	428702	0.499671	2946	0.00343369	0	0	0	0	0	0	0	0	0	0	0	3099478156	237019419	49817147	49307303	0.989766	509844	0.0102343	19680	0.000395045	0.686687	17312	0.000347511	0.918842	81395	0.00163388	0	0	0.0126107	60
NZ73+77	GAATCCGA	GAATCCGA	0	0	0	0	0	0	780083	1	780083	0	0	390297	0.500328	389786	0.499672	2555	0.00327529	0	0	0	0	0	0	0	0	0	0	0	3099366344	237019319	45347504	44907424	0.990295	440080	0.00970461	18097	0.000399074	0.694535	15434	0.000340349	0.916483	70187	0.00154776	0	0	0.0119918	60
NZ73+77	GAATCGAT	GAATCGAT	0	0	0	0	0	0	888902	1	888902	0	0	443089	0.498468	445813	0.501532	3138	0.0035302	0	0	0	0	0	0	0	0	0	0	0	3099461670	237019419	51617942	51099177	0.98995	518765	0.0100501	20542	0.000397962	0.694188	18061	0.000349898	0.916616	84006	0.00162746	0	0	0.0124254	60
NZ73+77	GAATCTCG	GAATCTCG	0	0	0	0	0	0	867745	1	867745	0	0	433972	0.500115	433773	0.499885	3011	0.00346991	0	0	0	0	0	0	0	0	0	0	0	3099282634	237019319	50371285	49866463	0.989978	504822	0.010022	18929	0.000375789	0.688045	17270	0.000342854	0.920672	82114	0.00163017	0	0	0.0123708	60
NZ73+77	GACACCGC	GACACCGC	0	0	0	0	0	0	910443	1	910443	0	0	455158	0.49993	455285	0.50007	3243	0.003562	0	0	0	0	0	0	0	0	0	0	0	3099684107	237019319	52837390	52320190	0.990211	517200	0.00978852	21106	0.000399452	0.68952	18900	0.000357701	0.914339	88319	0.00167152	0	0	0.0122172	60
NZ73+77	GACACGAG	GACACGAG	0	0	0	0	0	0	1121330	1	1121330	0	0	559449	0.498916	561881	0.501084	4019	0.00358414	0	0	0	0	0	0	0	0	0	0	0	3099924858	237019319	65109402	64465235	0.990106	644167	0.00989361	25703	0.000394766	0.69665	23947	0.000367796	0.920658	105957	0.00162737	0	0	0.0122835	60
NZ73+77	GACACTCA	GACACTCA	0	0	0	0	0	0	941267	1	941267	0	0	470176	0.499514	471091	0.500486	3443	0.00365784	0	0	0	0	0	0	0	0	0	0	0	3099226636	237019319	54617838	54055020	0.989695	562818	0.0103047	22095	0.000404538	0.696764	19719	0.000361036	0.91531	92317	0.00169024	0	0	0.0127605	60
NZ73+77	GCTCAATC	GCTCAATC	0	0	0	0	0	0	31481	1	31481	0	0	15741	0.500016	15740	0.499984	149	0.00473301	0	0	0	0	0	0	0	0	0	0	0	3038034076	200630282	1815792	1798404	0.990424	17388	0.00957599	664	0.000365681	0.682229	625	0.000344202	0.8928	3726	0.002052	0	0	0.0123379	60
NZ73+77	GCTCACGA	GCTCACGA	0	0	0	0	0	0	813834	1	813834	0	0	406593	0.499602	407241	0.500398	1976	0.00242801	0	0	0	0	0	0	0	0	0	0	0	3099362336	237019319	47380009	46850101	0.988816	529908	0.0111842	25510	0.000538413	0.597922	17414	0.000367539	0.91392	73215	0.00154527	0	0	0.0136354	60
NZ73+77	GCTCAGAT	GCTCAGAT	0	0	0	0	0	0	40994	1	40994	0	0	20519	0.500537	20475	0.499463	193	0.00470801	0	0	0	0	0	0	0	0	0	0	0	3097931118	237019319	2362061	2339114	0.990285	22947	0.00971482	979	0.000414469	0.699694	860	0.000364089	0.911628	4975	0.00210621	0	0	0.0125996	60
NZ73+77	GCTCATCG	GCTCATCG	0	0	0	0	0	0	760284	1	760284	0	0	379872	0.499645	380412	0.500355	2843	0.00373939	0	0	0	0	0	0	0	0	0	0	0	3099406286	237019319	44102144	43673643	0.990284	428501	0.0097161	17350	0.000393405	0.687666	15115	0.000342727	0.914059	74501	0.00168928	0	0	0.0121415	60
NZ73+77	GCTTGCGC	GCTTGCGC	0	0	0	0	0	0	513053	1	513053	0	0	256619	0.50018	256434	0.49982	2214	0.00431534	0	0	0	0	0	0	0	0	0	0	0	3098967329	237019319	29675102	29401170	0.990769	273932	0.00923104	11744	0.000395753	0.690395	10571	0.000356225	0.917226	54713	0.00184373	0	0	0.0118267	60
NZ73+77	GCTTGGAG	GCTTGGAG	0	0	0	0	0	0	753369	1	753369	0	0	375729	0.498732	377640	0.501268	3227	0.00428343	0	0	0	0	0	0	0	0	0	0	0	3099331870	237019319	43608812	43209151	0.990835	399661	0.00916468	16960	0.000388912	0.695755	15636	0.000358551	0.917882	79073	0.00181323	0	0	0.0117254	60
NZ73+77	GCTTGTCA	GCTTGTCA	0	0	0	0	0	0	566389	1	566389	0	0	282988	0.499635	283401	0.500365	1647	0.0029079	0	0	0	0	0	0	0	0	0	0	0	3099368188	237019419	33006244	32676613	0.990013	329631	0.00998693	13494	0.000408832	0.696309	11626	0.000352236	0.918717	47127	0.00142782	0	0	0.0121758	60
NZ73+77	GTACGATC	GTACGATC	0	0	0	0	0	0	96547	1	96547	0	0	48318	0.500461	48229	0.499539	491	0.00508561	0	0	0	0	0	0	0	0	0	0	0	3098546753	237019319	5568649	5515986	0.990543	52663	0.00945705	2136	0.000383576	0.689139	1892	0.000339759	0.925476	11346	0.00203748	0	0	0.0122179	60
NZ73+77	GTACGCGA	GTACGCGA	0	0	0	0	0	0	390020	1	390020	0	0	195047	0.500095	194973	0.499905	1833	0.00469976	0	0	0	0	0	0	0	0	0	0	0	3098983662	237019319	22542668	22319449	0.990098	223219	0.00990207	8658	0.000384072	0.685955	8068	0.000357899	0.92179	43116	0.00191264	0	0	0.0125567	60
NZ73+77	GTACGGAT	GTACGGAT	0	0	0	0	0	0	277763	1	277763	0	0	138661	0.499206	139102	0.500794	1198	0.00431303	0	0	0	0	0	0	0	0	0	0	0	3099234433	237019319	16073239	15914126	0.990101	159113	0.00989925	6232	0.000387725	0.682445	5699	0.000354565	0.91946	29593	0.00184113	0	0	0.0124827	60
NZ73+77	GTACGTCG	GTACGTCG	0	0	0	0	0	0	315683	1	315683	0	0	158130	0.500914	157553	0.499086	586	0.00185629	0	0	0	0	0	0	0	0	0	0	0	3098188899	237019319	18457067	18276377	0.99021	180690	0.00978975	8250	0.000446983	0.707636	7414	0.000401689	0.922309	22960	0.00124397	0	0	0.0118824	60
NZ73+77	GTCGTATC	GTCGTATC	0	0	0	0	0	0	255308	1	255308	0	0	127941	0.501124	127367	0.498876	1161	0.00454745	0	0	0	0	0	0	0	0	0	0	0	3098782441	237019319	14752086	14615566	0.990746	136520	0.00925428	5705	0.000386725	0.696757	5209	0.000353103	0.915915	28293	0.0019179	0	0	0.011912	60
NZ73+77	GTCGTCGC	GTCGTCGC	0	0	0	0	0	0	376954	1	376954	0	0	188532	0.500146	188422	0.499854	1555	0.00412517	0	0	0	0	0	0	0	0	0	0	0	3098828552	237019319	21806036	21596006	0.990368	210030	0.00963174	8524	0.000390901	0.673979	7661	0.000351325	0.922595	40626	0.00186306	0	0	0.012237	60
NZ73+77	GTCGTGAA	GTCGTGAA	0	0	0	0	0	0	137285	1	137285	0	0	69043	0.502917	68242	0.497083	263	0.00191572	0	0	0	0	0	0	0	0	0	0	0	3098230618	237019319	8008832	7922271	0.989192	86561	0.0108082	3344	0.000417539	0.695574	3091	0.000385949	0.924943	11329	0.00141456	0	0	0.0130262	60
NZ73+77	GTCGTTCC	GTCGTTCC	0	0	0	0	0	0	265309	1	265309	0	0	132400	0.499041	132909	0.500959	1353	0.00509971	0	0	0	0	0	0	0	0	0	0	0	3099184026	237019319	15283678	15137052	0.990406	146626	0.00959363	5117	0.000334802	0.662888	4740	0.000310135	0.921308	32146	0.00210329	0	0	0.0123419	60
NZ73+77	GTGCAATC	GTGCAATC	0	0	0	0	0	0	288103	1	288103	0	0	144097	0.500158	144006	0.499842	1265	0.00439079	0	0	0	0	0	0	0	0	0	0	0	3099355122	237019319	16657356	16501541	0.990646	155815	0.00935413	6470	0.000388417	0.687172	5741	0.000344653	0.911688	31302	0.00187917	0	0	0.0119664	60
NZ73+77	GTGCACGA	GTGCACGA	0	0	0	0	0	0	306351	1	306351	0	0	152736	0.498565	153615	0.501435	1266	0.00413251	0	0	0	0	0	0	0	0	0	0	0	3099367201	237019319	17736007	17560762	0.990119	175245	0.00988075	6822	0.000384641	0.697743	6274	0.000353744	0.922856	32007	0.00180463	0	0	0.0124238	60
NZ73+77	TAGACATC	TAGACATC	0	0	0	0	0	0	984690	1	984690	0	0	493369	0.50104	491321	0.49896	3261	0.0033117	0	0	0	0	0	0	0	0	0	0	0	3099800743	237019319	57228201	56665865	0.990174	562336	0.0098262	22706	0.000396762	0.693914	20115	0.000351488	0.917872	90004	0.00157272	0	0	0.0121472	60
NZ73+77	TAGACCGA	TAGACCGA	0	0	0	0	0	0	902487	1	902487	0	0	450411	0.499078	452076	0.500922	3576	0.00396238	0	0	0	0	0	0	0	0	0	0	0	3099572758	237019319	52290082	51777191	0.990191	512891	0.00980857	19403	0.000371065	0.680616	18206	0.000348173	0.919642	91386	0.00174767	0	0	0.0122755	60
NZ73+77	TAGACGAT	TAGACGAT	0	0	0	0	0	0	1232283	1	1232283	0	0	616133	0.499993	616150	0.500007	4746	0.00385139	0	0	0	0	0	0	0	0	0	0	0	3099171773	237019319	71460707	70763428	0.990242	697279	0.00975752	28376	0.000397085	0.68491	24697	0.000345603	0.915293	121822	0.00170474	0	0	0.0122049	60
NZ73+77	TAGACTCG	TAGACTCG	0	0	0	0	0	0	359192	1	359192	0	0	179224	0.498964	179968	0.501036	1788	0.00497784	0	0	0	0	0	0	0	0	0	0	0	3099239196	237019319	20696586	20489922	0.990015	206664	0.00998541	8123	0.00039248	0.663179	6802	0.000328653	0.916789	43730	0.00211291	0	0	0.0128195	60
NZ73+77	TAGGTCGC	TAGGTCGC	0	0	0	0	0	0	289138	1	289138	0	0	144556	0.499955	144582	0.500045	1307	0.00452033	0	0	0	0	0	0	0	0	0	0	0	3098901973	237019319	16703094	16543364	0.990437	159730	0.0095629	6401	0.000383222	0.685987	5889	0.000352569	0.910511	32532	0.00194766	0	0	0.0122464	60
NZ73+77	TAGGTGAG	TAGGTGAG	0	0	0	0	0	0	99491	1	99491	0	0	49840	0.50095	49651	0.49905	468	0.00470394	0	0	0	0	0	0	0	0	0	0	0	3097704250	237019319	5750470	5696308	0.990581	54162	0.00941871	2225	0.000386925	0.684944	2066	0.000359275	0.917231	11001	0.00191306	0	0	0.012078	60
NZ73+77	TAGGTTCA	TAGGTTCA	0	0	0	0	0	0	930271	1	930271	0	0	464287	0.499088	465984	0.500912	2997	0.00322164	0	0	0	0	0	0	0	0	0	0	0	3099273655	237019319	54083987	53534105	0.989833	549882	0.0101672	21657	0.000400433	0.691878	19031	0.000351879	0.917398	84535	0.00156303	0	0	0.0124825	60
NZ73+77	TCACACGC	TCACACGC	0	0	0	0	0	0	514394	1	514394	0	0	256521	0.498686	257873	0.501314	1887	0.00366839	0	0	0	0	0	0	0	0	0	0	0	3098826492	237019319	29853278	29567155	0.990416	286123	0.00958431	11635	0.000389739	0.686549	10259	0.000343647	0.920265	49133	0.00164582	0	0	0.0119635	60
NZ73+77	TCACAGAG	TCACAGAG	0	0	0	0	0	0	814627	1	814627	0	0	406455	0.498946	408172	0.501054	2676	0.00328494	0	0	0	0	0	0	0	0	0	0	0	3099475045	237019319	47347205	46885899	0.990257	461306	0.00974305	19011	0.000401523	0.694282	16733	0.000353411	0.916632	74416	0.00157171	0	0	0.0120697	60
NZ73+77	TCACATCA	TCACATCA	0	0	0	0	0	0	930093	1	930093	0	0	464752	0.499683	465341	0.500317	3522	0.00378672	0	0	0	0	0	0	0	0	0	0	0	3099273422	237019319	53916445	53365912	0.989789	550533	0.0102109	21412	0.000397133	0.689894	18598	0.000344941	0.919561	93954	0.00174259	0	0	0.0126955	60
NZ73+77	TCCGAATC	TCCGAATC	0	0	0	0	0	0	1165914	1	1165914	0	0	583387	0.500369	582527	0.499631	4640	0.00397971	0	0	0	0	0	0	0	0	0	0	0	3099378065	237019319	67546489	66887621	0.990246	658868	0.00975429	26684	0.000395046	0.688577	22664	0.000335532	0.913387	119019	0.00176203	0	0	0.0122469	60
NZ73+77	TCCGACGA	TCCGACGA	0	0	0	0	0	0	1288971	1	1288971	0	0	643343	0.499114	645628	0.500886	4575	0.00354934	0	0	0	0	0	0	0	0	0	0	0	3099618323	237019319	74835380	74086717	0.989996	748663	0.0100041	28841	0.000385393	0.690926	27107	0.000362222	0.917106	122213	0.00163309	0	0	0.0123848	60
NZ73+77	TCCGAGAT	TCCGAGAT	0	0	0	0	0	0	1542426	1	1542426	0	0	771385	0.500112	771041	0.499888	1821	0.00118061	0	0	0	0	0	0	0	0	0	0	0	3099199135	237019319	90450899	89555570	0.990101	895329	0.00989851	40631	0.000449205	0.714996	35941	0.000397354	0.926741	90538	0.00100096	0	0	0.011746	60
NZ73+77	TCCGATCG	TCCGATCG	0	0	0	0	0	0	1166942	1	1166942	0	0	583168	0.49974	583774	0.50026	4393	0.00376454	0	0	0	0	0	0	0	0	0	0	0	3099456734	237019419	67700746	67052793	0.990429	647953	0.00957084	26330	0.000388917	0.684542	23399	0.000345624	0.916749	112931	0.00166809	0	0	0.0119735	60
NZ73+77	TGATGATC	TGATGATC	0	0	0	0	0	0	117821	1	117821	0	0	59158	0.502101	58663	0.497899	341	0.00289422	0	0	0	0	0	0	0	0	0	0	0	3098438438	237019319	6848998	6763829	0.987565	85169	0.0124352	2823	0.000412177	0.706341	2562	0.000374069	0.928962	11379	0.00166141	0	0	0.0148829	60
NZ73+77	TGATGCGC	TGATGCGC	0	0	0	0	0	0	553335	1	553335	0	0	276902	0.500424	276433	0.499576	2476	0.00447469	0	0	0	0	0	0	0	0	0	0	0	3099145012	237019319	31995511	31699858	0.99076	295653	0.00924045	12385	0.000387086	0.691805	11284	0.000352674	0.916696	59748	0.00186739	0	0	0.0118476	60
NZ73+77	TGATGGAA	TGATGGAA	0	0	0	0	0	0	284326	1	284326	0	0	142840	0.502381	141486	0.497619	1201	0.00422402	0	0	0	0	0	0	0	0	0	0	0	3098794757	237019319	16429317	16268117	0.990188	161200	0.00981173	6294	0.000383096	0.687798	5831	0.000354914	0.924027	31875	0.00194013	0	0	0.0124899	60
NZ73+77	TGATGTCC	TGATGTCC	0	0	0	0	0	0	466669	1	466669	0	0	233091	0.499478	233578	0.500522	2005	0.00429641	0	0	0	0	0	0	0	0	0	0	0	3099635046	237019319	26995284	26729320	0.990148	265964	0.00985224	10472	0.00038792	0.691272	9395	0.000348024	0.922193	50366	0.00186573	0	0	0.0124539	60
NZ73+77	TGCATATC	TGCATATC	0	0	0	0	0	0	1020691	1	1020691	0	0	509749	0.499416	510942	0.500584	3799	0.00372199	0	0	0	0	0	0	0	0	0	0	0	3099484999	237019319	59224426	58676211	0.990743	548215	0.00925657	23186	0.000391494	0.686017	20552	0.000347019	0.916991	98082	0.00165611	0	0	0.0116512	60
NZ73+77	TGCATCGA	TGCATCGA	0	0	0	0	0	0	3693	1	3693	0	0	1890	0.511779	1803	0.488221	14	0.00379096	0	0	0	0	0	0	0	0	0	0	0	3095879866	237019318	209859	207481	0.988669	2378	0.0113314	92	0.00043839	0.728261	72	0.000343088	0.916667	618	0.00294483	0	0	0.0150577	60
NZ73+77	TGCATGAT	TGCATGAT	0	0	0	0	0	0	658248	1	658248	0	0	328494	0.499043	329754	0.500957	2376	0.00360958	0	0	0	0	0	0	0	0	0	0	0	3099041108	237019319	38204448	37838380	0.990418	366068	0.00958182	15341	0.00040155	0.689199	13804	0.000361319	0.915097	67163	0.00175799	0	0	0.0121027	60
NZ73+77	TGCATTCG	TGCATTCG	0	0	0	0	0	0	410643	1	410643	0	0	205724	0.50098	204919	0.49902	1801	0.0043858	0	0	0	0	0	0	0	0	0	0	0	3099021472	237019319	23741273	23517382	0.99057	223891	0.00943045	8931	0.00037618	0.681559	8271	0.000348381	0.917664	44592	0.00187825	0	0	0.0120333	60
NZ73+77	TGTACATC	TGTACATC	0	0	0	0	0	0	258025	1	258025	0	0	128726	0.49889	129299	0.50111	1196	0.00463521	0	0	0	0	0	0	0	0	0	0	0	3098824276	237019319	14937060	14816591	0.991935	120469	0.00806511	5804	0.000388564	0.675224	5034	0.000337014	0.91319	26795	0.00179386	0	0	0.0105845	60
NZ73+77	TGTACCGA	TGTACCGA	0	0	0	0	0	0	396927	1	396927	0	0	198245	0.49945	198682	0.50055	1543	0.00388736	0	0	0	0	0	0	0	0	0	0	0	3099461180	237019319	22979766	22752303	0.990102	227463	0.0098984	8520	0.000370761	0.681925	7850	0.000341605	0.91758	41689	0.00181416	0	0	0.0124249	60
NZ74+78	ACAGTATC	ACAGTATC	0	0	0	0	0	0	396059	1	396059	0	0	197820	0.499471	198239	0.500529	1468	0.00370652	0	0	0	0	0	0	0	0	0	0	0	3099424958	237019319	22984588	22783452	0.991249	201136	0.00875091	8390	0.000365027	0.692372	7899	0.000343665	0.916065	38081	0.00165681	0	0	0.0111164	60
NZ74+78	ACAGTCGA	ACAGTCGA	0	0	0	0	0	0	570348	1	570348	0	0	284119	0.49815	286229	0.50185	185	0.000324363	0	0	0	0	0	0	0	0	0	0	0	3098290874	237019319	33606762	33305902	0.991048	300860	0.00895237	14510	0.000431758	0.731289	14172	0.000421701	0.929932	26874	0.00079966	0	0	0.0106055	60
NZ74+78	ACGACATC	ACGACATC	0	0	0	0	0	0	260527	1	260527	0	0	130244	0.499925	130283	0.500075	1249	0.00479413	0	0	0	0	0	0	0	0	0	0	0	3099316582	237019319	14982724	14806960	0.988269	175764	0.0117311	4978	0.000332249	0.692045	4679	0.000312293	0.914725	33574	0.00224085	0	0	0.0146165	60
NZ74+78	ACGACCGC	ACGACCGC	0	0	0	0	0	0	630033	1	630033	0	0	314653	0.499423	315380	0.500577	3340	0.00530131	0	0	0	0	0	0	0	0	0	0	0	3099238526	237019319	36309324	35991084	0.991235	318240	0.00876469	14500	0.000399346	0.722828	13884	0.000382381	0.92639	75040	0.00206669	0	0	0.0116131	60
NZ74+78	ACGACGAA	ACGACGAA	0	0	0	0	0	0	553246	1	553246	0	0	276907	0.500513	276339	0.499487	2612	0.00472123	0	0	0	0	0	0	0	0	0	0	0	3099229388	237019319	31872559	31559806	0.990187	312753	0.00981261	11206	0.000351588	0.693111	10882	0.000341422	0.919776	67142	0.00210658	0	0	0.0126122	60
NZ74+78	ACGACTCC	ACGACTCC	0	0	0	0	0	0	611241	1	611241	0	0	304925	0.498862	306316	0.501138	2671	0.0043698	0	0	0	0	0	0	0	0	0	0	0	3099087876	237019319	35291031	34955229	0.990485	335802	0.00951522	12603	0.000357116	0.690153	11587	0.000328327	0.914818	69804	0.00197795	0	0	0.0121786	60
NZ74+78	ACTGAATC	ACTGAATC	0	0	0	0	0	0	1384028	1	1384028	0	0	690583	0.498966	693445	0.501034	3807	0.00275067	0	0	0	0	0	0	0	0	0	0	0	3099350041	237019319	80532410	79788049	0.990757	744361	0.009243	33436	0.000415187	0.702775	28565	0.000354702	0.921057	121046	0.00150307	0	0	0.011516	60
NZ74+78	ACTGACGA	ACTGACGA	0	0	0	0	0	0	608053	1	608053	0	0	303915	0.499817	304138	0.500183	2276	0.00374309	0	0	0	0	0	0	0	0	0	0	0	3099325971	237019319	35281264	34968433	0.991133	312831	0.00886677	13043	0.000369686	0.702292	12424	0.000352142	0.922891	58633	0.00166187	0	0	0.0112505	60
NZ74+78	ACTGAGAT	ACTGAGAT	0	0	0	0	0	0	110630	1	110630	0	0	55286	0.499738	55344	0.500262	172	0.00155473	0	0	0	0	0	0	0	0	0	0	0	3098464145	237019319	6470300	6393506	0.988131	76794	0.0118687	2470	0.000381744	0.695547	2252	0.000348052	0.904529	8288	0.00128093	0	0	0.0138794	60
NZ74+78	ACTGATCG	ACTGATCG	0	0	0	0	0	0	740340	1	740340	0	0	369820	0.499527	370520	0.500473	2329	0.00314585	0	0	0	0	0	0	0	0	0	0	0	3099364369	237019319	43098318	42688619	0.990494	409699	0.00950615	16526	0.000383449	0.693755	14989	0.000347786	0.918807	64298	0.00149189	0	0	0.0117293	60
NZ74+78	AGCCACGC	AGCCACGC	0	0	0	0	0	0	1337672	1	1337672	0	0	667878	0.499284	669794	0.500716	5030	0.00376026	0	0	0	0	0	0	0	0	0	0	0	3099563011	237019319	77554854	76881895	0.991323	672959	0.0086772	26145	0.000337116	0.682463	25517	0.000329019	0.919701	129483	0.00166957	0	0	0.0110129	60
NZ74+78	AGCCAGAG	AGCCAGAG	0	0	0	0	0	0	1565265	1	1565265	0	0	782487	0.499907	782778	0.500093	5844	0.00373355	0	0	0	0	0	0	0	0	0	0	0	3099672630	237019319	90755165	89936649	0.990981	818516	0.00901895	33984	0.000374458	0.707186	33811	0.000372552	0.922777	151543	0.0016698	0	0	0.0114358	60
NZ74+78	AGCCATCA	AGCCATCA	0	0	0	0	0	0	1481421	1	1481421	0	0	741025	0.500212	740396	0.499788	4366	0.00294717	0	0	0	0	0	0	0	0	0	0	0	3099603455	237019319	86250470	85449483	0.990713	800987	0.00928676	30759	0.000356624	0.693195	28795	0.000333853	0.918146	124702	0.00144581	0	0	0.011423	60
NZ74+78	AGCGTATC	AGCGTATC	0	0	0	0	0	0	1605153	1	1605153	0	0	802977	0.50025	802176	0.49975	537	0.000334548	0	0	0	0	0	0	0	0	0	0	0	3099572738	237019319	94562154	93762155	0.99154	799999	0.00846003	44287	0.000468337	0.730643	41116	0.000434804	0.929881	72280	0.000764365	0	0	0.0101275	60
NZ74+78	AGCGTCGA	AGCGTCGA	0	0	0	0	0	0	1161803	1	1161803	0	0	581133	0.500199	580670	0.499801	1086	0.000934754	0	0	0	0	0	0	0	0	0	0	0	3099007535	237019319	68302295	67702689	0.991221	599606	0.00877871	29253	0.000428287	0.726763	28401	0.000415813	0.931728	61764	0.000904274	0	0	0.0105271	60
NZ74+78	AGCGTGAT	AGCGTGAT	0	0	0	0	0	0	1585644	1	1585644	0	0	790944	0.498816	794700	0.501184	5144	0.00324411	0	0	0	0	0	0	0	0	0	0	0	3099521744	237019319	92293549	91514831	0.991563	778718	0.0084374	34803	0.00037709	0.705715	33955	0.000367902	0.924253	131943	0.0014296	0	0	0.010612	60
NZ74+78	AGCGTTCG	AGCGTTCG	0	0	0	0	0	0	885805	1	885805	0	0	442914	0.500013	442891	0.499987	3269	0.00369043	0	0	0	0	0	0	0	0	0	0	0	3099092556	237019319	51446812	51014867	0.991604	431945	0.00839595	19286	0.000374873	0.697397	17820	0.000346377	0.923513	81951	0.00159293	0	0	0.0107101	60
NZ74+78	ATGTGCGC	ATGTGCGC	0	0	0	0	0	0	816751	1	816751	0	0	407763	0.49925	408988	0.50075	3176	0.00388858	0	0	0	0	0	0	0	0	0	0	0	3099259157	237019319	47368465	47022807	0.992703	345658	0.00729722	17283	0.000364863	0.684025	16648	0.000351457	0.918849	77786	0.00164215	0	0	0.00965569	60
NZ74+78	ATGTGGAG	ATGTGGAG	0	0	0	0	0	0	1420597	1	1420597	0	0	709700	0.499579	710897	0.500421	4964	0.00349431	0	0	0	0	0	0	0	0	0	0	0	3099608769	237019319	82528176	81832127	0.991566	696049	0.00843408	30512	0.000369716	0.695956	29689	0.000359744	0.922396	128907	0.00156198	0	0	0.0107255	60
NZ74+78	ATGTGTCA	ATGTGTCA	0	0	0	0	0	0	414116	1	414116	0	0	207114	0.500135	207002	0.499865	1522	0.0036753	0	0	0	0	0	0	0	0	0	0	0	3099005941	237019319	23978724	23756329	0.990725	222395	0.00927468	9211	0.000384132	0.709912	8912	0.000371663	0.923586	43057	0.00179563	0	0	0.0118261	60
NZ74+78	ATTCGATC	ATTCGATC	0	0	0	0	0	0	1544353	1	1544353	0	0	772745	0.500368	771608	0.499632	3864	0.00250202	0	0	0	0	0	0	0	0	0	0	0	3099031389	237019319	90038265	89244780	0.991187	793485	0.00881275	40351	0.000448154	0.721766	37417	0.000415568	0.923457	123467	0.00137127	0	0	0.0110477	60
NZ74+78	ATTCGCGA	ATTCGCGA	0	0	0	0	0	0	1529521	1	1529521	0	0	764365	0.499741	765156	0.500259	5242	0.00342722	0	0	0	0	0	0	0	0	0	0	0	3099530200	237019319	88836694	88014327	0.990743	822367	0.00925706	32838	0.000369645	0.701748	31779	0.000357724	0.921867	140560	0.00158223	0	0	0.0115667	60
NZ74+78	ATTCGGAT	ATTCGGAT	0	0	0	0	0	0	1692804	1	1692804	0	0	846061	0.499799	846743	0.500201	5448	0.00321833	0	0	0	0	0	0	0	0	0	0	0	3099778045	237019319	98345611	97452677	0.99092	892934	0.00907955	36177	0.000367856	0.68867	35299	0.000358928	0.922037	152864	0.00155436	0	0	0.0113607	60
NZ74+78	ATTCGTCG	ATTCGTCG	0	0	0	0	0	0	1074037	1	1074037	0	0	536091	0.499136	537946	0.500864	3939	0.00366747	0	0	0	0	0	0	0	0	0	0	0	3099199262	237019419	62292604	61747763	0.991254	544841	0.00874648	22523	0.000361568	0.683612	20954	0.00033638	0.920397	103424	0.00166029	0	0	0.0111047	60
NZ74+78	CACTGATC	CACTGATC	0	0	0	0	0	0	413467	1	413467	0	0	206905	0.500415	206562	0.499585	1671	0.00404143	0	0	0	0	0	0	0	0	0	0	0	3099408903	237019319	23969706	23774722	0.991865	194984	0.0081346	8623	0.000359746	0.698597	8176	0.000341097	0.922945	40265	0.00167983	0	0	0.0105153	60
NZ74+78	CACTGCGA	CACTGCGA	0	0	0	0	0	0	521581	1	521581	0	0	261229	0.500841	260352	0.499159	1577	0.0030235	0	0	0	0	0	0	0	0	0	0	0	3099106159	237019319	30328198	30054581	0.990978	273617	0.00902187	12955	0.00042716	0.700425	11854	0.000390857	0.925595	46959	0.00154836	0	0	0.0113882	60
NZ74+78	CAGTCATC	CAGTCATC	0	0	0	0	0	0	1034411	1	1034411	0	0	517458	0.500244	516953	0.499756	4574	0.00442184	0	0	0	0	0	0	0	0	0	0	0	3099244666	237019419	59933525	59452898	0.991981	480627	0.00801933	19772	0.000329899	0.669937	19255	0.000321273	0.917632	101755	0.0016978	0	0	0.0103683	60
NZ74+78	CAGTCCGA	CAGTCCGA	0	0	0	0	0	0	163781	1	163781	0	0	81752	0.499154	82029	0.500846	296	0.00180729	0	0	0	0	0	0	0	0	0	0	0	3098247980	237019319	9558629	9436143	0.987186	122486	0.0128142	3375	0.000353084	0.706963	3198	0.000334567	0.924328	13325	0.00139403	0	0	0.0148959	60
NZ74+78	CAGTCGAT	CAGTCGAT	0	0	0	0	0	0	574131	1	574131	0	0	287201	0.500236	286930	0.499764	2162	0.00376569	0	0	0	0	0	0	0	0	0	0	0	3099053910	237019319	33300656	33003802	0.991086	296854	0.00891436	11916	0.000357831	0.690416	11790	0.000354047	0.917472	55609	0.00166991	0	0	0.0112961	60
NZ74+78	CAGTCTCG	CAGTCTCG	0	0	0	0	0	0	511516	1	511516	0	0	256289	0.501038	255227	0.498962	275	0.000537618	0	0	0	0	0	0	0	0	0	0	0	3099062709	237019319	30100733	29822458	0.990755	278275	0.00924479	13246	0.000440056	0.732976	11499	0.000382017	0.921124	27308	0.00090722	0	0	0.0109741	60
NZ74+78	CATCAATC	CATCAATC	0	0	0	0	0	0	482832	1	482832	0	0	241692	0.500572	241140	0.499428	1971	0.00408217	0	0	0	0	0	0	0	0	0	0	0	3098802152	237019319	27989139	27739298	0.991074	249841	0.00892636	10264	0.000366714	0.705281	9728	0.000347563	0.921772	47731	0.00170534	0	0	0.011346	60
NZ74+78	CATCACGC	CATCACGC	0	0	0	0	0	0	986264	1	986264	0	0	492761	0.499624	493503	0.500376	3241	0.00328614	0	0	0	0	0	0	0	0	0	0	0	3099340788	237019319	57178946	56651291	0.990772	527655	0.00922813	22861	0.000399815	0.711999	21490	0.000375838	0.925966	98163	0.00171677	0	0	0.0117206	60
NZ74+78	CATCAGAA	CATCAGAA	0	0	0	0	0	0	664546	1	664546	0	0	332189	0.499874	332357	0.500126	2800	0.0042134	0	0	0	0	0	0	0	0	0	0	0	3099553205	237019319	38375311	38034274	0.991113	341037	0.00888689	13268	0.000345743	0.693096	13206	0.000344128	0.922762	74932	0.00195261	0	0	0.0115294	60
NZ74+78	CATCATCC	CATCATCC	0	0	0	0	0	0	526636	1	526636	0	0	263296	0.499958	263340	0.500042	1111	0.00210962	0	0	0	0	0	0	0	0	0	0	0	3098617103	237019319	30761351	30483381	0.990964	277970	0.00903634	13388	0.000435221	0.71945	11489	0.000373488	0.92854	40573	0.00131896	0	0	0.011164	60
NZ74+78	CGGATATC	CGGATATC	0	0	0	0	0	0	253836	1	253836	0	0	127116	0.50078	126720	0.49922	505	0.00198947	0	0	0	0	0	0	0	0	0	0	0	3098602108	237019319	14841507	14714224	0.991424	127283	0.00857615	6426	0.000432975	0.713663	6003	0.000404474	0.92054	18714	0.00126092	0	0	0.0106745	60
NZ74+78	CGGATCGA	CGGATCGA	0	0	0	0	0	0	1679667	1	1679667	0	0	840251	0.500249	839416	0.499751	4653	0.00277019	0	0	0	0	0	0	0	0	0	0	0	3099338655	237019319	97867638	96898527	0.990098	969111	0.00990226	37957	0.00038784	0.699318	35492	0.000362653	0.923645	139356	0.00142392	0	0	0.0120767	60
NZ74+78	CGGATGAT	CGGATGAT	0	0	0	0	0	0	122909	1	122909	0	0	61170	0.497685	61739	0.502315	80	0.000650888	0	0	0	0	0	0	0	0	0	0	0	3097953081	237019319	7224325	7161813	0.991347	62512	0.00865299	3174	0.000439349	0.715816	2948	0.000408066	0.926052	6971	0.000964934	0	0	0.0104653	60
NZ74+78	CGGATTCG	CGGATTCG	0	0	0	0	0	0	109711	1	109711	0	0	54755	0.499084	54956	0.500916	69	0.000628925	0	0	0	0	0	0	0	0	0	0	0	3096175649	237019319	6426295	6346246	0.987544	80049	0.0124565	2631	0.000409412	0.697073	2626	0.000408634	0.931455	7845	0.00122077	0	0	0.0144953	60
NZ74+78	CGTGTCGC	CGTGTCGC	0	0	0	0	0	0	905986	1	905986	0	0	452555	0.499517	453431	0.500483	4401	0.00485769	0	0	0	0	0	0	0	0	0	0	0	3099278856	237019319	52317043	51871128	0.991477	445915	0.00852332	16841	0.000321903	0.661718	16366	0.000312823	0.916595	99920	0.00190989	0	0	0.0110679	60
NZ74+78	CGTGTGAG	CGTGTGAG	0	0	0	0	0	0	1168185	1	1168185	0	0	583602	0.49958	584583	0.50042	4591	0.00393003	0	0	0	0	0	0	0	0	0	0	0	3099620656	237019319	67694273	67113333	0.991418	580940	0.00858182	24384	0.000360208	0.694144	24088	0.000355835	0.922119	115888	0.00171193	0	0	0.0110098	60
NZ74+78	CGTGTTCA	CGTGTTCA	0	0	0	0	0	0	254690	1	254690	0	0	127837	0.501932	126853	0.498068	910	0.00357297	0	0	0	0	0	0	0	0	0	0	0	3098886638	237019319	14710786	14524322	0.987325	186464	0.0126753	4701	0.000319561	0.699638	4440	0.000301819	0.903604	29696	0.00201865	0	0	0.0153154	60
NZ74+78	CTAACCGC	CTAACCGC	0	0	0	0	0	0	1786177	1	1786177	0	0	894058	0.500543	892119	0.499457	2575	0.00144163	0	0	0	0	0	0	0	0	0	0	0	3099001169	237019319	104547396	103602677	0.990964	944719	0.00903627	45508	0.000435286	0.72073	41060	0.000392741	0.924014	124643	0.00119222	0	0	0.0110565	60
NZ74+78	CTAACGAG	CTAACGAG	0	0	0	0	0	0	1837464	1	1837464	0	0	917160	0.499144	920304	0.500856	6893	0.00375137	0	0	0	0	0	0	0	0	0	0	0	3099607385	237019319	106494016	105547752	0.991114	946264	0.00888561	39916	0.000374819	0.694934	37712	0.000354123	0.921219	180669	0.00169652	0	0	0.0113111	60
NZ74+78	CTAACTCA	CTAACTCA	0	0	0	0	0	0	1522156	1	1522156	0	0	761469	0.500257	760687	0.499743	4896	0.00321649	0	0	0	0	0	0	0	0	0	0	0	3099553205	237019319	88433798	87575705	0.990297	858093	0.00970322	32443	0.000366862	0.692938	29531	0.000333933	0.916427	139177	0.0015738	0	0	0.0119778	60
NZ74+78	CTATGATC	CTATGATC	0	0	0	0	0	0	1350287	1	1350287	0	0	674290	0.499368	675997	0.500632	4223	0.00312748	0	0	0	0	0	0	0	0	0	0	0	3099448219	237019319	78520639	77853023	0.991498	667616	0.00850243	29609	0.000377086	0.700091	27654	0.000352188	0.919541	115995	0.00147725	0	0	0.010709	60
NZ74+78	CTATGCGA	CTATGCGA	0	0	0	0	0	0	1563624	1	1563624	0	0	780688	0.499281	782936	0.500719	5196	0.00332305	0	0	0	0	0	0	0	0	0	0	0	3099572519	237019319	90849348	90033973	0.991025	815375	0.00897502	33315	0.000366706	0.700675	32480	0.000357515	0.924784	139317	0.00153349	0	0	0.0112327	60
NZ74+78	CTATGGAT	CTATGGAT	0	0	0	0	0	0	1458100	1	1458100	0	0	728110	0.499355	729990	0.500645	4702	0.00322474	0	0	0	0	0	0	0	0	0	0	0	3099398487	237019319	84788681	84019482	0.990928	769199	0.00907195	31647	0.000373246	0.7031	30582	0.000360685	0.921555	128560	0.00151624	0	0	0.0113221	60
NZ74+78	CTATGTCG	CTATGTCG	0	0	0	0	0	0	1811546	1	1811546	0	0	905642	0.499928	905904	0.500072	6902	0.00381001	0	0	0	0	0	0	0	0	0	0	0	3100209087	237019419	105128201	104180818	0.990988	947383	0.00901169	39158	0.000372479	0.699729	37193	0.000353787	0.919797	172958	0.00164521	0	0	0.0113832	60
NZ74+78	GAATCATC	GAATCATC	0	0	0	0	0	0	1264830	1	1264830	0	0	631937	0.499622	632893	0.500378	5032	0.0039784	0	0	0	0	0	0	0	0	0	0	0	3099397843	237019319	73241451	72573684	0.990883	667767	0.00911734	26667	0.000364097	0.697004	25606	0.000349611	0.926541	127126	0.00173571	0	0	0.0115668	60
NZ74+78	GAATCCGA	GAATCCGA	0	0	0	0	0	0	1556010	1	1556010	0	0	777596	0.499737	778414	0.500263	4354	0.00279818	0	0	0	0	0	0	0	0	0	0	0	3099926306	237019319	90698980	89844284	0.990577	854696	0.00942344	33296	0.000367104	0.702186	31905	0.000351768	0.917693	124996	0.00137814	0	0	0.0115204	60
NZ74+78	GAATCGAT	GAATCGAT	0	0	0	0	0	0	1073798	1	1073798	0	0	538516	0.501506	535282	0.498494	1077	0.00100298	0	0	0	0	0	0	0	0	0	0	0	3098848737	237019319	62978904	62403141	0.990858	575763	0.00914216	27187	0.000431684	0.722735	25892	0.000411122	0.922254	65537	0.00104062	0	0	0.0110256	60
NZ74+78	GAATCTCG	GAATCTCG	0	0	0	0	0	0	1529044	1	1529044	0	0	763024	0.49902	766020	0.50098	5511	0.00360421	0	0	0	0	0	0	0	0	0	0	0	3099737757	237019319	88644389	87821126	0.990713	823263	0.00928725	31779	0.0003585	0.684383	29442	0.000332136	0.917872	148650	0.00167693	0	0	0.0116548	60
NZ74+78	GACACCGC	GACACCGC	0	0	0	0	0	0	1735754	1	1735754	0	0	870862	0.50172	864892	0.49828	2455	0.00141437	0	0	0	0	0	0	0	0	0	0	0	3099086896	237019319	101705579	100808840	0.991183	896739	0.00881701	43899	0.000431628	0.726509	40551	0.00039871	0.931346	113441	0.00111539	0	0	0.0107627	60
NZ74+78	GACACGAG	GACACGAG	0	0	0	0	0	0	1168480	1	1168480	0	0	585775	0.501314	582705	0.498686	2421	0.00207192	0	0	0	0	0	0	0	0	0	0	0	3099292124	237019319	68195816	67537276	0.990343	658540	0.0096566	27134	0.000397884	0.719761	26212	0.000384364	0.920151	89175	0.00130763	0	0	0.0117465	60
NZ74+78	GACACTCA	GACACTCA	0	0	0	0	0	0	8073	1	8073	0	0	4437	0.54961	3636	0.45039	14	0.00173418	0	0	0	0	0	0	0	0	0	0	0	3036495003	200630282	468845	464288	0.99028	4557	0.00971963	169	0.00036046	0.745562	139	0.000296473	0.935252	935	0.00199426	0	0	0.0123708	60
NZ74+78	GCTCAATC	GCTCAATC	0	0	0	0	0	0	53039	1	53039	0	0	26654	0.502536	26385	0.497464	164	0.00309206	0	0	0	0	0	0	0	0	0	0	0	3097534195	237019319	3076892	3050406	0.991392	26486	0.00860804	1417	0.00046053	0.701482	1173	0.000381229	0.909633	5220	0.00169652	0	0	0.0111463	60
NZ74+78	GCTCACGA	GCTCACGA	0	0	0	0	0	0	1506285	1	1506285	0	0	750875	0.498495	755410	0.501505	5729	0.0038034	0	0	0	0	0	0	0	0	0	0	0	3099918409	237019319	87376769	86604845	0.991166	771924	0.00883443	32407	0.000370888	0.706637	31046	0.000355312	0.920119	144122	0.00164943	0	0	0.0112101	60
NZ74+78	GCTCAGAT	GCTCAGAT	0	0	0	0	0	0	72238	1	72238	0	0	35982	0.498103	36256	0.501897	311	0.00430521	0	0	0	0	0	0	0	0	0	0	0	3097861965	237019319	4175800	4139694	0.991354	36106	0.00864649	1503	0.000359931	0.687957	1475	0.000353226	0.917966	7939	0.00190119	0	0	0.0112608	60
NZ74+78	GCTCATCG	GCTCATCG	0	0	0	0	0	0	1350377	1	1350377	0	0	674505	0.499494	675872	0.500506	4623	0.00342349	0	0	0	0	0	0	0	0	0	0	0	3099417396	237019319	78488876	77774207	0.990895	714669	0.00910535	30092	0.000383392	0.708128	27886	0.000355286	0.919709	122098	0.00155561	0	0	0.0113996	60
NZ74+78	GCTTGCGC	GCTTGCGC	0	0	0	0	0	0	789966	1	789966	0	0	394650	0.499578	395316	0.500422	3495	0.00442424	0	0	0	0	0	0	0	0	0	0	0	3099244983	237019319	45657680	45266166	0.991425	391514	0.00857499	16625	0.000364123	0.696782	16017	0.000350806	0.920959	84394	0.00184841	0	0	0.0111383	60
NZ74+78	GCTTGGAG	GCTTGGAG	0	0	0	0	0	0	1153976	1	1153976	0	0	576345	0.499443	577631	0.500557	5210	0.00451483	0	0	0	0	0	0	0	0	0	0	0	3099557654	237019319	66720799	66134606	0.991214	586193	0.00878576	24409	0.000365838	0.690524	23503	0.000352259	0.921499	124268	0.00186251	0	0	0.0113664	60
NZ74+78	GCTTGTCA	GCTTGTCA	0	0	0	0	0	0	794629	1	794629	0	0	397439	0.500157	397190	0.499843	3089	0.00388735	0	0	0	0	0	0	0	0	0	0	0	3099012463	237019319	46033504	45621070	0.991041	412434	0.00895943	17064	0.000370687	0.706282	16454	0.000357435	0.920688	79251	0.00172159	0	0	0.0114091	60
NZ74+78	GTACGATC	GTACGATC	0	0	0	0	0	0	147556	1	147556	0	0	74183	0.502745	73373	0.497255	632	0.00428312	0	0	0	0	0	0	0	0	0	0	0	3098464288	237019319	8540494	8469851	0.991728	70643	0.00827154	3256	0.000381243	0.696867	3169	0.000371056	0.924582	15436	0.00180739	0	0	0.0108312	60
NZ74+78	GTACGCGA	GTACGCGA	0	0	0	0	0	0	518229	1	518229	0	0	259040	0.499856	259189	0.500144	2071	0.0039963	0	0	0	0	0	0	0	0	0	0	0	3099096221	237019319	30048847	29789868	0.991381	258979	0.0086186	11649	0.000387669	0.69594	11019	0.000366703	0.924676	50958	0.00169584	0	0	0.0110688	60
NZ74+78	GTACGGAT	GTACGGAT	0	0	0	0	0	0	388379	1	388379	0	0	194616	0.501098	193763	0.498902	1586	0.00408364	0	0	0	0	0	0	0	0	0	0	0	3098973540	237019319	22495206	22291089	0.990926	204117	0.0090738	7936	0.000352786	0.691658	7909	0.000351586	0.926287	40023	0.00177918	0	0	0.0115574	60
NZ74+78	GTACGTCG	GTACGTCG	0	0	0	0	0	0	522988	1	522988	0	0	260899	0.498862	262089	0.501138	1991	0.00380697	0	0	0	0	0	0	0	0	0	0	0	3099201193	237019319	30329372	30066502	0.991333	262870	0.00866718	11314	0.000373038	0.699399	10769	0.000355068	0.922834	51229	0.00168909	0	0	0.0110844	60
NZ74+78	GTCGTATC	GTCGTATC	0	0	0	0	0	0	346877	1	346877	0	0	173440	0.500004	173437	0.499996	1699	0.00489799	0	0	0	0	0	0	0	0	0	0	0	3099495876	237019319	19970620	19802534	0.991583	168086	0.00841666	7100	0.000355522	0.689718	7000	0.000350515	0.924	42570	0.00213163	0	0	0.0112543	60
NZ74+78	GTCGTCGC	GTCGTCGC	0	0	0	0	0	0	588244	1	588244	0	0	293473	0.498897	294771	0.501103	2666	0.00453213	0	0	0	0	0	0	0	0	0	0	0	3099109183	237019319	33965743	33656374	0.990892	309369	0.00910827	12791	0.000376585	0.704871	11955	0.000351972	0.920284	67390	0.00198406	0	0	0.0118209	60
NZ74+78	GTCGTGAA	GTCGTGAA	0	0	0	0	0	0	95782	1	95782	0	0	48177	0.502986	47605	0.497014	60	0.000626423	0	0	0	0	0	0	0	0	0	0	0	3038367426	200630282	5628438	5553894	0.986756	74544	0.0132442	2269	0.000403131	0.717497	2247	0.000399223	0.930129	5637	0.00100152	0	0	0.015048	60
NZ74+78	GTCGTTCC	GTCGTTCC	0	0	0	0	0	0	441730	1	441730	0	0	221542	0.501533	220188	0.498467	1928	0.00436466	0	0	0	0	0	0	0	0	0	0	0	3099122914	237019319	25549521	25315047	0.990823	234474	0.00917724	8813	0.000344938	0.685124	8622	0.000337462	0.919276	47585	0.00186246	0	0	0.0117221	60
NZ74+78	GTGCAATC	GTGCAATC	0	0	0	0	0	0	248226	1	248226	0	0	122999	0.495512	125227	0.504488	155	0.000624431	0	0	0	0	0	0	0	0	0	0	0	3097958374	237019319	14575211	14430348	0.990061	144863	0.009939	6127	0.000420371	0.734128	6187	0.000424488	0.926459	14505	0.000995183	0	0	0.011779	60
NZ74+78	GTGCACGA	GTGCACGA	0	0	0	0	0	0	537382	1	537382	0	0	269936	0.502317	267446	0.497683	1644	0.00305928	0	0	0	0	0	0	0	0	0	0	0	3098836508	237019319	31252564	30961469	0.990686	291095	0.00931428	12090	0.000386848	0.693466	11373	0.000363906	0.917612	48271	0.00154455	0	0	0.0116096	60
NZ74+78	TAGACATC	TAGACATC	0	0	0	0	0	0	1282418	1	1282418	0	0	638503	0.49789	643915	0.50211	973	0.000758723	0	0	0	0	0	0	0	0	0	0	0	3099029324	237019319	75369380	74709147	0.99124	660233	0.00875996	32555	0.000431939	0.725296	30679	0.000407049	0.922227	68444	0.000908114	0	0	0.0105071	60
NZ74+78	TAGACCGA	TAGACCGA	0	0	0	0	0	0	1680382	1	1680382	0	0	840374	0.500109	840008	0.499891	701	0.000417167	0	0	0	0	0	0	0	0	0	0	0	3098978572	237019319	98986199	98099173	0.991039	887026	0.00896111	50115	0.000506283	0.738701	43296	0.000437394	0.92027	77448	0.000782412	0	0	0.0106872	60
NZ74+78	TAGACGAT	TAGACGAT	0	0	0	0	0	0	1704087	1	1704087	0	0	853199	0.500678	850888	0.499322	4637	0.00272111	0	0	0	0	0	0	0	0	0	0	0	3099640473	237019319	99349715	98460187	0.991046	889528	0.0089535	36791	0.000370318	0.697154	35384	0.000356156	0.921942	133647	0.00134522	0	0	0.0110252	60
NZ74+78	TAGACTCG	TAGACTCG	0	0	0	0	0	0	615228	1	615228	0	0	307668	0.500088	307560	0.499912	2328	0.00378396	0	0	0	0	0	0	0	0	0	0	0	3099274132	237019319	35667529	35339638	0.990807	327891	0.00919298	13676	0.00038343	0.694355	12674	0.000355337	0.922992	61266	0.0017177	0	0	0.0116494	60
NZ74+78	TAGGTCGC	TAGGTCGC	0	0	0	0	0	0	327855	1	327855	0	0	164707	0.502378	163148	0.497622	586	0.00178738	0	0	0	0	0	0	0	0	0	0	0	3098609729	237019319	19162199	18988809	0.990951	173390	0.00904854	7941	0.00041441	0.736557	7578	0.000395466	0.929137	24467	0.00127684	0	0	0.0111353	60
NZ74+78	TAGGTGAG	TAGGTGAG	0	0	0	0	0	0	149666	1	149666	0	0	74838	0.500033	74828	0.499967	664	0.00443655	0	0	0	0	0	0	0	0	0	0	0	3098312758	237019319	8640258	8564196	0.991197	76062	0.00880321	3226	0.000373368	0.689089	3096	0.000358323	0.920543	17147	0.00198455	0	0	0.0115194	60
NZ74+78	TAGGTTCA	TAGGTTCA	0	0	0	0	0	0	4365	1	4365	0	0	2358	0.540206	2007	0.459794	2	0.00045819	0	0	0	0	0	0	0	0	0	0	0	3036495003	200630282	252215	249394	0.988815	2821	0.0111849	83	0.000329084	0.722892	104	0.000412347	0.701923	522	0.00206966	0	0	0.013996	60
NZ74+78	TCACACGC	TCACACGC	0	0	0	0	0	0	728773	1	728773	0	0	364423	0.50005	364350	0.49995	2910	0.00399301	0	0	0	0	0	0	0	0	0	0	0	3099055837	237019319	42189751	41801959	0.990808	387792	0.00919162	14974	0.00035492	0.683117	14246	0.000337665	0.915274	75230	0.00178313	0	0	0.0116673	60
NZ74+78	TCACAGAG	TCACAGAG	0	0	0	0	0	0	477052	1	477052	0	0	238443	0.499826	238609	0.500174	1474	0.00308981	0	0	0	0	0	0	0	0	0	0	0	3098474927	237019319	27673678	27340102	0.987946	333576	0.0120539	10233	0.000369774	0.711912	9538	0.00034466	0.918117	47834	0.0017285	0	0	0.0144968	60
NZ74+78	TCACATCA	TCACATCA	0	0	0	0	0	0	1532506	1	1532506	0	0	766549	0.500193	765957	0.499807	5489	0.00358172	0	0	0	0	0	0	0	0	0	0	0	3099245136	237019319	88852212	87989339	0.990289	862873	0.00971133	34972	0.000393597	0.70525	31406	0.000353463	0.923008	153044	0.00172246	0	0	0.0121808	60
NZ74+78	TCCGAATC	TCCGAATC	0	0	0	0	0	0	2129558	1	2129558	0	0	1067706	0.501374	1061852	0.498626	3165	0.00148622	0	0	0	0	0	0	0	0	0	0	0	3099451232	237019419	124616464	123484014	0.990913	1132450	0.00908748	55198	0.000442943	0.718341	49085	0.000393889	0.925924	148689	0.00119317	0	0	0.0111175	60
NZ74+78	TCCGACGA	TCCGACGA	0	0	0	0	0	0	691953	1	691953	0	0	346384	0.500589	345569	0.499411	2063	0.00298142	0	0	0	0	0	0	0	0	0	0	0	3099492552	237019319	40183414	39677081	0.987399	506333	0.0126005	14618	0.000363782	0.701396	13357	0.000332401	0.919518	67194	0.00167218	0	0	0.0149689	60
NZ74+78	TCCGAGAT	TCCGAGAT	0	0	0	0	0	0	2435620	1	2435620	0	0	1218140	0.500135	1217480	0.499865	7056	0.002897	0	0	0	0	0	0	0	0	0	0	0	3099691371	237019319	141630316	140397265	0.991294	1233051	0.00870612	52817	0.000372922	0.707462	52114	0.000367958	0.92407	200718	0.0014172	0	0	0.0108642	60
NZ74+78	TCCGATCG	TCCGATCG	0	0	0	0	0	0	1601205	1	1601205	0	0	800576	0.499983	800629	0.500017	5564	0.00347488	0	0	0	0	0	0	0	0	0	0	0	3099364366	237019319	92945320	92140569	0.991342	804751	0.00865833	33928	0.000365032	0.69898	33149	0.000356651	0.923346	148675	0.0015996	0	0	0.0109796	60
NZ74+78	TGATGATC	TGATGATC	0	0	0	0	0	0	506242	1	506242	0	0	253651	0.501047	252591	0.498953	2175	0.00429636	0	0	0	0	0	0	0	0	0	0	0	3099094558	237019319	29269470	29016735	0.991365	252735	0.00863477	10689	0.000365193	0.688184	10141	0.00034647	0.917858	55035	0.00188029	0	0	0.0112267	60
NZ74+78	TGATGCGC	TGATGCGC	0	0	0	0	0	0	759985	1	759985	0	0	379570	0.499444	380415	0.500556	3345	0.0044014	0	0	0	0	0	0	0	0	0	0	0	3099567449	237019319	43926969	43525280	0.990856	401689	0.00914447	15794	0.000359551	0.698366	14965	0.000340679	0.920347	83683	0.00190505	0	0	0.0117498	60
NZ74+78	TGATGGAA	TGATGGAA	0	0	0	0	0	0	403476	1	403476	0	0	201950	0.500525	201526	0.499475	2043	0.0050635	0	0	0	0	0	0	0	0	0	0	0	3098416533	237019319	23253837	23052936	0.991361	200901	0.00863948	7827	0.00033659	0.679698	8069	0.000346996	0.927005	47963	0.00206258	0	0	0.0113856	60
NZ74+78	TGATGTCC	TGATGTCC	0	0	0	0	0	0	497269	1	497269	0	0	248870	0.500474	248399	0.499526	2062	0.00414665	0	0	0	0	0	0	0	0	0	0	0	3098954536	237019319	28820212	28572439	0.991403	247773	0.0085972	10688	0.000370851	0.705183	10025	0.000347846	0.920698	49291	0.00171029	0	0	0.0110262	60
NZ74+78	TGCATATC	TGCATATC	0	0	0	0	0	0	1681799	1	1681799	0	0	840699	0.499881	841100	0.500119	4672	0.00277798	0	0	0	0	0	0	0	0	0	0	0	3099514710	237019319	98025485	97138885	0.990955	886600	0.00904459	37560	0.000383166	0.700027	34733	0.000354326	0.922408	134774	0.00137489	0	0	0.011157	60
NZ74+78	TGCATCGA	TGCATCGA	0	0	0	0	0	0	576116	1	576116	0	0	288756	0.501212	287360	0.498788	2198	0.0038152	0	0	0	0	0	0	0	0	0	0	0	3099304186	237019319	33407440	33102764	0.99088	304676	0.00912	12485	0.000373719	0.704525	11690	0.000349922	0.93071	56929	0.00170408	0	0	0.0115477	60
NZ74+78	TGCATGAT	TGCATGAT	0	0	0	0	0	0	869414	1	869414	0	0	434028	0.499219	435386	0.500781	2559	0.00294336	0	0	0	0	0	0	0	0	0	0	0	3099633832	237019319	50564357	50140207	0.991612	424150	0.00838832	18925	0.000374276	0.695007	17842	0.000352857	0.9203	81023	0.00160237	0	0	0.0107178	60
NZ74+78	TGCATTCG	TGCATTCG	0	0	0	0	0	0	569886	1	569886	0	0	284851	0.499839	285035	0.500161	2082	0.00365336	0	0	0	0	0	0	0	0	0	0	0	3099132445	237019419	33063025	32794606	0.991882	268419	0.0081184	12185	0.000368539	0.69446	11546	0.000349212	0.9185	55147	0.00166794	0	0	0.0105041	60
NZ74+78	TGTACATC	TGTACATC	0	0	0	0	0	0	632986	1	632986	0	0	316211	0.499554	316775	0.500446	2341	0.00369834	0	0	0	0	0	0	0	0	0	0	0	3098968104	237019319	36762367	36445457	0.991379	316910	0.0086205	13721	0.000373235	0.698346	12899	0.000350875	0.919606	59291	0.00161282	0	0	0.0109574	60
NZ74+78	TGTACCGA	TGTACCGA	0	0	0	0	0	0	710904	1	710904	0	0	354280	0.498351	356624	0.501649	2470	0.00347445	0	0	0	0	0	0	0	0	0	0	0	3099189553	237019319	41263406	40872310	0.990522	391096	0.00947803	15327	0.000371443	0.694004	14470	0.000350674	0.922253	67489	0.00163557	0	0	0.0118357	60
NZ75+79	ACAGTATC	ACAGTATC	0	0	0	0	0	0	195303	1	195303	0	0	97360	0.498507	97943	0.501493	33	0.000168968	0	0	0	0	0	0	0	0	0	0	0	3098854729	237019319	11489067	11377102	0.990255	111965	0.00974535	3870	0.000336842	0.68863	3681	0.000320392	0.917414	9591	0.000834794	0	0	0.0112374	60
NZ75+79	ACAGTCGA	ACAGTCGA	0	0	0	0	0	0	480326	1	480326	0	0	240802	0.50133	239524	0.49867	1146	0.00238588	0	0	0	0	0	0	0	0	0	0	0	3099008610	237019319	28029303	27747302	0.989939	282001	0.0100609	11534	0.000411498	0.719351	10047	0.000358446	0.928237	36971	0.00131901	0	0	0.0121499	60
NZ75+79	ACGACATC	ACGACATC	0	0	0	0	0	0	507465	1	507465	0	0	254442	0.501398	253023	0.498602	854	0.00168287	0	0	0	0	0	0	0	0	0	0	0	3098863261	237019319	29641073	29405178	0.992042	235895	0.00795838	13154	0.000443776	0.726547	12407	0.000418575	0.925768	37024	0.00124908	0	0	0.0100698	60
NZ75+79	ACGACCGC	ACGACCGC	0	0	0	0	0	0	370015	1	370015	0	0	183445	0.495777	186570	0.504223	109	0.000294583	0	0	0	0	0	0	0	0	0	0	0	3098963603	237019319	21755560	21581152	0.991983	174408	0.00801671	9339	0.00042927	0.739587	9035	0.000415296	0.936027	19189	0.000882027	0	0	0.0097433	60
NZ75+79	ACGACGAA	ACGACGAA	0	0	0	0	0	0	379378	1	379378	0	0	188983	0.498139	190395	0.501861	1166	0.00307345	0	0	0	0	0	0	0	0	0	0	0	3099001169	237019319	22018364	21803832	0.990257	214532	0.00974332	7095	0.000322231	0.686681	7396	0.000335901	0.927934	37161	0.00168773	0	0	0.0120892	60
NZ75+79	ACGACTCC	ACGACTCC	0	0	0	0	0	0	337276	1	337276	0	0	168004	0.49812	169272	0.50188	100	0.000296493	0	0	0	0	0	0	0	0	0	0	0	3098201310	237019319	19828246	19661901	0.991611	166345	0.00838929	8720	0.000439777	0.726606	7629	0.000384754	0.935378	18087	0.000912184	0	0	0.010126	60
NZ75+79	ACTGAATC	ACTGAATC	0	0	0	0	0	0	664438	1	664438	0	0	331999	0.499669	332439	0.500331	454	0.000683284	0	0	0	0	0	0	0	0	0	0	0	3098089010	237019319	38939827	38629621	0.992034	310206	0.00796629	18362	0.000471548	0.734452	15883	0.000407886	0.922433	41233	0.00105889	0	0	0.00990462	60
NZ75+79	ACTGACGA	ACTGACGA	0	0	0	0	0	0	379021	1	379021	0	0	188389	0.497041	190632	0.502959	155	0.000408948	0	0	0	0	0	0	0	0	0	0	0	3098664336	237019319	22277272	22097341	0.991923	179931	0.00807689	10228	0.000459123	0.741689	9704	0.000435601	0.936933	19906	0.000893556	0	0	0.00986517	60
NZ75+79	ACTGAGAT	ACTGAGAT	0	0	0	0	0	0	179094	1	179094	0	0	89702	0.500865	89392	0.499135	869	0.0048522	0	0	0	0	0	0	0	0	0	0	0	3098830227	237019319	10314905	10231937	0.991956	82968	0.00804351	3504	0.000339703	0.685788	3722	0.000360837	0.93122	21001	0.00203599	0	0	0.01078	60
NZ75+79	ACTGATCG	ACTGATCG	0	0	0	0	0	0	491716	1	491716	0	0	246851	0.502019	244865	0.497981	103	0.000209471	0	0	0	0	0	0	0	0	0	0	0	3098445488	237019319	28915094	28612546	0.989537	302548	0.0104633	11028	0.000381393	0.720711	10733	0.00037119	0.911022	28250	0.000976998	0	0	0.0121929	60
NZ75+79	AGCCACGC	AGCCACGC	0	0	0	0	0	0	190051	1	190051	0	0	94968	0.499697	95083	0.500303	136	0.000715597	0	0	0	0	0	0	0	0	0	0	0	3098717621	237019319	11111926	11013599	0.991151	98327	0.00884878	3639	0.000327486	0.691124	3626	0.000326316	0.919195	12635	0.00113707	0	0	0.0106396	60
NZ75+79	AGCCAGAG	AGCCAGAG	0	0	0	0	0	0	1675514	1	1675514	0	0	839395	0.500978	836119	0.499022	850	0.000507307	0	0	0	0	0	0	0	0	0	0	0	3099122914	237019319	98492696	97582510	0.990759	910186	0.00924115	39370	0.000399725	0.728524	37597	0.000381724	0.925792	85619	0.000869293	0	0	0.0108919	60
NZ75+79	AGCCATCA	AGCCATCA	0	0	0	0	0	0	1184664	1	1184664	0	0	595069	0.50231	589595	0.49769	488	0.000411931	0	0	0	0	0	0	0	0	0	0	0	3098945012	237019319	69651174	68973017	0.990264	678157	0.00973648	27743	0.000398313	0.731608	25777	0.000370087	0.920472	62471	0.000896912	0	0	0.0114018	60
NZ75+79	AGCGTATC	AGCGTATC	0	0	0	0	0	0	1062742	1	1062742	0	0	534111	0.502578	528631	0.497422	309	0.000290757	0	0	0	0	0	0	0	0	0	0	0	3099202680	237019319	62485905	61952571	0.991465	533334	0.00853527	26582	0.000425408	0.730532	25472	0.000407644	0.93275	53048	0.000848959	0	0	0.0102173	60
NZ75+79	AGCGTCGA	AGCGTCGA	0	0	0	0	0	0	883611	1	883611	0	0	441454	0.499602	442157	0.500398	789	0.000892927	0	0	0	0	0	0	0	0	0	0	0	3099244789	237019319	51879316	51354330	0.989881	524986	0.0101194	21737	0.000418992	0.744721	20454	0.000394261	0.932629	48489	0.00093465	0	0	0.0118673	60
NZ75+79	AGCGTGAT	AGCGTGAT	0	0	0	0	0	0	1042505	1	1042505	0	0	519968	0.498768	522537	0.501232	135	0.000129496	0	0	0	0	0	0	0	0	0	0	0	3099203842	237019319	61453644	60839379	0.990004	614265	0.00999558	25236	0.000410651	0.733436	24065	0.000391596	0.939165	43071	0.00070087	0	0	0.0114987	60
NZ75+79	AGCGTTCG	AGCGTTCG	0	0	0	0	0	0	754022	1	754022	0	0	377272	0.500346	376750	0.499654	1601	0.00212328	0	0	0	0	0	0	0	0	0	0	0	3099014686	237019319	44032702	43652418	0.991364	380284	0.0086364	17588	0.00039943	0.725722	16957	0.0003851	0.928171	54296	0.00123308	0	0	0.010654	60
NZ75+79	ATGTGCGC	ATGTGCGC	0	0	0	0	0	0	415201	1	415201	0	0	207638	0.50009	207563	0.49991	1629	0.0039234	0	0	0	0	0	0	0	0	0	0	0	3098791871	237019319	23981466	23809117	0.992813	172349	0.00718676	8465	0.000352981	0.703721	9062	0.000377875	0.925292	44723	0.0018649	0	0	0.00978251	60
NZ75+79	ATGTGGAG	ATGTGGAG	0	0	0	0	0	0	1585600	1	1585600	0	0	794160	0.500858	791440	0.499142	2618	0.00165111	0	0	0	0	0	0	0	0	0	0	0	3099738846	237019319	92820967	91916137	0.990252	904830	0.00974812	34264	0.000369141	0.707215	34078	0.000367137	0.929632	105874	0.00114063	0	0	0.011625	60
NZ75+79	ATGTGTCA	ATGTGTCA	0	0	0	0	0	0	199272	1	199272	0	0	99699	0.500316	99573	0.499684	41	0.000205749	0	0	0	0	0	0	0	0	0	0	0	3098866677	237019319	11729766	11613186	0.990061	116580	0.00993882	3858	0.000328907	0.701918	3594	0.0003064	0.924318	9712	0.000827979	0	0	0.0114021	60
NZ75+79	ATTCGATC	ATTCGATC	0	0	0	0	0	0	973394	1	973394	0	0	485958	0.499241	487436	0.500759	1691	0.00173722	0	0	0	0	0	0	0	0	0	0	0	3099276126	237019319	56925565	56381019	0.990434	544546	0.00956593	19443	0.000341551	0.699326	18350	0.000322351	0.924414	65160	0.00114465	0	0	0.0113745	60
NZ75+79	ATTCGCGA	ATTCGCGA	0	0	0	0	0	0	703818	1	703818	0	0	350352	0.497788	353466	0.502212	129	0.000183286	0	0	0	0	0	0	0	0	0	0	0	3098799368	237019319	41379469	40953302	0.989701	426167	0.010299	15471	0.000373881	0.721931	14890	0.00035984	0.931699	39153	0.000946194	0	0	0.0119789	60
NZ75+79	ATTCGGAT	ATTCGGAT	0	0	0	0	0	0	397058	1	397058	0	0	198688	0.5004	198370	0.4996	942	0.00237245	0	0	0	0	0	0	0	0	0	0	0	3098931644	237019319	23093120	22911604	0.99214	181516	0.00786018	8454	0.000366083	0.718713	8754	0.000379074	0.927119	33158	0.00143584	0	0	0.0100412	60
NZ75+79	ATTCGTCG	ATTCGTCG	0	0	0	0	0	0	610670	1	610670	0	0	304932	0.49934	305738	0.50066	768	0.00125764	0	0	0	0	0	0	0	0	0	0	0	3098290056	237019319	35783170	35504207	0.992204	278963	0.00779593	15150	0.000423383	0.746667	14139	0.00039513	0.926727	36860	0.00103009	0	0	0.00964453	60
NZ75+79	CACTGATC	CACTGATC	0	0	0	0	0	0	261878	1	261878	0	0	131473	0.502039	130405	0.497961	829	0.0031656	0	0	0	0	0	0	0	0	0	0	0	3098697419	237019319	15185255	15062387	0.991909	122868	0.00809127	6491	0.000427454	0.711293	6057	0.000398874	0.924715	25667	0.00169026	0	0	0.0106079	60
NZ75+79	CACTGCGA	CACTGCGA	0	0	0	0	0	0	398747	1	398747	0	0	198819	0.498609	199928	0.501391	541	0.00135675	0	0	0	0	0	0	0	0	0	0	0	3098719143	237019319	23397475	23150426	0.989441	247049	0.0105588	8791	0.000375724	0.710499	8212	0.000350978	0.929737	23155	0.000989637	0	0	0.0122751	60
NZ75+79	CAGTCATC	CAGTCATC	0	0	0	0	0	0	660911	1	660911	0	0	330805	0.500529	330106	0.499471	1412	0.00213644	0	0	0	0	0	0	0	0	0	0	0	3099543636	237019319	38572178	38283830	0.992524	288348	0.00747554	12879	0.000333894	0.690815	13594	0.00035243	0.93019	44964	0.00116571	0	0	0.00932758	60
NZ75+79	CAGTCCGA	CAGTCCGA	0	0	0	0	0	0	513828	1	513828	0	0	258257	0.502614	255571	0.497386	189	0.000367827	0	0	0	0	0	0	0	0	0	0	0	3098510718	237019319	30252012	29942203	0.989759	309809	0.0102409	12294	0.000406386	0.748902	11549	0.00038176	0.935406	24901	0.000823119	0	0	0.0118522	60
NZ75+79	CAGTCGAT	CAGTCGAT	0	0	0	0	0	0	304717	1	304717	0	0	152264	0.49969	152453	0.50031	968	0.00317672	0	0	0	0	0	0	0	0	0	0	0	3098457200	237019319	17677511	17536282	0.992011	141229	0.00798919	7061	0.000399434	0.711372	6473	0.000366171	0.92909	28455	0.00160967	0	0	0.0103645	60
NZ75+79	CAGTCTCG	CAGTCTCG	0	0	0	0	0	0	334711	1	334711	0	0	166891	0.498612	167820	0.501388	169	0.000504913	0	0	0	0	0	0	0	0	0	0	0	3098366948	237019319	19683110	19464546	0.988896	218564	0.0111041	7244	0.000368031	0.703479	6358	0.000323018	0.919786	19059	0.000968292	0	0	0.0127635	60
NZ75+79	CATCAATC	CATCAATC	0	0	0	0	0	0	348297	1	348297	0	0	172862	0.496306	175435	0.503694	120	0.000344534	0	0	0	0	0	0	0	0	0	0	0	3098644975	237019319	20475420	20316941	0.99226	158479	0.00773996	9278	0.000453129	0.76288	8503	0.000415278	0.921322	17109	0.000835587	0	0	0.00944396	60
NZ75+79	CATCACGC	CATCACGC	0	0	0	0	0	0	1350682	1	1350682	0	0	676915	0.501165	673767	0.498835	1547	0.00114535	0	0	0	0	0	0	0	0	0	0	0	3099325010	237019319	79172363	78383185	0.990032	789178	0.00996785	32383	0.000409019	0.734274	30410	0.000384099	0.925156	82739	0.00104505	0	0	0.011806	60
NZ75+79	CATCAGAA	CATCAGAA	0	0	0	0	0	0	91014	1	91014	0	0	45566	0.500648	45448	0.499352	157	0.00172501	0	0	0	0	0	0	0	0	0	0	0	3098007271	237019319	5258856	5213038	0.991287	45818	0.00871254	1796	0.000341519	0.715479	1853	0.000352358	0.914193	9950	0.00189205	0	0	0.0112985	60
NZ75+79	CATCATCC	CATCATCC	0	0	0	0	0	0	766310	1	766310	0	0	382789	0.499522	383521	0.500478	1276	0.00166512	0	0	0	0	0	0	0	0	0	0	0	3098894654	237019319	44844485	44347734	0.988923	496751	0.0110772	16551	0.000369075	0.714579	15209	0.00033915	0.925768	53011	0.00118211	0	0	0.0129675	60
NZ75+79	CGGATATC	CGGATATC	0	0	0	0	0	0	146084	1	146084	0	0	72370	0.4954	73714	0.5046	25	0.000171134	0	0	0	0	0	0	0	0	0	0	0	3098015646	237019319	8577636	8508213	0.991907	69423	0.00809349	3849	0.000448725	0.725903	3466	0.000404074	0.929602	8627	0.00100575	0	0	0.00995204	60
NZ75+79	CGGATCGA	CGGATCGA	0	0	0	0	0	0	891505	1	891505	0	0	442497	0.496348	449008	0.503652	541	0.000606839	0	0	0	0	0	0	0	0	0	0	0	3098019868	237019319	52386094	51970469	0.992066	415625	0.00793388	23525	0.00044907	0.750436	23542	0.000449394	0.940532	45331	0.000865325	0	0	0.00969767	60
NZ75+79	CGGATGAT	CGGATGAT	0	0	0	0	0	0	115439	1	115439	0	0	57759	0.500342	57680	0.499658	23	0.000199239	0	0	0	0	0	0	0	0	0	0	0	3039408164	200630282	6807806	6739262	0.989932	68544	0.0100684	2374	0.000348717	0.707245	2464	0.000361937	0.928571	4723	0.000693762	0	0	0.0114729	60
NZ75+79	CGGATTCG	CGGATTCG	0	0	0	0	0	0	339471	1	339471	0	0	169121	0.49819	170350	0.50181	760	0.00223878	0	0	0	0	0	0	0	0	0	0	0	3098905698	237019319	19744550	19586083	0.991974	158467	0.00802586	6939	0.000351439	0.70111	7014	0.000355237	0.933561	27962	0.00141619	0	0	0.0101487	60
NZ75+79	CGTGTCGC	CGTGTCGC	0	0	0	0	0	0	424836	1	424836	0	0	212325	0.499781	212511	0.500219	1625	0.00382501	0	0	0	0	0	0	0	0	0	0	0	3098992522	237019319	24600295	24407223	0.992152	193072	0.00784836	8820	0.000358532	0.707029	8750	0.000355687	0.9264	41526	0.00168803	0	0	0.0102506	60
NZ75+79	CGTGTGAG	CGTGTGAG	0	0	0	0	0	0	1091728	1	1091728	0	0	546746	0.500808	544982	0.499192	2100	0.00192356	0	0	0	0	0	0	0	0	0	0	0	3099058387	237019319	63832048	63195593	0.990029	636455	0.00997078	22808	0.000357313	0.713785	22381	0.000350623	0.922658	77954	0.00122124	0	0	0.0118999	60
NZ75+79	CGTGTTCA	CGTGTTCA	0	0	0	0	0	0	485506	1	485506	0	0	241419	0.497252	244087	0.502748	838	0.00172603	0	0	0	0	0	0	0	0	0	0	0	3098260102	237019319	28378797	28146189	0.991803	232608	0.00819654	12255	0.000431836	0.710078	10599	0.000373483	0.934711	34501	0.00121573	0	0	0.0102176	60
NZ75+79	CTAACCGC	CTAACCGC	0	0	0	0	0	0	704910	1	704910	0	0	351439	0.498559	353471	0.501441	118	0.000167397	0	0	0	0	0	0	0	0	0	0	0	3098555617	237019319	41600634	41114179	0.988307	486455	0.0116935	16269	0.000391076	0.729854	13136	0.000315764	0.924406	28952	0.000695951	0	0	0.0130962	60
NZ75+79	CTAACGAG	CTAACGAG	0	0	0	0	0	0	609142	1	609142	0	0	305067	0.500814	304075	0.499186	1974	0.00324062	0	0	0	0	0	0	0	0	0	0	0	3099227788	237019319	35296155	35005058	0.991753	291097	0.00824727	12272	0.000347687	0.699804	12546	0.000355449	0.927228	58985	0.00167115	0	0	0.0106216	60
NZ75+79	CTAACTCA	CTAACTCA	0	0	0	0	0	0	1164526	1	1164526	0	0	586355	0.503514	578171	0.496486	134	0.000115068	0	0	0	0	0	0	0	0	0	0	0	3099472461	237019319	68674061	67801573	0.987295	872488	0.0127048	25219	0.000367227	0.715453	23370	0.000340303	0.922037	51869	0.000755292	0	0	0.0141676	60
NZ75+79	CTATGATC	CTATGATC	0	0	0	0	0	0	16109	1	16109	0	0	8075	0.501273	8034	0.498727	6	0.000372463	0	0	0	0	0	0	0	0	0	0	0	3037373153	200630282	942664	931207	0.987846	11457	0.0121539	357	0.000378714	0.72549	316	0.00033522	0.936709	1028	0.00109053	0	0	0.0139583	60
NZ75+79	CTATGCGA	CTATGCGA	0	0	0	0	0	0	1045279	1	1045279	0	0	521714	0.499115	523565	0.500885	152	0.000145416	0	0	0	0	0	0	0	0	0	0	0	3098106870	237019319	61668885	60916984	0.987807	751901	0.0121926	22976	0.00037257	0.729457	21382	0.000346723	0.927041	45111	0.000731503	0	0	0.0136433	60
NZ75+79	CTATGGAT	CTATGGAT	0	0	0	0	0	0	1639326	1	1639326	0	0	819800	0.500084	819526	0.499916	1223	0.000746038	0	0	0	0	0	0	0	0	0	0	0	3099167467	237019319	96277757	95350550	0.990369	927207	0.00963054	41539	0.00043145	0.745516	38579	0.000400705	0.927707	89868	0.000933424	0	0	0.0113961	60
NZ75+79	CTATGTCG	CTATGTCG	0	0	0	0	0	0	487510	1	487510	0	0	243938	0.500375	243572	0.499625	108	0.000221534	0	0	0	0	0	0	0	0	0	0	0	3098748806	237019319	28746690	28409062	0.988255	337628	0.0117449	10402	0.00036185	0.726206	9149	0.000318263	0.920975	21222	0.000738242	0	0	0.0131633	60
NZ75+79	GAATCATC	GAATCATC	0	0	0	0	0	0	55253	1	55253	0	0	27303	0.494145	27950	0.505855	19	0.000343873	0	0	0	0	0	0	0	0	0	0	0	3098493599	237019319	3242408	3201369	0.987343	41039	0.012657	911	0.000280964	0.692645	994	0.000306562	0.920523	3054	0.000941893	0	0	0.0141864	60
NZ75+79	GAATCCGA	GAATCCGA	0	0	0	0	0	0	806555	1	806555	0	0	404652	0.501704	401903	0.498296	1767	0.0021908	0	0	0	0	0	0	0	0	0	0	0	3098654821	237019319	46980432	46601703	0.991939	378729	0.00806142	20351	0.00043318	0.736229	18825	0.000400699	0.933333	63596	0.00135367	0	0	0.010249	60
NZ75+79	GAATCGAT	GAATCGAT	0	0	0	0	0	0	7068	1	7068	0	0	3748	0.530277	3320	0.469723	4	0.000565931	0	0	0	0	0	0	0	0	0	0	0	3096035476	237019319	413566	408764	0.988389	4802	0.0116112	174	0.000420731	0.747126	244	0.00058999	0.963115	443	0.00107117	0	0	0.0136931	60
NZ75+79	GAATCTCG	GAATCTCG	0	0	0	0	0	0	739195	1	739195	0	0	367604	0.497303	371591	0.502697	318	0.000430198	0	0	0	0	0	0	0	0	0	0	0	3097787629	237019319	43401412	43054429	0.992005	346983	0.00799474	19047	0.000438857	0.734866	18406	0.000424088	0.926654	40867	0.000941605	0	0	0.00979929	60
NZ75+79	GACACCGC	GACACCGC	0	0	0	0	0	0	127455	1	127455	0	0	64491	0.50599	62964	0.49401	23	0.000180456	0	0	0	0	0	0	0	0	0	0	0	3098593818	237019319	7495250	7410623	0.988709	84627	0.0112908	2600	0.000346886	0.705385	2469	0.000329409	0.910895	6527	0.000870818	0	0	0.0128379	60
NZ75+79	GACACGAG	GACACGAG	0	0	0	0	0	0	138776	1	138776	0	0	69498	0.500793	69278	0.499207	100	0.000720586	0	0	0	0	0	0	0	0	0	0	0	3098676171	237019319	8082103	8009181	0.990977	72922	0.00902265	2837	0.000351022	0.726119	3044	0.000376635	0.914586	10623	0.00131439	0	0	0.0110647	60
NZ75+79	GACACTCA	GACACTCA	0	0	0	0	0	0	569112	1	569112	0	0	284188	0.499353	284924	0.500647	2420	0.00425224	0	0	0	0	0	0	0	0	0	0	0	3099046021	237019419	32891897	32621621	0.991783	270276	0.0082171	10675	0.000324548	0.666511	10927	0.000332209	0.916171	58977	0.00179306	0	0	0.0106669	60
NZ75+79	GCTCAATC	GCTCAATC	0	0	0	0	0	0	10285	1	10285	0	0	5241	0.509577	5044	0.490423	1	9.7229e-05	0	0	0	0	0	0	0	0	0	0	0	3096475812	237019319	603453	596384	0.988286	7069	0.0117143	177	0.000293312	0.711864	189	0.000313198	0.931217	662	0.00109702	0	0	0.0134178	60
NZ75+79	GCTCACGA	GCTCACGA	0	0	0	0	0	0	809845	1	809845	0	0	408011	0.503814	401834	0.496186	174	0.000214856	0	0	0	0	0	0	0	0	0	0	0	3099379671	237019419	47646842	47189776	0.990407	457066	0.00959279	18719	0.00039287	0.736044	18322	0.000384538	0.9124	40631	0.000852753	0	0	0.0112229	60
NZ75+79	GCTCAGAT	GCTCAGAT	0	0	0	0	0	0	37144	1	37144	0	0	18659	0.502342	18485	0.497658	3	8.07667e-05	0	0	0	0	0	0	0	0	0	0	0	3096996683	237019319	2180980	2161754	0.991185	19226	0.0088153	738	0.00033838	0.681572	694	0.000318206	0.929395	2235	0.00102477	0	0	0.0104967	60
NZ75+79	GCTCATCG	GCTCATCG	0	0	0	0	0	0	642592	1	642592	0	0	321489	0.5003	321103	0.4997	957	0.00148928	0	0	0	0	0	0	0	0	0	0	0	3099018339	237019319	37616132	37231369	0.989771	384763	0.0102287	14396	0.000382708	0.72277	13214	0.000351285	0.925004	41980	0.00111601	0	0	0.0120787	60
NZ75+79	GCTTGCGC	GCTTGCGC	0	0	0	0	0	0	315684	1	315684	0	0	157700	0.49955	157984	0.50045	101	0.00031994	0	0	0	0	0	0	0	0	0	0	0	3098499578	237019319	18561730	18359600	0.98911	202130	0.0108896	6236	0.00033596	0.722739	5540	0.000298464	0.92509	16169	0.000871093	0	0	0.0123951	60
NZ75+79	GCTTGGAG	GCTTGGAG	0	0	0	0	0	0	185314	1	185314	0	0	92236	0.497728	93078	0.502272	93	0.000501851	0	0	0	0	0	0	0	0	0	0	0	3099301359	237019319	10859345	10772535	0.992006	86810	0.00799404	3783	0.000348364	0.691779	4056	0.000373503	0.926036	10652	0.000980906	0	0	0.00969681	60
NZ75+79	GCTTGTCA	GCTTGTCA	0	0	0	0	0	0	613978	1	613978	0	0	308381	0.502267	305597	0.497733	225	0.000366463	0	0	0	0	0	0	0	0	0	0	0	3098262242	237019319	36124928	35811318	0.991319	313610	0.00868126	15492	0.000428845	0.745417	14941	0.000413593	0.933338	27970	0.000774258	0	0	0.010298	60
NZ75+79	GTACGATC	GTACGATC	0	0	0	0	0	0	121700	1	121700	0	0	60919	0.500567	60781	0.499433	25	0.000205423	0	0	0	0	0	0	0	0	0	0	0	3097884669	237019319	7157041	7094228	0.991224	62813	0.00877639	3011	0.000420705	0.700432	2696	0.000376692	0.916172	6528	0.000912109	0	0	0.0104859	60
NZ75+79	GTACGCGA	GTACGCGA	0	0	0	0	0	0	358602	1	358602	0	0	178065	0.496553	180537	0.503447	339	0.000945338	0	0	0	0	0	0	0	0	0	0	0	3098877094	237019319	21033645	20806662	0.989209	226983	0.0107914	7166	0.000340692	0.712252	7057	0.00033551	0.926314	22185	0.00105474	0	0	0.0125224	60
NZ75+79	GTACGGAT	GTACGGAT	0	0	0	0	0	0	178852	1	178852	0	0	89377	0.499726	89475	0.500274	33	0.00018451	0	0	0	0	0	0	0	0	0	0	0	3098564307	237019319	10519654	10425167	0.991018	94487	0.00898195	3606	0.000342787	0.68802	3605	0.000342692	0.921498	8803	0.000836815	0	0	0.0105042	60
NZ75+79	GTACGTCG	GTACGTCG	0	0	0	0	0	0	506830	1	506830	0	0	253601	0.500367	253229	0.499633	1299	0.00256299	0	0	0	0	0	0	0	0	0	0	0	3099065776	237019319	29514662	29221942	0.990082	292720	0.00991778	10735	0.000363718	0.697718	10378	0.000351622	0.92513	43731	0.00148167	0	0	0.0121148	60
NZ75+79	GTCGTATC	GTCGTATC	0	0	0	0	0	0	223917	1	223917	0	0	112433	0.502119	111484	0.497881	751	0.00335392	0	0	0	0	0	0	0	0	0	0	0	3098497948	237019319	12971478	12870665	0.992228	100813	0.0077719	5502	0.000424161	0.721192	5291	0.000407895	0.936118	22241	0.00171461	0	0	0.0103186	60
NZ75+79	GTCGTCGC	GTCGTCGC	0	0	0	0	0	0	289042	1	289042	0	0	144983	0.501598	144059	0.498402	35	0.00012109	0	0	0	0	0	0	0	0	0	0	0	3098584362	237019319	17034639	16824611	0.987671	210028	0.0123295	5993	0.000351813	0.699816	5751	0.000337606	0.925404	14470	0.000849446	0	0	0.0138683	60
NZ75+79	GTCGTGAA	GTCGTGAA	0	0	0	0	0	0	150752	1	150752	0	0	74977	0.497353	75775	0.502647	684	0.00453725	0	0	0	0	0	0	0	0	0	0	0	3098468097	237019319	8684581	8608226	0.991208	76355	0.00879202	3079	0.000354536	0.709971	3107	0.00035776	0.922433	17897	0.00206078	0	0	0.0115651	60
NZ75+79	GTCGTTCC	GTCGTTCC	0	0	0	0	0	0	422186	1	422186	0	0	211331	0.500564	210855	0.499436	994	0.00235441	0	0	0	0	0	0	0	0	0	0	0	3099313893	237019319	24599882	24340912	0.989473	258970	0.0105273	8890	0.000361384	0.703375	8443	0.000343213	0.923842	35522	0.00144399	0	0	0.0126759	60
NZ75+79	GTGCAATC	GTGCAATC	0	0	0	0	0	0	186002	1	186002	0	0	92895	0.49943	93107	0.50057	37	0.000198923	0	0	0	0	0	0	0	0	0	0	0	3098468747	237019319	10913364	10805574	0.990123	107790	0.00987688	3589	0.000328863	0.687935	3416	0.000313011	0.911885	11859	0.00108665	0	0	0.0116054	60
NZ75+79	GTGCACGA	GTGCACGA	0	0	0	0	0	0	353915	1	353915	0	0	177484	0.501488	176431	0.498512	1096	0.00309679	0	0	0	0	0	0	0	0	0	0	0	3098611055	237019319	20570859	20380952	0.990768	189907	0.00923185	8102	0.000393858	0.719452	7809	0.000379615	0.906134	31003	0.00150713	0	0	0.0115125	60
NZ75+79	TAGACATC	TAGACATC	0	0	0	0	0	0	886701	1	886701	0	0	441586	0.49801	445115	0.50199	2197	0.00247772	0	0	0	0	0	0	0	0	0	0	0	3099370071	237019319	51629513	51231621	0.992293	397892	0.00770668	22893	0.000443409	0.717206	21410	0.000414685	0.935404	71747	0.00138965	0	0	0.00995442	60
NZ75+79	TAGACCGA	TAGACCGA	0	0	0	0	0	0	1613773	1	1613773	0	0	808177	0.5008	805596	0.4992	2193	0.00135893	0	0	0	0	0	0	0	0	0	0	0	3099521064	237019319	94538270	93572108	0.98978	966162	0.0102198	39190	0.000414541	0.716356	35824	0.000378936	0.929126	103660	0.00109649	0	0	0.0121098	60
NZ75+79	TAGACGAT	TAGACGAT	0	0	0	0	0	0	198655	1	198655	0	0	99215	0.499434	99440	0.500566	245	0.00123329	0	0	0	0	0	0	0	0	0	0	0	3098663724	237019319	11618676	11516361	0.991194	102315	0.00880608	4632	0.000398668	0.733808	4669	0.000401853	0.926108	12864	0.00110718	0	0	0.0107138	60
NZ75+79	TAGACTCG	TAGACTCG	0	0	0	0	0	0	589368	1	589368	0	0	294118	0.49904	295250	0.50096	1315	0.0022312	0	0	0	0	0	0	0	0	0	0	0	3098564307	237019319	34366818	34011418	0.989659	355400	0.0103414	12151	0.000353568	0.713522	11435	0.000332734	0.922956	47996	0.00139658	0	0	0.0124243	60
NZ75+79	TAGGTCGC	TAGGTCGC	0	0	0	0	0	0	139785	1	139785	0	0	69171	0.494839	70614	0.505161	33	0.000236077	0	0	0	0	0	0	0	0	0	0	0	3098378389	237019419	8222059	8156908	0.992076	65151	0.00792393	2795	0.000339939	0.706977	2795	0.000339939	0.932737	6951	0.000845409	0	0	0.00944921	60
NZ75+79	TAGGTGAG	TAGGTGAG	0	0	0	0	0	0	92835	1	92835	0	0	46569	0.501632	46266	0.498368	15	0.000161577	0	0	0	0	0	0	0	0	0	0	0	3097778902	237019319	5464856	5414156	0.990723	50700	0.00927746	1798	0.000329011	0.697442	1864	0.000341089	0.901824	4500	0.000823443	0	0	0.010771	60
NZ75+79	TAGGTTCA	TAGGTTCA	0	0	0	0	0	0	705131	1	705131	0	0	351928	0.499096	353203	0.500904	170	0.00024109	0	0	0	0	0	0	0	0	0	0	0	3098751311	237019319	41468333	41098955	0.991093	369378	0.00890747	16949	0.000408722	0.735206	17009	0.000410168	0.923629	34551	0.00083319	0	0	0.0105596	60
NZ75+79	TCACACGC	TCACACGC	0	0	0	0	0	0	367826	1	367826	0	0	184489	0.501566	183337	0.498434	1283	0.00348806	0	0	0	0	0	0	0	0	0	0	0	3099088259	237019319	21325156	21159107	0.992213	166049	0.00778653	7839	0.000367594	0.714887	7843	0.000367782	0.927196	34378	0.00161209	0	0	0.010134	60
NZ75+79	TCACAGAG	TCACAGAG	0	0	0	0	0	0	275512	1	275512	0	0	137745	0.49996	137767	0.50004	57	0.000206888	0	0	0	0	0	0	0	0	0	0	0	3097764880	237019319	16202324	16008362	0.988029	193962	0.0119712	5034	0.000310696	0.680373	4624	0.000285391	0.910035	15354	0.000947642	0	0	0.013515	60
NZ75+79	TCACATCA	TCACATCA	0	0	0	0	0	0	1224614	1	1224614	0	0	614247	0.501584	610367	0.498416	208	0.000169849	0	0	0	0	0	0	0	0	0	0	0	3098795065	237019319	72176824	71355429	0.98862	821395	0.0113803	28406	0.000393561	0.745652	25835	0.00035794	0.930753	56100	0.000777258	0	0	0.0129091	60
NZ75+79	TCCGAATC	TCCGAATC	0	0	0	0	0	0	1022150	1	1022150	0	0	509360	0.498322	512790	0.501678	1598	0.00156337	0	0	0	0	0	0	0	0	0	0	0	3098898664	237019419	59676015	59169326	0.991509	506689	0.00849066	25682	0.000430357	0.733198	22117	0.000370618	0.929737	75018	0.00125709	0	0	0.0105487	60
NZ75+79	TCCGACGA	TCCGACGA	0	0	0	0	0	0	84061	1	84061	0	0	42316	0.503396	41745	0.496604	28	0.000333091	0	0	0	0	0	0	0	0	0	0	0	3098242892	237019319	4931016	4872093	0.988051	58923	0.0119495	1527	0.000309672	0.707269	1477	0.000299533	0.901828	5326	0.0010801	0	0	0.0136388	60
NZ75+79	TCCGAGAT	TCCGAGAT	0	0	0	0	0	0	723366	1	723366	0	0	364565	0.503984	358801	0.496016	138	0.000190775	0	0	0	0	0	0	0	0	0	0	0	3097430969	237019319	42463410	42150855	0.992639	312555	0.00736057	18748	0.00044151	0.736772	19103	0.00044987	0.942993	34011	0.000800948	0	0	0.0090529	60
NZ75+79	TCCGATCG	TCCGATCG	0	0	0	0	0	0	1253016	1	1253016	0	0	629150	0.502109	623866	0.497891	511	0.000407816	0	0	0	0	0	0	0	0	0	0	0	3098768124	237019319	73707562	73065235	0.991285	642327	0.00871453	30964	0.000420093	0.739246	29389	0.000398724	0.93222	59656	0.000809361	0	0	0.0103427	60
NZ75+79	TGATGATC	TGATGATC	0	0	0	0	0	0	104925	1	104925	0	0	52704	0.502302	52221	0.497698	20	0.000190612	0	0	0	0	0	0	0	0	0	0	0	3097568648	237019319	6161800	6111463	0.991831	50337	0.0081692	1984	0.000321984	0.694052	2202	0.000357363	0.921435	5246	0.000851375	0	0	0.00969993	60
NZ75+79	TGATGCGC	TGATGCGC	0	0	0	0	0	0	898747	1	898747	0	0	451151	0.501978	447596	0.498022	769	0.000855636	0	0	0	0	0	0	0	0	0	0	0	3098752049	237019319	52821551	52335174	0.990792	486377	0.00920793	21785	0.000412426	0.744457	21281	0.000402885	0.932757	46415	0.000878713	0	0	0.010902	60
NZ75+79	TGATGGAA	TGATGGAA	0	0	0	0	0	0	254813	1	254813	0	0	127326	0.499684	127487	0.500316	43	0.000168751	0	0	0	0	0	0	0	0	0	0	0	3098806448	237019319	14965397	14838661	0.991531	126736	0.0084686	6123	0.000409144	0.707823	6021	0.000402328	0.931905	14845	0.000991955	0	0	0.010272	60
NZ75+79	TGATGTCC	TGATGTCC	0	0	0	0	0	0	152708	1	152708	0	0	76397	0.500282	76311	0.499718	37	0.000242292	0	0	0	0	0	0	0	0	0	0	0	3098783261	237019319	8971125	8858699	0.987468	112426	0.012532	2896	0.000322813	0.688536	2507	0.000279452	0.908257	10033	0.00111837	0	0	0.0142526	60
NZ75+79	TGCATATC	TGCATATC	0	0	0	0	0	0	845493	1	845493	0	0	422256	0.49942	423237	0.50058	2405	0.00284449	0	0	0	0	0	0	0	0	0	0	0	3099384522	237019319	49211845	48788357	0.991395	423488	0.00860541	17162	0.000348737	0.719788	17367	0.000352903	0.929637	69310	0.0014084	0	0	0.0107154	60
NZ75+79	TGCATCGA	TGCATCGA	0	0	0	0	0	0	256454	1	256454	0	0	127876	0.498631	128578	0.501369	1026	0.00400072	0	0	0	0	0	0	0	0	0	0	0	3098616892	237019419	14836614	14707342	0.991287	129272	0.00871304	4587	0.000309168	0.658382	4675	0.000315099	0.922353	27103	0.00182676	0	0	0.0111641	60
NZ75+79	TGCATGAT	TGCATGAT	0	0	0	0	0	0	600686	1	600686	0	0	299283	0.498235	301403	0.501765	1671	0.00278182	0	0	0	0	0	0	0	0	0	0	0	3099481850	237019319	34788303	34475374	0.991005	312929	0.00899524	13182	0.00037892	0.698301	12353	0.000355091	0.916862	68769	0.00197679	0	0	0.011706	60
NZ75+79	TGCATTCG	TGCATTCG	0	0	0	0	0	0	344373	1	344373	0	0	172260	0.500213	172113	0.499787	831	0.00241308	0	0	0	0	0	0	0	0	0	0	0	3098053008	237019319	20050811	19901522	0.992554	149289	0.00744553	9107	0.000454196	0.71758	8613	0.000429559	0.933705	28302	0.00141151	0	0	0.0097408	60
NZ75+79	TGTACATC	TGTACATC	0	0	0	0	0	0	419306	1	419306	0	0	209746	0.500222	209560	0.499778	172	0.000410202	0	0	0	0	0	0	0	0	0	0	0	3099149552	237019319	24648272	24441840	0.991625	206432	0.00837511	10230	0.000415039	0.724438	9836	0.000399054	0.930256	21551	0.000874341	0	0	0.0100635	60
NZ75+79	TGTACCGA	TGTACCGA	0	0	0	0	0	0	681936	1	681936	0	0	341874	0.501329	340062	0.498671	1164	0.00170691	0	0	0	0	0	0	0	0	0	0	0	3098673003	237019319	39883247	39464138	0.989492	419109	0.0105084	16502	0.000413758	0.728215	14173	0.000355362	0.929514	47070	0.00118019	0	0	0.0124577	60
[truncated: 9 more columns]

## Sheet: BICRO229
Supplementary Table 1. Summary of sequencing runs.
Seq_library	Sample	Library	#QCFail	QCFailFraction	#DuplicateMarked	DuplicateFraction	#Unmapped	UnmappedFraction	#Mapped	MappedFraction	#MappedRead1	#MappedRead2	RatioMapped2vsMapped1	#MappedForward	MappedForwardFraction	#MappedReverse	MappedReverseFraction	#SecondaryAlignments	SecondaryAlignmentFraction	#SupplementaryAlignments	SupplementaryAlignmentFraction	#SplicedAlignments	SplicedAlignmentFraction	#Pairs	#MappedPairs	MappedPairsFraction	#MappedSameChr	MappedSameChrFraction	#MappedProperPair	MappedProperFraction	#ReferenceBp	#ReferenceNs	#AlignedBases	#MatchedBases	MatchRate	#MismatchedBases	MismatchRate	#DeletionsCigarD	DeletionRate	HomopolymerContextDel	#InsertionsCigarI	InsertionRate	HomopolymerContextIns	#SoftClippedCigarS	SoftClipRate	#HardClippedCigarH	HardClipRate	ErrorRate	MedianReadLength
NZ74	ACAGTATC	ACAGTATC	0	0	0	0	0	0	1280269	1	1280269	0	0	641288	0.500901	638981	0.499099	358	0.000279629	0	0	0	0	0	0	0	0	0	0	0	3099804167	237019419	70198499	69816813	0.994563	381686	0.00543724	24657	0.000351247	0.703208	22700	0.000323369	0.912203	68500	0.000975804	0	0	0.00708766	56
NZ74	ACAGTCGA	ACAGTCGA	0	0	0	0	0	0	1100740	1	1100740	0	0	548993	0.498749	551747	0.501251	259	0.000235296	0	0	0	0	0	0	0	0	0	0	0	3099609168	237019319	60445759	60135934	0.994874	309825	0.00512567	19698	0.000325879	0.703676	19644	0.000324986	0.916005	51712	0.000855511	0	0	0.00663205	56
NZ74	ACGACATC	ACGACATC	0	0	0	0	0	0	2301234	1	2301234	0	0	1150836	0.500095	1150398	0.499905	3967	0.00172386	0	0	0	0	0	0	0	0	0	0	0	3099327852	237019319	123790702	123143197	0.994769	647505	0.00523064	40406	0.000326406	0.702891	38887	0.000314135	0.913802	271086	0.00218987	0	0	0.00806106	56
NZ74	ACGACCGC	ACGACCGC	0	0	0	0	0	0	1671775	1	1671775	0	0	835324	0.499663	836451	0.500337	2907	0.00173887	0	0	0	0	0	0	0	0	0	0	0	3099406283	237019319	89908627	89462288	0.995036	446339	0.00496436	28872	0.000321126	0.706394	28833	0.000320692	0.916901	198877	0.00221199	0	0	0.00781817	56
NZ74	ACGACGAA	ACGACGAA	0	0	0	0	0	0	1806843	1	1806843	0	0	901900	0.499158	904943	0.500842	2564	0.00141905	0	0	0	0	0	0	0	0	0	0	0	3099021188	237019319	97446304	96924504	0.994645	521800	0.00535474	34418	0.0003532	0.712825	33353	0.000342271	0.916199	196949	0.0020211	0	0	0.00807132	56
NZ74	ACGACTCC	ACGACTCC	0	0	0	0	0	0	2219121	1	2219121	0	0	1108916	0.49971	1110205	0.50029	2906	0.00130953	0	0	0	0	0	0	0	0	0	0	0	3099336050	237019319	119885181	119238880	0.994609	646301	0.005391	41935	0.000349793	0.707261	37984	0.000316836	0.916965	230863	0.0019257	0	0	0.00798333	56
NZ74	ACTGAATC	ACTGAATC	0	0	0	0	0	0	4247400	1	4247400	0	0	2121553	0.499495	2125847	0.500505	2791	0.000657108	0	0	0	0	0	0	0	0	0	0	0	3099601172	237019319	231679952	230432755	0.994617	1247197	0.00538328	82404	0.00035568	0.709626	71585	0.000308982	0.91325	291195	0.00125688	0	0	0.00730482	56
NZ74	ACTGACGA	ACTGACGA	0	0	0	0	0	0	1305844	1	1305844	0	0	652266	0.499498	653578	0.500502	398	0.000304784	0	0	0	0	0	0	0	0	0	0	0	3099607212	237019319	71645436	71288807	0.995022	356629	0.00497769	23095	0.000322351	0.70171	23672	0.000330405	0.920243	63778	0.000890189	0	0	0.00652064	56
NZ74	ACTGAGAT	ACTGAGAT	0	0	0	0	0	0	1038997	1	1038997	0	0	519265	0.499775	519732	0.500225	570	0.000548606	0	0	0	0	0	0	0	0	0	0	0	3099334556	237019319	56784245	56484864	0.994728	299381	0.00527225	21120	0.000371934	0.705919	19507	0.000343528	0.911621	66855	0.00117735	0	0	0.00716507	56
NZ74	ACTGATCG	ACTGATCG	0	0	0	0	0	0	2421928	1	2421928	0	0	1212576	0.500666	1209352	0.499334	392	0.000161855	0	0	0	0	0	0	0	0	0	0	0	3099068994	237019319	133211044	132490834	0.994593	720210	0.00540653	52949	0.000397482	0.731402	48844	0.000366666	0.91911	101921	0.000765109	0	0	0.00693579	56
NZ74	AGCCACGC	AGCCACGC	0	0	0	0	0	0	4378147	1	4378147	0	0	2190139	0.500243	2188008	0.499757	5134	0.00117264	0	0	0	0	0	0	0	0	0	0	0	3099842938	237019319	237343504	236129441	0.994885	1214063	0.00511521	76098	0.000320624	0.700452	76226	0.000321163	0.918217	387890	0.0016343	0	0	0.0073913	56
NZ74	AGCCAGAG	AGCCAGAG	0	0	0	0	0	0	5061470	1	5061470	0	0	2526954	0.499253	2534516	0.500747	5531	0.00109277	0	0	0	0	0	0	0	0	0	0	0	3099634814	237019319	274398385	272908259	0.994569	1490126	0.00543052	100520	0.000366329	0.710356	95129	0.000346682	0.918616	452584	0.00164937	0	0	0.0077929	56
NZ74	AGCCATCA	AGCCATCA	0	0	0	0	0	0	4154138	1	4154138	0	0	2078645	0.500379	2075493	0.499621	1593	0.000383473	0	0	0	0	0	0	0	0	0	0	0	3099603617	237019319	227649232	226390781	0.994472	1258451	0.00552803	80751	0.000354717	0.704288	72366	0.000317884	0.907443	223130	0.000980148	0	0	0.00718078	56
NZ74	AGCGTATC	AGCGTATC	0	0	0	0	0	0	4081572	1	4081572	0	0	2037329	0.499153	2044243	0.500847	893	0.000218788	0	0	0	0	0	0	0	0	0	0	0	3099553205	237019319	224168127	222967242	0.994643	1200885	0.00535707	87416	0.000389957	0.727945	78097	0.000348386	0.916809	183690	0.00081943	0	0	0.00691485	56
NZ74	AGCGTCGA	AGCGTCGA	0	0	0	0	0	0	2263781	1	2263781	0	0	1130525	0.499397	1133256	0.500603	1401	0.000618876	0	0	0	0	0	0	0	0	0	0	0	3099607385	237019319	123670630	123020375	0.994742	650255	0.00525796	39323	0.000317966	0.689393	39611	0.000320294	0.913888	139653	0.00112923	0	0	0.00702545	56
NZ74	AGCGTGAT	AGCGTGAT	0	0	0	0	0	0	3500737	1	3500737	0	0	1747900	0.499295	1752837	0.500705	1250	0.000357068	0	0	0	0	0	0	0	0	0	0	0	3099227714	237019319	191898815	190888762	0.994737	1010053	0.00526347	71175	0.000370899	0.719171	66356	0.000345786	0.914898	179745	0.000936666	0	0	0.00691682	56
NZ74	AGCGTTCG	AGCGTTCG	0	0	0	0	0	0	1803985	1	1803985	0	0	901672	0.499822	902313	0.500178	256	0.000141908	0	0	0	0	0	0	0	0	0	0	0	3099224444	237019319	99130090	98614583	0.9948	515507	0.00520031	35677	0.000359901	0.71839	32496	0.000327812	0.918175	82882	0.000836093	0	0	0.00672411	56
NZ74	ATGTGCGC	ATGTGCGC	0	0	0	0	0	0	29189	1	29189	0	0	14578	0.499435	14611	0.500565	40	0.00137038	0	0	0	0	0	0	0	0	0	0	0	3037785823	200630282	1576930	1568893	0.994903	8037	0.00509661	515	0.000326584	0.733981	527	0.000334194	0.922201	3111	0.00197282	0	0	0.00773021	56
NZ74	ATGTGGAG	ATGTGGAG	0	0	0	0	0	0	2979241	1	2979241	0	0	1489885	0.500089	1489356	0.499911	2581	0.000866328	0	0	0	0	0	0	0	0	0	0	0	3099900747	237019319	162223230	161408504	0.994978	814726	0.00502225	56970	0.000351183	0.706231	53438	0.00032941	0.91798	220531	0.00135943	0	0	0.00706227	56
NZ74	ATGTGTCA	ATGTGTCA	0	0	0	0	0	0	1331450	1	1331450	0	0	665614	0.499917	665836	0.500083	817	0.000613617	0	0	0	0	0	0	0	0	0	0	0	3099130167	237019319	72708812	72331427	0.99481	377385	0.00519036	30073	0.000413609	0.744887	28648	0.00039401	0.927674	87299	0.00120067	0	0	0.00719865	56
NZ74	ATTCGATC	ATTCGATC	0	0	0	0	0	0	4951772	1	4951772	0	0	2473665	0.499551	2478107	0.500449	4682	0.00094552	0	0	0	0	0	0	0	0	0	0	0	3099614815	237019319	269049378	267616311	0.994674	1433067	0.00532641	97976	0.000364156	0.713052	90824	0.000337574	0.919118	400741	0.00148947	0	0	0.00751761	56
NZ74	ATTCGCGA	ATTCGCGA	0	0	0	0	0	0	4716230	1	4716230	0	0	2359135	0.500216	2357095	0.499784	4375	0.000927648	0	0	0	0	0	0	0	0	0	0	0	3099953218	237019319	256528986	255134850	0.994565	1394136	0.00543461	90460	0.000352631	0.706987	83982	0.000327378	0.915541	374187	0.00145865	0	0	0.00757328	56
NZ74	ATTCGGAT	ATTCGGAT	0	0	0	0	0	0	4876907	1	4876907	0	0	2437760	0.499858	2439147	0.500142	5172	0.00106051	0	0	0	0	0	0	0	0	0	0	0	3099714453	237019319	264567788	263156065	0.994664	1411723	0.00533596	94468	0.000357065	0.715914	91024	0.000344048	0.920329	425306	0.00160755	0	0	0.00764462	56
NZ74	ATTCGTCG	ATTCGTCG	0	0	0	0	0	0	2518405	1	2518405	0	0	1257729	0.499415	1260676	0.500585	2214	0.000879128	0	0	0	0	0	0	0	0	0	0	0	3099675017	237019419	136927393	136226876	0.994884	700517	0.00511597	43891	0.000320542	0.693627	42120	0.000307608	0.912678	201039	0.00146822	0	0	0.00721234	56
NZ74	CACTGATC	CACTGATC	0	0	0	0	0	0	874515	1	874515	0	0	437109	0.49983	437406	0.50017	49	5.60311e-05	0	0	0	0	0	0	0	0	0	0	0	3099952370	237019319	48129234	47890821	0.995046	238413	0.0049536	15557	0.000323234	0.701099	15212	0.000316066	0.917697	33628	0.000698702	0	0	0.0062916	56
NZ74	CACTGCGA	CACTGCGA	0	0	0	0	0	0	1077824	1	1077824	0	0	538883	0.499973	538941	0.500027	867	0.000804398	0	0	0	0	0	0	0	0	0	0	0	3099146595	237019319	58667914	58358110	0.994719	309804	0.00528064	20629	0.000351623	0.70779	19922	0.000339572	0.912609	81776	0.00139388	0	0	0.00736571	56
NZ74	CAGTCATC	CAGTCATC	0	0	0	0	0	0	1979741	1	1979741	0	0	989699	0.499913	990042	0.500087	335	0.000169214	0	0	0	0	0	0	0	0	0	0	0	3100065201	237019319	108890444	108369010	0.995211	521434	0.00478861	33155	0.00030448	0.684361	33142	0.000304361	0.916571	72562	0.000666376	0	0	0.00606383	56
NZ74	CAGTCCGA	CAGTCCGA	0	0	0	0	0	0	1465233	1	1465233	0	0	732938	0.500219	732295	0.499781	905	0.000617649	0	0	0	0	0	0	0	0	0	0	0	3099336496	237019319	79955675	79524464	0.994607	431211	0.00539313	29581	0.000369967	0.716575	27777	0.000347405	0.92501	100175	0.00125288	0	0	0.00736338	56
NZ74	CAGTCGAT	CAGTCGAT	0	0	0	0	0	0	1899065	1	1899065	0	0	949321	0.499889	949744	0.500111	869	0.000457594	0	0	0	0	0	0	0	0	0	0	0	3099173851	237019319	103866003	103305578	0.994604	560425	0.00539565	36899	0.000355256	0.712242	35242	0.000339303	0.912746	114108	0.00109861	0	0	0.00718882	56
NZ74	CAGTCTCG	CAGTCTCG	0	0	0	0	0	0	1383891	1	1383891	0	0	693148	0.500869	690743	0.499131	537	0.000388036	0	0	0	0	0	0	0	0	0	0	0	3099173851	237019319	75798979	75377992	0.994446	420987	0.00555399	28166	0.000371588	0.718774	25996	0.00034296	0.91391	79236	0.00104534	0	0	0.00731388	56
NZ74	CATCAATC	CATCAATC	0	0	0	0	0	0	2065084	1	2065084	0	0	1034892	0.501138	1030192	0.498862	111	5.37508e-05	0	0	0	0	0	0	0	0	0	0	0	3098985250	237019319	113777049	113156466	0.994546	620583	0.00545438	42882	0.000376895	0.738258	39959	0.000351204	0.913361	70359	0.000618394	0	0	0.00680087	56
NZ74	CATCACGC	CATCACGC	0	0	0	0	0	0	4120494	1	4120494	0	0	2058053	0.499468	2062441	0.500532	5295	0.00128504	0	0	0	0	0	0	0	0	0	0	0	3099132566	237019319	222901010	221719624	0.9947	1181386	0.00530005	74460	0.00033405	0.70885	69864	0.000313431	0.913045	406683	0.0018245	0	0	0.00777203	56
NZ74	CATCAGAA	CATCAGAA	0	0	0	0	0	0	1524027	1	1524027	0	0	761532	0.499684	762495	0.500316	2043	0.00134053	0	0	0	0	0	0	0	0	0	0	0	3099449706	237019419	82273580	81864382	0.995026	409198	0.00497363	27606	0.000335539	0.715859	27013	0.000328331	0.918114	165036	0.00200594	0	0	0.00764344	56
NZ74	CATCATCC	CATCATCC	0	0	0	0	0	0	1143610	1	1143610	0	0	567778	0.496479	575832	0.503521	135	0.000118047	0	0	0	0	0	0	0	0	0	0	0	3098543124	237019319	62945060	62599556	0.994511	345504	0.00548898	24567	0.000390293	0.727317	22247	0.000353435	0.935632	42630	0.000677257	0	0	0.00690996	56
NZ74	CGGATATC	CGGATATC	0	0	0	0	0	0	537672	1	537672	0	0	268838	0.500004	268834	0.499996	443	0.000823922	0	0	0	0	0	0	0	0	0	0	0	3098967856	237019419	29285804	29139225	0.994995	146579	0.00500512	9272	0.000316604	0.697584	9320	0.000318243	0.920708	40238	0.00137398	0	0	0.00701394	56
NZ74	CGGATCGA	CGGATCGA	0	0	0	0	0	0	6456360	1	6456360	0	0	3230903	0.500422	3225457	0.499578	2541	0.000393565	0	0	0	0	0	0	0	0	0	0	0	3099648436	237019319	353901772	351918797	0.994397	1982975	0.00560318	145733	0.000411789	0.721552	130748	0.000369447	0.923441	344250	0.000972728	0	0	0.00735714	56
NZ74	CGGATGAT	CGGATGAT	0	0	0	0	0	0	276597	1	276597	0	0	137966	0.498798	138631	0.501202	53	0.000191615	0	0	0	0	0	0	0	0	0	0	0	3099130134	237019319	15192509	15114150	0.994842	78359	0.00515774	5140	0.000338325	0.71284	4944	0.000325424	0.918689	13124	0.000863847	0	0	0.00668533	56
NZ74	CGGATTCG	CGGATTCG	0	0	0	0	0	0	899346	1	899346	0	0	456337	0.50741	443009	0.49259	145	0.000161228	0	0	0	0	0	0	0	0	0	0	0	3097164638	237019319	49236729	48965830	0.994498	270899	0.00550197	20713	0.000420682	0.718824	18879	0.000383433	0.927803	51588	0.00104775	0	0	0.00735384	56
NZ74	CGTGTCGC	CGTGTCGC	0	0	0	0	0	0	2586045	1	2586045	0	0	1293423	0.500155	1292622	0.499845	3772	0.0014586	0	0	0	0	0	0	0	0	0	0	0	3099840442	237019319	139667442	138982732	0.995098	684710	0.00490243	41537	0.000297399	0.676674	42476	0.000304122	0.915246	265574	0.00190147	0	0	0.00740543	56
NZ74	CGTGTGAG	CGTGTGAG	0	0	0	0	0	0	2750323	1	2750323	0	0	1375359	0.500072	1374964	0.499928	3519	0.00127949	0	0	0	0	0	0	0	0	0	0	0	3099638473	237019419	148715930	147951974	0.994863	763956	0.00513702	53234	0.000357958	0.717925	51868	0.000348772	0.919179	272896	0.00183502	0	0	0.00767876	56
NZ74	CGTGTTCA	CGTGTTCA	0	0	0	0	0	0	2463949	1	2463949	0	0	1231964	0.499996	1231985	0.500004	3555	0.00144281	0	0	0	0	0	0	0	0	0	0	0	3099640016	237019319	133035649	132324565	0.994655	711084	0.00534506	44745	0.000336338	0.704347	41344	0.000310774	0.910918	261175	0.0019632	0	0	0.00795537	56
NZ74	CTAACCGC	CTAACCGC	0	0	0	0	0	0	4662020	1	4662020	0	0	2329421	0.499659	2332599	0.500341	5277	0.00113191	0	0	0	0	0	0	0	0	0	0	0	3099555270	237019319	252658611	251283144	0.994556	1375467	0.00544397	89311	0.000353485	0.698335	78286	0.000309849	0.911862	427007	0.00169006	0	0	0.00779736	56
NZ74	CTAACGAG	CTAACGAG	0	0	0	0	0	0	4211328	1	4211328	0	0	2105435	0.499946	2105893	0.500054	5508	0.0013079	0	0	0	0	0	0	0	0	0	0	0	3100219499	237019319	227698076	226556721	0.994987	1141355	0.00501258	79858	0.000350719	0.712089	76629	0.000336538	0.917694	411951	0.0018092	0	0	0.00750904	56
NZ74	CTAACTCA	CTAACTCA	0	0	0	0	0	0	4888845	1	4888845	0	0	2441009	0.499302	2447836	0.500698	4929	0.00100821	0	0	0	0	0	0	0	0	0	0	0	3099838222	237019319	265550009	264065650	0.99441	1484359	0.00558975	94243	0.000354897	0.704445	83849	0.000315756	0.911639	408965	0.00154007	0	0	0.00780047	56
NZ74	CTATGATC	CTATGATC	0	0	0	0	0	0	4060534	1	4060534	0	0	2030109	0.499961	2030425	0.500039	3766	0.000927464	0	0	0	0	0	0	0	0	0	0	0	3099985717	237019419	220816890	219676196	0.994834	1140694	0.00516579	75607	0.000342397	0.709537	70745	0.000320379	0.915202	314892	0.00142603	0	0	0.0072546	56
NZ74	CTATGCGA	CTATGCGA	0	0	0	0	0	0	3913538	1	3913538	0	0	1955506	0.499677	1958032	0.500323	3845	0.000982487	0	0	0	0	0	0	0	0	0	0	0	3099787059	237019419	212722574	211606041	0.994751	1116533	0.00524878	71836	0.000337698	0.704688	70665	0.000332193	0.916465	309714	0.00145595	0	0	0.00737462	56
NZ74	CTATGGAT	CTATGGAT	0	0	0	0	0	0	4648808	1	4648808	0	0	2327208	0.500603	2321600	0.499397	1479	0.000318146	0	0	0	0	0	0	0	0	0	0	0	3099889758	237019319	254974110	253556344	0.99444	1417766	0.00556043	89250	0.000350036	0.702196	81289	0.000318813	0.907011	234457	0.000919533	0	0	0.00714881	56
NZ74	CTATGTCG	CTATGTCG	0	0	0	0	0	0	5490718	1	5490718	0	0	2747377	0.500368	2743341	0.499632	3127	0.000569507	0	0	0	0	0	0	0	0	0	0	0	3100156620	237019319	300072613	298401042	0.994429	1671571	0.00557056	116090	0.000386873	0.709165	104066	0.000346803	0.91983	346704	0.0011554	0	0	0.00745963	56
NZ74	GAATCATC	GAATCATC	0	0	0	0	0	0	3959151	1	3959151	0	0	1975674	0.499015	1983477	0.500985	4530	0.00114418	0	0	0	0	0	0	0	0	0	0	0	3100102077	237019319	214441072	213312869	0.994739	1128203	0.00526113	77929	0.000363405	0.714317	72294	0.000337128	0.920408	366397	0.00170861	0	0	0.00767028	56
NZ74	GAATCCGA	GAATCCGA	0	0	0	0	0	0	4758440	1	4758440	0	0	2377001	0.499534	2381439	0.500466	565	0.000118736	0	0	0	0	0	0	0	0	0	0	0	3099833019	237019319	261844339	260369171	0.994366	1475168	0.00563376	104222	0.00039803	0.720433	93560	0.000357312	0.914034	185392	0.000708024	0	0	0.00709712	56
NZ74	GAATCGAT	GAATCGAT	0	0	0	0	0	0	2958005	1	2958005	0	0	1476156	0.499038	1481849	0.500962	3207	0.00108418	0	0	0	0	0	0	0	0	0	0	0	3099572002	237019319	160339175	159500260	0.994768	838915	0.00523213	56248	0.000350806	0.716648	53771	0.000335358	0.925927	268043	0.00167172	0	0	0.00759002	56
NZ74	GAATCTCG	GAATCTCG	0	0	0	0	0	0	4480343	1	4480343	0	0	2240458	0.500064	2239885	0.499936	5608	0.00125169	0	0	0	0	0	0	0	0	0	0	0	3099959514	237019319	242603254	241350826	0.994838	1252428	0.00516245	73597	0.000303364	0.687773	74070	0.000305313	0.914054	414364	0.00170799	0	0	0.00747912	56
NZ74	GACACCGC	GACACCGC	0	0	0	0	0	0	4495298	1	4495298	0	0	2246826	0.499817	2248472	0.500183	5374	0.00119547	0	0	0	0	0	0	0	0	0	0	0	3099644730	237019319	243529410	242225678	0.994647	1303732	0.00535349	84126	0.000345445	0.707427	75730	0.000310969	0.910577	423172	0.00173766	0	0	0.00774757	56
NZ74	GACACGAG	GACACGAG	0	0	0	0	0	0	4169221	1	4169221	0	0	2085386	0.500186	2083835	0.499814	5585	0.00133958	0	0	0	0	0	0	0	0	0	0	0	3100057068	237019319	225288461	224097337	0.994713	1191124	0.00528711	76117	0.000337865	0.701591	74361	0.00033007	0.916166	418733	0.00185865	0	0	0.00781369	56
NZ74	GACACTCA	GACACTCA	0	0	0	0	0	0	12426	1	12426	0	0	5836	0.46966	6590	0.53034	10	0.000804764	0	0	0	0	0	0	0	0	0	0	0	3036880353	200630282	672014	668371	0.994579	3643	0.00542102	196	0.000291661	0.770408	273	0.000406242	0.934066	1249	0.00185859	0	0	0.00797751	56
NZ74	GCTCAATC	GCTCAATC	0	0	0	0	0	0	154085	1	154085	0	0	76871	0.498887	77214	0.501113	76	0.000493234	0	0	0	0	0	0	0	0	0	0	0	3098673114	237019319	8409091	8361555	0.994347	47536	0.00565293	2742	0.000326076	0.69329	2559	0.000304314	0.912466	11189	0.00133058	0	0	0.0076139	56
NZ74	GCTCACGA	GCTCACGA	0	0	0	0	0	0	3455649	1	3455649	0	0	1724096	0.498921	1731553	0.501079	1745	0.00050497	0	0	0	0	0	0	0	0	0	0	0	3099278016	237019319	188998268	188003297	0.994736	994971	0.00526445	67682	0.000358109	0.720753	63437	0.000335649	0.923467	202336	0.00107057	0	0	0.00702877	56
NZ74	GCTCAGAT	GCTCAGAT	0	0	0	0	0	0	254250	1	254250	0	0	126981	0.499434	127269	0.500566	110	0.000432645	0	0	0	0	0	0	0	0	0	0	0	3099027731	237019319	13911135	13834112	0.994463	77023	0.00553679	4798	0.000344904	0.705502	4443	0.000319384	0.907495	16111	0.00115814	0	0	0.00735921	56
NZ74	GCTCATCG	GCTCATCG	0	0	0	0	0	0	4377031	1	4377031	0	0	2189466	0.500217	2187565	0.499783	1020	0.000233035	0	0	0	0	0	0	0	0	0	0	0	3099117915	237019319	240405124	239089046	0.994526	1316078	0.00547442	95314	0.000396472	0.728938	84889	0.000353108	0.918069	205227	0.000853671	0	0	0.00707767	56
NZ74	GCTTGCGC	GCTTGCGC	0	0	0	0	0	0	2455253	1	2455253	0	0	1227254	0.499848	1227999	0.500152	3120	0.00127074	0	0	0	0	0	0	0	0	0	0	0	3099651721	237019319	132810972	132114490	0.994756	696482	0.00524416	47158	0.000355076	0.710357	45075	0.000339392	0.920865	239729	0.00180504	0	0	0.00774367	56
NZ74	GCTTGGAG	GCTTGGAG	0	0	0	0	0	0	3308931	1	3308931	0	0	1652121	0.499291	1656810	0.500709	3633	0.00109794	0	0	0	0	0	0	0	0	0	0	0	3099491577	237019319	179402758	178443748	0.994654	959010	0.00534557	66537	0.000370881	0.711845	62316	0.000347353	0.918977	299593	0.00166995	0	0	0.00773375	56
NZ74	GCTTGTCA	GCTTGTCA	0	0	0	0	0	0	2282266	1	2282266	0	0	1140213	0.499597	1142053	0.500403	2429	0.00106429	0	0	0	0	0	0	0	0	0	0	0	3099531697	237019319	123751091	123116400	0.994871	634691	0.00512877	43505	0.000351552	0.719389	41796	0.000337742	0.919394	202726	0.00163818	0	0	0.00745624	56
NZ74	GTACGATC	GTACGATC	0	0	0	0	0	0	405835	1	405835	0	0	203138	0.500543	202697	0.499457	33	8.13138e-05	0	0	0	0	0	0	0	0	0	0	0	3099119727	237019419	22264204	22146728	0.994724	117476	0.00527645	7934	0.000356357	0.714268	7140	0.000320694	0.921429	23267	0.00104504	0	0	0.00699854	56
NZ74	GTACGCGA	GTACGCGA	0	0	0	0	0	0	926471	1	926471	0	0	461811	0.498462	464660	0.501538	55	5.93651e-05	0	0	0	0	0	0	0	0	0	0	0	3099702063	237019319	50957347	50699296	0.994936	258051	0.00506406	17325	0.00033999	0.708514	16813	0.000329943	0.920419	39717	0.000779417	0	0	0.00651341	56
NZ74	GTACGGAT	GTACGGAT	0	0	0	0	0	0	1173048	1	1173048	0	0	587340	0.500696	585708	0.499304	482	0.000410895	0	0	0	0	0	0	0	0	0	0	0	3099031632	237019319	64202283	63849224	0.994501	353059	0.00549917	22415	0.000349131	0.695873	21066	0.000328119	0.917497	70305	0.00109505	0	0	0.00727147	56
NZ74	GTACGTCG	GTACGTCG	0	0	0	0	0	0	1226907	1	1226907	0	0	612170	0.498954	614737	0.501046	626	0.000510226	0	0	0	0	0	0	0	0	0	0	0	3099508558	237019319	67078892	66730113	0.9948	348779	0.00519953	24932	0.000371682	0.712899	22872	0.000340972	0.921214	75671	0.00112809	0	0	0.00704028	56
NZ74	GTCGTATC	GTCGTATC	0	0	0	0	0	0	1199960	1	1199960	0	0	599615	0.499696	600345	0.500304	1874	0.00156172	0	0	0	0	0	0	0	0	0	0	0	3099759943	237019319	64637572	64302391	0.994814	335181	0.00518554	20672	0.000319814	0.703657	19718	0.000305055	0.911249	138154	0.00213736	0	0	0.00794778	56
NZ74	GTCGTCGC	GTCGTCGC	0	0	0	0	0	0	2295170	1	2295170	0	0	1148433	0.500369	1146737	0.499631	2419	0.00105395	0	0	0	0	0	0	0	0	0	0	0	3099312962	237019319	124445718	123781932	0.994666	663786	0.00533394	46880	0.00037671	0.72404	44455	0.000357224	0.922123	210077	0.0016881	0	0	0.00775598	56
NZ74	GTCGTGAA	GTCGTGAA	0	0	0	0	0	0	1409732	1	1409732	0	0	707551	0.501905	702181	0.498095	308	0.000218481	0	0	0	0	0	0	0	0	0	0	0	3099329021	237019319	77428479	76959909	0.993948	468570	0.00605165	30935	0.00039953	0.739906	31248	0.000403572	0.932284	65242	0.00084261	0	0	0.00769736	56
NZ74	GTCGTTCC	GTCGTTCC	0	0	0	0	0	0	1788575	1	1788575	0	0	894783	0.500277	893792	0.499723	1989	0.00111206	0	0	0	0	0	0	0	0	0	0	0	3099349640	237019319	96874609	96381413	0.994909	493196	0.00509108	33500	0.000345808	0.725403	31147	0.000321519	0.920699	171581	0.00177117	0	0	0.00752957	56
NZ74	GTGCAATC	GTGCAATC	0	0	0	0	0	0	1552780	1	1552780	0	0	775099	0.499169	777681	0.500831	624	0.00040186	0	0	0	0	0	0	0	0	0	0	0	3099266010	237019319	85009671	84540591	0.994482	469080	0.00551796	30534	0.000359183	0.700367	27251	0.000320564	0.918535	91247	0.00107337	0	0	0.00727108	56
NZ74	GTGCACGA	GTGCACGA	0	0	0	0	0	0	1526928	1	1526928	0	0	764575	0.500728	762353	0.499272	398	0.000260654	0	0	0	0	0	0	0	0	0	0	0	3098899250	237019319	83815564	83355545	0.994512	460019	0.00548847	31384	0.000374441	0.71734	29171	0.000348038	0.913887	75881	0.000905333	0	0	0.00711628	56
NZ74	TAGACATC	TAGACATC	0	0	0	0	0	0	3148982	1	3148982	0	0	1574754	0.500084	1574228	0.499916	2565	0.000814549	0	0	0	0	0	0	0	0	0	0	0	3099803237	237019319	171457846	170581586	0.994889	876260	0.00511064	56719	0.000330804	0.709462	53892	0.000314316	0.916221	231540	0.00135042	0	0	0.00710618	56
NZ74	TAGACCGA	TAGACCGA	0	0	0	0	0	0	2538085	1	2538085	0	0	1272043	0.501182	1266042	0.498818	390	0.000153659	0	0	0	0	0	0	0	0	0	0	0	3099143727	237019419	139509146	138779365	0.994769	729781	0.00523106	50303	0.000360571	0.720215	47637	0.000341461	0.910469	108684	0.000779046	0	0	0.00671214	56
NZ74	TAGACGAT	TAGACGAT	0	0	0	0	0	0	4080720	1	4080720	0	0	2045079	0.501156	2035641	0.498844	1647	0.000403605	0	0	0	0	0	0	0	0	0	0	0	3099440799	237019319	223458346	222257563	0.994626	1200783	0.00537363	83944	0.000375658	0.716216	76566	0.000342641	0.916987	223334	0.000999444	0	0	0.00709138	56
NZ74	TAGACTCG	TAGACTCG	0	0	0	0	0	0	1675469	1	1675469	0	0	836148	0.499053	839321	0.500947	594	0.000354528	0	0	0	0	0	0	0	0	0	0	0	3099460768	237019319	91792972	91296703	0.994594	496269	0.00540639	32628	0.000355452	0.71077	31193	0.000339819	0.921008	92942	0.00101252	0	0	0.00711418	56
NZ74	TAGGTCGC	TAGGTCGC	0	0	0	0	0	0	1188603	1	1188603	0	0	594807	0.500425	593796	0.499575	1787	0.00150345	0	0	0	0	0	0	0	0	0	0	0	3099099127	237019319	64035440	63710348	0.994923	325092	0.00507675	21717	0.00033914	0.709536	21961	0.000342951	0.925094	134926	0.00210705	0	0	0.00786589	56
NZ74	TAGGTGAG	TAGGTGAG	0	0	0	0	0	0	429935	1	429935	0	0	214239	0.498306	215696	0.501694	354	0.00082338	0	0	0	0	0	0	0	0	0	0	0	3098802086	237019319	23412631	23290214	0.994771	122417	0.00522867	8758	0.000374072	0.712606	8032	0.000343063	0.925299	33660	0.00143769	0	0	0.00738349	56
NZ74	TAGGTTCA	TAGGTTCA	0	0	0	0	0	0	17613	1	17613	0	0	9727	0.552263	7886	0.447737	7	0.000397434	0	0	0	0	0	0	0	0	0	0	0	3096134994	237019319	954215	947261	0.992712	6954	0.00728767	331	0.000346882	0.667674	433	0.000453776	0.618938	1935	0.00202784	0	0	0.0101162	56
NZ74	TCACACGC	TCACACGC	0	0	0	0	0	0	3172527	1	3172527	0	0	1587324	0.500334	1585203	0.499666	3322	0.00104711	0	0	0	0	0	0	0	0	0	0	0	3099867969	237019319	172119563	171252114	0.99496	867449	0.0050398	58717	0.000341141	0.719638	56976	0.000331026	0.912472	279778	0.00162549	0	0	0.00733746	56
NZ74	TCACAGAG	TCACAGAG	0	0	0	0	0	0	4198397	1	4198397	0	0	2097202	0.499524	2101195	0.500476	4609	0.0010978	0	0	0	0	0	0	0	0	0	0	0	3099392872	237019319	227724658	226474179	0.994509	1250479	0.00549119	84668	0.0003718	0.7123	77834	0.00034179	0.915076	374294	0.00164363	0	0	0.0078484	56
NZ74	TCACATCA	TCACATCA	0	0	0	0	0	0	4600718	1	4600718	0	0	2298734	0.499647	2301984	0.500353	5000	0.00108679	0	0	0	0	0	0	0	0	0	0	0	3099705650	237019319	249633698	248308981	0.994693	1324717	0.00530664	87554	0.00035073	0.715033	81401	0.000326082	0.921659	405101	0.00162278	0	0	0.00760624	56
NZ74	TCCGAATC	TCCGAATC	0	0	0	0	0	0	6283884	1	6283884	0	0	3138411	0.499438	3145473	0.500562	6096	0.000970101	0	0	0	0	0	0	0	0	0	0	0	3099468775	237019319	341473792	339581100	0.994457	1892692	0.00554272	128690	0.000376866	0.712891	111857	0.000327571	0.910788	510233	0.00149421	0	0	0.00774136	56
NZ74	TCCGACGA	TCCGACGA	0	0	0	0	0	0	5529285	1	5529285	0	0	2763854	0.499857	2765431	0.500143	6089	0.00110123	0	0	0	0	0	0	0	0	0	0	0	3099815727	237019319	300067165	298441181	0.994581	1625984	0.00541873	108169	0.000360483	0.702623	99973	0.000333169	0.916327	482210	0.00160701	0	0	0.00771939	56
NZ74	TCCGAGAT	TCCGAGAT	0	0	0	0	0	0	7031185	1	7031185	0	0	3515873	0.50004	3515312	0.49996	6812	0.000968827	0	0	0	0	0	0	0	0	0	0	0	3100192259	237019319	381773641	379766349	0.994742	2007292	0.00525781	141282	0.000370067	0.724947	135911	0.000355999	0.918851	565670	0.00148169	0	0	0.00746556	56
NZ74	TCCGATCG	TCCGATCG	0	0	0	0	0	0	3648653	1	3648653	0	0	1829260	0.501352	1819393	0.498648	3352	0.000918695	0	0	0	0	0	0	0	0	0	0	0	3099907780	237019419	198349385	197324618	0.994834	1024767	0.00516647	69238	0.000349071	0.715171	65306	0.000329247	0.918553	292046	0.00147238	0	0	0.00731717	56
NZ74	TGATGATC	TGATGATC	0	0	0	0	0	0	1800923	1	1800923	0	0	900948	0.50027	899975	0.49973	2261	0.00125547	0	0	0	0	0	0	0	0	0	0	0	3099839772	237019419	97429285	96916064	0.994732	513221	0.00526763	33480	0.000343634	0.703017	30286	0.000310851	0.915472	179943	0.00184691	0	0	0.00776902	56
NZ74	TGATGCGC	TGATGCGC	0	0	0	0	0	0	3161603	1	3161603	0	0	1581537	0.500233	1580066	0.499767	3820	0.00120825	0	0	0	0	0	0	0	0	0	0	0	3099692131	237019319	171352211	170454331	0.99476	897880	0.00523997	58844	0.00034341	0.707685	54959	0.000320737	0.916156	293642	0.00171367	0	0	0.00761779	56
NZ74	TGATGGAA	TGATGGAA	0	0	0	0	0	0	839753	1	839753	0	0	419605	0.499677	420148	0.500323	1353	0.00161119	0	0	0	0	0	0	0	0	0	0	0	3099213237	237019319	45202836	44971185	0.994875	231651	0.0051247	14727	0.000325798	0.704013	14555	0.000321993	0.915562	99351	0.00219789	0	0	0.00797038	56
NZ74	TGATGTCC	TGATGTCC	0	0	0	0	0	0	1018105	1	1018105	0	0	516586	0.5074	501519	0.4926	72	7.07196e-05	0	0	0	0	0	0	0	0	0	0	0	3097150621	237019319	56121274	55820858	0.994647	300416	0.00535298	22281	0.000397015	0.741214	20771	0.000370109	0.919696	30214	0.00053837	0	0	0.00665847	56
NZ74	TGCATATC	TGCATATC	0	0	0	0	0	0	6059818	1	6059818	0	0	3032449	0.500419	3027369	0.499581	2098	0.000346215	0	0	0	0	0	0	0	0	0	0	0	3099989114	237019319	332292196	330510482	0.994638	1781714	0.00536189	131599	0.000396034	0.719322	117387	0.000353264	0.921857	311881	0.000938575	0	0	0.00704976	56
NZ74	TGCATCGA	TGCATCGA	0	0	0	0	0	0	1525344	1	1525344	0	0	763263	0.500387	762081	0.499613	862	0.000565118	0	0	0	0	0	0	0	0	0	0	0	3099560664	237019319	83340159	82897335	0.994687	442824	0.00531345	29705	0.000356431	0.706952	27805	0.000333633	0.919223	98211	0.00117844	0	0	0.00718195	56
NZ74	TGCATGAT	TGCATGAT	0	0	0	0	0	0	1665852	1	1665852	0	0	831672	0.499247	834180	0.500753	292	0.000175286	0	0	0	0	0	0	0	0	0	0	0	3099630642	237019319	91419375	90941719	0.994775	477656	0.00522489	32310	0.000353426	0.722222	30004	0.000328202	0.919411	96479	0.00105535	0	0	0.00696186	56
NZ74	TGCATTCG	TGCATTCG	0	0	0	0	0	0	1017872	1	1017872	0	0	509009	0.500072	508863	0.499928	108	0.000106104	0	0	0	0	0	0	0	0	0	0	0	3099303644	237019419	55921720	55637943	0.994925	283777	0.00507454	18814	0.000336435	0.702562	17725	0.000316961	0.910522	49243	0.00088057	0	0	0.00660851	56
NZ74	TGTACATC	TGTACATC	0	0	0	0	0	0	1484019	1	1484019	0	0	742678	0.50045	741341	0.49955	718	0.000483821	0	0	0	0	0	0	0	0	0	0	0	3099114253	237019319	81124492	80704128	0.994818	420364	0.00518172	29068	0.000358313	0.714119	25845	0.000318584	0.916541	95177	0.00117322	0	0	0.00703183	56
NZ74	TGTACCGA	TGTACCGA	0	0	0	0	0	0	2333675	1	2333675	0	0	1165644	0.499489	1168031	0.500511	1599	0.000685185	0	0	0	0	0	0	0	0	0	0	0	3099617924	237019319	127348018	126656960	0.994573	691058	0.00542653	44006	0.000345557	0.705017	40706	0.000319644	0.912617	160772	0.00126246	0	0	0.00735419	56
[truncated: 9 more columns]

## Sheet: BICRO229_NEB
Supplementary Table 1. Summary of sequencing runs.
Sample	Library	#QCFail	QCFailFraction	#DuplicateMarked	DuplicateFraction	#Unmapped	UnmappedFraction	#Mapped	MappedFraction	#MappedRead1	#MappedRead2	RatioMapped2vsMapped1	#MappedForward	MappedForwardFraction	#MappedReverse	MappedReverseFraction	#SecondaryAlignments	SecondaryAlignmentFraction	#SupplementaryAlignments	SupplementaryAlignmentFraction	#SplicedAlignments	SplicedAlignmentFraction	#Pairs	#MappedPairs	MappedPairsFraction	#MappedSameChr	MappedSameChrFraction	#MappedProperPair	MappedProperFraction	#ReferenceBp	#ReferenceNs	#AlignedBases	#MatchedBases	MatchRate	#MismatchedBases	MismatchRate	#DeletionsCigarD	DeletionRate	HomopolymerContextDel	#InsertionsCigarI	InsertionRate	HomopolymerContextIns	#SoftClippedCigarS	SoftClipRate	#HardClippedCigarH	HardClipRate	ErrorRate	MedianReadLength	DefaultLibraryLayout
MS29_S1	MS29_S1	0	0	1011938	0.0500166	3335077	0.164841	15885028	0.785142	15885028	0	0	7941584	0.499941	7943444	0.500059	6603	0.000415674	0	0	0	0	0	0	0	0	0	0	0	3101804739	237019519	1180009492	1171585222	0.992861	8424270	0.00713915	567549	0.00048097	0.732858	180206	0.000152716	0.781822	819500	0.000694486	0	0	0.00846733	76	0
MS30_S2	MS30_S2	0	0	651083	0.0429818	2026078	0.133753	12470729	0.823265	12470729	0	0	6232930	0.499805	6237799	0.500195	5068	0.000406392	0	0	0	0	0	0	0	0	0	0	0	3101800477	237019519	928163674	921696464	0.993032	6467210	0.00696775	439569	0.00047359	0.742131	142174	0.000153178	0.782154	573401	0.00061778	0	0	0.0082123	76	0
MS31_S3	MS31_S3	0	0	903196	0.052731	1811801	0.105778	14413370	0.841491	14413370	0	0	7205972	0.499951	7207398	0.500049	5287	0.000366812	0	0	0	0	0	0	0	0	0	0	0	3101804739	237019519	1073164524	1065801540	0.993139	7362984	0.006861	504532	0.000470135	0.740304	162637	0.000151549	0.781913	647300	0.000603169	0	0	0.00808586	76	0
MS32_S4	MS32_S4	0	0	840662	0.0500427	1525118	0.0907868	14433116	0.859171	14433116	0	0	7212505	0.499719	7220611	0.500281	5900	0.000408782	0	0	0	0	0	0	0	0	0	0	0	3101759476	237019519	1074325345	1067357276	0.993514	6968069	0.006486	500782	0.000466136	0.741267	160009	0.000148939	0.785425	651678	0.000606593	0	0	0.00770766	76	0
MS35_S5	MS35_S5	0	0	622137	0.0426832	229472	0.0157435	13724070	0.941573	13724070	0	0	6860175	0.499864	6863895	0.500136	47289	0.0034457	0	0	0	0	0	0	0	0	0	0	0	3101804739	237019519	975377819	968620497	0.993072	6757322	0.0069279	406454	0.000416714	0.725713	131805	0.000135132	0.755525	2355595	0.00241506	0	0	0.00989481	76	0
MS36_S6	MS36_S6	0	0	652727	0.0396427	143851	0.00873663	15668691	0.951621	15668691	0	0	7835032	0.500044	7833659	0.499956	54844	0.00350023	0	0	0	0	0	0	0	0	0	0	0	3101804739	237019519	1130940427	1123142374	0.993105	7798053	0.00689519	485739	0.0004295	0.735035	160335	0.000141771	0.766333	2072244	0.00183232	0	0	0.00929878	76	0
MS37_S7	MS37_S7	0	0	409255	0.0353159	163482	0.0141074	11015665	0.950577	11015665	0	0	5507639	0.499982	5508026	0.500018	40874	0.00371053	0	0	0	0	0	0	0	0	0	0	0	3101804739	237019519	786666176	781070471	0.992887	5595705	0.00711319	333107	0.000423441	0.727712	108052	0.000137354	0.755923	1773900	0.00225496	0	0	0.00992894	76	0
MS38_S8	MS38_S8	0	0	445177	0.0347072	164851	0.0128522	12216612	0.952441	12216612	0	0	6107923	0.499969	6108689	0.500031	41669	0.00341085	0	0	0	0	0	0	0	0	0	0	0	3101804739	237019519	879064074	872649259	0.992703	6414815	0.00729732	378263	0.000430302	0.730151	124240	0.000141332	0.760182	1745280	0.00198538	0	0	0.00985434	76	0
[truncated: 8 more columns]

## Sheet: BICRO221
Supplementary Table 1. Summary of sequencing runs.
Sample	Library	#QCFail	QCFailFraction	#DuplicateMarked	DuplicateFraction	#Unmapped	UnmappedFraction	#Mapped	MappedFraction	#MappedRead1	#MappedRead2	RatioMapped2vsMapped1	#MappedForward	MappedForwardFraction	#MappedReverse	MappedReverseFraction	#SecondaryAlignments	SecondaryAlignmentFraction	#SupplementaryAlignments	SupplementaryAlignmentFraction	#SplicedAlignments	SplicedAlignmentFraction	#Pairs	#MappedPairs	MappedPairsFraction	#MappedSameChr	MappedSameChrFraction	#MappedProperPair	MappedProperFraction	#ReferenceBp	#ReferenceNs	#AlignedBases	#MatchedBases	MatchRate	#MismatchedBases	MismatchRate	#DeletionsCigarD	DeletionRate	HomopolymerContextDel	#InsertionsCigarI	InsertionRate	HomopolymerContextIns	#SoftClippedBases	SoftClipRate	#HardClippedBases	HardClipRate	ErrorRate	MedianReadLength	DefaultLibraryLayout
NZ47	NZ47	0	0	937410	0.0491754	607536	0.0318706	17517642	0.918954	17517642	0	0	8758615	0.499988	8759027	0.500012	102477	0.00584993	0	0	0	0	0	0	0	0	0	0	0	3101804739	237019519	1209086982	1198296363	0.991075	10790619	0.0089246	369719	0.000305784	0.712114	130873	0.000108241	0.687285	4668393	0.00386109	0	0	0.0131997	76	0
NZ49	NZ49	0	0	958133	0.0436856	443294	0.0202117	20531064	0.936103	20531064	0	0	10265891	0.500017	10265173	0.499983	66175	0.00322316	0	0	0	0	0	0	0	0	0	0	0	3101804739	237019519	1468657084	1455806679	0.99125	12850405	0.00874977	435823	0.000296749	0.707691	145926	9.93602e-05	0.687787	3665907	0.00249609	0	0	0.011642	76	0
NZ50	NZ50	0	0	1237667	0.0571887	532038	0.0245838	19872093	0.918227	19872093	0	0	9932364	0.499815	9939729	0.500185	89315	0.00449449	0	0	0	0	0	0	0	0	0	0	0	3101804739	237019519	1382553614	1370042621	0.990951	12510993	0.00904919	434301	0.00031413	0.711097	145328	0.000105116	0.699198	4816431	0.00348372	0	0	0.0129522	76	0
NZ56	NZ56	0	0	1256708	0.0821481	400809	0.0262	13640561	0.891652	13640561	0	0	6816697	0.499737	6823864	0.500263	34493	0.00252871	0	0	0	0	0	0	0	0	0	0	0	3101800477	237019519	949534320	940699680	0.990696	8834640	0.00930418	341498	0.000359648	0.708607	107576	0.000113293	0.716526	3294529	0.00346963	0	0	0.0132467	76	0
NZ57	NZ57	0	0	1021142	0.0739244	409349	0.0296343	12382839	0.896441	12382839	0	0	6189124	0.499815	6193715	0.500185	32368	0.00261394	0	0	0	0	0	0	0	0	0	0	0	3101804739	237019519	862182284	853634676	0.990086	8547608	0.00991392	317840	0.000368646	0.717779	101458	0.000117676	0.72701	2949231	0.00342066	0	0	0.0138209	76	0
NZ58	NZ58	0	0	914303	0.0503559	1524194	0.0839461	15718330	0.865698	15718330	0	0	7858279	0.499944	7860051	0.500056	47134	0.00299866	0	0	0	0	0	0	0	0	0	0	0	3101804739	237019519	1098534491	1088788020	0.991128	9746471	0.00887225	350523	0.000319082	0.684069	106229	9.67007e-05	0.676548	3670265	0.00334106	0	0	0.0126291	76	0
[truncated: 8 more columns]

## Sheet: BICRO218
Supplementary Table 1. Summary of sequencing runs.
Seq_library	Sample	Library	#QCFail	QCFailFraction	#DuplicateMarked	DuplicateFraction	#Unmapped	UnmappedFraction	#Mapped	MappedFraction	#MappedRead1	#MappedRead2	RatioMapped2vsMapped1	#MappedForward	MappedForwardFraction	#MappedReverse	MappedReverseFraction	#SecondaryAlignments	SecondaryAlignmentFraction	#SupplementaryAlignments	SupplementaryAlignmentFraction	#SplicedAlignments	SplicedAlignmentFraction	#Pairs	#MappedPairs	MappedPairsFraction	#MappedSameChr	MappedSameChrFraction	#MappedProperPair	MappedProperFraction	#ReferenceBp	#ReferenceNs	#AlignedBases	#MatchedBases	MatchRate	#MismatchedBases	MismatchRate	#DeletionsCigarD	DeletionRate	HomopolymerContextDel	#InsertionsCigarI	InsertionRate	HomopolymerContextIns	#SoftClippedCigarS	SoftClipRate	#HardClippedCigarH	HardClipRate	ErrorRate	MedianReadLength
NZ39	ACGACATC	ACGACATC	0	0	0	0	0	0	348695	1	348695	0	0	174013	0.499041	174682	0.500959	18	5.1621e-05	0	0	0	0	0	0	0	0	0	0	0	3099371656	237019319	19051363	18994032	0.996991	57331	0.00300929	2920	0.00015327	0.646918	6571	0.00034491	0.937452	15951	0.000837263	0	0	0.00434473	56
NZ39	ACGACGAA	ACGACGAA	0	0	0	0	0	0	17998531	1	17998531	0	0	9000537	0.500071	8997994	0.499929	859	4.77261e-05	0	0	0	0	0	0	0	0	0	0	0	3100741102	237019419	983230089	979480954	0.996187	3749135	0.00381308	249669	0.000253927	0.693442	348464	0.000354407	0.929976	971803	0.000988378	0	0	0.00540979	56
NZ39	AGCCACGC	AGCCACGC	0	0	0	0	0	0	213224	1	213224	0	0	106521	0.499573	106703	0.500427	16	7.50385e-05	0	0	0	0	0	0	0	0	0	0	0	3098650204	237019419	11618246	11577985	0.996535	40261	0.00346533	2496	0.000214834	0.669872	3986	0.000343081	0.926493	13407	0.00115396	0	0	0.0051772	56
NZ39	AGCCAGAG	AGCCAGAG	0	0	0	0	0	0	78023	1	78023	0	0	38889	0.49843	39134	0.50157	9	0.000115351	0	0	0	0	0	0	0	0	0	0	0	3098433936	237019319	4239382	4224710	0.996539	14672	0.00346088	872	0.00020569	0.66055	1532	0.000361373	0.938642	5679	0.00133958	0	0	0.00536753	56
NZ39	ATGTGTCA	ATGTGTCA	0	0	0	0	0	0	122452	1	122452	0	0	61611	0.503144	60841	0.496856	4	3.26659e-05	0	0	0	0	0	0	0	0	0	0	0	3098594166	237019319	6684626	6665662	0.997163	18964	0.00283696	1070	0.000160069	0.623364	2497	0.000373544	0.939928	5298	0.000792565	0	0	0.00416313	56
NZ39	ATTCGATC	ATTCGATC	0	0	0	0	0	0	50477	1	50477	0	0	25355	0.502308	25122	0.497692	7	0.000138677	0	0	0	0	0	0	0	0	0	0	0	3038832864	200630282	2733864	2723819	0.996326	10045	0.00367429	663	0.000242514	0.678733	895	0.000327375	0.928492	4575	0.00167346	0	0	0.00591763	56
NZ39	CATCAATC	CATCAATC	0	0	0	0	0	0	168750	1	168750	0	0	84754	0.502246	83996	0.497754	19	0.000112593	0	0	0	0	0	0	0	0	0	0	0	3098633413	237019319	9181699	9148463	0.99638	33236	0.00361981	2045	0.000222726	0.674817	3096	0.000337192	0.923773	11788	0.00128386	0	0	0.00546359	56
NZ39	CATCAGAA	CATCAGAA	0	0	0	0	0	0	666835	1	666835	0	0	333333	0.499873	333502	0.500127	28	4.19894e-05	0	0	0	0	0	0	0	0	0	0	0	3099837824	237019319	36457634	36336694	0.996683	120940	0.00331728	7278	0.000199629	0.668453	13458	0.000369141	0.934909	25900	0.000710414	0	0	0.00459646	56
NZ39	CGGATATC	CGGATATC	0	0	0	0	0	0	78634	1	78634	0	0	39679	0.504604	38955	0.495396	9	0.000114454	0	0	0	0	0	0	0	0	0	0	0	3097732508	237019319	4277753	4262844	0.996515	14909	0.00348524	1015	0.000237274	0.670936	1545	0.000361171	0.933981	4805	0.00112325	0	0	0.00520694	56
NZ39	CGTGTTCA	CGTGTTCA	0	0	0	0	0	0	10281252	1	10281252	0	0	5142252	0.500158	5139000	0.499842	410	3.98784e-05	0	0	0	0	0	0	0	0	0	0	0	3100470687	237019319	562851002	560770157	0.996303	2080845	0.00369697	147348	0.000261789	0.67287	197383	0.000350684	0.929092	436179	0.000774946	0	0	0.00508439	56
NZ39	CTAACCGC	CTAACCGC	0	0	0	0	0	0	155852	1	155852	0	0	77827	0.499365	78025	0.500635	11	7.05798e-05	0	0	0	0	0	0	0	0	0	0	0	3097884003	237019319	8477661	8446031	0.996269	31630	0.00373098	2031	0.000239571	0.675037	2558	0.000301734	0.923769	11643	0.00137337	0	0	0.00564566	56
NZ39	CTAACGAG	CTAACGAG	0	0	0	0	0	0	34008	1	34008	0	0	17065	0.501794	16943	0.498206	6	0.000176429	0	0	0	0	0	0	0	0	0	0	0	3097007477	237019319	1842758	1835750	0.996197	7008	0.003803	454	0.00024637	0.676211	687	0.000372811	0.919942	2954	0.00160303	0	0	0.00602521	56
NZ39	GAATCATC	GAATCATC	0	0	0	0	0	0	33039856	1	33039856	0	0	16519268	0.49998	16520588	0.50002	1521	4.60353e-05	0	0	0	0	0	0	0	0	0	0	0	3100913433	237019419	1806197211	1799295638	0.996179	6901573	0.00382105	452630	0.000250598	0.688246	601307	0.000332913	0.926372	1714876	0.00094944	0	0	0.005354	56
NZ39	GACACTCA	GACACTCA	0	0	0	0	0	0	783664	1	783664	0	0	390736	0.498601	392928	0.501399	28	3.57296e-05	0	0	0	0	0	0	0	0	0	0	0	3098005993	237019319	42841084	42679956	0.996239	161128	0.00376106	10854	0.000253355	0.689331	15532	0.000362549	0.927891	31578	0.000737096	0	0	0.00511406	56
NZ39	GCTTGCGC	GCTTGCGC	0	0	0	0	0	0	8167036	1	8167036	0	0	4082576	0.499885	4084460	0.500115	254	3.11006e-05	0	0	0	0	0	0	0	0	0	0	0	3100198761	237019319	446616014	445018142	0.996422	1597872	0.00357773	114771	0.000256979	0.67057	157916	0.000353583	0.929956	375865	0.000841584	0	0	0.00502988	56
NZ39	GCTTGGAG	GCTTGGAG	0	0	0	0	0	0	52996	1	52996	0	0	26434	0.498792	26562	0.501208	10	0.000188693	0	0	0	0	0	0	0	0	0	0	0	3098187079	237019319	2864519	2853954	0.996312	10565	0.00368823	743	0.00025938	0.666218	964	0.000336531	0.915975	5338	0.00186349	0	0	0.00614763	56
NZ39	GTCGTATC	GTCGTATC	0	0	0	0	0	0	130094	1	130094	0	0	65358	0.502391	64736	0.497609	12	9.2241e-05	0	0	0	0	0	0	0	0	0	0	0	3098079005	237019319	7078123	7052545	0.996386	25578	0.00361367	1751	0.000247382	0.66305	2501	0.000353342	0.923231	9506	0.00134301	0	0	0.00555741	56
NZ39	GTCGTGAA	GTCGTGAA	0	0	0	0	0	0	50609	1	50609	0	0	25272	0.499358	25337	0.500642	1	1.97593e-05	0	0	0	0	0	0	0	0	0	0	0	3098336685	237019319	2751254	2740611	0.996132	10643	0.00386842	657	0.0002388	0.681887	958	0.000348205	0.934238	3792	0.00137828	0	0	0.0058337	56
NZ39	TAGGTCGC	TAGGTCGC	0	0	0	0	0	0	8009729	1	8009729	0	0	4003078	0.499777	4006651	0.500223	320	3.99514e-05	0	0	0	0	0	0	0	0	0	0	0	3100262083	237019319	438131490	436533888	0.996354	1597602	0.0036464	114645	0.000261668	0.680832	162125	0.000370037	0.934316	365289	0.000833743	0	0	0.00511185	56
NZ39	TAGGTGAG	TAGGTGAG	0	0	0	0	0	0	24795703	1	24795703	0	0	12405101	0.500292	12390602	0.499708	1677	6.76327e-05	0	0	0	0	0	0	0	0	0	0	0	3100635549	237019419	1353912192	1348772247	0.996204	5139945	0.00379637	344056	0.00025412	0.665322	459473	0.000339367	0.924779	1436302	0.00106085	0	0	0.00545071	56
NZ39	TCACATCA	TCACATCA	0	0	0	0	0	0	149249	1	149249	0	0	74258	0.497544	74991	0.502456	13	8.71028e-05	0	0	0	0	0	0	0	0	0	0	0	3098750882	237019319	8128420	8102067	0.996758	26353	0.00324208	1493	0.000183677	0.67582	2782	0.000342256	0.931344	8198	0.00100856	0	0	0.00477657	56
NZ39	TCCGAATC	TCCGAATC	0	0	0	0	0	0	65089	1	65089	0	0	32412	0.497964	32677	0.502036	4	6.14543e-05	0	0	0	0	0	0	0	0	0	0	0	3097695554	237019319	3522969	3509697	0.996233	13272	0.00376728	892	0.000253196	0.660314	1096	0.000311101	0.910584	6018	0.00170822	0	0	0.00603979	56
NZ39	TGATGATC	TGATGATC	0	0	0	0	0	0	127126	1	127126	0	0	63233	0.497404	63893	0.502596	10	7.86621e-05	0	0	0	0	0	0	0	0	0	0	0	3098137777	237019319	6905973	6880779	0.996352	25194	0.00364815	1715	0.000248336	0.672303	2370	0.000343181	0.929536	10080	0.00145961	0	0	0.00569927	56
NZ39	TGATGGAA	TGATGGAA	0	0	0	0	0	0	248068	1	248068	0	0	123817	0.499125	124251	0.500875	9	3.62804e-05	0	0	0	0	0	0	0	0	0	0	0	3099103512	237019319	13558521	13521606	0.997277	36915	0.00272264	1827	0.000134749	0.61029	4896	0.000361101	0.939542	9415	0.000694397	0	0	0.00391289	56
NZ40	ACAGTATC	ACAGTATC	0	0	0	0	0	0	14534	1	14534	0	0	7304	0.502546	7230	0.497454	1	6.88042e-05	0	0	0	0	0	0	0	0	0	0	0	3096805602	237019319	790006	787064	0.996276	2942	0.00372402	205	0.000259492	0.673171	241	0.000305061	0.941909	1172	0.00148353	0	0	0.00577211	56
NZ40	ACTGAATC	ACTGAATC	0	0	0	0	0	0	928694	1	928694	0	0	463773	0.499382	464921	0.500618	37	3.98409e-05	0	0	0	0	0	0	0	0	0	0	0	3099739806	237019319	50699148	50512563	0.99632	186585	0.00368024	13778	0.00027176	0.640296	16275	0.000321011	0.921045	46097	0.000909226	0	0	0.00518224	56
NZ40	ACTGAGAT	ACTGAGAT	0	0	0	0	0	0	13157856	1	13157856	0	0	6581737	0.500213	6576119	0.499787	403	3.06281e-05	0	0	0	0	0	0	0	0	0	0	0	3100596841	237019419	721773061	719231670	0.996479	2541391	0.00352104	212262	0.000294084	0.686133	251420	0.000348337	0.933573	422910	0.000585932	0	0	0.00474939	56
NZ40	AGCGTATC	AGCGTATC	0	0	0	0	0	0	358293	1	358293	0	0	179205	0.500163	179088	0.499837	11	3.07011e-05	0	0	0	0	0	0	0	0	0	0	0	3098790898	237019319	19615543	19545383	0.996423	70160	0.00357676	3173	0.000161759	0.655531	6561	0.00033448	0.933852	14605	0.000744563	0	0	0.00481756	56
NZ40	AGCGTGAT	AGCGTGAT	0	0	0	0	0	0	5649244	1	5649244	0	0	2826925	0.500408	2822319	0.499592	155	2.74373e-05	0	0	0	0	0	0	0	0	0	0	0	3099832882	237019319	309726767	308623607	0.996438	1103160	0.00356172	78427	0.000253214	0.687251	107612	0.000347442	0.930528	201391	0.000650221	0	0	0.0048126	56
NZ40	ATTCGGAT	ATTCGGAT	0	0	0	0	0	0	190235	1	190235	0	0	95585	0.502457	94650	0.497543	8	4.20532e-05	0	0	0	0	0	0	0	0	0	0	0	3098849589	237019319	10402063	10373466	0.997251	28597	0.00274917	1538	0.000147855	0.638492	3491	0.000335607	0.945288	7792	0.000749082	0	0	0.00398171	56
NZ40	CACTGATC	CACTGATC	0	0	0	0	0	0	15295911	1	15295911	0	0	7654789	0.500447	7641122	0.499553	676	4.41948e-05	0	0	0	0	0	0	0	0	0	0	0	3100906749	237019419	838783959	835823432	0.99647	2960527	0.00352955	181879	0.000216837	0.658526	241594	0.000288029	0.919104	648144	0.000772719	0	0	0.00480713	56
NZ40	CAGTCATC	CAGTCATC	0	0	0	0	0	0	15977587	1	15977587	0	0	7987316	0.499908	7990271	0.500092	631	3.94928e-05	0	0	0	0	0	0	0	0	0	0	0	3100320107	237019319	875457915	872278305	0.996368	3179610	0.00363194	230414	0.000263193	0.670198	289894	0.000331134	0.928426	697520	0.000796749	0	0	0.00502301	56
NZ40	CAGTCGAT	CAGTCGAT	0	0	0	0	0	0	2700123	1	2700123	0	0	1351775	0.500635	1348348	0.499365	68	2.5184e-05	0	0	0	0	0	0	0	0	0	0	0	3099681579	237019319	148147999	147636481	0.996547	511518	0.00345275	36983	0.000249636	0.692264	45292	0.000305721	0.928398	95173	0.000642418	0	0	0.00465053	56
NZ40	CGGATGAT	CGGATGAT	0	0	0	0	0	0	181850	1	181850	0	0	90766	0.499126	91084	0.500874	8	4.39923e-05	0	0	0	0	0	0	0	0	0	0	0	3098556778	237019319	9922813	9894796	0.997177	28017	0.00282349	1512	0.000152376	0.616402	3619	0.000364715	0.940591	8418	0.000848348	0	0	0.00418893	56
NZ40	CTATGATC	CTATGATC	0	0	0	0	0	0	5978795	1	5978795	0	0	2991310	0.50032	2987485	0.49968	177	2.96046e-05	0	0	0	0	0	0	0	0	0	0	0	3100201050	237019319	327670127	326469897	0.996337	1200230	0.00366292	84538	0.000257997	0.680073	106936	0.000326353	0.928686	229310	0.00069982	0	0	0.00494709	56
NZ40	CTATGGAT	CTATGGAT	0	0	0	0	0	0	3692875	1	3692875	0	0	1847686	0.500338	1845189	0.499662	128	3.46613e-05	0	0	0	0	0	0	0	0	0	0	0	3099739596	237019319	202353429	201626072	0.996406	727357	0.00359449	56674	0.000280074	0.687952	69039	0.00034118	0.932285	141992	0.000701703	0	0	0.00491745	56
NZ40	GAATCGAT	GAATCGAT	0	0	0	0	0	0	4147991	1	4147991	0	0	2073844	0.499963	2074147	0.500037	141	3.39924e-05	0	0	0	0	0	0	0	0	0	0	0	3100248612	237019419	227364522	226513327	0.996256	851195	0.00374375	59613	0.000262191	0.684968	77351	0.000340207	0.929555	150807	0.000663283	0	0	0.00500943	56
NZ40	GCTCAATC	GCTCAATC	0	0	0	0	0	0	8969559	1	8969559	0	0	4486869	0.500233	4482690	0.499767	363	4.04702e-05	0	0	0	0	0	0	0	0	0	0	0	3100469353	237019419	491215277	489398854	0.996302	1816423	0.00369781	132386	0.000269507	0.667911	162413	0.000330635	0.928294	394925	0.000803975	0	0	0.00510193	56
NZ40	GCTCAGAT	GCTCAGAT	0	0	0	0	0	0	6761289	1	6761289	0	0	3377706	0.499565	3383583	0.500435	214	3.16508e-05	0	0	0	0	0	0	0	0	0	0	0	3099953947	237019419	370958837	369590180	0.99631	1368657	0.00368951	98831	0.00026642	0.670377	122350	0.000329821	0.929718	256905	0.000692543	0	0	0.0049783	56
NZ40	GTACGATC	GTACGATC	0	0	0	0	0	0	3220201	1	3220201	0	0	1610170	0.500022	1610031	0.499978	106	3.29172e-05	0	0	0	0	0	0	0	0	0	0	0	3099931526	237019319	176593149	175984579	0.996554	608570	0.00344617	44602	0.000252569	0.685283	60534	0.000342788	0.936185	111994	0.000634192	0	0	0.00467572	56
NZ40	GTACGGAT	GTACGGAT	0	0	0	0	0	0	1342755	1	1342755	0	0	670854	0.49961	671901	0.50039	46	3.42579e-05	0	0	0	0	0	0	0	0	0	0	0	3098806897	237019319	73607697	73354667	0.996562	253030	0.00343755	18433	0.000250422	0.688656	26753	0.000363454	0.931073	45080	0.000612436	0	0	0.00466386	56
NZ40	GTGCAATC	GTGCAATC	0	0	0	0	0	0	161204	1	161204	0	0	80111	0.496954	81093	0.503046	5	3.10166e-05	0	0	0	0	0	0	0	0	0	0	0	3098713881	237019319	8833854	8809048	0.997192	24806	0.00280806	1362	0.00015418	0.63069	2937	0.000332471	0.940756	5334	0.000603813	0	0	0.00389852	56
NZ40	TAGACATC	TAGACATC	0	0	0	0	0	0	134784	1	134784	0	0	67208	0.498635	67576	0.501365	5	3.70964e-05	0	0	0	0	0	0	0	0	0	0	0	3098784378	237019319	7360794	7329347	0.995728	31447	0.00427223	1219	0.000165607	0.623462	2389	0.000324557	0.927166	6736	0.000915119	0	0	0.00567751	56
NZ40	TAGACGAT	TAGACGAT	0	0	0	0	0	0	150878	1	150878	0	0	75218	0.498535	75660	0.501465	5	3.31394e-05	0	0	0	0	0	0	0	0	0	0	0	3098598418	237019319	8205358	8181126	0.997047	24232	0.00295319	1099	0.000133937	0.66242	2734	0.000333197	0.945867	9614	0.00117167	0	0	0.004592	56
NZ40	TCCGAGAT	TCCGAGAT	0	0	0	0	0	0	246187	1	246187	0	0	123406	0.501269	122781	0.498731	11	4.46815e-05	0	0	0	0	0	0	0	0	0	0	0	3098750810	237019319	13417559	13377139	0.996988	40420	0.00301247	2257	0.000168212	0.673903	4858	0.000362063	0.937834	11840	0.000882426	0	0	0.00442517	56
NZ40	TGCATATC	TGCATATC	0	0	0	0	0	0	9605322	1	9605322	0	0	4805183	0.500263	4800139	0.499737	370	3.85203e-05	0	0	0	0	0	0	0	0	0	0	0	3100327411	237019419	526441082	524561521	0.99643	1879561	0.00357032	140916	0.000267677	0.656242	169151	0.00032131	0.926486	387976	0.000736979	0	0	0.00489628	56
NZ40	TGCATGAT	TGCATGAT	0	0	0	0	0	0	4430815	1	4430815	0	0	2216297	0.500201	2214518	0.499799	149	3.36281e-05	0	0	0	0	0	0	0	0	0	0	0	3099990959	237019319	241480799	240519357	0.996019	961442	0.00398144	55603	0.000230258	0.673165	79871	0.000330755	0.927408	493610	0.0020441	0	0	0.00658655	56
NZ40	TGTACATC	TGTACATC	0	0	0	0	0	0	1462364	1	1462364	0	0	731439	0.500176	730925	0.499824	45	3.07721e-05	0	0	0	0	0	0	0	0	0	0	0	3099447183	237019319	80256544	79988342	0.996658	268202	0.00334181	17461	0.000217565	0.676193	26203	0.000326491	0.929321	44698	0.000556939	0	0	0.0044428	56
[truncated: 9 more columns]

## Sheet: BICRO231
Supplementary Table 1. Summary of sequencing runs.
Seq_library	Sample	Library	#QCFail	QCFailFraction	#DuplicateMarked	DuplicateFraction	#Unmapped	UnmappedFraction	#Mapped	MappedFraction	#MappedRead1	#MappedRead2	RatioMapped2vsMapped1	#MappedForward	MappedForwardFraction	#MappedReverse	MappedReverseFraction	#SecondaryAlignments	SecondaryAlignmentFraction	#SupplementaryAlignments	SupplementaryAlignmentFraction	#SplicedAlignments	SplicedAlignmentFraction	#Pairs	#MappedPairs	MappedPairsFraction	#MappedSameChr	MappedSameChrFraction	#MappedProperPair	MappedProperFraction	#ReferenceBp	#ReferenceNs	#AlignedBases	#MatchedBases	MatchRate	#MismatchedBases	MismatchRate	#DeletionsCigarD	DeletionRate	HomopolymerContextDel	#InsertionsCigarI	InsertionRate	HomopolymerContextIns	#SoftClippedCigarS	SoftClipRate	#HardClippedCigarH	HardClipRate	ErrorRate	MedianReadLength
NZ86	ACAGTATC	ACAGTATC	0	0	0	0	0	0	971149	1	971149	0	0	485894	0.500329	485255	0.499671	1600	0.00164753	0	0	0	0	0	0	0	0	0	0	0	3099330589	237019319	52236269	51986600	0.99522	249669	0.00477961	20986	0.000401752	0.706137	18081	0.000346139	0.92163	114630	0.00219445	0	0	0.00772195	56
NZ86	ACAGTCGA	ACAGTCGA	0	0	0	0	0	0	848310	1	848310	0	0	423923	0.499727	424387	0.500273	1310	0.00154425	0	0	0	0	0	0	0	0	0	0	0	3099702732	237019319	45720103	45507830	0.995357	212273	0.00464288	17417	0.000380948	0.687547	15702	0.000343438	0.925551	94746	0.00207231	0	0	0.00743957	56
NZ86	ACGACATC	ACGACATC	0	0	0	0	0	0	29336	1	29336	0	0	15019	0.511965	14317	0.488035	42	0.00143169	0	0	0	0	0	0	0	0	0	0	0	3097390160	237019319	1568152	1555703	0.992061	12449	0.00793864	618	0.000394094	0.768608	493	0.000314383	0.926978	4452	0.00283901	0	0	0.0114861	56
NZ86	ACGACCGC	ACGACCGC	0	0	0	0	0	0	1123649	1	1123649	0	0	561080	0.499337	562569	0.500663	1641	0.00146042	0	0	0	0	0	0	0	0	0	0	0	3098855505	237019319	60577706	60300944	0.995431	276762	0.00456871	22933	0.000378572	0.736188	21114	0.000348544	0.911907	126639	0.00209052	0	0	0.00738635	56
NZ86	ACGACGAA	ACGACGAA	0	0	0	0	0	0	4754	1	4754	0	0	2345	0.493269	2409	0.506731	10	0.00210349	0	0	0	0	0	0	0	0	0	0	0	3036482217	200630282	251403	250058	0.99465	1345	0.00534998	86	0.00034208	0.77907	80	0.000318214	0.9125	875	0.00348047	0	0	0.00949074	56
NZ86	ACGACTCC	ACGACTCC	0	0	0	0	0	0	1211821	1	1211821	0	0	603738	0.498207	608083	0.501793	143	0.000118004	0	0	0	0	0	0	0	0	0	0	0	3098824607	237019319	66652590	66314570	0.994929	338020	0.00507137	31359	0.000470484	0.754488	27183	0.000407831	0.930251	53215	0.000798394	0	0	0.00674808	56
NZ86	ACTGAATC	ACTGAATC	0	0	0	0	0	0	2514186	1	2514186	0	0	1256608	0.499807	1257578	0.500193	3848	0.00153052	0	0	0	0	0	0	0	0	0	0	0	3099505732	237019419	135483957	134828134	0.995159	655823	0.0048406	54208	0.000400106	0.735021	45047	0.00033249	0.915044	280850	0.00207294	0	0	0.00764613	56
NZ86	ACTGACGA	ACTGACGA	0	0	0	0	0	0	941890	1	941890	0	0	471078	0.500141	470812	0.499859	1615	0.00171464	0	0	0	0	0	0	0	0	0	0	0	3099197450	237019319	50635233	50399962	0.995354	235271	0.00464639	19500	0.000385107	0.741231	18329	0.000361981	0.922418	113422	0.00223998	0	0	0.00763346	56
NZ86	ACTGAGAT	ACTGAGAT	0	0	0	0	0	0	767082	1	767082	0	0	382861	0.499114	384221	0.500886	1346	0.0017547	0	0	0	0	0	0	0	0	0	0	0	3099631926	237019319	41261726	41068104	0.995307	193622	0.00469253	16139	0.000391137	0.742115	15012	0.000363824	0.926659	90210	0.00218629	0	0	0.00763378	56
NZ86	ACTGATCG	ACTGATCG	0	0	0	0	0	0	1053932	1	1053932	0	0	526740	0.499786	527192	0.500214	1759	0.00166899	0	0	0	0	0	0	0	0	0	0	0	3099563011	237019319	56660455	56390458	0.995235	269997	0.00476518	22511	0.000397296	0.730221	19833	0.000350032	0.922755	127564	0.00225138	0	0	0.00776388	56
NZ86	AGCCACGC	AGCCACGC	0	0	0	0	0	0	2499929	1	2499929	0	0	1250193	0.500091	1249736	0.499909	2324	0.000929626	0	0	0	0	0	0	0	0	0	0	0	3099675081	237019319	135711819	134967875	0.994518	743944	0.00548179	76400	0.000562958	0.650825	54096	0.000398609	0.926057	217129	0.00159993	0	0	0.00804329	56
NZ86	AGCCAGAG	AGCCAGAG	0	0	0	0	0	0	2460101	1	2460101	0	0	1230927	0.500356	1229174	0.499644	3953	0.00160684	0	0	0	0	0	0	0	0	0	0	0	3099981851	237019319	132633425	132014445	0.995333	618980	0.00466685	50553	0.000381148	0.732538	47700	0.000359638	0.921803	267164	0.0020143	0	0	0.00742194	56
NZ86	AGCCATCA	AGCCATCA	0	0	0	0	0	0	3001115	1	3001115	0	0	1498371	0.499271	1502744	0.500729	2858	0.000952313	0	0	0	0	0	0	0	0	0	0	0	3099764682	237019319	163036988	162223283	0.995009	813705	0.00499092	70134	0.000430172	0.737973	59600	0.000365561	0.920017	254496	0.00156097	0	0	0.00734763	56
NZ86	AGCGTATC	AGCGTATC	0	0	0	0	0	0	2777303	1	2777303	0	0	1390651	0.50072	1386652	0.49928	3767	0.00135635	0	0	0	0	0	0	0	0	0	0	0	3099994053	237019319	150130286	149428294	0.995324	701992	0.00467589	59551	0.000396662	0.737334	52993	0.00035298	0.925292	277126	0.0018459	0	0	0.00727143	56
NZ86	AGCGTCGA	AGCGTCGA	0	0	0	0	0	0	1947120	1	1947120	0	0	974721	0.500596	972399	0.499404	2403	0.00123413	0	0	0	0	0	0	0	0	0	0	0	3099345332	237019319	105351199	104834434	0.995095	516765	0.00490516	43503	0.000412933	0.737397	38874	0.000368994	0.921644	190770	0.0018108	0	0	0.00749789	56
NZ86	AGCGTGAT	AGCGTGAT	0	0	0	0	0	0	2775127	1	2775127	0	0	1386512	0.499621	1388615	0.500379	3868	0.00139381	0	0	0	0	0	0	0	0	0	0	0	3099741569	237019319	149966004	149259808	0.995291	706196	0.00470904	59443	0.000396377	0.727487	54286	0.000361989	0.925911	280563	0.00187084	0	0	0.00733825	56
NZ86	AGCGTTCG	AGCGTTCG	0	0	0	0	0	0	1542305	1	1542305	0	0	771591	0.500284	770714	0.499716	2166	0.00140439	0	0	0	0	0	0	0	0	0	0	0	3099462762	237019319	83321378	82910567	0.99507	410811	0.00493044	39642	0.000475772	0.721079	32585	0.000391076	0.925855	161375	0.00193678	0	0	0.00773407	56
NZ86	ATGTGCGC	ATGTGCGC	0	0	0	0	0	0	1839655	1	1839655	0	0	919176	0.499646	920479	0.500354	2695	0.00146495	0	0	0	0	0	0	0	0	0	0	0	3099987184	237019319	99276455	98820385	0.995406	456070	0.00459394	36037	0.000362996	0.709993	32346	0.000325817	0.918352	199599	0.00201054	0	0	0.00729329	56
NZ86	ATGTGGAG	ATGTGGAG	0	0	0	0	0	0	1981887	1	1981887	0	0	996390	0.502748	985497	0.497252	1119	0.000564613	0	0	0	0	0	0	0	0	0	0	0	3099118923	237019319	108176281	107587941	0.994561	588340	0.00543872	91625	0.000846997	0.632186	46095	0.00042611	0.930231	138748	0.00128261	0	0	0.00799443	56
NZ86	ATGTGTCA	ATGTGTCA	0	0	0	0	0	0	682654	1	682654	0	0	340987	0.499502	341667	0.500498	29	4.24813e-05	0	0	0	0	0	0	0	0	0	0	0	3098065991	237019319	37580542	37384748	0.99479	195794	0.00520998	19062	0.000507231	0.743783	16589	0.000441425	0.928085	27930	0.000743204	0	0	0.00690184	56
NZ86	ATTCGATC	ATTCGATC	0	0	0	0	0	0	160245	1	160245	0	0	80847	0.504521	79398	0.495479	111	0.000692689	0	0	0	0	0	0	0	0	0	0	0	3097814448	237019319	8734139	8690671	0.995023	43468	0.00497679	3398	0.000389048	0.697763	2658	0.000304323	0.936418	11602	0.00132835	0	0	0.00699851	56
NZ86	ATTCGCGA	ATTCGCGA	0	0	0	0	0	0	2262187	1	2262187	0	0	1129806	0.499431	1132381	0.500569	3398	0.00150209	0	0	0	0	0	0	0	0	0	0	0	3100398329	237019319	121976340	121434738	0.99556	541602	0.00444022	44384	0.000363874	0.721318	42874	0.000351494	0.925479	244971	0.00200835	0	0	0.00716394	56
NZ86	ATTCGGAT	ATTCGGAT	0	0	0	0	0	0	3439647	1	3439647	0	0	1721659	0.500534	1717988	0.499466	4323	0.00125682	0	0	0	0	0	0	0	0	0	0	0	3099548362	237019319	186196746	185282573	0.99509	914173	0.00490972	76433	0.000410496	0.729279	66854	0.00035905	0.920648	329293	0.00176852	0	0	0.00744778	56
NZ86	ATTCGTCG	ATTCGTCG	0	0	0	0	0	0	1306178	1	1306178	0	0	655399	0.501769	650779	0.498231	170	0.000130151	0	0	0	0	0	0	0	0	0	0	0	3099380501	237019319	71992552	71650136	0.995244	342416	0.00475627	32645	0.00045345	0.739838	30538	0.000424183	0.936866	40929	0.000568517	0	0	0.00620242	56
NZ86	CACTGATC	CACTGATC	0	0	0	0	0	0	1115114	1	1115114	0	0	557512	0.49996	557602	0.50004	1875	0.00168144	0	0	0	0	0	0	0	0	0	0	0	3099432674	237019319	59994924	59711706	0.995279	283218	0.0047207	23690	0.000394867	0.727438	20810	0.000346863	0.925901	130641	0.00217753	0	0	0.00763996	56
NZ86	CACTGCGA	CACTGCGA	0	0	0	0	0	0	865887	1	865887	0	0	433418	0.500548	432469	0.499452	1385	0.00159952	0	0	0	0	0	0	0	0	0	0	0	3099244931	237019319	46560577	46339259	0.995247	221318	0.00475333	18339	0.000393874	0.739735	16506	0.000354506	0.918333	103576	0.00222454	0	0	0.00772626	56
NZ86	CAGTCATC	CAGTCATC	0	0	0	0	0	0	3191888	1	3191888	0	0	1596092	0.500046	1595796	0.499954	4578	0.00143426	0	0	0	0	0	0	0	0	0	0	0	3099005514	237019319	172453803	171634539	0.995249	819264	0.00475063	71981	0.000417393	0.742279	61832	0.000358542	0.922678	323681	0.00187691	0	0	0.00740348	56
NZ86	CAGTCCGA	CAGTCCGA	0	0	0	0	0	0	8333	1	8333	0	0	4113	0.49358	4220	0.50642	23	0.00276011	0	0	0	0	0	0	0	0	0	0	0	3037380001	200630282	439418	437166	0.994875	2252	0.00512496	196	0.000446045	0.709184	171	0.000389151	0.900585	1581	0.00359794	0	0	0.0095581	56
NZ86	CAGTCGAT	CAGTCGAT	0	0	0	0	0	0	595991	1	595991	0	0	297957	0.499935	298034	0.500065	52	8.72496e-05	0	0	0	0	0	0	0	0	0	0	0	3099377488	237019319	32721719	32549839	0.994747	171880	0.00525278	15884	0.000485427	0.662868	10549	0.000322385	0.906437	31461	0.000961471	0	0	0.00702206	56
NZ86	CAGTCTCG	CAGTCTCG	0	0	0	0	0	0	786387	1	786387	0	0	393152	0.499947	393235	0.500053	1418	0.00180318	0	0	0	0	0	0	0	0	0	0	0	3099636879	237019319	42247055	42053552	0.99542	193503	0.00458027	15753	0.000372878	0.72748	14864	0.000351835	0.92243	96007	0.00227251	0	0	0.0075775	56
NZ86	CATCAATC	CATCAATC	0	0	0	0	0	0	1345471	1	1345471	0	0	668762	0.497047	676709	0.502953	161	0.000119661	0	0	0	0	0	0	0	0	0	0	0	3099067148	237019319	74031944	73656931	0.994934	375013	0.00506556	38137	0.000515142	0.735873	30268	0.000408851	0.92464	56989	0.000769789	0	0	0.00675934	56
NZ86	CATCACGC	CATCACGC	0	0	0	0	0	0	2034482	1	2034482	0	0	1015400	0.499095	1019082	0.500905	2970	0.00145983	0	0	0	0	0	0	0	0	0	0	0	3099475801	237019319	109869473	109381767	0.995561	487706	0.00443896	40357	0.000367318	0.741234	37631	0.000342506	0.921527	212495	0.00193407	0	0	0.00708285	56
NZ86	CATCAGAA	CATCAGAA	0	0	0	0	0	0	1313957	1	1313957	0	0	656915	0.499952	657042	0.500048	2262	0.00172152	0	0	0	0	0	0	0	0	0	0	0	3099780379	237019319	70687526	70350582	0.995233	336944	0.00476667	27595	0.00039038	0.730096	25037	0.000354193	0.923433	154676	0.00218817	0	0	0.00769941	56
NZ86	CATCATCC	CATCATCC	0	0	0	0	0	0	1673688	1	1673688	0	0	835056	0.498932	838632	0.501068	2420	0.00144591	0	0	0	0	0	0	0	0	0	0	0	3099325268	237019319	90372784	89930728	0.995109	442056	0.00489147	36112	0.000399589	0.736763	31374	0.000347162	0.915567	176248	0.00195023	0	0	0.00758846	56
NZ86	CGGATATC	CGGATATC	0	0	0	0	0	0	453321	1	453321	0	0	225709	0.497901	227612	0.502099	785	0.00173166	0	0	0	0	0	0	0	0	0	0	0	3099443798	237019319	24366082	24250476	0.995255	115606	0.00474455	9738	0.000399654	0.733107	8509	0.000349215	0.920555	54823	0.00224997	0	0	0.00774339	56
NZ86	CGGATCGA	CGGATCGA	0	0	0	0	0	0	2761086	1	2761086	0	0	1379399	0.499586	1381687	0.500414	3919	0.00141937	0	0	0	0	0	0	0	0	0	0	0	3100333808	237019319	149163010	148482724	0.995439	680286	0.00456069	56717	0.000380235	0.720895	53723	0.000360163	0.922268	280853	0.00188286	0	0	0.00718395	56
NZ86	CGGATGAT	CGGATGAT	0	0	0	0	0	0	193442	1	193442	0	0	96765	0.500227	96677	0.499773	231	0.00119416	0	0	0	0	0	0	0	0	0	0	0	3098296872	237019319	10487798	10436113	0.995072	51685	0.00492811	4529	0.000431835	0.739457	3983	0.000379775	0.926939	17929	0.00170951	0	0	0.00744923	56
NZ86	CGGATTCG	CGGATTCG	0	0	0	0	0	0	2782285	1	2782285	0	0	1393063	0.50069	1389222	0.49931	4220	0.00151674	0	0	0	0	0	0	0	0	0	0	0	3099700314	237019319	150049197	149342841	0.995293	706356	0.0047075	58931	0.000392745	0.731432	55131	0.000367419	0.926756	300483	0.00200256	0	0	0.00747022	56
NZ86	CGTGTCGC	CGTGTCGC	0	0	0	0	0	0	1863176	1	1863176	0	0	930123	0.499214	933053	0.500786	2323	0.0012468	0	0	0	0	0	0	0	0	0	0	0	3099358814	237019319	100760059	100273938	0.995175	486121	0.00482454	42011	0.000416941	0.732594	37205	0.000369244	0.924204	186122	0.00184718	0	0	0.00745791	56
NZ86	CGTGTGAG	CGTGTGAG	0	0	0	0	0	0	1759638	1	1759638	0	0	878358	0.49917	881280	0.50083	2664	0.00151395	0	0	0	0	0	0	0	0	0	0	0	3099879530	237019319	94899600	94460088	0.995369	439512	0.00463134	37613	0.000396345	0.733363	36750	0.000387251	0.927837	189536	0.00199723	0	0	0.00741216	56
NZ86	CGTGTTCA	CGTGTTCA	0	0	0	0	0	0	1542601	1	1542601	0	0	771113	0.499878	771488	0.500122	2703	0.00175224	0	0	0	0	0	0	0	0	0	0	0	3099947181	237019319	83003008	82646837	0.995709	356171	0.00429106	27101	0.000326506	0.718793	25700	0.000309627	0.911479	179706	0.00216505	0	0	0.00709225	56
NZ86	CTAACCGC	CTAACCGC	0	0	0	0	0	0	2663756	1	2663756	0	0	1329064	0.498944	1334692	0.501056	3505	0.00131581	0	0	0	0	0	0	0	0	0	0	0	3099903534	237019319	143992589	143295300	0.995157	697289	0.00484253	61161	0.000424751	0.742041	51141	0.000355164	0.915137	269879	0.00187426	0	0	0.00749671	56
NZ86	CTAACGAG	CTAACGAG	0	0	0	0	0	0	2412366	1	2412366	0	0	1206897	0.500296	1205469	0.499704	4008	0.00166144	0	0	0	0	0	0	0	0	0	0	0	3100525848	237019319	129948460	129344290	0.995351	604170	0.0046493	49490	0.000380843	0.693554	43749	0.000336664	0.919998	270318	0.00208019	0	0	0.00744701	56
NZ86	CTAACTCA	CTAACTCA	0	0	0	0	0	0	2441270	1	2441270	0	0	1218105	0.498964	1223165	0.501036	2810	0.00115104	0	0	0	0	0	0	0	0	0	0	0	3099997839	237019319	132217959	131557041	0.995001	660918	0.0049987	55612	0.000420609	0.739355	47504	0.000359286	0.911902	232123	0.00175561	0	0	0.0075342	56
NZ86	CTATGATC	CTATGATC	0	0	0	0	0	0	3667415	1	3667415	0	0	1835323	0.500441	1832092	0.499559	4652	0.00126847	0	0	0	0	0	0	0	0	0	0	0	3099488434	237019319	198406595	197438234	0.995119	968361	0.00488069	82990	0.000418282	0.742897	71721	0.000361485	0.921683	358116	0.00180496	0	0	0.00746542	56
NZ86	CTATGCGA	CTATGCGA	0	0	0	0	0	0	13400	1	13400	0	0	6886	0.513881	6514	0.486119	24	0.00179104	0	0	0	0	0	0	0	0	0	0	0	3037313781	200630282	711844	707877	0.994427	3967	0.00557285	283	0.000397559	0.763251	275	0.000386321	0.909091	2202	0.00309337	0	0	0.0094501	56
NZ86	CTATGGAT	CTATGGAT	0	0	0	0	0	0	6040	1	6040	0	0	2974	0.492384	3066	0.507616	14	0.00231788	0	0	0	0	0	0	0	0	0	0	0	3036676423	200630282	317472	315727	0.994503	1745	0.00549655	115	0.000362237	0.730435	105	0.000330738	0.92381	1204	0.00379246	0	0	0.00998198	56
NZ86	CTATGTCG	CTATGTCG	0	0	0	0	0	0	3241015	1	3241015	0	0	1621003	0.500153	1620012	0.499847	3185	0.000982717	0	0	0	0	0	0	0	0	0	0	0	3099567512	237019319	176224883	175345930	0.995012	878953	0.00498768	83940	0.000476323	0.742173	73226	0.000415526	0.92758	261479	0.00148378	0	0	0.00736331	56
NZ86	GAATCATC	GAATCATC	0	0	0	0	0	0	3048655	1	3048655	0	0	1524042	0.499906	1524613	0.500094	2733	0.000896461	0	0	0	0	0	0	0	0	0	0	0	3099788636	237019319	165849127	165022254	0.995014	826873	0.00498569	68797	0.000414817	0.734858	57404	0.000346122	0.915807	236897	0.00142839	0	0	0.00717502	56
NZ86	GAATCCGA	GAATCCGA	0	0	0	0	0	0	2051053	1	2051053	0	0	1024420	0.499461	1026633	0.500539	2882	0.00140513	0	0	0	0	0	0	0	0	0	0	0	3099659666	237019319	110783048	110258177	0.995262	524871	0.00473783	43483	0.000392506	0.733528	38853	0.000350713	0.916583	211347	0.00190776	0	0	0.0073888	56
NZ86	GAATCGAT	GAATCGAT	0	0	0	0	0	0	2529692	1	2529692	0	0	1262399	0.499033	1267293	0.500967	3413	0.00134918	0	0	0	0	0	0	0	0	0	0	0	3099136454	237019319	136828716	136169300	0.995181	659416	0.00481928	54807	0.000400552	0.726878	49298	0.00036029	0.922593	248283	0.00181455	0	0	0.00739468	56
NZ86	GAATCTCG	GAATCTCG	0	0	0	0	0	0	2921939	1	2921939	0	0	1462780	0.50062	1459159	0.49938	4190	0.00143398	0	0	0	0	0	0	0	0	0	0	0	3099516985	237019319	157770309	157015802	0.995218	754507	0.00478231	62911	0.000398751	0.722958	54963	0.000348374	0.923385	303201	0.00192179	0	0	0.00745122	56
NZ86	GACACCGC	GACACCGC	0	0	0	0	0	0	2247408	1	2247408	0	0	1123911	0.500092	1123497	0.499908	3558	0.00158316	0	0	0	0	0	0	0	0	0	0	0	3100452146	237019319	121108471	120559340	0.995466	549131	0.00453421	43336	0.000357828	0.716841	39874	0.000329242	0.918945	248990	0.00205593	0	0	0.0072772	56
NZ86	GACACGAG	GACACGAG	0	0	0	0	0	0	6796	1	6796	0	0	3425	0.503973	3371	0.496027	13	0.00191289	0	0	0	0	0	0	0	0	0	0	0	3036900266	200630282	359229	357538	0.995293	1691	0.0047073	146	0.000406426	0.732877	117	0.000325698	0.91453	1282	0.00356875	0	0	0.00900818	56
NZ86	GACACTCA	GACACTCA	0	0	0	0	0	0	1702844	1	1702844	0	0	850262	0.499319	852582	0.500681	2340	0.00137417	0	0	0	0	0	0	0	0	0	0	0	3099385603	237019319	91948551	91514821	0.995283	433730	0.00471709	36143	0.000393079	0.730294	32852	0.000357287	0.92381	179515	0.00195234	0	0	0.0074198	56
NZ86	GCTCAATC	GCTCAATC	0	0	0	0	0	0	4954	1	4954	0	0	2536	0.51191	2418	0.48809	7	0.001413	0	0	0	0	0	0	0	0	0	0	0	3037049603	200630282	265393	263339	0.992261	2054	0.00773947	111	0.000418248	0.711712	84	0.000316512	0.880952	694	0.00261499	0	0	0.0110892	56
NZ86	GCTCACGA	GCTCACGA	0	0	0	0	0	0	22059	1	22059	0	0	11014	0.499297	11045	0.500703	50	0.00226665	0	0	0	0	0	0	0	0	0	0	0	3037735756	200630282	1168681	1162844	0.995005	5837	0.00499452	526	0.00045008	0.720532	439	0.000375637	0.927107	3794	0.00324639	0	0	0.00906663	56
NZ86	GCTCAGAT	GCTCAGAT	0	0	0	0	0	0	153831	1	153831	0	0	76855	0.499607	76976	0.500393	223	0.00144964	0	0	0	0	0	0	0	0	0	0	0	3097285229	237019319	8292353	8251884	0.99512	40469	0.00488028	3467	0.000418096	0.728295	3084	0.000371909	0.924773	17189	0.00207287	0	0	0.00774316	56
NZ86	GCTCATCG	GCTCATCG	0	0	0	0	0	0	2271156	1	2271156	0	0	1136815	0.500545	1134341	0.499455	3345	0.00147282	0	0	0	0	0	0	0	0	0	0	0	3099684274	237019319	122424368	121838429	0.995214	585939	0.00478613	47753	0.000390061	0.730216	43293	0.000353631	0.923175	251384	0.00205338	0	0	0.0075832	56
NZ86	GCTTGCGC	GCTTGCGC	0	0	0	0	0	0	1404574	1	1404574	0	0	701275	0.499279	703299	0.500721	2068	0.00147233	0	0	0	0	0	0	0	0	0	0	0	3099621850	237019319	75730650	75390127	0.995503	340523	0.0044965	29890	0.000394688	0.739144	27294	0.000360409	0.922474	153406	0.00202568	0	0	0.00727728	56
NZ86	GCTTGGAG	GCTTGGAG	0	0	0	0	0	0	18911	1	18911	0	0	9230	0.488076	9681	0.511924	14	0.00074031	0	0	0	0	0	0	0	0	0	0	0	3037300675	200630282	1025756	1020619	0.994992	5137	0.00500801	377	0.000367534	0.71618	415	0.00040458	0.93494	1676	0.00163392	0	0	0.00741404	56
NZ86	GCTTGTCA	GCTTGTCA	0	0	0	0	0	0	1588213	1	1588213	0	0	794812	0.500444	793401	0.499556	1723	0.00108487	0	0	0	0	0	0	0	0	0	0	0	3098955057	237019319	86097250	85669187	0.995028	428063	0.00497185	36275	0.000421326	0.737257	31811	0.000369478	0.91591	145706	0.00169234	0	0	0.007455	56
NZ86	GTACGATC	GTACGATC	0	0	0	0	0	0	333290	1	333290	0	0	165973	0.497984	167317	0.502016	523	0.0015692	0	0	0	0	0	0	0	0	0	0	0	3099075746	237019319	17946889	17863827	0.995372	83062	0.00462821	7474	0.000416451	0.745785	6617	0.000368699	0.928366	38386	0.00213887	0	0	0.00755223	56
NZ86	GTACGCGA	GTACGCGA	0	0	0	0	0	0	869816	1	869816	0	0	435043	0.500155	434773	0.499845	1618	0.00186016	0	0	0	0	0	0	0	0	0	0	0	3099716911	237019319	46699997	46499514	0.995707	200483	0.004293	14641	0.000313512	0.710334	15285	0.000327302	0.916847	107826	0.00230891	0	0	0.00724272	56
NZ86	GTACGGAT	GTACGGAT	0	0	0	0	0	0	747454	1	747454	0	0	373671	0.499925	373783	0.500075	1212	0.0016215	0	0	0	0	0	0	0	0	0	0	0	3099327175	237019319	40234867	40043060	0.995233	191807	0.00476718	15837	0.000393614	0.740229	14594	0.00036272	0.924147	86717	0.00215527	0	0	0.00767879	56
NZ86	GTACGTCG	GTACGTCG	0	0	0	0	0	0	869019	1	869019	0	0	435398	0.501022	433621	0.498978	1450	0.00166855	0	0	0	0	0	0	0	0	0	0	0	3099170992	237019319	46685137	46470105	0.995394	215032	0.00460601	18809	0.000402891	0.742251	17055	0.00036532	0.925418	106794	0.00228754	0	0	0.00766175	56
NZ86	GTCGTATC	GTCGTATC	0	0	0	0	0	0	16283	1	16283	0	0	8199	0.503531	8084	0.496469	29	0.001781	0	0	0	0	0	0	0	0	0	0	0	3097003516	237019319	864009	858552	0.993684	5457	0.00631591	318	0.000368052	0.738994	306	0.000354163	0.905229	2760	0.00319441	0	0	0.0102325	56
NZ86	GTCGTCGC	GTCGTCGC	0	0	0	0	0	0	42494	1	42494	0	0	21076	0.495976	21418	0.504024	87	0.00204735	0	0	0	0	0	0	0	0	0	0	0	3097476351	237019319	2279954	2268991	0.995192	10963	0.00480843	950	0.000416675	0.718947	879	0.000385534	0.932878	5514	0.00241847	0	0	0.00802911	56
NZ86	GTCGTGAA	GTCGTGAA	0	0	0	0	0	0	832513	1	832513	0	0	415941	0.499621	416572	0.500379	1384	0.00166244	0	0	0	0	0	0	0	0	0	0	0	3099386727	237019319	44800361	44583604	0.995162	216757	0.00483829	17088	0.000381425	0.733088	16517	0.00036868	0.9265	97646	0.00217958	0	0	0.00776797	56
NZ86	GTCGTTCC	GTCGTTCC	0	0	0	0	0	0	1075295	1	1075295	0	0	537668	0.500019	537627	0.499981	1499	0.00139404	0	0	0	0	0	0	0	0	0	0	0	3099355545	237019419	57998229	57719119	0.995188	279110	0.00481239	22720	0.000391736	0.72346	20217	0.00034858	0.919029	117820	0.00203144	0	0	0.00758415	56
NZ86	GTGCAATC	GTGCAATC	0	0	0	0	0	0	662163	1	662163	0	0	330989	0.49986	331174	0.50014	128	0.000193306	0	0	0	0	0	0	0	0	0	0	0	3099533945	237019319	36338828	36154124	0.994917	184704	0.00508283	15128	0.000416304	0.671801	11908	0.000327694	0.909976	33926	0.000933602	0	0	0.00676043	56
NZ86	GTGCACGA	GTGCACGA	0	0	0	0	0	0	898897	1	898897	0	0	449756	0.500342	449141	0.499658	1319	0.00146735	0	0	0	0	0	0	0	0	0	0	0	3099326621	237019319	48492521	48258876	0.995182	233645	0.00481817	20117	0.000414847	0.746533	17858	0.000368263	0.926756	97811	0.00201703	0	0	0.00761831	56
NZ86	TAGACATC	TAGACATC	0	0	0	0	0	0	3036956	1	3036956	0	0	1516907	0.499483	1520049	0.500517	4015	0.00132205	0	0	0	0	0	0	0	0	0	0	0	3099604998	237019319	164321257	163523036	0.995142	798221	0.00485769	67790	0.000412546	0.744889	59149	0.00035996	0.92617	297317	0.00180936	0	0	0.00743955	56
NZ86	TAGACCGA	TAGACCGA	0	0	0	0	0	0	2263958	1	2263958	0	0	1130663	0.499419	1133295	0.500581	3426	0.00151328	0	0	0	0	0	0	0	0	0	0	0	3099419336	237019319	122100215	121541467	0.995424	558748	0.00457614	45779	0.00037493	0.732607	43033	0.00035244	0.922896	244638	0.00200358	0	0	0.0073071	56
NZ86	TAGACGAT	TAGACGAT	0	0	0	0	0	0	2892450	1	2892450	0	0	1447311	0.500375	1445139	0.499625	4322	0.00149423	0	0	0	0	0	0	0	0	0	0	0	3100048161	237019319	156118775	155406931	0.99544	711844	0.00455963	57261	0.000366778	0.718866	53356	0.000341765	0.922389	302985	0.00194073	0	0	0.00720891	56
NZ86	TAGACTCG	TAGACTCG	0	0	0	0	0	0	1121030	1	1121030	0	0	559596	0.49918	561434	0.50082	2077	0.00185276	0	0	0	0	0	0	0	0	0	0	0	3099748964	237019319	60295787	60005756	0.99519	290031	0.00481014	24034	0.000398602	0.735458	21143	0.000350655	0.923568	133662	0.00221677	0	0	0.00777617	56
NZ86	TAGGTCGC	TAGGTCGC	0	0	0	0	0	0	810753	1	810753	0	0	404945	0.499468	405808	0.500532	1271	0.00156768	0	0	0	0	0	0	0	0	0	0	0	3099149500	237019319	43658842	43450532	0.995229	208310	0.00477131	17224	0.000394513	0.734556	15944	0.000365195	0.923419	93530	0.00214229	0	0	0.00767331	56
NZ86	TAGGTGAG	TAGGTGAG	0	0	0	0	0	0	2049	1	2049	0	0	1038	0.506589	1011	0.493411	5	0.00244021	0	0	0	0	0	0	0	0	0	0	0	3036661415	200630282	107357	106838	0.995166	519	0.00483434	37	0.000344645	0.621622	29	0.000270127	1	485	0.00451764	0	0	0.00996675	56
NZ86	TAGGTTCA	TAGGTTCA	0	0	0	0	0	0	1611927	1	1611927	0	0	805140	0.499489	806787	0.500511	825	0.00051181	0	0	0	0	0	0	0	0	0	0	0	3099050555	237019319	87913685	87418033	0.994362	495652	0.00563794	57671	0.000655996	0.612335	36832	0.000418956	0.909942	116031	0.00131983	0	0	0.00803272	56
NZ86	TCACACGC	TCACACGC	0	0	0	0	0	0	1604623	1	1604623	0	0	803375	0.500663	801248	0.499337	2258	0.00140718	0	0	0	0	0	0	0	0	0	0	0	3100106547	237019319	86584119	86176997	0.995298	407122	0.00470204	34085	0.000393663	0.740238	30808	0.000355816	0.921968	171253	0.00197788	0	0	0.0074294	56
NZ86	TCACAGAG	TCACAGAG	0	0	0	0	0	0	1921780	1	1921780	0	0	961428	0.50028	960352	0.49972	2762	0.00143721	0	0	0	0	0	0	0	0	0	0	0	3099727493	237019319	103764913	103259941	0.995133	504972	0.0048665	41920	0.00040399	0.734232	37027	0.000356835	0.92122	201967	0.00194639	0	0	0.00757372	56
NZ86	TCACATCA	TCACATCA	0	0	0	0	0	0	13766	1	13766	0	0	6877	0.499564	6889	0.500436	35	0.0025425	0	0	0	0	0	0	0	0	0	0	0	3037393547	200630282	728002	724498	0.995187	3504	0.00481317	279	0.000383241	0.706093	258	0.000354395	0.922481	2506	0.0034423	0	0	0.00899311	56
NZ86	TCCGAATC	TCCGAATC	0	0	0	0	0	0	4056588	1	4056588	0	0	2028116	0.499956	2028472	0.500044	4233	0.00104349	0	0	0	0	0	0	0	0	0	0	0	3099819302	237019319	220149861	219055189	0.995028	1094672	0.00497239	94495	0.00042923	0.732864	77062	0.000350043	0.919364	358358	0.00162779	0	0	0.00737946	56
NZ86	TCCGACGA	TCCGACGA	0	0	0	0	0	0	3313319	1	3313319	0	0	1655115	0.499534	1658204	0.500466	4854	0.001465	0	0	0	0	0	0	0	0	0	0	0	3099917911	237019419	178956736	178149405	0.995489	807331	0.00451132	64589	0.00036092	0.722244	61230	0.00034215	0.921133	338192	0.0018898	0	0	0.00710419	56
NZ86	TCCGAGAT	TCCGAGAT	0	0	0	0	0	0	4933702	1	4933702	0	0	2468398	0.500314	2465304	0.499686	5979	0.00121187	0	0	0	0	0	0	0	0	0	0	0	3099967203	237019319	267195340	265912210	0.995198	1283130	0.00480222	111148	0.00041598	0.74596	99749	0.000373319	0.92435	448767	0.00167955	0	0	0.00727106	56
NZ86	TCCGATCG	TCCGATCG	0	0	0	0	0	0	3457623	1	3457623	0	0	1724589	0.498779	1733034	0.501221	4870	0.00140848	0	0	0	0	0	0	0	0	0	0	0	3099575436	237019419	186886445	185994251	0.995226	892194	0.00477399	75970	0.000406504	0.742056	67555	0.000361476	0.924595	347484	0.00185933	0	0	0.0074013	56
NZ86	TGATGATC	TGATGATC	0	0	0	0	0	0	983202	1	983202	0	0	491372	0.499767	491830	0.500233	1729	0.00175854	0	0	0	0	0	0	0	0	0	0	0	3098961327	237019319	52918802	52685521	0.995592	233281	0.00440828	19632	0.000370983	0.727486	17565	0.000331924	0.919898	114598	0.00216554	0	0	0.00727673	56
NZ86	TGATGCGC	TGATGCGC	0	0	0	0	0	0	1474499	1	1474499	0	0	737415	0.500112	737084	0.499888	2475	0.00167854	0	0	0	0	0	0	0	0	0	0	0	3099567667	237019319	79355530	79008336	0.995625	347194	0.00437517	28596	0.000360353	0.735068	27640	0.000348306	0.919899	171852	0.0021656	0	0	0.00724943	56
NZ86	TGATGGAA	TGATGGAA	0	0	0	0	0	0	4919	1	4919	0	0	2502	0.50864	2417	0.49136	10	0.00203293	0	0	0	0	0	0	0	0	0	0	0	3036665113	200630282	263359	261905	0.994479	1454	0.00552098	228	0.000865738	0.846491	88	0.000334145	0.920455	726	0.00275669	0	0	0.00947756	56
NZ86	TGATGTCC	TGATGTCC	0	0	0	0	0	0	1648982	1	1648982	0	0	824506	0.500009	824476	0.499991	2036	0.0012347	0	0	0	0	0	0	0	0	0	0	0	3099466244	237019319	89297593	88863843	0.995143	433750	0.00485735	36343	0.000406987	0.736813	31399	0.000351622	0.919042	159125	0.00178196	0	0	0.00739793	56
NZ86	TGCATATC	TGCATATC	0	0	0	0	0	0	2842047	1	2842047	0	0	1421474	0.500159	1420573	0.499841	4177	0.00146972	0	0	0	0	0	0	0	0	0	0	0	3099416477	237019319	153377968	152660481	0.995322	717487	0.0046779	61935	0.000403806	0.735755	53899	0.000351413	0.92139	300642	0.00196014	0	0	0.00739326	56
NZ86	TGCATCGA	TGCATCGA	0	0	0	0	0	0	965239	1	965239	0	0	481658	0.499004	483581	0.500996	1675	0.00173532	0	0	0	0	0	0	0	0	0	0	0	3099562669	237019319	51902439	51658256	0.995295	244183	0.00470465	20462	0.00039424	0.727544	18390	0.000354319	0.925122	114900	0.00221377	0	0	0.00766698	56
NZ86	TGCATGAT	TGCATGAT	0	0	0	0	0	0	19608	1	19608	0	0	9353	0.476999	10255	0.523001	20	0.00101999	0	0	0	0	0	0	0	0	0	0	0	3037059430	200630282	1044439	1038337	0.994158	6102	0.00584237	439	0.000420321	0.758542	361	0.00034564	0.903047	4439	0.00425013	0	0	0.0108585	56
NZ86	TGCATTCG	TGCATTCG	0	0	0	0	0	0	1013346	1	1013346	0	0	507362	0.50068	505984	0.49932	1472	0.00145261	0	0	0	0	0	0	0	0	0	0	0	3098507872	237019319	54624764	54355153	0.995064	269611	0.00493569	23541	0.000430958	0.738244	19642	0.000359581	0.915487	114511	0.00209632	0	0	0.00782255	56
NZ86	TGTACATC	TGTACATC	0	0	0	0	0	0	1104165	1	1104165	0	0	552498	0.500376	551667	0.499624	1893	0.00171442	0	0	0	0	0	0	0	0	0	0	0	3100034282	237019319	59334632	59060471	0.995379	274161	0.00462059	23327	0.000393143	0.731513	20373	0.000343358	0.922495	133981	0.00225806	0	0	0.00761515	56
NZ86	TGTACCGA	TGTACCGA	0	0	0	0	0	0	1310083	1	1310083	0	0	655579	0.50041	654504	0.49959	2272	0.00173424	0	0	0	0	0	0	0	0	0	0	0	3099843325	237019319	70420782	70092004	0.995331	328778	0.00466876	28142	0.000399626	0.726992	24219	0.000343918	0.91965	158090	0.00224493	0	0	0.00765724	56
[truncated: 9 more columns]

## Sheet: BICRO232
Supplementary Table 1. Summary of sequencing runs.
Seq_library	Sample	Library	#QCFail	QCFailFraction	#DuplicateMarked	DuplicateFraction	#Unmapped	UnmappedFraction	#Mapped	MappedFraction	#MappedRead1	#MappedRead2	RatioMapped2vsMapped1	#MappedForward	MappedForwardFraction	#MappedReverse	MappedReverseFraction	#SecondaryAlignments	SecondaryAlignmentFraction	#SupplementaryAlignments	SupplementaryAlignmentFraction	#SplicedAlignments	SplicedAlignmentFraction	#Pairs	#MappedPairs	MappedPairsFraction	#MappedSameChr	MappedSameChrFraction	#MappedProperPair	MappedProperFraction	#ReferenceBp	#ReferenceNs	#AlignedBases	#MatchedBases	MatchRate	#MismatchedBases	MismatchRate	#DeletionsCigarD	DeletionRate	HomopolymerContextDel	#InsertionsCigarI	InsertionRate	HomopolymerContextIns	#SoftClippedCigarS	SoftClipRate	#HardClippedCigarH	HardClipRate	ErrorRate	MedianReadLength
BICRO232	ACAGTATC	ACAGTATC	0	0	0	0	0	0	700595	1	700595	0	0	349954	0.49951	350641	0.50049	987	0.0014088	0	0	0	0	0	0	0	0	0	0	0	3099525513	237019319	37847375	37674661	0.995437	172714	0.00456343	13719	0.000362482	0.705445	11423	0.000301817	0.913333	70958	0.00187485	0	0	0.00710258	56
BICRO232	ACAGTCGA	ACAGTCGA	0	0	0	0	0	0	813435	1	813435	0	0	406738	0.500025	406697	0.499975	1408	0.00173093	0	0	0	0	0	0	0	0	0	0	0	3098572341	237019319	43780214	43566541	0.995119	213673	0.00488058	17834	0.000407353	0.723001	14086	0.000321744	0.918075	94701	0.0021631	0	0	0.00777278	56
BICRO232	ACGACATC	ACGACATC	0	0	0	0	0	0	9239	1	9239	0	0	4903	0.530685	4336	0.469315	8	0.000865895	0	0	0	0	0	0	0	0	0	0	0	3096178364	237019319	500887	496275	0.990792	4612	0.00920767	196	0.000391306	0.739796	168	0.000335405	0.922619	874	0.0017449	0	0	0.0116793	56
BICRO232	ACGACCGC	ACGACCGC	0	0	0	0	0	0	855204	1	855204	0	0	426736	0.498987	428468	0.501013	1121	0.0013108	0	0	0	0	0	0	0	0	0	0	0	3100035833	237019319	46281845	46089796	0.99585	192049	0.00414955	16378	0.000353875	0.728416	14263	0.000308177	0.91825	81640	0.00176397	0	0	0.00657558	56
BICRO232	ACGACGAA	ACGACGAA	0	0	0	0	0	0	727363	1	727363	0	0	364179	0.500684	363184	0.499316	946	0.00130059	0	0	0	0	0	0	0	0	0	0	0	3098910511	237019319	39284577	39105042	0.99543	179535	0.00457011	18195	0.000463159	0.665842	13526	0.000344308	0.925625	75630	0.00192518	0	0	0.00730276	56
BICRO232	ACGACTCC	ACGACTCC	0	0	0	0	0	0	854187	1	854187	0	0	426532	0.499343	427655	0.500657	1200	0.00140484	0	0	0	0	0	0	0	0	0	0	0	3099521506	237019319	46208320	46012215	0.995756	196105	0.00424393	16128	0.000349028	0.726935	13607	0.000294471	0.92085	83063	0.00179758	0	0	0.00668501	56
BICRO232	ACTGAATC	ACTGAATC	0	0	0	0	0	0	1690186	1	1690186	0	0	843530	0.499075	846656	0.500925	1729	0.00102296	0	0	0	0	0	0	0	0	0	0	0	3099486349	237019319	91841242	91442735	0.995661	398507	0.00433909	32825	0.00035741	0.72984	26828	0.000292113	0.911697	135622	0.0014767	0	0	0.00646531	56
BICRO232	ACTGACGA	ACTGACGA	0	0	0	0	0	0	830788	1	830788	0	0	416322	0.501117	414466	0.498883	991	0.00119284	0	0	0	0	0	0	0	0	0	0	0	3099439100	237019319	45066961	44866633	0.995555	200328	0.00444512	19738	0.000437971	0.755396	17629	0.000391173	0.932781	71346	0.00158311	0	0	0.00685737	56
BICRO232	ACTGAGAT	ACTGAGAT	0	0	0	0	0	0	380203	1	380203	0	0	190119	0.500046	190084	0.499954	19	4.99733e-05	0	0	0	0	0	0	0	0	0	0	0	3095693981	237019319	20934924	20829001	0.99494	105923	0.00505963	9435	0.000450682	0.761208	7168	0.000342394	0.897042	13211	0.000631051	0	0	0.00648376	56
BICRO232	ACTGATCG	ACTGATCG	0	0	0	0	0	0	768825	1	768825	0	0	384346	0.499914	384479	0.500086	948	0.00123305	0	0	0	0	0	0	0	0	0	0	0	3099134873	237019319	41616917	41432011	0.995557	184906	0.00444305	16798	0.000403634	0.731575	14335	0.000344451	0.927241	72561	0.00174355	0	0	0.00693468	56
BICRO232	AGCCACGC	AGCCACGC	0	0	0	0	0	0	2487112	1	2487112	0	0	1244267	0.500286	1242845	0.499714	2278	0.000915922	0	0	0	0	0	0	0	0	0	0	0	3099765502	237019319	135426974	134803939	0.995399	623035	0.00460052	62159	0.000458985	0.738751	50958	0.000376277	0.927705	179275	0.00132378	0	0	0.00675956	56
BICRO232	AGCCAGAG	AGCCAGAG	0	0	0	0	0	0	1988070	1	1988070	0	0	994596	0.500282	993474	0.499718	2354	0.00118406	0	0	0	0	0	0	0	0	0	0	0	3099685457	237019319	107886345	107455887	0.99601	430458	0.00398992	36570	0.000338968	0.738447	34301	0.000317936	0.923063	168199	0.00155904	0	0	0.00620586	56
BICRO232	AGCCATCA	AGCCATCA	0	0	0	0	0	0	1799950	1	1799950	0	0	898497	0.499179	901453	0.500821	1824	0.00101336	0	0	0	0	0	0	0	0	0	0	0	3100136703	237019319	97783526	97378914	0.995862	404612	0.00413783	33907	0.000346756	0.738609	30778	0.000314756	0.917798	145302	0.00148596	0	0	0.0062853	56
BICRO232	AGCGTATC	AGCGTATC	0	0	0	0	0	0	1804768	1	1804768	0	0	900370	0.498884	904398	0.501116	1995	0.00110541	0	0	0	0	0	0	0	0	0	0	0	3099682315	237019419	98009107	97594252	0.995767	414855	0.00423282	34126	0.000348192	0.725576	30401	0.000310185	0.919213	148282	0.00151294	0	0	0.00640414	56
BICRO232	AGCGTCGA	AGCGTCGA	0	0	0	0	0	0	1164265	1	1164265	0	0	581202	0.499201	583063	0.500799	1714	0.00147217	0	0	0	0	0	0	0	0	0	0	0	3099479572	237019319	62926635	62652148	0.995638	274487	0.00436202	22809	0.00036247	0.733088	20521	0.00032611	0.920862	116970	0.00185883	0	0	0.00690943	56
BICRO232	AGCGTGAT	AGCGTGAT	0	0	0	0	0	0	1929092	1	1929092	0	0	963526	0.499471	965566	0.500529	1859	0.000963666	0	0	0	0	0	0	0	0	0	0	0	3099324484	237019319	104932422	104485740	0.995743	446682	0.00425685	38379	0.00036575	0.737982	33865	0.000322732	0.923431	147590	0.00140652	0	0	0.00635186	56
BICRO232	AGCGTTCG	AGCGTTCG	0	0	0	0	0	0	1179967	1	1179967	0	0	589487	0.499579	590480	0.500421	1360	0.00115257	0	0	0	0	0	0	0	0	0	0	0	3099649319	237019319	64062351	63790637	0.995759	271714	0.0042414	22512	0.000351408	0.729789	20027	0.000312617	0.919509	98448	0.00153675	0	0	0.00644218	56
BICRO232	ATGTGCGC	ATGTGCGC	0	0	0	0	0	0	1531710	1	1531710	0	0	766016	0.500105	765694	0.499895	1565	0.00102173	0	0	0	0	0	0	0	0	0	0	0	3099551054	237019319	83248238	82892127	0.995722	356111	0.0042777	30400	0.000365173	0.737599	26175	0.000314421	0.920229	123915	0.0014885	0	0	0.00644579	56
BICRO232	ATGTGGAG	ATGTGGAG	0	0	0	0	0	0	1686446	1	1686446	0	0	842218	0.499404	844228	0.500596	2130	0.00126301	0	0	0	0	0	0	0	0	0	0	0	3099716088	237019419	91342246	90955334	0.995764	386912	0.00423585	32659	0.000357545	0.731376	29685	0.000324987	0.919084	156016	0.00170804	0	0	0.00662642	56
BICRO232	ATGTGTCA	ATGTGTCA	0	0	0	0	0	0	697371	1	697371	0	0	348361	0.499535	349010	0.500465	737	0.00105683	0	0	0	0	0	0	0	0	0	0	0	3099337962	237019319	37854631	37689347	0.995634	165284	0.00436628	15753	0.000416145	0.742208	13981	0.000369334	0.925613	59028	0.00155933	0	0	0.00671109	56
BICRO232	ATTCGATC	ATTCGATC	0	0	0	0	0	0	1853636	1	1853636	0	0	925154	0.499102	928482	0.500898	1997	0.00107734	0	0	0	0	0	0	0	0	0	0	0	3099840498	237019319	100741879	100328666	0.995898	413213	0.0041017	36171	0.000359046	0.709298	30452	0.000302277	0.922435	147542	0.00146455	0	0	0.00622758	56
BICRO232	ATTCGCGA	ATTCGCGA	0	0	0	0	0	0	314195	1	314195	0	0	159156	0.506552	155039	0.493448	36	0.000114579	0	0	0	0	0	0	0	0	0	0	0	3096685171	237019319	17221367	17126109	0.994469	95258	0.00553138	6918	0.00040171	0.70425	4721	0.000274136	0.92544	16934	0.000983313	0	0	0.00719054	56
BICRO232	ATTCGGAT	ATTCGGAT	0	0	0	0	0	0	2126608	1	2126608	0	0	1064856	0.50073	1061752	0.49927	2006	0.000943286	0	0	0	0	0	0	0	0	0	0	0	3099347680	237019319	115716919	115189907	0.995446	527012	0.00455432	47797	0.000413051	0.744314	37981	0.000328223	0.919644	162283	0.00140241	0	0	0.00669801	56
BICRO232	ATTCGTCG	ATTCGTCG	0	0	0	0	0	0	2191594	1	2191594	0	0	1090665	0.497658	1100929	0.502342	1718	0.000783904	0	0	0	0	0	0	0	0	0	0	0	3098921086	237019319	119475727	118885987	0.995064	589740	0.00493607	65732	0.00055017	0.703037	46363	0.000388054	0.929599	152680	0.00127792	0	0	0.00715221	56
BICRO232	CACTGATC	CACTGATC	0	0	0	0	0	0	834863	1	834863	0	0	417523	0.50011	417340	0.49989	957	0.0011463	0	0	0	0	0	0	0	0	0	0	0	3099405672	237019319	45227470	45001311	0.995	226159	0.00500048	21383	0.000472788	0.70832	15619	0.000345343	0.923042	76528	0.00169207	0	0	0.00751068	56
BICRO232	CACTGCGA	CACTGCGA	0	0	0	0	0	0	669044	1	669044	0	0	334955	0.500647	334089	0.499353	654	0.000977514	0	0	0	0	0	0	0	0	0	0	0	3098763042	237019319	36247413	36043025	0.994361	204388	0.00563869	24327	0.000671138	0.621778	14142	0.000390152	0.916702	62835	0.0017335	0	0	0.00843348	56
BICRO232	CAGTCATC	CAGTCATC	0	0	0	0	0	0	2043566	1	2043566	0	0	1019676	0.498969	1023890	0.501031	2563	0.00125418	0	0	0	0	0	0	0	0	0	0	0	3099944266	237019419	110813930	110341832	0.99574	472098	0.00426028	38332	0.000345913	0.70419	32137	0.000290009	0.910477	179721	0.00162183	0	0	0.00651803	56
BICRO232	CAGTCCGA	CAGTCCGA	0	0	0	0	0	0	2675	1	2675	0	0	1338	0.500187	1337	0.499813	3	0.0011215	0	0	0	0	0	0	0	0	0	0	0	3036661415	200630282	144118	143384	0.994907	734	0.00509305	101	0.000700815	0.316832	29	0.000201224	0.827586	277	0.00192204	0	0	0.00791712	56
BICRO232	CAGTCGAT	CAGTCGAT	0	0	0	0	0	0	929925	1	929925	0	0	463923	0.498882	466002	0.501118	1166	0.00125386	0	0	0	0	0	0	0	0	0	0	0	3099706446	237019319	50323702	50091607	0.995388	232095	0.00461204	20618	0.000409708	0.673732	15776	0.00031349	0.917913	89159	0.00177171	0	0	0.00710695	56
BICRO232	CAGTCTCG	CAGTCTCG	0	0	0	0	0	0	4135	1	4135	0	0	2244	0.542684	1891	0.457316	1	0.000241838	0	0	0	0	0	0	0	0	0	0	0	3036841108	200630282	223946	222700	0.994436	1246	0.00556384	74	0.000330437	0.72973	52	0.000232199	0.884615	453	0.00202281	0	0	0.00814929	56
BICRO232	CATCAATC	CATCAATC	0	0	0	0	0	0	6768	1	6768	0	0	3396	0.501773	3372	0.498227	10	0.00147754	0	0	0	0	0	0	0	0	0	0	0	3036661415	200630282	369823	367870	0.994719	1953	0.0052809	146	0.000394783	0.780822	119	0.000321776	0.915966	449	0.00121409	0	0	0.00721156	56
BICRO232	CATCACGC	CATCACGC	0	0	0	0	0	0	1498183	1	1498183	0	0	749221	0.500086	748962	0.499914	1783	0.00119011	0	0	0	0	0	0	0	0	0	0	0	3099433965	237019419	81246999	80905424	0.995796	341575	0.00420416	28655	0.00035269	0.737603	25145	0.000309488	0.921694	131337	0.00161652	0	0	0.00648285	56
BICRO232	CATCAGAA	CATCAGAA	0	0	0	0	0	0	932470	1	932470	0	0	474395	0.508751	458075	0.491249	65	6.97073e-05	0	0	0	0	0	0	0	0	0	0	0	3037532821	200630282	51395193	51150137	0.995232	245056	0.00476807	23739	0.000461891	0.759636	20085	0.000390795	0.925915	28895	0.000562212	0	0	0.00618297	56
BICRO232	CATCATCC	CATCATCC	0	0	0	0	0	0	93582	1	93582	0	0	48927	0.522825	44655	0.477175	16	0.000170973	0	0	0	0	0	0	0	0	0	0	0	3097543826	237019319	5114480	5085118	0.994259	29362	0.00574096	1656	0.000323787	0.732488	1126	0.000220159	0.89254	6610	0.00129241	0	0	0.00757731	56
BICRO232	CGGATATC	CGGATATC	0	0	0	0	0	0	3369	1	3369	0	0	1469	0.436034	1900	0.563966	3	0.000890472	0	0	0	0	0	0	0	0	0	0	0	3036844806	200630282	183045	181995	0.994264	1050	0.00573629	67	0.00036603	0.746269	37	0.000202136	0.891892	288	0.00157338	0	0	0.00787784	56
BICRO232	CGGATCGA	CGGATCGA	0	0	0	0	0	0	2835512	1	2835512	0	0	1421505	0.501322	1414007	0.498678	1965	0.000692997	0	0	0	0	0	0	0	0	0	0	0	3097392133	237019319	154869246	154127948	0.995213	741298	0.00478661	67143	0.000433546	0.748328	54605	0.000352588	0.928285	182281	0.001177	0	0	0.00674974	56
BICRO232	CGGATGAT	CGGATGAT	0	0	0	0	0	0	13467	1	13467	0	0	7000	0.519789	6467	0.480211	2	0.000148511	0	0	0	0	0	0	0	0	0	0	0	3095936966	237019319	738924	735104	0.99483	3820	0.00516968	284	0.000384343	0.75	322	0.000435769	0.906832	665	0.000899957	0	0	0.00688975	56
BICRO232	CGGATTCG	CGGATTCG	0	0	0	0	0	0	1935209	1	1935209	0	0	967975	0.500191	967234	0.499809	2559	0.00132234	0	0	0	0	0	0	0	0	0	0	0	3099645518	237019319	104741308	104315703	0.995937	425605	0.00406339	39407	0.000376232	0.754714	34942	0.000333603	0.924675	181576	0.00173357	0	0	0.00650679	56
BICRO232	CGTGTCGC	CGTGTCGC	0	0	0	0	0	0	8324	1	8324	0	0	4146	0.498078	4178	0.501922	13	0.00156175	0	0	0	0	0	0	0	0	0	0	0	3038273028	200630282	447457	445513	0.995655	1944	0.00434455	174	0.000388864	0.712644	187	0.000417917	0.935829	1028	0.00229743	0	0	0.00744876	56
BICRO232	CGTGTGAG	CGTGTGAG	0	0	0	0	0	0	2281	1	2281	0	0	887	0.388865	1394	0.611135	7	0.00306883	0	0	0	0	0	0	0	0	0	0	0	3036482217	200630282	122353	121778	0.9953	575	0.00469952	49	0.000400481	0.714286	34	0.000277884	0.941176	308	0.00251731	0	0	0.00789519	56
BICRO232	CGTGTTCA	CGTGTTCA	0	0	0	0	0	0	579920	1	579920	0	0	290998	0.50179	288922	0.49821	72	0.000124155	0	0	0	0	0	0	0	0	0	0	0	3098691132	237019319	31990716	31842480	0.995366	148236	0.00463372	15914	0.000497457	0.747706	13747	0.000429718	0.941005	14211	0.000444223	0	0	0.00600512	56
BICRO232	CTAACCGC	CTAACCGC	0	0	0	0	0	0	8651	1	8651	0	0	4478	0.517628	4173	0.482372	12	0.00138712	0	0	0	0	0	0	0	0	0	0	0	3036522869	200630282	467946	465868	0.995559	2078	0.00444068	177	0.000378249	0.745763	98	0.000209426	0.908163	934	0.00199596	0	0	0.00702431	56
BICRO232	CTAACGAG	CTAACGAG	0	0	0	0	0	0	2043645	1	2043645	0	0	1021171	0.499681	1022474	0.500319	2581	0.00126294	0	0	0	0	0	0	0	0	0	0	0	3099525773	237019319	110795652	110345019	0.995933	450633	0.00406724	39660	0.000357956	0.742789	34707	0.000313252	0.921457	181421	0.00163744	0	0	0.00637589	56
BICRO232	CTAACTCA	CTAACTCA	0	0	0	0	0	0	11752	1	11752	0	0	6274	0.533867	5478	0.466133	2	0.000170184	0	0	0	0	0	0	0	0	0	0	0	3036320415	200630282	645288	642056	0.994991	3232	0.00500862	354	0.000548592	0.822034	179	0.000277396	0.960894	653	0.00101195	0	0	0.00684656	56
BICRO232	CTATGATC	CTATGATC	0	0	0	0	0	0	1982104	1	1982104	0	0	989071	0.499001	993033	0.500999	1930	0.000973713	0	0	0	0	0	0	0	0	0	0	0	3099399230	237019319	107789813	107319400	0.995636	470413	0.00436417	46253	0.000429104	0.742892	39175	0.000363439	0.924799	151992	0.00141008	0	0	0.00656679	56
BICRO232	CTATGCGA	CTATGCGA	0	0	0	0	0	0	1878468	1	1878468	0	0	937784	0.499228	940684	0.500772	2101	0.00111846	0	0	0	0	0	0	0	0	0	0	0	3099555109	237019319	101938289	101487356	0.995576	450933	0.00442359	38197	0.000374707	0.733801	32533	0.000319144	0.91922	160204	0.00157158	0	0	0.00668902	56
BICRO232	CTATGGAT	CTATGGAT	0	0	0	0	0	0	2074087	1	2074087	0	0	1035586	0.499297	1038501	0.500703	2306	0.00111181	0	0	0	0	0	0	0	0	0	0	0	3100156706	237019419	112686214	112218261	0.995847	467953	0.00415271	38822	0.000344514	0.722915	34009	0.000301803	0.91464	167280	0.00148448	0	0	0.0062835	56
BICRO232	CTATGTCG	CTATGTCG	0	0	0	0	0	0	1910506	1	1910506	0	0	955937	0.500358	954569	0.499642	2122	0.0011107	0	0	0	0	0	0	0	0	0	0	0	3099777093	237019319	103739043	103286110	0.995634	452933	0.00436608	38114	0.000367403	0.730204	32945	0.000317576	0.920929	158623	0.00152906	0	0	0.00658012	56
BICRO232	GAATCATC	GAATCATC	0	0	0	0	0	0	2993616	1	2993616	0	0	1492207	0.498463	1501409	0.501537	1809	0.000604286	0	0	0	0	0	0	0	0	0	0	0	3099767100	237019319	163997498	163235061	0.995351	762437	0.00464908	85219	0.000519636	0.738439	63997	0.000390232	0.929122	155024	0.000945283	0	0	0.00650423	56
BICRO232	GAATCCGA	GAATCCGA	0	0	0	0	0	0	1604816	1	1604816	0	0	800350	0.498718	804466	0.501282	1609	0.00100261	0	0	0	0	0	0	0	0	0	0	0	3099917368	237019319	87190565	86821092	0.995762	369473	0.00423753	31784	0.000364535	0.735779	27162	0.000311525	0.920183	129125	0.00148095	0	0	0.00639455	56
BICRO232	GAATCGAT	GAATCGAT	0	0	0	0	0	0	1665421	1	1665421	0	0	831241	0.499118	834180	0.500882	1918	0.00115166	0	0	0	0	0	0	0	0	0	0	0	3099882229	237019419	90328319	89945425	0.995761	382894	0.00423891	33558	0.000371511	0.742953	28780	0.000318615	0.921543	145038	0.00160568	0	0	0.00653472	56
BICRO232	GAATCTCG	GAATCTCG	0	0	0	0	0	0	2230802	1	2230802	0	0	1115682	0.500126	1115120	0.499874	2659	0.00119195	0	0	0	0	0	0	0	0	0	0	0	3099258918	237019319	120990590	120464943	0.995655	525647	0.00434453	43593	0.000360301	0.709082	36632	0.000302767	0.916002	194161	0.00160476	0	0	0.00661236	56
BICRO232	GACACCGC	GACACCGC	0	0	0	0	0	0	7598	1	7598	0	0	3637	0.478679	3961	0.521321	12	0.00157936	0	0	0	0	0	0	0	0	0	0	0	3097321453	237019319	409248	407403	0.995492	1845	0.00450827	156	0.000381187	0.775641	104	0.000254125	0.913462	900	0.00219916	0	0	0.00734274	56
BICRO232	GACACGAG	GACACGAG	0	0	0	0	0	0	1821351	1	1821351	0	0	909921	0.499586	911430	0.500414	2108	0.00115738	0	0	0	0	0	0	0	0	0	0	0	3099928654	237019319	98738910	98336129	0.995921	402781	0.00407925	35301	0.000357519	0.739696	32398	0.000328118	0.919409	161253	0.00163313	0	0	0.00639801	56
BICRO232	GACACTCA	GACACTCA	0	0	0	0	0	0	1645826	1	1645826	0	0	821405	0.499084	824421	0.500916	2038	0.00123828	0	0	0	0	0	0	0	0	0	0	0	3099602950	237019319	89229743	88853151	0.99578	376592	0.00422048	31499	0.00035301	0.734531	27615	0.000309482	0.920007	145515	0.00163079	0	0	0.00651376	56
BICRO232	GCTCAATC	GCTCAATC	0	0	0	0	0	0	2533	1	2533	0	0	1304	0.514805	1229	0.485195	2	0.000789578	0	0	0	0	0	0	0	0	0	0	0	3095963480	237019319	137225	136071	0.99159	1154	0.00840955	52	0.00037894	0.557692	43	0.000313354	0.953488	272	0.00198215	0	0	0.011084	56
BICRO232	GCTCACGA	GCTCACGA	0	0	0	0	0	0	2049262	1	2049262	0	0	1024453	0.499913	1024809	0.500087	2169	0.00105843	0	0	0	0	0	0	0	0	0	0	0	3099564190	237019319	111321432	110843612	0.995708	477820	0.00429226	39691	0.000356544	0.73334	35626	0.000320028	0.918795	165360	0.00148543	0	0	0.00645426	56
BICRO232	GCTCAGAT	GCTCAGAT	0	0	0	0	0	0	4289	1	4289	0	0	2024	0.471905	2265	0.528095	5	0.00116577	0	0	0	0	0	0	0	0	0	0	0	3096403056	237019319	233668	232595	0.995408	1073	0.00459199	92	0.000393721	0.608696	71	0.00030385	0.957746	340	0.00145506	0	0	0.00674461	56
BICRO232	GCTCATCG	GCTCATCG	0	0	0	0	0	0	1591713	1	1591713	0	0	795964	0.500068	795749	0.499932	2084	0.00130928	0	0	0	0	0	0	0	0	0	0	0	3099718408	237019319	86181267	85812699	0.995723	368568	0.00427666	30916	0.000358732	0.734312	26795	0.000310914	0.917223	148617	0.00172447	0	0	0.00667078	56
BICRO232	GCTTGCGC	GCTTGCGC	0	0	0	0	0	0	1068270	1	1068270	0	0	533887	0.499768	534383	0.500232	1420	0.00132925	0	0	0	0	0	0	0	0	0	0	0	3099735606	237019319	57853558	57621924	0.995996	231634	0.0040038	18746	0.000324025	0.728529	17129	0.000296075	0.914005	98336	0.00169974	0	0	0.00632364	56
BICRO232	GCTTGGAG	GCTTGGAG	0	0	0	0	0	0	3405	1	3405	0	0	1563	0.459031	1842	0.540969	4	0.00117474	0	0	0	0	0	0	0	0	0	0	0	3036665113	200630282	183716	182985	0.996021	731	0.00397897	717	0.00390276	0.0474198	39	0.000212284	0.846154	396	0.0021555	0	0	0.0102495	56
BICRO232	GCTTGTCA	GCTTGTCA	0	0	0	0	0	0	361067	1	361067	0	0	181203	0.501854	179864	0.498146	31	8.58566e-05	0	0	0	0	0	0	0	0	0	0	0	3096217866	237019319	19852621	19751728	0.994918	100893	0.0050821	9737	0.000490464	0.778679	7148	0.000360053	0.912563	14409	0.000725798	0	0	0.00665842	56
BICRO232	GTACGATC	GTACGATC	0	0	0	0	0	0	251266	1	251266	0	0	125431	0.499196	125835	0.500804	355	0.00141285	0	0	0	0	0	0	0	0	0	0	0	3099254623	237019319	13585565	13527336	0.995714	58229	0.00428609	4759	0.000350298	0.726833	4302	0.00031666	0.922129	24854	0.00182944	0	0	0.00678249	56
BICRO232	GTACGCGA	GTACGCGA	0	0	0	0	0	0	811363	1	811363	0	0	405109	0.499294	406254	0.500706	1192	0.00146913	0	0	0	0	0	0	0	0	0	0	0	3099783007	237019319	43866922	43690741	0.995984	176181	0.00401626	13919	0.000317301	0.72067	12944	0.000295074	0.915868	80245	0.00182928	0	0	0.00645792	56
BICRO232	GTACGGAT	GTACGGAT	0	0	0	0	0	0	732557	1	732557	0	0	366241	0.499949	366316	0.500051	650	0.000887303	0	0	0	0	0	0	0	0	0	0	0	3097375420	237019319	39866021	39673994	0.995183	192027	0.00481681	18150	0.000455275	0.748871	14533	0.000364546	0.927682	55985	0.00140433	0	0	0.00704096	56
BICRO232	GTACGTCG	GTACGTCG	0	0	0	0	0	0	697749	1	697749	0	0	348807	0.499903	348942	0.500097	950	0.00136152	0	0	0	0	0	0	0	0	0	0	0	3099650115	237019319	37726792	37567887	0.995788	158905	0.00421199	13700	0.000363137	0.746277	12276	0.000325392	0.920169	69156	0.00183307	0	0	0.0067336	56
BICRO232	GTCGTATC	GTCGTATC	0	0	0	0	0	0	647422	1	647422	0	0	322774	0.498553	324648	0.501447	920	0.00142102	0	0	0	0	0	0	0	0	0	0	0	3099308463	237019319	35013945	34863962	0.995716	149983	0.00428352	12772	0.000364769	0.735437	11236	0.000320901	0.922926	63556	0.00181516	0	0	0.00678435	56
BICRO232	GTCGTCGC	GTCGTCGC	0	0	0	0	0	0	17254	1	17254	0	0	8651	0.501391	8603	0.498609	30	0.00173873	0	0	0	0	0	0	0	0	0	0	0	3037695834	200630282	935308	930667	0.995038	4641	0.004962	450	0.000481125	0.708889	386	0.000412698	0.92487	1560	0.0016679	0	0	0.00752372	56
BICRO232	GTCGTGAA	GTCGTGAA	0	0	0	0	0	0	591319	1	591319	0	0	295309	0.499407	296010	0.500593	810	0.00136982	0	0	0	0	0	0	0	0	0	0	0	3099394635	237019319	31981812	31830802	0.995278	151010	0.00472175	11463	0.000358422	0.734799	10016	0.000313178	0.915735	57968	0.00181253	0	0	0.00720588	56
BICRO232	GTCGTTCC	GTCGTTCC	0	0	0	0	0	0	2711	1	2711	0	0	1366	0.503873	1345	0.496127	1	0.000368868	0	0	0	0	0	0	0	0	0	0	0	3036482217	200630282	145881	145267	0.995791	614	0.00420891	55	0.00037702	0.672727	38	0.000260486	0.947368	326	0.0022347	0	0	0.00708111	56
BICRO232	GTGCAATC	GTGCAATC	0	0	0	0	0	0	745799	1	745799	0	0	373398	0.500668	372401	0.499332	939	0.00125905	0	0	0	0	0	0	0	0	0	0	0	3099673559	237019319	40346432	40144464	0.994994	201968	0.00500585	18137	0.000449532	0.670508	12397	0.000307264	0.915705	73466	0.00182088	0	0	0.00758352	56
BICRO232	GTGCACGA	GTGCACGA	0	0	0	0	0	0	683398	1	683398	0	0	341280	0.499387	342118	0.500613	1042	0.00152473	0	0	0	0	0	0	0	0	0	0	0	3099565452	237019319	36840612	36678106	0.995589	162506	0.00441106	13602	0.000369212	0.715924	11736	0.000318561	0.918712	74685	0.00202725	0	0	0.00712608	56
BICRO232	TAGACATC	TAGACATC	0	0	0	0	0	0	2888215	1	2888215	0	0	1443731	0.49987	1444484	0.50013	1197	0.000414443	0	0	0	0	0	0	0	0	0	0	0	3099543098	237019319	158288513	157523232	0.995165	765281	0.00483472	83623	0.000528295	0.738206	63558	0.000401533	0.923456	146722	0.000926928	0	0	0.00669148	56
BICRO232	TAGACCGA	TAGACCGA	0	0	0	0	0	0	1702531	1	1702531	0	0	850100	0.499315	852431	0.500685	2238	0.00131451	0	0	0	0	0	0	0	0	0	0	0	3099901314	237019319	92178507	91783808	0.995718	394699	0.0042819	33679	0.000365367	0.699011	28521	0.000309411	0.918201	159042	0.00172537	0	0	0.00668205	56
BICRO232	TAGACGAT	TAGACGAT	0	0	0	0	0	0	2221967	1	2221967	0	0	1110708	0.499876	1111259	0.500124	2524	0.00113593	0	0	0	0	0	0	0	0	0	0	0	3099800280	237019319	120613469	120114439	0.995863	499030	0.00413743	42653	0.000353634	0.741167	38731	0.000321117	0.922878	184495	0.00152964	0	0	0.00634182	56
BICRO232	TAGACTCG	TAGACTCG	0	0	0	0	0	0	794544	1	794544	0	0	396538	0.499076	398006	0.500924	1154	0.00145241	0	0	0	0	0	0	0	0	0	0	0	3099966015	237019419	42941858	42758397	0.995728	183461	0.00427231	16154	0.000376183	0.740931	13525	0.000314961	0.922144	80520	0.00187509	0	0	0.00683855	56
BICRO232	TAGGTCGC	TAGGTCGC	0	0	0	0	0	0	16847	1	16847	0	0	8355	0.495934	8492	0.504066	26	0.0015433	0	0	0	0	0	0	0	0	0	0	0	3037399914	200630282	910371	906261	0.995485	4110	0.00451464	348	0.000382262	0.772989	289	0.000317453	0.906574	1722	0.00189154	0	0	0.00710589	56
BICRO232	TAGGTGAG	TAGGTGAG	0	0	0	0	0	0	875	1	875	0	0	379	0.433143	496	0.566857	1	0.00114286	0	0	0	0	0	0	0	0	0	0	0	3036482217	200630282	47099	46862	0.994968	237	0.00503195	26	0.000552029	0.769231	17	0.000360942	0.882353	103	0.00218688	0	0	0.00813181	56
BICRO232	TAGGTTCA	TAGGTTCA	0	0	0	0	0	0	1730726	1	1730726	0	0	865291	0.499958	865435	0.500042	1861	0.00107527	0	0	0	0	0	0	0	0	0	0	0	3099126897	237019319	94014241	93608766	0.995687	405475	0.00431291	35116	0.000373518	0.740916	30763	0.000327216	0.921724	141350	0.0015035	0	0	0.00651714	56
BICRO232	TCACACGC	TCACACGC	0	0	0	0	0	0	1177902	1	1177902	0	0	588419	0.499548	589483	0.500452	1227	0.00104168	0	0	0	0	0	0	0	0	0	0	0	3098372698	237019319	63995424	63725235	0.995778	270189	0.004222	23562	0.000368183	0.737671	20577	0.000321539	0.925111	95028	0.00148492	0	0	0.00639664	56
BICRO232	TCACAGAG	TCACAGAG	0	0	0	0	0	0	1511420	1	1511420	0	0	755049	0.499563	756371	0.500437	1570	0.00103876	0	0	0	0	0	0	0	0	0	0	0	3099469290	237019319	82047102	81696086	0.995722	351016	0.00427823	29729	0.000362341	0.736049	26239	0.000319804	0.924616	126424	0.00154087	0	0	0.00650124	56
BICRO232	TCACATCA	TCACATCA	0	0	0	0	0	0	620858	1	620858	0	0	310867	0.500705	309991	0.499295	85	0.000136907	0	0	0	0	0	0	0	0	0	0	0	3036482217	200630282	34082509	33906555	0.994837	175954	0.00516259	14820	0.000434827	0.753036	11265	0.000330521	0.940346	28707	0.00084228	0	0	0.00677022	56
BICRO232	TCCGAATC	TCCGAATC	0	0	0	0	0	0	8525	1	8525	0	0	4284	0.502522	4241	0.497478	6	0.000703812	0	0	0	0	0	0	0	0	0	0	0	3036884194	200630282	463012	460515	0.994607	2497	0.00539295	201	0.000434114	0.751244	156	0.000336924	0.891026	716	0.0015464	0	0	0.00771038	56
BICRO232	TCCGACGA	TCCGACGA	0	0	0	0	0	0	2753635	1	2753635	0	0	1381843	0.501825	1371792	0.498175	2692	0.000977617	0	0	0	0	0	0	0	0	0	0	0	3097784453	237019319	149881852	149159047	0.995178	722805	0.0048225	65492	0.000436958	0.743083	51122	0.000341082	0.918059	206912	0.0013805	0	0	0.00698104	56
BICRO232	TCCGAGAT	TCCGAGAT	0	0	0	0	0	0	4872242	1	4872242	0	0	2433176	0.499396	2439066	0.500604	431	8.84603e-05	0	0	0	0	0	0	0	0	0	0	0	3098691065	237019319	268561499	267312347	0.995349	1249152	0.00465127	138788	0.000516783	0.76962	114376	0.000425884	0.928499	129903	0.000483699	0	0	0.00607764	56
BICRO232	TCCGATCG	TCCGATCG	0	0	0	0	0	0	2575684	1	2575684	0	0	1289717	0.500728	1285967	0.499272	2794	0.00108476	0	0	0	0	0	0	0	0	0	0	0	3099691464	237019319	139917099	139319184	0.995727	597915	0.00427335	59446	0.000424866	0.748562	51799	0.000370212	0.925636	208313	0.00148883	0	0	0.00655726	56
BICRO232	TGATGATC	TGATGATC	0	0	0	0	0	0	820422	1	820422	0	0	410652	0.500538	409770	0.499462	1041	0.00126886	0	0	0	0	0	0	0	0	0	0	0	3099116424	237019319	44423592	44236894	0.995797	186698	0.00420268	16346	0.000367958	0.744831	14296	0.000321811	0.918019	76377	0.00171929	0	0	0.00661173	56
BICRO232	TGATGCGC	TGATGCGC	0	0	0	0	0	0	1224813	1	1224813	0	0	612182	0.499817	612631	0.500183	1271	0.00103771	0	0	0	0	0	0	0	0	0	0	0	3099695128	237019319	66564833	66275616	0.995655	289217	0.00434489	24994	0.000375484	0.731576	21315	0.000320214	0.916772	98407	0.00147836	0	0	0.00651895	56
BICRO232	TGATGGAA	TGATGGAA	0	0	0	0	0	0	558873	1	558873	0	0	279186	0.499552	279687	0.500448	739	0.0013223	0	0	0	0	0	0	0	0	0	0	0	3099038402	237019319	30242812	30115320	0.995784	127492	0.00421561	10530	0.000348182	0.729915	9673	0.000319845	0.922154	53538	0.00177027	0	0	0.00665391	56
BICRO232	TGATGTCC	TGATGTCC	0	0	0	0	0	0	1175046	1	1175046	0	0	586600	0.499214	588446	0.500786	1220	0.00103826	0	0	0	0	0	0	0	0	0	0	0	3098053100	237019319	63828222	63536200	0.995425	292022	0.00457512	25307	0.000396486	0.73695	20006	0.000313435	0.905828	97637	0.00152968	0	0	0.00681473	56
BICRO232	TGCATATC	TGCATATC	0	0	0	0	0	0	2350553	1	2350553	0	0	1172556	0.498843	1177997	0.501157	2023	0.000860649	0	0	0	0	0	0	0	0	0	0	0	3099255043	237019319	128052673	127442929	0.995238	609744	0.00476167	63539	0.000496194	0.725665	47839	0.000373588	0.92387	167057	0.0013046	0	0	0.00693604	56
BICRO232	TGCATCGA	TGCATCGA	0	0	0	0	0	0	692089	1	692089	0	0	345806	0.499655	346283	0.500345	840	0.00121372	0	0	0	0	0	0	0	0	0	0	0	3099528537	237019319	37475874	37317719	0.99578	158155	0.00422018	13359	0.000356469	0.723707	11733	0.000313081	0.923123	64852	0.0017305	0	0	0.00662023	56
BICRO232	TGCATGAT	TGCATGAT	0	0	0	0	0	0	1227522	1	1227522	0	0	613004	0.499383	614518	0.500617	1458	0.00118776	0	0	0	0	0	0	0	0	0	0	0	3099826515	237019319	66533708	66251802	0.995763	281906	0.00423704	25213	0.000378951	0.740134	21271	0.000319703	0.918716	115991	0.00174334	0	0	0.00667904	56
BICRO232	TGCATTCG	TGCATTCG	0	0	0	0	0	0	699325	1	699325	0	0	349352	0.499556	349973	0.500444	958	0.00136989	0	0	0	0	0	0	0	0	0	0	0	3099393137	237019319	37834127	37674812	0.995789	159315	0.00421088	13102	0.000346301	0.721111	11772	0.000311148	0.917856	67404	0.00178157	0	0	0.0066499	56
BICRO232	TGTACATC	TGTACATC	0	0	0	0	0	0	828950	1	828950	0	0	414633	0.500191	414317	0.499809	1277	0.0015405	0	0	0	0	0	0	0	0	0	0	0	3099824143	237019319	44732808	44532753	0.995528	200055	0.00447222	16548	0.00036993	0.707276	13669	0.00030557	0.911552	87088	0.00194685	0	0	0.00709457	56
BICRO232	TGTACCGA	TGTACCGA	0	0	0	0	0	0	964926	1	964926	0	0	482422	0.499958	482504	0.500042	1225	0.00126953	0	0	0	0	0	0	0	0	0	0	0	3099393137	237019319	52188339	51923206	0.99492	265133	0.00508031	26348	0.000504864	0.634356	15961	0.000305835	0.90552	96626	0.00185149	0	0	0.0077425	56
[truncated: 9 more columns]

## Sheet: BICRO217
Supplementary Table 1. Summary of sequencing runs.
Seq_library	Sample	Library	#QCFail	QCFailFraction	#DuplicateMarked	DuplicateFraction	#Unmapped	UnmappedFraction	#Mapped	MappedFraction	#MappedRead1	#MappedRead2	RatioMapped2vsMapped1	#MappedForward	MappedForwardFraction	#MappedReverse	MappedReverseFraction	#SecondaryAlignments	SecondaryAlignmentFraction	#SupplementaryAlignments	SupplementaryAlignmentFraction	#SplicedAlignments	SplicedAlignmentFraction	#Pairs	#MappedPairs	MappedPairsFraction	#MappedSameChr	MappedSameChrFraction	#MappedProperPair	MappedProperFraction	#ReferenceBp	#ReferenceNs	#AlignedBases	#MatchedBases	MatchRate	#MismatchedBases	MismatchRate	#DeletionsCigarD	DeletionRate	HomopolymerContextDel	#InsertionsCigarI	InsertionRate	HomopolymerContextIns	#SoftClippedCigarS	SoftClipRate	#HardClippedCigarH	HardClipRate	ErrorRate	MedianReadLength
NZ28	ACAGTATC	ACAGTATC	0	0	0	0	0	0	378	1	378	0	0	191	0.505291	187	0.494709	0	0	0	0	0	0	0	0	0	0	0	0	0	3036476140	200630281	20662	20593	0.996661	69	0.00333946	2	9.67961e-05	0.5	6	0.000290388	1	19	0.000919562	0	0	0.00464621	56
NZ28	ACAGTCGA	ACAGTCGA	0	0	0	0	0	0	2526	1	2526	0	0	1262	0.499604	1264	0.500396	0	0	0	0	0	0	0	0	0	0	0	0	0	3036563527	200630282	137974	137464	0.996304	510	0.00369635	35	0.000253671	0.6	34	0.000246423	0.941176	174	0.00126111	0	0	0.00545755	56
NZ28	ACGACATC	ACGACATC	0	0	0	0	0	0	2218	1	2218	0	0	1144	0.51578	1074	0.48422	1	0.000450857	0	0	0	0	0	0	0	0	0	0	0	3096062641	237019318	121690	121261	0.996475	429	0.00352535	13	0.000106829	0.692308	21	0.00017257	1	104	0.000854631	0	0	0.00465938	56
NZ28	ACGACCGC	ACGACCGC	0	0	0	0	0	0	1972	1	1972	0	0	1000	0.507099	972	0.492901	0	0	0	0	0	0	0	0	0	0	0	0	0	3037044882	200630282	108670	108395	0.997469	275	0.0025306	16	0.000147235	0.875	26	0.000239256	0.961538	59	0.000542928	0	0	0.00346002	56
NZ28	ACGACGAA	ACGACGAA	0	0	0	0	0	0	2397	1	2397	0	0	1185	0.494368	1212	0.505632	0	0	0	0	0	0	0	0	0	0	0	0	0	3036833709	200630282	130520	130192	0.997487	328	0.00251302	9	6.89549e-05	0.777778	21	0.000160895	0.904762	204	0.00156298	0	0	0.00430585	56
NZ28	ACGACTCC	ACGACTCC	0	0	0	0	0	0	1795	1	1795	0	0	926	0.515877	869	0.484123	0	0	0	0	0	0	0	0	0	0	0	0	0	3096086620	237019319	98908	98668	0.997574	240	0.0024265	8	8.08832e-05	0.75	13	0.000131435	1	54	0.000545962	0	0	0.00318478	56
NZ28	ACTGAATC	ACTGAATC	0	0	0	0	0	0	1859672	1	1859672	0	0	929867	0.500017	929805	0.499983	55	2.95751e-05	0	0	0	0	0	0	0	0	0	0	0	3099872877	237019419	102647797	102408994	0.997674	238803	0.00232643	11131	0.000108439	0.616027	21145	0.000205996	0.914306	38714	0.000377154	0	0	0.00301802	56
NZ28	ACTGACGA	ACTGACGA	0	0	0	0	0	0	897387	1	897387	0	0	448724	0.500034	448663	0.499966	12	1.33722e-05	0	0	0	0	0	0	0	0	0	0	0	3099777576	237019319	49525560	49413207	0.997731	112353	0.00226859	5339	0.000107803	0.621465	11238	0.000226913	0.922584	21068	0.000425397	0	0	0.0030287	56
NZ28	ACTGAGAT	ACTGAGAT	0	0	0	0	0	0	861406	1	861406	0	0	430331	0.499568	431075	0.500432	7	8.12625e-06	0	0	0	0	0	0	0	0	0	0	0	3099598192	237019319	47575939	47467817	0.997727	108122	0.00227262	5223	0.000109782	0.627609	10857	0.000228204	0.925762	16069	0.000337755	0	0	0.00294836	56
NZ28	ACTGATCG	ACTGATCG	0	0	0	0	0	0	730557	1	730557	0	0	365440	0.500221	365117	0.499779	12	1.64258e-05	0	0	0	0	0	0	0	0	0	0	0	3099636560	237019319	40336142	40244859	0.997737	91283	0.00226306	4303	0.000106679	0.637462	9005	0.000223249	0.921821	14766	0.000366074	0	0	0.00295906	56
NZ28	AGCCACGC	AGCCACGC	0	0	0	0	0	0	1931	1	1931	0	0	934	0.483687	997	0.516313	0	0	0	0	0	0	0	0	0	0	0	0	0	3036401725	200630282	106100	105772	0.996909	328	0.00309142	22	0.000207352	0.681818	21	0.000197926	0.952381	81	0.000763431	0	0	0.00426013	56
NZ28	AGCCAGAG	AGCCAGAG	0	0	0	0	0	0	2003	1	2003	0	0	984	0.491263	1019	0.508737	0	0	0	0	0	0	0	0	0	0	0	0	0	3036492709	200630282	109993	109733	0.997636	260	0.00236379	12	0.000109098	0.666667	38	0.000345477	0.842105	80	0.000727319	0	0	0.00354568	56
NZ28	AGCCATCA	AGCCATCA	0	0	0	0	0	0	939	1	939	0	0	476	0.506922	463	0.493078	0	0	0	0	0	0	0	0	0	0	0	0	0	3036482217	200630282	51475	51313	0.996853	162	0.00314716	6	0.000116561	1	12	0.000233123	1	56	0.00108791	0	0	0.00458475	56
NZ28	AGCGTATC	AGCGTATC	0	0	0	0	0	0	105921	1	105921	0	0	52870	0.499146	53051	0.500854	2	1.8882e-05	0	0	0	0	0	0	0	0	0	0	0	3098373206	237019319	5841850	5828834	0.997772	13016	0.00222806	634	0.000108527	0.623028	1304	0.000223217	0.929448	2522	0.000431713	0	0	0.00299152	56
NZ28	AGCGTCGA	AGCGTCGA	0	0	0	0	0	0	7202	1	7202	0	0	3637	0.504999	3565	0.495001	0	0	0	0	0	0	0	0	0	0	0	0	0	3097216713	237019319	396186	391047	0.987029	5139	0.0129712	28	7.06739e-05	0.5	79	0.000199401	0.924051	321	0.000810226	0	0	0.0140515	56
NZ28	AGCGTGAT	AGCGTGAT	0	0	0	0	0	0	485628	1	485628	0	0	243220	0.500836	242408	0.499164	4	8.23676e-06	0	0	0	0	0	0	0	0	0	0	0	3099431527	237019419	26830425	26770052	0.99775	60373	0.00225017	2913	0.000108571	0.615517	6282	0.000234137	0.921999	8117	0.00030253	0	0	0.00289541	56
NZ28	AGCGTTCG	AGCGTTCG	0	0	0	0	0	0	634985	1	634985	0	0	317445	0.499925	317540	0.500075	8	1.25987e-05	0	0	0	0	0	0	0	0	0	0	0	3099556470	237019319	35069313	34993791	0.997846	75522	0.00215351	3873	0.000110438	0.630003	7878	0.000224641	0.925362	12582	0.000358775	0	0	0.00284736	56
NZ28	ATGTGCGC	ATGTGCGC	0	0	0	0	0	0	142577	1	142577	0	0	71137	0.498937	71440	0.501063	1	7.01375e-06	0	0	0	0	0	0	0	0	0	0	0	3098624777	237019319	7875427	7858019	0.99779	17408	0.00221042	829	0.000105264	0.647768	1891	0.000240114	0.932311	2403	0.000305126	0	0	0.00286092	56
NZ28	ATGTGGAG	ATGTGGAG	0	0	0	0	0	0	709184	1	709184	0	0	354156	0.499385	355028	0.500615	9	1.26906e-05	0	0	0	0	0	0	0	0	0	0	0	3099725354	237019319	39150335	39063639	0.997786	86696	0.00221444	4196	0.000107177	0.626787	9200	0.000234992	0.918478	15638	0.000399435	0	0	0.00295604	56
NZ28	ATGTGTCA	ATGTGTCA	0	0	0	0	0	0	1092	1	1092	0	0	563	0.515568	529	0.484432	0	0	0	0	0	0	0	0	0	0	0	0	0	3036362567	200630282	59923	59766	0.99738	157	0.00262003	14	0.000233633	0.785714	17	0.000283697	0.882353	50	0.000834404	0	0	0.00397176	56
NZ28	ATTCGATC	ATTCGATC	0	0	0	0	0	0	1398408	1	1398408	0	0	699921	0.500513	698487	0.499487	33	2.35983e-05	0	0	0	0	0	0	0	0	0	0	0	3100123716	237019319	77176485	77005780	0.997788	170705	0.00221188	8378	0.000108556	0.624851	17056	0.000221	0.926067	30598	0.000396468	0	0	0.0029379	56
NZ28	ATTCGCGA	ATTCGCGA	0	0	0	0	0	0	944285	1	944285	0	0	471933	0.499778	472352	0.500222	39	4.13011e-05	0	0	0	0	0	0	0	0	0	0	0	3099909729	237019319	52110500	51991955	0.997725	118545	0.00227488	5719	0.000109748	0.632104	11950	0.00022932	0.925021	21010	0.000403182	0	0	0.00301713	56
NZ28	ATTCGGAT	ATTCGGAT	0	0	0	0	0	0	3801	1	3801	0	0	1940	0.510392	1861	0.489608	0	0	0	0	0	0	0	0	0	0	0	0	0	3096265989	237019319	207194	206529	0.99679	665	0.00320955	39	0.000188229	0.692308	53	0.000255799	0.924528	274	0.00132243	0	0	0.00497601	56
NZ28	ATTCGTCG	ATTCGTCG	0	0	0	0	0	0	3333	1	3333	0	0	1668	0.50045	1665	0.49955	1	0.00030003	0	0	0	0	0	0	0	0	0	0	0	3096507402	237019319	182065	181485	0.996814	580	0.00318568	25	0.000137314	0.48	46	0.000252657	0.934783	192	0.00105457	0	0	0.00463021	56
NZ28	CACTGATC	CACTGATC	0	0	0	0	0	0	596000	1	596000	0	0	298119	0.5002	297881	0.4998	6	1.00671e-05	0	0	0	0	0	0	0	0	0	0	0	3099728175	237019319	32900248	32825119	0.997716	75129	0.00228354	3609	0.000109695	0.618454	6989	0.00021243	0.920446	12412	0.000377262	0	0	0.00298293	56
NZ28	CACTGCGA	CACTGCGA	0	0	0	0	0	0	1422	1	1422	0	0	671	0.471871	751	0.528129	0	0	0	0	0	0	0	0	0	0	0	0	0	3096028077	237019319	78223	77989	0.997009	234	0.00299145	7	8.94877e-05	0.857143	15	0.000191759	0.933333	44	0.000562494	0	0	0.00383519	56
NZ28	CAGTCATC	CAGTCATC	0	0	0	0	0	0	649793	1	649793	0	0	325242	0.500532	324551	0.499468	21	3.2318e-05	0	0	0	0	0	0	0	0	0	0	0	3099212373	237019319	35835025	35755326	0.997776	79699	0.00222405	4005	0.000111762	0.626217	8092	0.000225813	0.922887	16385	0.000457234	0	0	0.00301886	56
NZ28	CAGTCCGA	CAGTCCGA	0	0	0	0	0	0	317353	1	317353	0	0	158773	0.500304	158580	0.499696	4	1.26043e-05	0	0	0	0	0	0	0	0	0	0	0	3098913884	237019319	17494165	17454680	0.997743	39485	0.00225704	1867	0.000106721	0.619175	3983	0.000227676	0.92242	8356	0.000477645	0	0	0.00306908	56
NZ28	CAGTCGAT	CAGTCGAT	0	0	0	0	0	0	1531	1	1531	0	0	782	0.510777	749	0.489223	0	0	0	0	0	0	0	0	0	0	0	0	0	3036919783	200630282	83727	83553	0.997922	174	0.00207818	13	0.000155267	0.692308	12	0.000143323	0.916667	74	0.000883825	0	0	0.0032606	56
NZ28	CAGTCTCG	CAGTCTCG	0	0	0	0	0	0	1130	1	1130	0	0	564	0.499115	566	0.500885	0	0	0	0	0	0	0	0	0	0	0	0	0	3036458133	200630282	61869	61741	0.997931	128	0.00206889	3	4.84896e-05	1	18	0.000290937	0.888889	59	0.000953628	0	0	0.00336194	56
NZ28	CATCAATC	CATCAATC	0	0	0	0	0	0	259423	1	259423	0	0	129858	0.500565	129565	0.499435	5	1.92735e-05	0	0	0	0	0	0	0	0	0	0	0	3099844420	237019319	14330336	14296847	0.997663	33489	0.00233693	1640	0.000114443	0.622561	3208	0.000223861	0.910848	3986	0.000278151	0	0	0.00295339	56
NZ28	CATCACGC	CATCACGC	0	0	0	0	0	0	1114	1	1114	0	0	533	0.478456	581	0.521544	1	0.000897666	0	0	0	0	0	0	0	0	0	0	0	3036401725	200630282	61332	61177	0.997473	155	0.00252723	6	9.78282e-05	0.5	15	0.000244571	0.933333	45	0.000733712	0	0	0.00360334	56
NZ28	CATCAGAA	CATCAGAA	0	0	0	0	0	0	76851	1	76851	0	0	38495	0.500904	38356	0.499096	1	1.30122e-05	0	0	0	0	0	0	0	0	0	0	0	3098804374	237019319	4242469	4232226	0.997586	10243	0.0024144	450	0.00010607	0.611111	997	0.000235005	0.920762	1423	0.000335418	0	0	0.00309089	56
NZ28	CATCATCC	CATCATCC	0	0	0	0	0	0	4905	1	4905	0	0	2461	0.501733	2444	0.498267	0	0	0	0	0	0	0	0	0	0	0	0	0	3036654511	200630282	270865	270274	0.997818	591	0.0021819	23	8.49131e-05	0.695652	57	0.000210437	0.947368	109	0.000402414	0	0	0.00287966	56
NZ28	CGGATATC	CGGATATC	0	0	0	0	0	0	634961	1	634961	0	0	318025	0.500858	316936	0.499142	13	2.04737e-05	0	0	0	0	0	0	0	0	0	0	0	3099093305	237019319	35068513	34990738	0.997782	77775	0.0022178	3833	0.0001093	0.62875	7998	0.000228068	0.918105	11368	0.000324165	0	0	0.00287934	56
NZ28	CGGATCGA	CGGATCGA	0	0	0	0	0	0	844448	1	844448	0	0	422399	0.500207	422049	0.499793	30	3.55262e-05	0	0	0	0	0	0	0	0	0	0	0	3099781355	237019319	46608418	46506097	0.997805	102321	0.00219533	5060	0.000108564	0.632213	10878	0.000233391	0.927928	18179	0.000390037	0	0	0.00292733	56
NZ28	CGGATGAT	CGGATGAT	0	0	0	0	0	0	3076	1	3076	0	0	1587	0.51593	1489	0.48407	0	0	0	0	0	0	0	0	0	0	0	0	0	3036956276	200630282	168689	168280	0.997575	409	0.00242458	12	7.11368e-05	0.75	32	0.000189698	0.9375	152	0.000901066	0	0	0.00358648	56
NZ28	CGGATTCG	CGGATTCG	0	0	0	0	0	0	3107	1	3107	0	0	1513	0.486965	1594	0.513035	1	0.000321854	0	0	0	0	0	0	0	0	0	0	0	3036563527	200630282	170202	169672	0.996886	530	0.00311395	36	0.000211513	0.555556	45	0.000264392	0.911111	187	0.00109869	0	0	0.00468855	56
NZ28	CGTGTCGC	CGTGTCGC	0	0	0	0	0	0	1390	1	1390	0	0	691	0.497122	699	0.502878	0	0	0	0	0	0	0	0	0	0	0	0	0	3036482217	200630282	76216	76001	0.997179	215	0.00282093	8	0.000104965	0.5	15	0.000196809	1	64	0.000839719	0	0	0.00396242	56
NZ28	CGTGTGAG	CGTGTGAG	0	0	0	0	0	0	176630	1	176630	0	0	88534	0.50124	88096	0.49876	1	5.66155e-06	0	0	0	0	0	0	0	0	0	0	0	3099118759	237019319	9757570	9735733	0.997762	21837	0.00223795	1074	0.000110068	0.631285	2319	0.000237662	0.938335	2965	0.000303867	0	0	0.00288955	56
NZ28	CGTGTTCA	CGTGTTCA	0	0	0	0	0	0	1599	1	1599	0	0	761	0.475922	838	0.524078	0	0	0	0	0	0	0	0	0	0	0	0	0	3036656805	200630282	87567	87262	0.996517	305	0.00348305	17	0.000194137	0.411765	27	0.000308335	0.888889	81	0.000925006	0	0	0.00491053	56
NZ28	CTAACCGC	CTAACCGC	0	0	0	0	0	0	1148538	1	1148538	0	0	575483	0.501057	573055	0.498943	30	2.61202e-05	0	0	0	0	0	0	0	0	0	0	0	3099878920	237019319	63424804	63280929	0.997732	143875	0.00226843	6850	0.000108002	0.623796	13913	0.000219362	0.92029	22216	0.000350273	0	0	0.00294607	56
NZ28	CTAACGAG	CTAACGAG	0	0	0	0	0	0	1013927	1	1013927	0	0	507448	0.500478	506479	0.499522	37	3.64918e-05	0	0	0	0	0	0	0	0	0	0	0	3099767114	237019319	55979009	55851391	0.99772	127618	0.00227975	6124	0.000109398	0.633573	12493	0.000223173	0.925878	19978	0.000356884	0	0	0.0029692	56
NZ28	CTAACTCA	CTAACTCA	0	0	0	0	0	0	901	1	901	0	0	440	0.488346	461	0.511654	0	0	0	0	0	0	0	0	0	0	0	0	0	3036303846	200630281	49696	49543	0.996921	153	0.00307872	6	0.000120734	0.833333	7	0.000140856	0.857143	26	0.000523181	0	0	0.00386349	56
NZ28	CTATGATC	CTATGATC	0	0	0	0	0	0	2472	1	2472	0	0	1233	0.498786	1239	0.501214	0	0	0	0	0	0	0	0	0	0	0	0	0	3036866408	200630282	135406	134367	0.992327	1039	0.00767322	17	0.000125548	0.588235	25	0.00018463	0.88	148	0.00109301	0	0	0.00907641	56
NZ28	CTATGCGA	CTATGCGA	0	0	0	0	0	0	1391321	1	1391321	0	0	695653	0.499995	695668	0.500005	27	1.9406e-05	0	0	0	0	0	0	0	0	0	0	0	3099909685	237019419	76814168	76643001	0.997772	171167	0.00222833	8163	0.000106269	0.617788	17275	0.000224893	0.922894	30880	0.000402009	0	0	0.0029615	56
NZ28	CTATGGAT	CTATGGAT	0	0	0	0	0	0	1403	1	1403	0	0	701	0.499644	702	0.500356	0	0	0	0	0	0	0	0	0	0	0	0	0	3036654511	200630282	76659	76443	0.997182	216	0.00281767	10	0.000130448	0.7	19	0.000247851	0.842105	82	0.00106967	0	0	0.00426564	56
NZ28	CTATGTCG	CTATGTCG	0	0	0	0	0	0	1576	1	1576	0	0	817	0.518401	759	0.481599	0	0	0	0	0	0	0	0	0	0	0	0	0	3036320415	200630282	86171	85729	0.994871	442	0.00512934	13	0.000150863	0.769231	17	0.000197282	0.882353	96	0.00111406	0	0	0.00659154	56
NZ28	GAATCATC	GAATCATC	0	0	0	0	0	0	402839	1	402839	0	0	201830	0.501019	201009	0.498981	3	7.44714e-06	0	0	0	0	0	0	0	0	0	0	0	3099058812	237019319	22237884	22185686	0.997653	52198	0.00234726	2357	0.00010599	0.615613	4875	0.00021922	0.921231	8062	0.000362534	0	0	0.003035	56
NZ28	GAATCCGA	GAATCCGA	0	0	0	0	0	0	1959	1	1959	0	0	997	0.508933	962	0.491067	0	0	0	0	0	0	0	0	0	0	0	0	0	3037084585	200630282	107317	106733	0.994558	584	0.00544182	15	0.000139773	0.6	18	0.000167727	0.944444	106	0.000987728	0	0	0.00673705	56
NZ28	GAATCGAT	GAATCGAT	0	0	0	0	0	0	2231	1	2231	0	0	1096	0.49126	1135	0.50874	0	0	0	0	0	0	0	0	0	0	0	0	0	3037081346	200630281	122163	121793	0.996971	370	0.00302874	26	0.00021283	0.576923	27	0.000221016	0.888889	122	0.000998666	0	0	0.00446125	56
NZ28	GAATCTCG	GAATCTCG	0	0	0	0	0	0	1591	1	1591	0	0	809	0.508485	782	0.491515	0	0	0	0	0	0	0	0	0	0	0	0	0	3036497225	200630282	86961	86722	0.997252	239	0.00274836	13	0.000149492	0.461538	19	0.000218489	0.947368	89	0.00102345	0	0	0.00413979	56
NZ28	GACACCGC	GACACCGC	0	0	0	0	0	0	172894	1	172894	0	0	86205	0.4986	86689	0.5014	5	2.89195e-05	0	0	0	0	0	0	0	0	0	0	0	3098962940	237019319	9551627	9530288	0.997766	21339	0.00223407	1099	0.000115059	0.620564	2175	0.00022771	0.91954	2518	0.00026362	0	0	0.00284046	56
NZ28	GACACGAG	GACACGAG	0	0	0	0	0	0	2777	1	2777	0	0	1382	0.497659	1395	0.502341	1	0.000360101	0	0	0	0	0	0	0	0	0	0	0	3036482217	200630282	151568	151057	0.996629	511	0.00337142	29	0.000191333	0.551724	34	0.000224322	0.941176	169	0.00111501	0	0	0.00490209	56
NZ28	GACACTCA	GACACTCA	0	0	0	0	0	0	1068	1	1068	0	0	550	0.514981	518	0.485019	0	0	0	0	0	0	0	0	0	0	0	0	0	3095839214	237019318	58441	58259	0.996886	182	0.00311425	11	0.000188224	0.818182	16	0.00027378	0.9375	58	0.000992454	0	0	0.00456871	56
NZ28	GCTCAATC	GCTCAATC	0	0	0	0	0	0	165557	1	165557	0	0	83010	0.501398	82547	0.498602	10	6.04022e-05	0	0	0	0	0	0	0	0	0	0	0	3098157917	237019319	9134383	9111419	0.997486	22964	0.00251402	976	0.000106849	0.617828	2077	0.000227383	0.926818	4007	0.000438672	0	0	0.00328692	56
NZ28	GCTCACGA	GCTCACGA	0	0	0	0	0	0	3813	1	3813	0	0	1898	0.497771	1915	0.502229	0	0	0	0	0	0	0	0	0	0	0	0	0	3036829099	200630282	209550	207800	0.991649	1750	0.00835123	28	0.00013362	0.607143	39	0.000186113	0.897436	185	0.000882844	0	0	0.00955381	56
NZ28	GCTCAGAT	GCTCAGAT	0	0	0	0	0	0	2709	1	2709	0	0	1401	0.517165	1308	0.482835	0	0	0	0	0	0	0	0	0	0	0	0	0	3036654511	200630282	148477	147109	0.990786	1368	0.00921355	12	8.08206e-05	0.583333	36	0.000242462	0.888889	141	0.000949642	0	0	0.0104865	56
NZ28	GCTCATCG	GCTCATCG	0	0	0	0	0	0	2817	1	2817	0	0	1409	0.500177	1408	0.499823	0	0	0	0	0	0	0	0	0	0	0	0	0	3037013402	200630282	154750	153791	0.993803	959	0.00619709	16	0.000103393	0.4375	36	0.000232633	0.944444	126	0.000814216	0	0	0.00734733	56
NZ28	GCTTGCGC	GCTTGCGC	0	0	0	0	0	0	2430	1	2430	0	0	1207	0.496708	1223	0.503292	2	0.000823045	0	0	0	0	0	0	0	0	0	0	0	3036543799	200630282	133349	132951	0.997015	398	0.00298465	25	0.000187478	0.88	28	0.000209975	0.857143	126	0.000944889	0	0	0.00432699	56
NZ28	GCTTGGAG	GCTTGGAG	0	0	0	0	0	0	1686	1	1686	0	0	873	0.517794	813	0.482206	0	0	0	0	0	0	0	0	0	0	0	0	0	3095855783	237019319	92443	92223	0.99762	220	0.00237984	11	0.000118992	0.818182	30	0.000324524	1	86	0.000930303	0	0	0.00375366	56
NZ28	GCTTGTCA	GCTTGTCA	0	0	0	0	0	0	281668	1	281668	0	0	140796	0.499865	140872	0.500135	4	1.42011e-05	0	0	0	0	0	0	0	0	0	0	0	3099104676	237019319	15552291	15518356	0.997818	33935	0.00218199	1720	0.000110595	0.630233	3467	0.000222925	0.932218	6064	0.00038991	0	0	0.00290542	56
NZ28	GTACGATC	GTACGATC	0	0	0	0	0	0	911	1	911	0	0	438	0.48079	473	0.51921	0	0	0	0	0	0	0	0	0	0	0	0	0	3095866275	237019319	49787	49583	0.995903	204	0.00409746	7	0.000140599	1	12	0.000241027	0.833333	59	0.00118505	0	0	0.00566413	56
NZ28	GTACGCGA	GTACGCGA	0	0	0	0	0	0	610490	1	610490	0	0	305671	0.500698	304819	0.499302	5	8.19014e-06	0	0	0	0	0	0	0	0	0	0	0	3099338655	237019319	33691185	33615979	0.997768	75206	0.00223222	3594	0.000106675	0.611018	7738	0.000229674	0.920393	12838	0.000381049	0	0	0.00294961	56
NZ28	GTACGGAT	GTACGGAT	0	0	0	0	0	0	24656	1	24656	0	0	12222	0.495701	12434	0.504299	0	0	0	0	0	0	0	0	0	0	0	0	0	3037412611	200630282	1354013	1350394	0.997327	3619	0.0026728	144	0.000106351	0.590278	291	0.000214917	0.931271	1349	0.000996298	0	0	0.00399036	56
NZ28	GTACGTCG	GTACGTCG	0	0	0	0	0	0	280032	1	280032	0	0	139788	0.499186	140244	0.500814	1	3.57102e-06	0	0	0	0	0	0	0	0	0	0	0	3099529226	237019319	15469077	15433740	0.997716	35337	0.00228436	1665	0.000107634	0.64024	3558	0.000230007	0.925239	4944	0.000319605	0	0	0.00294161	56
NZ28	GTCGTATC	GTCGTATC	0	0	0	0	0	0	7698	1	7698	0	0	3794	0.492855	3904	0.507145	0	0	0	0	0	0	0	0	0	0	0	0	0	3037236829	200630282	424313	422328	0.995322	1985	0.00467815	41	9.66268e-05	0.682927	86	0.000202681	0.930233	215	0.000506701	0	0	0.00548416	56
NZ28	GTCGTCGC	GTCGTCGC	0	0	0	0	0	0	222858	1	222858	0	0	111708	0.501252	111150	0.498748	8	3.58973e-05	0	0	0	0	0	0	0	0	0	0	0	3098503672	237019319	12304848	12276762	0.997717	28086	0.00228251	1235	0.000100367	0.626721	2913	0.000236736	0.917954	3696	0.000300369	0	0	0.00291999	56
NZ28	GTCGTGAA	GTCGTGAA	0	0	0	0	0	0	615249	1	615249	0	0	307625	0.500001	307624	0.499999	19	3.08818e-05	0	0	0	0	0	0	0	0	0	0	0	3099578367	237019419	33959945	33873963	0.997468	85982	0.00253187	3484	0.000102591	0.62256	7927	0.000233422	0.923805	11791	0.000347203	0	0	0.00321508	56
NZ28	GTCGTTCC	GTCGTTCC	0	0	0	0	0	0	326960	1	326960	0	0	163612	0.500404	163348	0.499596	17	5.19941e-05	0	0	0	0	0	0	0	0	0	0	0	3099347987	237019319	18047121	18006221	0.997734	40900	0.00226629	1939	0.000107441	0.632285	3970	0.00021998	0.924685	7212	0.000399621	0	0	0.00299333	56
NZ28	GTGCAATC	GTGCAATC	0	0	0	0	0	0	8520	1	8520	0	0	4299	0.504577	4221	0.495423	0	0	0	0	0	0	0	0	0	0	0	0	0	3096592658	237019319	468653	467494	0.997527	1159	0.00247305	46	9.81536e-05	0.608696	93	0.000198441	0.892473	286	0.00061026	0	0	0.0033799	56
NZ28	GTGCACGA	GTGCACGA	0	0	0	0	0	0	426826	1	426826	0	0	213597	0.500431	213229	0.499569	8	1.8743e-05	0	0	0	0	0	0	0	0	0	0	0	3099525513	237019319	23577987	23526290	0.997807	51697	0.0021926	2558	0.000108491	0.640735	5402	0.000229112	0.929841	7094	0.000300874	0	0	0.00283107	56
NZ28	TAGACATC	TAGACATC	0	0	0	0	0	0	2578	1	2578	0	0	1252	0.485648	1326	0.514352	0	0	0	0	0	0	0	0	0	0	0	0	0	3036492709	200630282	141474	139855	0.988556	1619	0.0114438	20	0.000141369	0.85	28	0.000197916	0.857143	126	0.000890623	0	0	0.0126737	56
NZ28	TAGACCGA	TAGACCGA	0	0	0	0	0	0	3298	1	3298	0	0	1597	0.484233	1701	0.515767	0	0	0	0	0	0	0	0	0	0	0	0	0	3037341365	200630282	181008	179786	0.993249	1222	0.00675108	18	9.94431e-05	0.611111	30	0.000165739	0.9	151	0.000834217	0	0	0.00785048	56
NZ28	TAGACGAT	TAGACGAT	0	0	0	0	0	0	275788	1	275788	0	0	137753	0.499489	138035	0.500511	4	1.45039e-05	0	0	0	0	0	0	0	0	0	0	0	3098904590	237019319	15206511	15172154	0.997741	34357	0.00225936	1691	0.000111202	0.637493	3441	0.000226285	0.922988	7062	0.000464406	0	0	0.00306125	56
NZ28	TAGACTCG	TAGACTCG	0	0	0	0	0	0	594	1	594	0	0	288	0.484848	306	0.515152	0	0	0	0	0	0	0	0	0	0	0	0	0	3036499613	200630282	32340	32275	0.99799	65	0.00200989	4	0.000123686	0.5	10	0.000309215	0.9	47	0.00145331	0	0	0.0038961	56
NZ28	TAGGTCGC	TAGGTCGC	0	0	0	0	0	0	3789	1	3789	0	0	1863	0.491686	1926	0.508314	0	0	0	0	0	0	0	0	0	0	0	0	0	3036665113	200630282	209044	208514	0.997465	530	0.00253535	22	0.000105241	0.545455	48	0.000229617	0.916667	109	0.000521421	0	0	0.00339163	56
NZ28	TAGGTGAG	TAGGTGAG	0	0	0	0	0	0	408021	1	408021	0	0	204063	0.500129	203958	0.499871	11	2.69594e-05	0	0	0	0	0	0	0	0	0	0	0	3099236668	237019319	22541463	22491735	0.997794	49728	0.00220607	2457	0.000108999	0.622711	5194	0.00023042	0.921255	6627	0.000293992	0	0	0.00283948	56
NZ28	TAGGTTCA	TAGGTTCA	0	0	0	0	0	0	722	1	722	0	0	366	0.506925	356	0.493075	1	0.00138504	0	0	0	0	0	0	0	0	0	0	0	3036495003	200630282	39524	39434	0.997723	90	0.0022771	4	0.000101204	0.5	12	0.000303613	1	40	0.00101204	0	0	0.00369396	56
NZ28	TCACACGC	TCACACGC	0	0	0	0	0	0	108446	1	108446	0	0	54285	0.500572	54161	0.499428	0	0	0	0	0	0	0	0	0	0	0	0	0	3098744950	237019319	5990042	5976523	0.997743	13519	0.00225691	647	0.000108013	0.632148	1304	0.000217695	0.919479	1839	0.00030701	0	0	0.00288963	56
NZ28	TCACAGAG	TCACAGAG	0	0	0	0	0	0	1971	1	1971	0	0	988	0.501268	983	0.498732	1	0.000507357	0	0	0	0	0	0	0	0	0	0	0	3036503311	200630282	108215	107867	0.996784	348	0.00321582	15	0.000138613	0.733333	38	0.000351153	0.973684	91	0.000840919	0	0	0.0045465	56
NZ28	TCACATCA	TCACATCA	0	0	0	0	0	0	881256	1	881256	0	0	441200	0.500649	440056	0.499351	26	2.95033e-05	0	0	0	0	0	0	0	0	0	0	0	3099852045	237019319	48641125	48529724	0.99771	111401	0.00229026	5224	0.000107399	0.607963	10953	0.00022518	0.924587	17350	0.000356694	0	0	0.00297954	56
NZ28	TCCGAATC	TCCGAATC	0	0	0	0	0	0	6515	1	6515	0	0	3212	0.493016	3303	0.506984	2	0.000306984	0	0	0	0	0	0	0	0	0	0	0	3097023142	237019319	358358	357235	0.996866	1123	0.00313374	56	0.000156268	0.589286	61	0.000170221	0.918033	244	0.000680883	0	0	0.00414111	56
NZ28	TCCGACGA	TCCGACGA	0	0	0	0	0	0	3482	1	3482	0	0	1739	0.499426	1743	0.500574	0	0	0	0	0	0	0	0	0	0	0	0	0	3036821077	200630282	183561	182672	0.995157	889	0.00484308	19	0.000103508	0.578947	45	0.00024515	0.866667	732	0.00398778	0	0	0.00917951	56
NZ28	TCCGAGAT	TCCGAGAT	0	0	0	0	0	0	1565038	1	1565038	0	0	783646	0.50072	781392	0.49928	55	3.51429e-05	0	0	0	0	0	0	0	0	0	0	0	3099673039	237019419	86339821	86147250	0.99777	192571	0.00223038	9143	0.000105896	0.625396	20075	0.000232511	0.927223	34691	0.000401796	0	0	0.00297059	56
NZ28	TCCGATCG	TCCGATCG	0	0	0	0	0	0	2815	1	2815	0	0	1390	0.493783	1425	0.506217	0	0	0	0	0	0	0	0	0	0	0	0	0	3036865684	200630282	154818	154315	0.996751	503	0.00324898	15	9.6888e-05	0.6	35	0.000226072	0.942857	106	0.000684675	0	0	0.00425661	56
NZ28	TGATGATC	TGATGATC	0	0	0	0	0	0	4138	1	4138	0	0	2106	0.508942	2032	0.491058	1	0.000241663	0	0	0	0	0	0	0	0	0	0	0	3036661415	200630282	228052	227115	0.995891	937	0.00410871	20	8.76993e-05	0.65	57	0.000249943	0.877193	126	0.000552506	0	0	0.00499886	56
NZ28	TGATGCGC	TGATGCGC	0	0	0	0	0	0	1314	1	1314	0	0	644	0.490107	670	0.509893	0	0	0	0	0	0	0	0	0	0	0	0	0	3036524369	200630282	72219	72025	0.997314	194	0.00268627	11	0.000152314	0.818182	14	0.000193855	0.928571	58	0.000803113	0	0	0.00383556	56
NZ28	TGATGGAA	TGATGGAA	0	0	0	0	0	0	575599	1	575599	0	0	288880	0.501877	286719	0.498123	13	2.25852e-05	0	0	0	0	0	0	0	0	0	0	0	3099656121	237019319	31771472	31698838	0.997714	72634	0.00228614	3479	0.000109501	0.622018	7404	0.000233039	0.927202	12221	0.000384653	0	0	0.00301333	56
NZ28	TGATGTCC	TGATGTCC	0	0	0	0	0	0	165559	1	165559	0	0	83273	0.502981	82286	0.497019	3	1.81204e-05	0	0	0	0	0	0	0	0	0	0	0	3098608364	237019319	9141795	9121281	0.997756	20514	0.00224398	915	0.00010009	0.632787	2076	0.000227089	0.912331	3059	0.000334617	0	0	0.00290578	56
NZ28	TGCATATC	TGCATATC	0	0	0	0	0	0	6349	1	6349	0	0	3147	0.495669	3202	0.504331	1	0.000157505	0	0	0	0	0	0	0	0	0	0	0	3036665113	200630282	349016	348050	0.997232	966	0.00276778	50	0.00014326	0.64	75	0.00021489	0.933333	249	0.000713434	0	0	0.00383937	56
NZ28	TGCATCGA	TGCATCGA	0	0	0	0	0	0	1074725	1	1074725	0	0	537926	0.500524	536799	0.499476	33	3.07055e-05	0	0	0	0	0	0	0	0	0	0	0	3100108086	237019319	59345557	59212656	0.997761	132901	0.00223944	6344	0.000106899	0.621059	13592	0.000229031	0.926869	20737	0.000349428	0	0	0.0029248	56
NZ28	TGCATGAT	TGCATGAT	0	0	0	0	0	0	382159	1	382159	0	0	191481	0.501051	190678	0.498949	8	2.09337e-05	0	0	0	0	0	0	0	0	0	0	0	3099494310	237019319	21040665	20985110	0.99736	55555	0.00264036	2282	0.000108457	0.608238	4741	0.000225326	0.923434	24102	0.0011455	0	0	0.00411964	56
NZ28	TGCATTCG	TGCATTCG	0	0	0	0	0	0	2354	1	2354	0	0	1214	0.515718	1140	0.484282	0	0	0	0	0	0	0	0	0	0	0	0	0	3037040272	200630282	129401	129063	0.997388	338	0.00261204	20	0.000154558	0.55	27	0.000208654	0.962963	98	0.000757336	0	0	0.00373258	56
NZ28	TGTACATC	TGTACATC	0	0	0	0	0	0	1690	1	1690	0	0	866	0.512426	824	0.487574	2	0.00118343	0	0	0	0	0	0	0	0	0	0	0	3036563527	200630282	91946	91553	0.995726	393	0.00427425	15	0.000163139	0.733333	30	0.000326278	0.833333	131	0.00142475	0	0	0.00618841	56
NZ28	TGTACCGA	TGTACCGA	0	0	0	0	0	0	1057136	1	1057136	0	0	528764	0.500185	528372	0.499815	6	5.67571e-06	0	0	0	0	0	0	0	0	0	0	0	3099962595	237019319	58411700	58280486	0.997754	131214	0.00224637	6308	0.000107992	0.627299	13079	0.000223911	0.921324	17826	0.000305179	0	0	0.00288345	56
[truncated: 9 more columns]

[truncated: 9 more sheets: BICRO220, BICRO275, BICRO276, BICRO277, BICRO278, BICRO284, BICRO246, BICRO260, BICRO261]
