# Supplementary material for: High clonal diversity and spatial genetic admixture in early prostate cancer and surrounding normal tissue
Source: Research Square preprint supplement (doi:10.21203/rs.3.rs-1093341/v1), 2021-11-19
Supplement: Supplementary file 6 [file c8fee9ebd7f523b2fdad3b24.xlsx]

## Sheet: scCUTseq
Supplementary Table 8. List of reagents and relative costs for scCUTseq, standard MALBAC or ACT.
Note: prices are based on official US prices displayed in the corresponding manufacturer websites in June 2021. Sequencing costs are not included in the list, since they are the same for all three methods.
Reagent	Brand (cat. no.)	Price (USD)	Amount	Vol. per cell / library	No. cells / libraries
1. MALBAC (cost per cell)
MALBAC kit	Yikon Genomics (YK001B)	1927	50 rxn	0.005 rxn	10000
2. Digestion and ligation (cost per cell)
NlaIII	NEB (R0125L)	414	250 μL	50 nL	5000
NlaIII adapter (each F+R oligo)	IDT (custom @100 μM)	17.2	400 μL	300 nL (@33 nM)	4000000
T4 DNA Ligase	Thermo (EL0011)	60	200 μL	200 nL	1000
ATP (100mM)	Thermo (R0441)	37	250 μL	120 nL	21000
BSA (50mg/ml)	Thermo (AM2616)	148	1 mL	30 nL	33300
3. Library preparation (cost per library)
AMPure XP beads	Beckman (A63881)	1240	60 mL	3.16 mL	19
MEGAscript kit	Thermo (AM1334)	466	80 μL	1.5 μL	53
RNaseOUT	Thermo (10777-019)	253	125 μL	2.5 μL	50
DNase I	Thermo (AM2222)	249	1 mL	1 μL	1000
RNAClean XP beads	Beckman (A63987)	800	40 mL	54 μL	740
RA3 adapter	IDT (custom @ 100 μM)	968	240 μL	1 μL (@ 10 μM)	2400
T4 RNA ligase 2, truncated	NEB (M0242L)	414	50 μL	1 μL	50
dNTP (25mM)	Thermo (R1121)	169	1 mL	1 μL	1000
RT primer (RTP)	IDT (custom @ 100 μM)	94	410 μL	2 μL (@ 10 μM)	2000
SuperScript IV	Thermo (18090050)	310	50 μL	2 μL	25
RP1 primer	IDT (custom @ 100 μM)	80	330 μL	8 μL (@ 10 μM)	410
RPI primer (each index)	IDT (custom @ 100 μM)	139	959 μL	8 μL (@ 10 μM)	1200
NEBNext Ultra II Q5 PCR Master Mix	NEB (M0544S)	395	6.25mL	100 μL	62

## Sheet: MALBAC
Supplementary Table 8. List of reagents and relative costs for scCUTseq, standard MALBAC or ACT.
Reagent	Brand (cat. no.)	Price (USD)	Amount	Vol. per cell	No. cells
1. Library preparation (cost per cell)
MALBAC kit	Yikon Genomics (YK001B)	1927	50 rxn	1 rxn	50
NEBNext Multiplex Oligos for Illumina set 1 (96 indexes)	NEB (E6440L)	2903	384 rxn	1 rxn	384
NEBNext Multiplex Oligos for Illumina set 2 (96 indexes)	NEB (E6442L)	2903	384 rxn	1 rxn	384
NEBNext Multiplex Oligos for Illumina set 3 (96 indexes)	NEB (E6444L)	2903	384 rxn	1 rxn	384
NEBNext Multiplex Oligos for Illumina set 4 (96 indexes)	NEB (E6446L)	2903	384 rxn	1 rxn	384
AMPure XP beads	Beckman (A63881)	1240	60 mL	102 μL	588
NEBNext Ultra II FS DNA Library Prep Kit	NEB (E7805L)	3810	96 rxn	1 rxn	96

## Sheet: ACT
Supplementary Table 8. List of reagents and relative costs for scCUTseq, standard MALBAC or ACT.
Reagent	Brand (cat. no.)	Price (USD)	Amount	Vol. per cell	No. cells
1. Library preparation (cost per cell)
Nextera XT DNA Library Preparation Kit	Illumina (FC-131-1096)	3572	96 rxn	0.04 rxn	2400
Nextera XT Index Kit v2 Set A+D	Illumina (FC-131-2001/ 2004)	2226	384 rxn	0.2 rxn	1920
HiFi Hot Start Ready Mix	Roche (KK2602)	552	6.25 mL	3 μL	2083
AMPure XP beads	Beckman (A63881)	1240	60 mL	10.8 μL	5555
