# Supplementary material for: High clonal diversity and spatial genetic admixture in early prostate cancer and surrounding normal tissue
Source: Research Square preprint supplement (doi:10.21203/rs.3.rs-1093341/v1), 2021-11-19
Supplement: Supplementary file 7 [file cc75c9c115c617d2c1636bf8.xlsx]

## Sheet: Sample P2
Supplementary Table 4. Locality index of the pseudo-diploid clones identified in prostate samples P2 and P5.
	Sample P2
Clone ID	Locality index
c8	0.970588
c7	0.941176
c17	0.941176
c18	0.852941
c6	0.852941
c16	0.705882
c24	0.647059
c48	0.617647
c20	0.617647
c39	0.617647
c35	0.617647
c1	0.617647
c10	0.588235
c26	0.588235
c28	0.588235
c36	0.588235
c30	0.588235
c4	0.588235
c27	0.588235
c32	0.558824
c29	0.558824
c23	0.558824
c19	0.529412
c13	0.529412
c21	0.529412
c41	0.5
c49	0.5
c38	0.470588
c12	0.470588
c25	0.470588
c14	0.470588
c37	0.441176
c33	0.441176
c44	0.411765
c22	0.411765
c11	0.382353
c9	0.352941
c34	0.264706
c31	0.264706
c42	0.264706
c51	0.235294
c15	0.205882
c5	0.205882
c46	0.205882
c3	0.147059
c50	0.147059
c47	0.117647
c40	0.0882353
c43	0.0882353
c45	0.0882353
c2	0.0588235

## Sheet: Sample P5
Supplementary Table 4. Locality index of the pseudo-diploid clones identified in prostate samples P2 and P5.
	Sample P5
Clone ID	Locality index
c11	0.892857
c13	0.821429
c15	0.785714
c34	0.785714
c37	0.785714
c30	0.75
c8	0.75
c14	0.714286
c16	0.714286
c26	0.714286
c32	0.714286
c46	0.678571
c39	0.678571
c42	0.678571
c36	0.642857
c18	0.642857
c44	0.607143
c17	0.607143
c41	0.607143
c23	0.607143
c12	0.571429
c31	0.571429
c38	0.571429
c48	0.535714
c43	0.535714
c9	0.535714
c47	0.535714
c29	0.535714
c1	0.5
c19	0.5
c4	0.5
c7	0.464286
c6	0.464286
c33	0.464286
c22	0.464286
c45	0.464286
c40	0.428571
c35	0.428571
c10	0.428571
c20	0.392857
c5	0.321429
c24	0.25
c27	0.25
c2	0.214286
c21	0.214286
c25	0.178571
c28	0.107143
c3	0.0714286
